# Supplementary material for: Clostridium sordellii outer spore proteins maintain spore structural integrity and promote bacterial clearance from the gastrointestinal tract
Source: PubMed Central journal article supplement (PMC5927469; doi:10.1371/journal.ppat.1007004), 2018-04-18
Supplement: ppat.1007004.s009.pdf [file ppat.1007004.s009.pdf]

## **S1 Appendix. Gene and protein sequences of CsA and CsB**

### **CsA protein sequence**

MKDLMRAKKVVSKRVTKPTQELENSYIETNEVEDDFERGCKSSGHKPQCHPYVQCECEC  
ECDCDCNHEHNHKNHHDCHSSCCNCNEDDCTENCFPNPCPEECSQPLTPPKFPISQAVLY  
PIETNRVFDTIMFRVFTDGKKSNGDDLDFKYELGNLCGPLSSARTNVITIEKVCINYSSI  
KINPGTTSLEQLKIEKVDRKSQKCKSVFEYDVCGQLNRCCNDKCLGQNVAYKEKGLNVVV  
YDLELELTGRFGCSEFTAVAIPCSKCESKHDNSNCVVFYFNTLSGDLVVPADGRGFTLRQ  
DFQTQLTVDCIGKGVITQKMVNNKPCYELDIPNGIDLVLCLQNVVSALIEEQIIVLGGPT  
RIRPRLVDTFGSVCDFSQFTGKCEADDDENHNNHKCK

### **csA gene sequence**

ATGAAGGATTTAATGAGAGCTAAAAAAGTAGTTAGCAAAAGAGTAACAAAGCCTACTCAA  
GAGTTAGAAAATAGTAGCTATATAGAAACAAATGAAGTTGAAGATGATTTTGAAAGAGGA  
TGCAAATCTAGTGGACACAAACCCCAATGTCATCCATATGTACAATGCGAGTGTGAATGT  
GAGTGTGATTGCGATTGTAATCATGAACACAATCATAAGCATAACCATGATTGCTACTCA  
AGTTGCTGTAATTGCAATGAAGATGATTGTACAGAGAATTGCTTCCCAAACCTTGTCCA  
GAAGAGTGTAGTCAGCCTTTAACACCACCTAAGTTTCTATATCACAAGCAGTTCTATAC  
CCTATAGAAACAAATAGAGTATTTGATACTATAATGTTTAGAGTATTTACTGATGGTAAA  
AAATCAAATGGAGATGATTTAGACTTTAAATATGAATTAGGTAAGTTATGTGGACCATTA  
CCAAGTTCTGCTCGTACAAATGTAAGTATAGAAAAAGTATGCATAAACTACTCAAGTATA  
AAAATTAACCCAGGGACAACATCATTAGAGCAATTAAGATTGAAAAAGTTGATAGAAAA  
TCACAAAAATGTAAGTCAGTTTTTGAATATGATGTTTGTGGTCAACTAAATAGATGCTGT  
AATGATAAGTGCTTAGGGCAAAATGTAGCATAACAAGAAAAAGGTTTAAATGTAGTTGTA  
TATGACTTAGAACTAGAATTAACAGGTAGATTTGGATGTTTCAAGAGTTTACTGCTGTAGCG  
ATACCATGTAGTAAATGTGAATCAAACATGACAATTCAAAGTGTGTAGTATTCTATTTT  
AATACTTTATCTGGTGATTTAGTAGTTCCAGCAGATGGAAGAGGATTTACTCTAAGACAA  
GACTTCCAGACTCAATTAACAGTTGACTGTATAGGAAAAGGTGTAATAACTCAAAAAATG  
GTTAACAATAAACCATGCTATGAGTTAGATATACCAAATGGAATAGATCTTGTACTTTGT  
TTACAAAATGTAGTAAGTGCATTAATAGAAGAACAATAATAGTTTTAGGTGGACCAACA  
AGAATTAGACCTAGATTAGTAGACACATTTGGTAGTGTGTTGTGACTTCTCTCAATTCACA  
GGAAAATGTGAAGCTGACGATGATGAAAATCATAACAATCACAATGTTGTAAATAA

### **CsB protein sequence**

MTKNNTAQTNSNIDNLTCDRLNSNQYRESQECNCYPERPSYDHCPPERPQYGHCHYEKPQYD  
HCPEKPQYGHCHKEKPQYDHCPEKPQYNHCHKEKPQHDYCPERPQYDPCCKGNKKPNCCCCSE  
AKFNQNECGKPCNPVKFECPDINCAICTPILADRIFDFKCVNQQIPRSIAPQVFTVDRP  
MGCPPYTAGAPVCIEKVTVVYDCLGFSNDLLPITLCNTSGSLTGTPQLCPSGEASVFHNY  
EGTISTGCICREKSTATLVQGPLDASIYNFYIYVEGFIGCDPFTARFPVTPSDAPDFLT

NINLFSTICLPNTDDPLTLRAQFDLKFVVKSIPTTFFSGGTFSARIFDELLISEKLYLT  
KSDALVVYSAPAEFKHHEK

***csB* gene sequence**

ATGACTAAAAATAATACAGCTCAAACAAACAGTAATATCGATAATCTTACTTGTGATAGA  
TTAAACTCTAATCAATATAGAGAAAGTCAAGAATGTAATTGTTATCCTGAAAGACCTAGC  
TATGATCATTGTCCAGAAAGACCTCAATACGGCCATTGTTATGAGAAACCTCAATATGAT  
CATTGCCCTGAGAAACCTCAGTATGGTCATTGTCATGAAAAGCCTCAGTATGATCATTGC  
CCTGAGAAACCTCAATACAATCATTGTCATGAAAAACCTCAACATGATTATTGCCCTGAA  
AGACCTCAGTATGACCCATGTAAAGGTAATAAAAAACCAAATTGCTGTTGTTGTTGTTGAGAA  
GCAAAATTTAATCAAAATGAATGTGGTAAACCTTGTAAACCCTGTGAAATTTGAATGCCCA  
GATATAAACTGTGCTATATGTACACCTATATTGGCAGATAGAATATTTGATTTCAAATGT  
GTAAATCAACAAATACCTAGATCTATAGCACCTCAAGTATTTACTGTAGATCCTAGACCT  
ATGGGATGTCCTCCATATACAGCTGGAGCTCCTGTATGTATAGAAAAAGTTACTGTAGTA  
TACGATTGTTTAGGGTTCTCAAATGATTTATTACCTATAACTTTATGTAATACTAGCGGT  
TCACTTACAGGAACACCTCAACTATGTCCTTCAGGTGAAGCATCTGTATTCCATAATTAT  
GAAGGAACAATATCTACAGGTTGTATTTGTCGTGAGAAAGGTTCAACTGCAACTTTAGTT  
CAAGGACCTTTGGATGCATCTATTTATAACTTCCAATATATAGTTGAAGGATTTATAGGT  
TGTGATCCTTTTACAGCTAGATTCCCAGTAACTCCATCAGATGCTCCTGATTTCTTAACA  
AATATAAACTTATTTAGCACTATTTGTTTACCTAATACTGATGATCCATTAACTTTAAGA  
GCTCAATTTGATCTTAAATTCGTAGTTAAATCTATAGTTCCAACAACACCTTTTCAGCGGA  
GGAACCTTTCAGTGCTAGAATATTTGATGAATTATTAATTAGTGAAAACTATACTTACA  
AAATCAGATGCACTAGTTGTATACTCAGCTCCTGCTGAATTTAAACATCACGAAAAATAA
