# Supplementary material for: Clostridium sordellii outer spore proteins maintain spore structural integrity and promote bacterial clearance from the gastrointestinal tract
Source: PLoS Pathog. 2018 Apr 18;14(4):e1007004. doi: 10.1371/journal.ppat.1007004 (PMC5927469; doi:10.1371/journal.ppat.1007004)
Supplement: S1 Table — Protein and peptide summaries are presented for exosporial extracts of two independent biological spore stocks. (XLSX) [file ppat.1007004.s007.xlsx]

## Sheet: Protein Summary Rep 1
N	Unused	Total	%Cov	%Cov(50)	%Cov(95)	Accession	Name	Species	Peptides(95%)			Gene Ontology	Gene Names	Pathway	Interactions	Protein Families	Subcellular Location	Function	Disease	Tissue Specificity	Keywords	Modifications	Natural Variants	Glycosylations	Propeptide	Signal Peptide	Initiator Methionine	Sequence Conflicts	Sequence Uncertainties	Alternative Sequence	Non-Standard Residues	Lipidations	Disulfide Bonds	Cross Links	Protein Existence	InterPro	Polymorphism	PTM	RNA Editing	Active Site	Binding Site	Entry	Entry Name	Entry Status	Sequence	Protein Names	Organism	Sequence Length	Features
1	35.66	35.66	89.51	87.27	87.27	tr|T0DXD7|T0DXD7_CLOSO	Uncharacterized protein OS=Paeniclostridium sordellii ATCC 9714 GN=H477_3144 PE=4 SV=1	CLOSO	52				ORF Names: H477_3144								Complete proteome; Reference proteome														predicted							T0DXD7	T0DXD7_CLOSO	not reviewed	MFRVFTDGKKSNGDDLDFKYELGNLCGPLPSSARTNVTIEKVCINYSSIKINPGTTSLEQLKIEKVDRKSQKCKSVFEYDVCGQLNRCCNDKCLGQNVAYKEKGLNVVVYDLELELTGRFGCSEFTAVAIPCSKCESKHDNSNCVVFYFNTLSGDLVVPADGRGFTLRQDFQTQLTVDCIGKGVITQKMVNNKPCYELDIPNGIDLVLCLQNVVSALIEEQIIVLGGPTRIRPRLVDTFGSVCDFSQFTGKCEADDDENHNNHKCCK	Uncharacterized protein	Paeniclostridium sordellii ATCC 9714	267
2	29.03	29.03	74.24	74.24	74.24	tr|T2RG98|T2RG98_CLOSO	Uncharacterized protein OS=Paeniclostridium sordellii ATCC 9714 GN=H477_4099 PE=4 SV=1	CLOSO	23				ORF Names: H477_4099								Complete proteome; Reference proteome														predicted							T2RG98	T2RG98_CLOSO	not reviewed	MADRIFDFKCVNQQIPRSIAPQVFTVDPRPMGCPPYTAGAPVCIEKVTVVYDCLGFSNDLLPITLCNTSGSLTGTPQLCPSGEASVFHNYEGTISTGCICREKGSTATLVQGPLDASIYNFQYIVEGFIGCDPFTARFPVTPSDAPDFLTNINLFSTICLPNTDDPLTLRAQFDLKFVVKSIVPTTPFSGGTFSARIFDELLISEKLYLTKSDALVVYSAPAEFKHHEK	Uncharacterized protein	Paeniclostridium sordellii ATCC 9714	229
3	24.21	24.21	63.61	63.61	61.31	tr|T0D4X3|T0D4X3_CLOSO	Translation elongation factor Tu OS=Paeniclostridium sordellii ATCC 9714 GN=tuf PE=4 SV=1	CLOSO	15			intracellular; GTP binding; GTPase activity; translation elongation factor activity	tuf (orf: H477_0026)								Complete proteome; Elongation factor; Protein biosynthesis; Reference proteome														predicted	IPR004161; IPR033720; IPR027417; IPR000795; IPR009000; IPR009001; IPR004541; IPR004160						T0D4X3	T0D4X3_CLOSO	not reviewed	MITGAAQMDGAILVCSATDGPMPQTREHILLSRQVGVPYIVVFLNKCDMVDDEELLELVEMEVRDLLNEYEFPGDDTPIVRGSALMALQDSSSEWGDKIVELFEQIDEYIPAPERDVDKDFLMPVEDVFSITGRGTVATGRVERGVLKVQDEVELVGLAEEPRKLVVTGVEMFRKLLDEAQAGDNIGALIRGIQRNEIERGQVLAKPGTVKPHTKFNAEVYVLKKEEGGRHTPFFDGYRPQFYFRTTDVTGACKLPEGVEMVMPGDNIQMTIELINSIAIEEGLRFAIREGGRTVASGVVASIIE	Translation elongation factor Tu	Paeniclostridium sordellii ATCC 9714	305	domain (1)
4	14.9	14.9	42.91	42.91	40.16	tr|T0CP16|T0CP16_CLOSO	Peroxiredoxin OS=Paeniclostridium sordellii ATCC 9714 GN=H477_2044 PE=3 SV=1	CLOSO	9			cytoplasm; peroxiredoxin activity; cell redox homeostasis	ORF Names: H477_2044			Belongs to the AhpC/TSA family. TDXH subfamily.; Contains 1 thioredoxin domain.	Cytoplasm.	Protects cells against oxidative stress. Can reduce hydrogen peroxide and/or alkyl hydroperoxides using dithiothreitol as an electron donor (in vitro).			Antioxidant; Complete proteome; Cytoplasm; Oxidoreductase; Redox-active center; Reference proteome														inferred from homology	IPR000866; IPR019479; IPR022915; IPR012336; IPR013766				46 Cysteine sulfenic acid (-SOH) intermediate	123 Substrate	T0CP16	T0CP16_CLOSO	not reviewed	MPCLPSLGTKAPNFSANTTFGPIKLSDYKGKWVVLFSHPGDFTPVCTTEFLCFAKYYSNFQKRNTELIGLSVDSNSSHLAWVYNIYRNTGVEIPFPIIDDRKMEISQLYGMISEPMSDSSTVRSVFIIDPNQILRTILYYPLTTGRNIPEIVRIIDALQTSDEQKVVTPADWLPGMPVILPPPKTYKELKQRISSCEKDKECIDWYLCFVPDKNLGIKSNKSINKKKLTAKSRPQINSPEDYVPQNPNCPDINN	Peroxiredoxin	Paeniclostridium sordellii ATCC 9714	254	domain (1); active site (1); binding site (1)
5	14.48	14.53	32.08	29.69	29.69	tr|T0E6S9|T0E6S9_CLOSO	Glycosyl hydrolases 18 family protein OS=Paeniclostridium sordellii ATCC 9714 GN=H477_2042 PE=3 SV=1	CLOSO	10			chitinase activity; carbohydrate metabolic process; chitin catabolic process	ORF Names: H477_2042			Belongs to the glycosyl hydrolase 18 family.					Complete proteome; Glycosidase; Hydrolase; Reference proteome														inferred from homology	IPR011583; IPR029070; IPR001223; IPR001579; IPR013781; IPR017853						T0E6S9	T0E6S9_CLOSO	not reviewed	MRQLLALRQDNPDLRVIVAIGGWGQDGFSDAALTPSSRYNFAREVNALIKEYNLDGIDIDWEYPATSAAGIKSRPEDRENFTLLLTAIRDVIGYDKWLSVAGTGDKAYINQSVEIDNIAPLIDYFNLMSYDFTAGETGPNAKKHHSNLYDSNLSIPGYSADAMVRNLIAAGMPSQKILLGIPFYGRLGATITKSYDQLRKDFINKNGYTYKFDRDAQAPYLEREGEFAMSYDDILSIYIKGQYVIDNCLGGMFSWMAPYDRANILARAMNEGINDPNKLRQEIEDTYGPGFLK	Glycosyl hydrolases 18 family protein	Paeniclostridium sordellii ATCC 9714	293	domain (1)
6	14.24	14.26	43.18	43.18	34.47	tr|T0E6L8|T0E6L8_CLOSO	Peptidase M20/M25/M40 family protein OS=Paeniclostridium sordellii ATCC 9714 GN=H477_0435 PE=4 SV=1	CLOSO	8			hydrolase activity; proteolysis	ORF Names: H477_0435								Complete proteome; Reference proteome														predicted	IPR002933; IPR011650; IPR001160						T0E6L8	T0E6L8_CLOSO	not reviewed	MDIIKQRGNANKLLGRLLNLLDVDFDLAKVEGGSKNNAIPREADAVIMINNDQKDKFVACVKEITEIFKHELRTSDPGFEIVCTETTKPELVFNAKSKDSVIKVLNLIPNAIQTMSMDIENLVESSTNLGVLRTTDSTVTFECAVRSSVKSLKDDITARMELLISEFGGKLDLISDYPAWEYAKGSELEKICVKAFENINGKEPIIMALHAGLECGLLLDKIPNAEAISFGPNMYDVHTPNEHLSISSTDNTWKYLLEILKSMK	Peptidase M20/M25/M40 family protein	Paeniclostridium sordellii ATCC 9714	264	domain (1)
7	12.7	12.7	47.26	47.26	47.26	tr|T0DW21|T0DW21_CLOSO	Uncharacterized protein OS=Paeniclostridium sordellii ATCC 9714 GN=H477_3327 PE=4 SV=1	CLOSO	9				ORF Names: H477_3327								Complete proteome; Reference proteome														predicted							T0DW21	T0DW21_CLOSO	not reviewed	MYDNNIYNDIYIDKKINLIEVLNDMLIYSKEKPYISKDLYDFIELLKFEKLNDINGFDENDLDNARQNNYVWSMAELEDYIYVGTGRNVLLQYLYRVAPNIDLSLDWMPNKIDNSAEIWRYKKDKSLPWQKVYKATKDSGIDDLDL	Uncharacterized protein	Paeniclostridium sordellii ATCC 9714	146
8	12.52	12.55	63.21	63.21	61.32	tr|T0E0I6|T0E0I6_CLOSO	Uncharacterized protein OS=Paeniclostridium sordellii ATCC 9714 GN=H477_1422 PE=4 SV=1	CLOSO	16				ORF Names: H477_1422								Coiled coil; Complete proteome; Reference proteome														predicted							T0E0I6	T0E0I6_CLOSO	not reviewed	MSCKNNVWKGYKCIENQKWDNVCYYKCKDNGCGSKKCKAEIKDAKDLIDDAKDTNNMLGKDLKEALENQNAAKEGIKGLEDNLLNLACDLSDIKKALSNAVKNEII	Uncharacterized protein	Paeniclostridium sordellii ATCC 9714	106	coiled-coil region (1)
9	12.45	12.53	43.29	34.15	26.52	tr|T0CNF5|T0CNF5_CLOSO	Hsp70 family protein OS=Paeniclostridium sordellii ATCC 9714 GN=H477_2996 PE=3 SV=1	CLOSO	7			ATP binding	ORF Names: H477_2996			Belongs to the heat shock protein 70 family.					ATP-binding; Coiled coil; Complete proteome; Nucleotide-binding; Reference proteome														inferred from homology	IPR018181; IPR013126						T0CNF5	T0CNF5_CLOSO	not reviewed	MGKIIGIDLGTTNSCVAVLEGGEPQIIPNSEGMRTTPSVVAFTKDGERIVGEPAKRQAVTNADRTIISIKTHMGTDYKVNIDGKEYSPQEISAIILQKLKADAESYLGQTVTEAVITVPAYFTDAQRQATKDAGRIAGLDVKRIINEPTAAALAYGMDKLDQEKKILVFDLGGGTFDVSVLEIGDGTFEVLATAGNNRLGGDDFDQVIIDYLAEEFKKTEGVDLRNDKMALQRLKEAAEKAKKELSSTMSTNINLPFITATAEGPKHLNIDLSRAKFDELTANLVEKTMEPTRRALQDAGLSTSEIDDVLLVGGSTRIPAVQEALRNS	Hsp70 family protein	Paeniclostridium sordellii ATCC 9714	328	coiled-coil region (1)
10	11.29	11.35	25.64	25.64	25.64	tr|T0E9M9|T0E9M9_CLOSO	Pyruvate flavodoxin/ferredoxin oxidoreductase, thiamine diP-bdg family protein OS=Paeniclostridium sordellii ATCC 9714 GN=H477_1151 PE=4 SV=1	CLOSO	7			oxidoreductase activity	ORF Names: H477_1151								Complete proteome; Pyruvate; Reference proteome														predicted	IPR033412; IPR002880; IPR029061; IPR009014						T0E9M9	T0E9M9_CLOSO	not reviewed	MIPNMYKVAGELLPGVFHVSARALASQALSIFGDHQDVMSARQTGCVLLASGSVQEVADIAPVAHLAAIEGRLPFIHFFDGFRTSHEIQKVELLENEDYAKLLNMEAVQEFRNRALSPNHPVTRGTAQNPDIYFQTREASNKYYNDIVGIVEKYMNQMSELTGRKHGLFDYYGAEDAKYVIVAMGSVTEAIEETIDVLNAQGEKYGLVKVHLYRPFSMKHFMDSMPSTVERICVLDRTKEPGATGEPLYLDVKSVYYGNEKAPMVIGGRYGLGSKDTTPTQIKTVYDNLKSETPKDQFTLGIVDDVTNTSLN	Pyruvate flavodoxin/ferredoxin oxidoreductase, thiamine diP-bdg family protein	Paeniclostridium sordellii ATCC 9714	312	domain (2)
11	9.44	9.44	33.94	33.94	33.94	tr|T0D341|T0D341_CLOSO	(R)-2-hydroxyglutaryl-CoA dehydratase subunit alpha OS=Paeniclostridium sordellii ATCC 9714 GN=hgdA PE=4 SV=1	CLOSO	7			lyase activity	hgdA (orf: H477_0353)								Complete proteome; Lyase; Reference proteome														predicted	IPR010327						T0D341	T0D341_CLOSO	not reviewed	MIMIDVPFNNEDHVTDERVEYIKAQFEEAIKELEKISGKKFDPKKFEEVMKISAENGRLWKYSMSLPEGSDPSPMNGFDLFTYMAVIVCARGKKETTEAFKILIEELEENKKNKISTFRGEEKYRIMMEGIPCWPTIGFKMKTLAKYGVNMTGSVYPHAWALQYEVNDLDGMARAYSGMFNNVNLDKMTEFRVNSLRDGKCDGAFYHMNRSCKLMSLIQYEMQRQTEEITKIPSAGFDGDQADPRAFTKAQFETRIQGLVEVMEERKNLNRGEI	(R)-2-hydroxyglutaryl-CoA dehydratase subunit alpha	Paeniclostridium sordellii ATCC 9714	274
12	8.51	8.52	66.22	66.22	66.22	tr|T0CMC7|T0CMC7_CLOSO	Uncharacterized protein OS=Paeniclostridium sordellii ATCC 9714 GN=H477_1423 PE=4 SV=1	CLOSO	12				ORF Names: H477_1423								Coiled coil; Complete proteome; Reference proteome														predicted							T0CMC7	T0CMC7_CLOSO	not reviewed	MIKDLNQILPDQQNAIEDIKDAKDKQKEVKGILDKLNKALDDVVDCLSERGSNPILIPWDEDCDKHPCKNDCDC	Uncharacterized protein	Paeniclostridium sordellii ATCC 9714	74	coiled-coil region (1)
13	8.43	8.46	40.39	40.39	39.41	tr|T0DRL7|T0DRL7_CLOSO	Uncharacterized protein OS=Paeniclostridium sordellii ATCC 9714 GN=H477_2973 PE=4 SV=1	CLOSO	7				ORF Names: H477_2973								Complete proteome; Reference proteome														predicted	IPR021328						T0DRL7	T0DRL7_CLOSO	not reviewed	MLESKLRSGNNPNVSENLINYVNQLNNNSKLLINGLISFKERLLNGVLSCNLFTGNYPLLIEHILREAKLYLSLVQDLENRVDIETKSNKETELFWDQIMMEHALFIRGLLDPSENELIDTADEFADDFEDLIKEARNMTDATINNMTDETLEKTIELKNFKQAGTEGIASCKIRSIILPLLADHVLREANHYIRILQAYKNQ	Uncharacterized protein	Paeniclostridium sordellii ATCC 9714	203
14	8	8	37.02	37.02	35.91	tr|T0EAX3|T0EAX3_CLOSO	Reverse rubrerythrin-1 OS=Paeniclostridium sordellii ATCC 9714 GN=H477_0314 PE=4 SV=1	CLOSO	4			iron ion binding; NADH peroxidase activity	ORF Names: H477_0314			Contains 1 ferritin-like diiron domain.					Complete proteome; Oxidoreductase; Peroxidase; Reference proteome														predicted	IPR009040; IPR009078; IPR012347; IPR024934; IPR004039; IPR003251						T0EAX3	T0EAX3_CLOSO	not reviewed	MKKFVCTICGYIHEGEMPPEVCPVCKAPASKFEEMKGEMAWADEHRIGVAQGVDEEILEGLRANFTGECTEVGMYLAMSRQADREGFPEVAEAYKRIAFEEAEHAAKFAELLGEVVVADTQANLKARVEAEYGATDGKLKLAKKAKELGLDAIHDTVHEMCKDEARHGKAFLGLLNRHFGK	Reverse rubrerythrin-1	Paeniclostridium sordellii ATCC 9714	181	domain (2)
15	7.84	7.92	19.94	16.13	13.49	tr|T0E6E7|T0E6E7_CLOSO	Acyl-CoA dehydrogenase, N-terminal domain protein OS=Paeniclostridium sordellii ATCC 9714 GN=H477_0355 PE=3 SV=1	CLOSO	4			acyl-CoA dehydrogenase activity; flavin adenine dinucleotide binding	ORF Names: H477_0355			Belongs to the acyl-CoA dehydrogenase family.					Complete proteome; FAD; Flavoprotein; Oxidoreductase; Reference proteome														inferred from homology	IPR006089; IPR006091; IPR009075; IPR013786; IPR009100						T0E6E7	T0E6E7_CLOSO	not reviewed	MIFNKEQELLRKAVRDFVSREMATLPEEIDKTGEMPRELLDKMAQTKYTSVTIPQEYGGAGADYVSYAIIMEELSRRCASTGTYATAAASLVSLPILNYGTEEQKQKYLRGIASGEMIGAFGLTEPGAGSDASAQQTTAELDGDYYILNGRKTFITNAPICDFAIVIAVTDRSKGLKGTTAFIVESNLEGFSHGAHEDKMGIRGTQTSDLIFENVKVPKENLLGKEGIGFKIAMKTLDAGRIGVAAQALGVAQGALDEAIKYTKERVQFGKTLSKFQNTQFTLADMETKVNAARWLVYDAAQKKDAGMNMTKESAMAKYYAAEIANEVAYKALNYMVDMDL	Acyl-CoA dehydrogenase, N-terminal domain protein	Paeniclostridium sordellii ATCC 9714	341	domain (3)
16	7.5	7.72	49.28	49.28	31.65	tr|T0CR24|T0CR24_CLOSO	Uncharacterized protein OS=Paeniclostridium sordellii ATCC 9714 GN=H477_2788 PE=4 SV=1	CLOSO	11				ORF Names: H477_2788								Complete proteome; Reference proteome														predicted							T0CR24	T0CR24_CLOSO	not reviewed	MAKESMENECEADKLRKQANDLLCRSEELCEKAKCLYKEAERAGNDAEKFCEKAKCLFEKAQNENEQAKCLFSQAMKCDEKAMNCYKVAGEKIKEYEDKSNKCEDMMKKCKDKIKGCHDMDVCKTMKKTCYVDLGMNEPCKSKCSYVKPATKCEKKMKPSCDCEVKYVCPTHKEMPKKEIKQKCEYEYYDMNDCYFEKDEYCDLDDIMLMKEEETGLYINPIYNMEPMQYMGNFASKYPCMEEPYMNMEQMEMNDMQDMWMNYYMYMQNMMKNMMGKM	Uncharacterized protein	Paeniclostridium sordellii ATCC 9714	278
17	7.18	7.32	39.18	34.29	24.9	tr|T0D415|T0D415_CLOSO	TCP-1/cpn60 chaperonin family protein OS=Paeniclostridium sordellii ATCC 9714 GN=H477_0241 PE=4 SV=1	CLOSO	4			ATP binding	ORF Names: H477_0241								Complete proteome; Reference proteome														predicted	IPR017998; IPR002423; IPR027409; IPR027413						T0D415	T0D415_CLOSO	not reviewed	MAKEIKFAQESRSALEAGVNKLADTVKVTLGPKGRNVILDKKFGAPLITNDGVTIAKEIELEDRFENMGAQLVKEVATKTNDVAGDGTTTATVLAQAIIREGLKNVTAGSNPVLLRKGIQKAVEVSVDELKKQSRTIETKESISQVASISAGDEEVGNLIAEAMEIVGKDGVITVEESKTMHTELDAVEGMQFDRGFVSAYMVTDVDKMEAVLNDPYILITDRKITNIQDILPVLEQIVQQGKNY	TCP-1/cpn60 chaperonin family protein	Paeniclostridium sordellii ATCC 9714	245
18	6.63	6.67	17.88	17.88	12.85	tr|T2RFG7|T2RFG7_CLOSO	Uncharacterized protein OS=Paeniclostridium sordellii ATCC 9714 GN=H477_4384 PE=4 SV=1	CLOSO	3				ORF Names: H477_4384								Complete proteome; Reference proteome														predicted							T2RFG7	T2RFG7_CLOSO	not reviewed	MERNYWQEYWDNYCKFMAVYLTELQNAYPDADIKNEYVEVANLFEPAMPLEYYENFDEYEDIDNDPERENDPPVGAQSIAPFIFPGGGQQSISPGGGQQSPTPFISPGGGQFTINNCRRVAIVRIVMRRGFTPSNFFMAVDRADNRSIQGFRIACESGRIRFVPMAVEYRNINFIECAF	Uncharacterized protein	Paeniclostridium sordellii ATCC 9714	179
19	6.46	6.51	35.64	35.64	26.73	tr|T0EEI8|T0EEI8_CLOSO	Uncharacterized protein OS=Paeniclostridium sordellii ATCC 9714 GN=H477_5698 PE=4 SV=1	CLOSO	7			integral component of membrane	ORF Names: H477_5698								Complete proteome; Membrane; Reference proteome; Transmembrane; Transmembrane helix														predicted							T0EEI8	T0EEI8_CLOSO	not reviewed	MIGNNMYMSCCEHGKGKSLCEYGKGNGLNEYYPPESHIECCCKPSMKKALELLSCEGIRENVNFDAFAFITDFYVVGSPLVFLSLLPATKKITYQLHLMLL	Uncharacterized protein	Paeniclostridium sordellii ATCC 9714	101	transmembrane region (1)
20	6.07	6.08	24.21	20.24	20.24	tr|T0D2M7|T0D2M7_CLOSO	Putative peptidoglycan binding domain protein OS=Paeniclostridium sordellii ATCC 9714 GN=H477_0372 PE=4 SV=1	CLOSO	3				ORF Names: H477_0372								Complete proteome; Reference proteome														predicted	IPR002477						T0D2M7	T0D2M7_CLOSO	not reviewed	MPEDKNAPNYWVYFKDYIKNVASSEIYSTWPTETIFANIIAIISFTLNRVFTEWYRSKGYNFTITSTTAFDHKYIHERNVFDTISVVVDEIFNTFIKRPPTARQPLLAQYCDGVKSQCPGQMTQWGSKDLGDQGLSYEEILRSFYGEGIVFEKAPVVSGVPVSFPGEVLQIGSKGKDVQTVQNQLNAISNAYPAIPKVREDGIFGDALANSIKEFQGIFGLPKSGVVDFKTWYELSRIYVAVTKIASLNPTI	Putative peptidoglycan binding domain protein	Paeniclostridium sordellii ATCC 9714	252	domain (1)
21	6	6	15.69	15.69	15.69	tr|T2RDU1|T2RDU1_CLOSO	ATP synthase subunit beta, sodium ion specific OS=Paeniclostridium sordellii ATCC 9714 GN=atpD PE=4 SV=1	CLOSO	3			ATP binding; hydrolase activity; ATP metabolic process; proton transport	atpD (orf: H477_4865)								Complete proteome; Hydrolase; Reference proteome														predicted	IPR003593; IPR004100; IPR000194; IPR027417						T2RDU1	T2RDU1_CLOSO	not reviewed	MANLGKIVQVIGPVVDVKFNDEKSLPNLLNALEIKHGDKKIVIEVAQHVGDDTVRCISMSSTDGLVRGMEVVDTGAAISVPVGDETLGRIFNVLGEPVDGKAAPKDAPKSPIHREAPAFDELKPGVEILETGIKVVDLLAPYLKGGKIGLFGGAGVGKTVLIQELINNIATQHGGISVFAGVGERTREGNDLYGEMSESGVINKTALVFGQMNEPPGARMRVALTGLTMAEYFRDQEGQDVLLFVDNIFRFTQAGSEVSALLGRTHQQLDTNQH	ATP synthase subunit beta, sodium ion specific	Paeniclostridium sordellii ATCC 9714	274	domain (1)
22	6	6	13.1	13.1	13.1	tr|T0EB97|T0EB97_CLOSO	CO dehydrogenase/acetyl-CoA synthase complex beta subunit OS=Paeniclostridium sordellii ATCC 9714 GN=H477_0479 PE=4 SV=1	CLOSO	3			carbon-monoxide dehydrogenase (acceptor) activity; acetyl-CoA metabolic process	ORF Names: H477_0479								Complete proteome; Reference proteome														predicted	IPR004461; IPR011254; IPR016099						T0EB97	T0EB97_CLOSO	not reviewed	MNNLGDLEAALEIIESLINKTHLLEHVFNSGLATALAAEVIEAIKYSTCDAPYSEPCAGHITDPIIRSLGVPLVTGDIPGVAVVLGECPDAETSAKIIKDYQSKGLLTFLVGKVIDQAIEAGVKMGLELRVIPLGYDVTSVIHVVSVAVRAALIFGNLTPGDLEGLLTYTAKRVPAFVNAFGPLSDLVVSCGAGAIALGFPVITDQDVLEVPMNLLTQKDYDKFVATSLEARGIKIKVTEIPIPVSFAAAFEGERIRKNDMYAEFGGNKTEAWELVRKREISEVEDHKIEIIGKDIDEIDAVNGVVRLPLAVIVDIAGKNMQEDFEPVLERRYTTS	CO dehydrogenase/acetyl-CoA synthase complex beta subunit	Paeniclostridium sordellii ATCC 9714	336
23	6	6	24.58	24.58	24.58	tr|T0CQV5|T0CQV5_CLOSO	30S ribosomal protein S2 OS=Paeniclostridium sordellii ATCC 9714 GN=rpsB PE=3 SV=1	CLOSO	3			small ribosomal subunit; structural constituent of ribosome; translation	rpsB (orf: H477_2728)			Belongs to the ribosomal protein S2P family.					Complete proteome; Reference proteome; Ribonucleoprotein; Ribosomal protein														inferred from homology	IPR001865; IPR005706; IPR018130; IPR023591						T0CQV5	T0CQV5_CLOSO	not reviewed	MSVISMKQLLEAGVHFGHQTRRWNPKMAQYIFTERNGIYIIDLQKTVKKVEEAYRFTKEIAETGKPILFVGTKKQAQEAIKEEAERCGMFYVNERWLGGMLTNHKTIKTRIDKLRKLEKMEEEGVFNVLPKKEVIKLRAEKEKLEKYLNGIKDMPELPAAIFVVDPRKENIAIQEAHRLGIPVIGIVDTNCDPEQLDFAIPGNDDAIRAVKLITGAMATAIIEGRQAIADDQEEVTEDQE	30S ribosomal protein S2	Paeniclostridium sordellii ATCC 9714	240
24	6	6	14.2	14.2	14.2	tr|T0CM84|T0CM84_CLOSO	Tryptophanase 2 OS=Paeniclostridium sordellii ATCC 9714 GN=tnaA2 PE=4 SV=1	CLOSO	3			tryptophanase activity; cellular amino acid metabolic process	tnaA2 (orf: H477_3251)								Complete proteome; Lyase; Reference proteome														predicted	IPR001597; IPR015424; IPR015421; IPR015422						T0CM84	T0CM84_CLOSO	not reviewed	MPEALDTVKYAPFKGNMDVARMENLINEFGPENVGVIIMTVTNNTAGGQPVSMKNMRETYKVAKKYNIPVLIDAARYAENAYFIKTREVGYEDKTIKEIVREMFSYGDMMTMSSKKDAIVNMGGLIGIKDDEELYDNIKARTISFEGFVSYGGLAGRDLEALAVGLYEGIDYDYLRYRIGQMEYIANRLDEAEIAYQSPVGGHAIFIDAKKLLPHIPYYQFPAQALAIELYKEAGIRSCDIGSYMLDNDPVTGEQRQSELELTRLAVPRRVYTQAHLDVIVDALISIKERASEINGYEITWQPKVLRHFTSKLKPVK	Tryptophanase 2	Paeniclostridium sordellii ATCC 9714	317	domain (1)
25	5.92	6	24.31	24.31	24.31	tr|T2RGS3|T2RGS3_CLOSO	Uncharacterized protein OS=Paeniclostridium sordellii ATCC 9714 GN=H477_3966 PE=4 SV=1	CLOSO	3				ORF Names: H477_3966								Complete proteome; Reference proteome														predicted							T2RGS3	T2RGS3_CLOSO	not reviewed	MHKKCDNKYCNINQCSSKYHYCDTFNEPEPVTPKFFFYPCEIDLYNNLKNCLCKTVGFKLSCSDCILRLKIMKVTPCSVYGKTSSGKGPICLKLSAIDYVDFGKEVYVNPLCNVNISEILTLPGSKGEKGEPGPQGPKGGFSRS	Uncharacterized protein	Paeniclostridium sordellii ATCC 9714	144
26	5.59	5.68	19.28	19.28	19.28	tr|T0CTM7|T0CTM7_CLOSO	Peptidase M20/M25/M40 family protein OS=Paeniclostridium sordellii ATCC 9714 GN=H477_0436 PE=4 SV=1	CLOSO	3			hydrolase activity; proteolysis	ORF Names: H477_0436								Complete proteome; Reference proteome														predicted	IPR002933; IPR001160						T0CTM7	T0CTM7_CLOSO	not reviewed	MNNVLSDLQPSLVFKYFEEISQIPRGSKNEKAISDYLRNFGEGLGLETIQDESLNIIIRKPATPGYENAPGVVLQGHMDMVCEKNKSTNHDFMKDPIELRIDGDYVYANNTTLGADNGIAVAMGLAILASNDIPHPALEVLLTVDEEAGMTGAMALDGSLIKENTY	Peptidase M20/M25/M40 family protein	Paeniclostridium sordellii ATCC 9714	166
27	4.71	4.75	16.06	16.06	12.45	tr|T0CXE2|T0CXE2_CLOSO	Metallopeptidase M24 family protein OS=Paeniclostridium sordellii ATCC 9714 GN=H477_5622 PE=4 SV=1	CLOSO	3				ORF Names: H477_5622								Complete proteome; Reference proteome														predicted	IPR000994; IPR001714						T0CXE2	T0CXE2_CLOSO	not reviewed	MDLCKNCKFVNSSYIVDTLRSSKDEEEKDLMRKASALNDEAMKILKSIISDDLTEKQLANKLAGIYEDLGADGFSFSPIIGFGPNGADPHGTPGDRKVKVGDSIILDIGCVKDNYCSDMTRTVFYKEAPEKAKEIFEIVLEANKRAIALVKPGVRFCDIDAAARDYITEKGYGKYFTHRTGHSIGLECHDMGDVSSVNTDCVEEGMIFSVEPGIYLPGEFGVRIEDLVLVTKDGHEVLNKHVKELSIVG	Metallopeptidase M24 family protein	Paeniclostridium sordellii ATCC 9714	249	domain (1)
28	4.65	4.7	14.83	14.83	12.07	tr|T0D3J0|T0D3J0_CLOSO	Pyruvate formate lyase family protein OS=Paeniclostridium sordellii ATCC 9714 GN=H477_0509 PE=4 SV=1	CLOSO	3			lyase activity	ORF Names: H477_0509								Coiled coil; Complete proteome; Lyase; Pyruvate; Reference proteome														predicted	IPR004184						T0D3J0	T0D3J0_CLOSO	not reviewed	MPFGGIRMVETSCDAYGYKLNPEISEIFTKYRKTHNQGVFDAYTPDMRAARSAGIITGLPDAYGRGRIIGDYRRVALYGVDKLIQDKLDQKATLEVRCIDEDVIRLREELSDQIKALEALKRMAESYGFDISKPATNAKEAVQWTYFGYLGAVKDQNGAAMSLGRVSTFLDIYFERDLAAGVLTEEEAQEIMDHFVMKLRMVRFLRTPEYNDLFSGDPTWVTESIGGMGLDGRTLVTKNSFRMLNTLYTLGPSPEPNLTVLWSTQLPEGFKNFCSKVSIDTSSVQTRTMI	Pyruvate formate lyase family protein	Paeniclostridium sordellii ATCC 9714	290	domain (1); coiled-coil region (1)
29	4.61	4.64	53.62	53.62	53.62	tr|T0DR76|T0DR76_CLOSO	Manganese containing catalase family protein OS=Paeniclostridium sordellii ATCC 9714 GN=H477_3486 PE=4 SV=1	CLOSO	3				ORF Names: H477_3486								Complete proteome; Reference proteome														predicted	IPR009078; IPR012347; IPR007760						T0DR76	T0DR76_CLOSO	not reviewed	MGNPVTDLHEDMAAEQKALATYYQLVNLTDDVDIKNVLRFLGEREIIHYQRFGEALMDVYDYQEQKQMF	Manganese containing catalase family protein	Paeniclostridium sordellii ATCC 9714	69
30	4.47	4.5	55.93	50.85	44.92	tr|T0DWI1|T0DWI1_CLOSO	Manganese containing catalase family protein OS=Paeniclostridium sordellii ATCC 9714 GN=H477_3485 PE=4 SV=1	CLOSO	4				ORF Names: H477_3485								Complete proteome; Reference proteome														predicted	IPR009078; IPR012347; IPR007760						T0DWI1	T0DWI1_CLOSO	not reviewed	MWIYQKTLEHPVNLKSKDLKMAKFLITQFGGPNGELAAAVRYLSQRFTMPTGKSKALLTDIGTEELAHVEMIASMVYQLTKDATPEELRKAGLGENYAQNGFGIFPSDAMEFLSQLVQ	Manganese containing catalase family protein	Paeniclostridium sordellii ATCC 9714	118
31	4.31	4.34	17.95	17.95	17.95	tr|T0CLP4|T0CLP4_CLOSO	Uncharacterized protein OS=Paeniclostridium sordellii ATCC 9714 GN=H477_3325 PE=4 SV=1	CLOSO	6				ORF Names: H477_3325								Complete proteome; Reference proteome														predicted							T0CLP4	T0CLP4_CLOSO	not reviewed	MGVYKEHLYVGATMELSNITSFITPKGCDVIRIDKNDNWQLIVGGEPLIATKPSVGERGKSLSGLMSGFNNPLNVYAWQIKEHDGKLLIGTLDHGITMEPVLEICIKNKELLRYLLEKRGIKVSPEEIIEQLEITIKKLKEIDYPYGFDLYTSKDGINFKPCIYKGLGNKQNYGSRILYVEMKINYILELQILTKVVKFGENEKLNYLTTLMMNFSIVIFSVRISNVNVIKIFY	Uncharacterized protein	Paeniclostridium sordellii ATCC 9714	234
32	4.1	4.22	10.54	10.54	7.831	tr|T0D119|T0D119_CLOSO	Thiamine pyrophosphate enzyme, C-terminal TPP binding domain protein OS=Paeniclostridium sordellii ATCC 9714 GN=H477_1149 PE=4 SV=1	CLOSO	2			catalytic activity; thiamine pyrophosphate binding	ORF Names: H477_1149								Complete proteome; Reference proteome														predicted	IPR029061; IPR011766						T0D119	T0D119_CLOSO	not reviewed	MKPLDTQEVEVENWAFAVDTKKVAPKGDIMAPTTVKGSQFRQPLIEFSGACAGCGETPYIKLVTQLFGDRMMIANATGCSSIWGGSAPSTPYTVNHEGKGPSWANSLFEDNAEYGYGMFLGVKQMRAKLTETMEQLVSMDICDAARDAFNNWLENKEDSEASVKASEKVLEVLANAHEIENAEIKALVAEIEARKDYLVKRSQWILGGDGWAYDIGYGGLDHVLASGENVNVLVFDTEIYSNTGGQASKSTPVAAMAKFAAAGKRSRKKDLGMMAMSYGNVYVAQVGMGADKNQLMKAVVEAEKYDGPSLIIAYSPCISHGLKKVWEELKLT	Thiamine pyrophosphate enzyme, C-terminal TPP binding domain protein	Paeniclostridium sordellii ATCC 9714	332	domain (1)
33	4.1	4.11	44.21	35.79	21.05	tr|T0EB82|T0EB82_CLOSO	Prismane/CO dehydrogenase family protein OS=Paeniclostridium sordellii ATCC 9714 GN=H477_0454 PE=4 SV=1	CLOSO	2			4 iron, 4 sulfur cluster binding; carbon-monoxide dehydrogenase (acceptor) activity; nickel cation binding; generation of precursor metabolites and energy	ORF Names: H477_0454								Complete proteome; Oxidoreductase; Reference proteome														predicted	IPR016101; IPR004137; IPR011254						T0EB82	T0EB82_CLOSO	not reviewed	MDKKMLTIDLNSQKLIEKAERDGVETMYDRKLAMKAQCGFGLQGVCCRICAAGPCRITPKTPLGLCGADEHVIVGRNFARMVAAGTAAHQTMLEV	Prismane/CO dehydrogenase family protein	Paeniclostridium sordellii ATCC 9714	95
34	4	4	8.434	8.434	6.928	tr|T2RCI7|T2RCI7_CLOSO	Multiple substrate aminotransferase OS=Paeniclostridium sordellii ATCC 9714 GN=H477_5144 PE=4 SV=1	CLOSO	2			pyridoxal phosphate binding; transaminase activity; biosynthetic process	ORF Names: H477_5144								Aminotransferase; Complete proteome; Reference proteome; Transferase														predicted	IPR004839; IPR015424; IPR015421; IPR015422						T2RCI7	T2RCI7_CLOSO	not reviewed	MKEISRLVLEESGREALQYTTTEGFGPLREQIAERMNRKLKTSVSKDDLLITSGSQQGLDFAGKIFLNEGDVVLVESPSYLGALNAFKAYCPKFIEVPTDKDGMIIEELEKILETTENVKMIYVIPDFQNPTGKTWSMDRRKKFMDVINKFEIPVVEDNPYGELRFEGEILPSLKGMDEKGLVIFLGSFSKIFCPGYRIGWVCASPEILSKFVFVKQGADLQASTISQREVSKFIDVYDLDAHVEKIKTVYKKRRDLMLSTIDECFPEVVEHTYPEGGLFTWVELPKHLDARKIMEKCLENNVAYVPGGSFFPNGGKENTFRLNYSNMPMKK	Multiple substrate aminotransferase	Paeniclostridium sordellii ATCC 9714	332	domain (1)
35	4	4	16.29	16.29	16.29	tr|T2RFA8|T2RFA8_CLOSO	Carbamoyl-phosphate synthase L chain, ATP binding domain protein OS=Paeniclostridium sordellii ATCC 9714 GN=H477_4284 PE=4 SV=1	CLOSO	2			ATP binding; biotin carboxylase activity; metal ion binding	ORF Names: H477_4284								Complete proteome; Reference proteome														predicted	IPR011761; IPR013816; IPR011764; IPR005482; IPR005479; IPR011054						T2RFA8	T2RFA8_CLOSO	not reviewed	MQRRNQKVIEESLSHYLDEAQRKKLYDTSIAVIKGIGYLGAGTIEFIVDKDKNFYFIEMNTRIQVEHPITEMITGIDLIKLQLLIASGEKIPFKQENVKFRGHAIECRINAEDSENDFKPSPGKVESLHIPGGFGVRFDTFIYPGYTIPPIYDSMLGKLICIADTRDECISRMDRALDEIIIEGITSNIEFQRSLINSDEFKNNTHHTKFIETSFIKSLNA	Carbamoyl-phosphate synthase L chain, ATP binding domain protein	Paeniclostridium sordellii ATCC 9714	221	domain (2)
36	4	4	14	14	14	tr|T2RCT6|T2RCT6_CLOSO	M42 glutamyl aminopeptidase family protein OS=Paeniclostridium sordellii ATCC 9714 GN=H477_4964 PE=4 SV=1	CLOSO	2			aminopeptidase activity; metallopeptidase activity	ORF Names: H477_4964								Aminopeptidase; Complete proteome; Hydrolase; Protease; Reference proteome														predicted	IPR001261; IPR007484						T2RCT6	T2RCT6_CLOSO	not reviewed	MINKQRLIDEFIELVKIDSPSSKEGNVAKTLVKKLEAIGCEVCIDEAGVRAGGETGNVIAKLKGNREGKTVLFSSHMDTVSPGEGIKPIIDEATGIIKSDGTTVLGSDDKAGIAAILEALRIIKENNIDHADIEVVFSIWEEGGLFGLNI	M42 glutamyl aminopeptidase family protein	Paeniclostridium sordellii ATCC 9714	150	domain (1)
37	4	4	29.85	29.85	29.85	tr|T0EC29|T0EC29_CLOSO	Putative ferredoxin/flavodoxin oxidoreductase,beta subunit OS=Paeniclostridium sordellii ATCC 9714 GN=H477_0138 PE=4 SV=1	CLOSO	2				ORF Names: H477_0138								Complete proteome; Reference proteome														predicted	IPR029061						T0EC29	T0EC29_CLOSO	not reviewed	MAPTTLLGQKATTAQSGRDINVQGAPIRMAEMLGTLDRAVFVERVSVDTPANVRKAKKAIKKLLKFN	Putative ferredoxin/flavodoxin oxidoreductase,beta subunit	Paeniclostridium sordellii ATCC 9714	67
38	4	4	26.47	26.47	26.47	tr|T0E6D8|T0E6D8_CLOSO	Uncharacterized protein OS=Paeniclostridium sordellii ATCC 9714 GN=H477_1876 PE=4 SV=1	CLOSO	2				ORF Names: H477_1876								Complete proteome; Reference proteome														predicted	IPR025510						T0E6D8	T0E6D8_CLOSO	not reviewed	MDCFKTKDGNSIVRVFHASPNAPGVDVYIDNVLTLSDLKFTNLSDYTYLEEGLHKIDIHPAGDANTIVLSKMVDVPDDRIFTIAAVGNLNDLELMLIEDDIDEIPSTKEATFRVVHLSPNAPKVDVLANGNSIFENLGFKGNTDYIKVPSNSYDIDVVSSDSKDKVLSNKINLKANRIYTIYVVGNPPNLSLIQAVDVNSYLCR	Uncharacterized protein	Paeniclostridium sordellii ATCC 9714	204	domain (2)
39	4	4	69.35	69.35	69.35	tr|T0CFK2|T0CFK2_CLOSO	Putative membrane protein OS=Paeniclostridium sordellii ATCC 9714 GN=H477_2616 PE=4 SV=1	CLOSO	2			integral component of membrane	ORF Names: H477_2616								Complete proteome; Membrane; Reference proteome; Signal; Transmembrane; Transmembrane helix					1 22									predicted							T0CFK2	T0CFK2_CLOSO	not reviewed	MKKGMVPIVLGAAVTTAGLALDAKQNKNHKFKKNDYKNMAGALLVGAGVAHIALGSIDRARY	Putative membrane protein	Paeniclostridium sordellii ATCC 9714	62	signal peptide (1); chain (1); transmembrane region (1)
40	3.86	3.97	10	7.273	7.273	tr|T0E668|T0E668_CLOSO	Pyruvate formate lyase family protein OS=Paeniclostridium sordellii ATCC 9714 GN=H477_1816 PE=4 SV=1	CLOSO	2			lyase activity	ORF Names: H477_1816								Complete proteome; Lyase; Pyruvate; Reference proteome														predicted	IPR004184						T0E668	T0E668_CLOSO	not reviewed	MALFKKERDNGGTLDVDTKTVSAIDAYKPGYMDKEKEVIVGFQTDEPLKRAIMPYGGIRMVESSCKAYGFELDKDVKEIFTKYRKTHNQGVFDAYTDEMRAARRSGIITGLPDAYGRGRIIGDYRRVALYGVDRLIEDKISQKSSLDVSVIDEDTIRLREEISDQIKALEALKRMAESYGFDISRPANNSREAVQWLYFAYLGAIKDQNGAAMSLGRTSTFLDIYFERDLKNGEITEEEVQELMDHFVMKLRMVKFLRTPEYNDLFSGDPTWVTESIGGMGIDGRTLVTKNSFRVLHTLYTLGPSPEPNLTFYGQILYQKDLKTFALKFQ	Pyruvate formate lyase family protein	Paeniclostridium sordellii ATCC 9714	330	domain (1)
41	3.8	3.98	28.33	28.33	19.17	tr|T0CV21|T0CV21_CLOSO	50S ribosomal protein L7/L12 OS=Paeniclostridium sordellii ATCC 9714 GN=rplL PE=3 SV=1	CLOSO	4			ribosome; structural constituent of ribosome; translation	rplL (orf: H477_0034)			Belongs to the ribosomal protein L7/L12P family.		Forms part of the ribosomal stalk which helps the ribosome interact with GTP-bound translation factors. Is thus essential for accurate translation.			Complete proteome; Reference proteome; Ribonucleoprotein; Ribosomal protein														inferred from homology	IPR000206; IPR014719; IPR013823; IPR008932						T0CV21	T0CV21_CLOSO	not reviewed	MTIEQILEAIENMKVLELNELVKAAEEKFGVSASAPVMMAGAVAGGAAEEKTEFDVVLASAGSSKVGVIKAVREITGLGLKEAKELVDNAPKTLKEGVSKDEADQMKEKLEAAGASVEVK	50S ribosomal protein L7/L12	Paeniclostridium sordellii ATCC 9714	120	domain (2)
42	3.16	3.33	18.58	18.58	18.58	tr|T0D4U1|T0D4U1_CLOSO	50S ribosomal protein L17 OS=Paeniclostridium sordellii ATCC 9714 GN=rplQ PE=3 SV=1	CLOSO	2			ribosome; structural constituent of ribosome; translation	rplQ (orf: H477_0088)			Belongs to the ribosomal protein L17P family.					Complete proteome; Reference proteome; Ribonucleoprotein; Ribosomal protein														inferred from homology	IPR000456						T0D4U1	T0D4U1_CLOSO	not reviewed	MAKYRKLGRVTAHRNLMLRNLVTDLLRNGKIETTVTRAKETRRMAEKMITLAKRGDLHARRQVLAYVLDETVVNNLFTDIAPKYAERNGGYTRIIKIGPRRGDAAEMALIELV	50S ribosomal protein L17	Paeniclostridium sordellii ATCC 9714	113
43	3.13	3.25	12.1	12.1	12.1	tr|T0E826|T0E826_CLOSO	S4 domain protein OS=Paeniclostridium sordellii ATCC 9714 GN=H477_0085 PE=4 SV=1	CLOSO	2			intracellular; rRNA binding	ORF Names: H477_0085								Complete proteome; Reference proteome														predicted	IPR022801; IPR018079; IPR002942						T0E826	T0E826_CLOSO	not reviewed	MPGIAGENLLSLLERRLDNVVYRMGLASSRKEARQLVRHGHFTLNGHKVDIPSLTVVNGDVIAVKETSKSSAKFKGLVESNSRIAPKWLDANLENMTASVVANPGREDIDLEIAEHLIIELYSK	S4 domain protein	Paeniclostridium sordellii ATCC 9714	124	domain (1)
44	3.11	3.24	14.79	14.79	14.79	tr|T0D7A9|T0D7A9_CLOSO	Uncharacterized protein OS=Paeniclostridium sordellii ATCC 9714 GN=H477_5566 PE=4 SV=1	CLOSO	2				ORF Names: H477_5566								Complete proteome; Reference proteome														predicted							T0D7A9	T0D7A9_CLOSO	not reviewed	MAKIVIKSEILEMMLYIWDSLHQKEKIADSFFIELADQTDMKYLYDEDFTKESVRKVLSAMSNRELLNKPTKKESRYWNKNMWMLEDLEFTNMMIAPVKQLNLDYMEDKLSKEEYEVIFIPGHMDEYYMDENKLIINFFNITVDLFGEGPVTIAGKPFNEYIEEKLLSI	Uncharacterized protein	Paeniclostridium sordellii ATCC 9714	169
45	3.08	3.42	10.53	10.53	10.53	tr|T0E7B1|T0E7B1_CLOSO	Metallopeptidase M24 family protein OS=Paeniclostridium sordellii ATCC 9714 GN=H477_2217 PE=4 SV=1	CLOSO	2				ORF Names: H477_2217								Complete proteome; Reference proteome														predicted	IPR029149; IPR028980; IPR000994						T0E7B1	T0E7B1_CLOSO	not reviewed	MIWNDRPDLSTAKAFLLDVKYAGETFSSKLNRVRESMKEKNANVHVITTLDDIAWLFNIRGGDVKFNPVVLSYALITLDKVYLFLDKSKLNEEILNELSKENVEIKPYNDIYEFIKTLDKNDKILLDSTKINYAILNNIPSEVEKVDEFNPTMFMKAQKNPIELENIRNSHVKDGVAFTKFMYWLKNNVGKIEISELSASKKLEDLRREQEGFIEPSFGTIAGYRDHAAMMHYSATKESDAKLEASDLFLIDSGGQYFDGTTDITRTIALGKINDELKKHFTAVARGMINLSWLNSYMELEDIT	Metallopeptidase M24 family protein	Paeniclostridium sordellii ATCC 9714	304	domain (1)
46	2.81	2.91	6.04	6.04	6.04	tr|T0D1H9|T0D1H9_CLOSO	Pyruvate ferredoxin/flavodoxin oxidoreductase family protein OS=Paeniclostridium sordellii ATCC 9714 GN=H477_1150 PE=4 SV=1	CLOSO	2			oxidoreductase activity, acting on the aldehyde or oxo group of donors	ORF Names: H477_1150								Complete proteome; Pyruvate; Reference proteome														predicted	IPR017896; IPR017900; IPR019456; IPR019752; IPR002869						T0D1H9	T0D1H9_CLOSO	not reviewed	MSHLRFGDAPIRSTYLIDEADYIACHNQAYVYQYDLLKGLKKGGVFVLNTIWNENELNEHLPAAMKNYIAKNDIQFYTVNGTKLGQEIGLGNRINMIMQSAFFKLAQIIPEADAIEYLKDSIKKAYGKKGEKIVNMNYQAVEAGMNSLVKVNVPSEWADAKDESKKEVNEPDFVKDIVRPMNAQEGDNLPVSTFNGIEDGTFPAGLAAYEKRGVAVNVPEWIVDNCIQCNQCAYICPHACIRPVLVNEEEMKNAPEKFETKKAIGKGFDGLQYRMQVSPMDVQDVETVLTYVQLKKKL	Pyruvate ferredoxin/flavodoxin oxidoreductase family protein	Paeniclostridium sordellii ATCC 9714	298	domain (1)
46	0	2	3.081	3.081	3.081	tr|T0CNN9|T0CNN9_CLOSO	4Fe-4S binding domain protein OS=Paeniclostridium sordellii ATCC 9714 GN=H477_3128 PE=4 SV=1	CLOSO	1			oxidoreductase activity, acting on the aldehyde or oxo group of donors	ORF Names: H477_3128								Complete proteome; Reference proteome														predicted	IPR017896; IPR017900; IPR019456; IPR019752; IPR002869						T0CNN9	T0CNN9_CLOSO	not reviewed	MSHLRFGKTPIKSTYLIDEADYIACHNQSYVNEYDLLKGLKKGGIFVLNCIWEESELENHLPATIKNYIAENNIEFYTVNATKIAQEIGLGNRINMIMQSAFFKLAQIIPEEEAKNHLKESIKKAYGKKGEKIVNMNYEAVEQGMNSIVKVNVPDSWKTAKDEKKNSDEPEFIKNILRPMNAQEGDNLPVSAFNGIEDGTFPNGTAAFEKRGIGINVPEWILENCIQCNQCSYICPHSTIRPFLLNEEEVSKAPESFRVKKAVGKGLEGLQYRIQVDTMDCTGCGNCADVCPAKEKALVMKPLETQTDSEIPNWEFAASSVSYKGDIISPNTVKGSQLDNRLKSFQGHVQDVESLLI	4Fe-4S binding domain protein	Paeniclostridium sordellii ATCC 9714	357	domain (2)
47	2.37	2.39	10.34	10.34	10.34	tr|T0EAY0|T0EAY0_CLOSO	Peptidyl-prolyl cis-trans isomerase OS=Paeniclostridium sordellii ATCC 9714 GN=H477_0324 PE=3 SV=1	CLOSO	2			peptidyl-prolyl cis-trans isomerase activity; protein folding	ORF Names: H477_0324			Belongs to the cyclophilin-type PPIase family.; Contains 1 PPIase cyclophilin-type domain.		PPIases accelerate the folding of proteins. It catalyzes the cis-trans isomerization of proline imidic peptide bonds in oligopeptides.			Complete proteome; Isomerase; Reference proteome; Rotamase														inferred from homology	IPR029000; IPR024936; IPR020892; IPR002130						T0EAY0	T0EAY0_CLOSO	not reviewed	MENKNPIVTIEMENGKQIKIELYPHIAPNTVKNFVSLVQSGFYDGLTFHRVIPGFMIQGGCPNGTGMGGPGHTIKGEFTQNGHTNNLRHERGVISMARTMAPNSAGSQFFLMHANSPHLDGQYASFGRIIEGLDVVDEIASVKTDRMDKPQTPQVMKKVTVETFGKDYSDVEKM	Peptidyl-prolyl cis-trans isomerase	Paeniclostridium sordellii ATCC 9714	174	domain (1)
48	2.22	2.24	7.377	7.377	7.377	tr|T0D5Y9|T0D5Y9_CLOSO	Glutamine amidotransferase class-I family protein OS=Paeniclostridium sordellii ATCC 9714 GN=H477_5844 PE=4 SV=1	CLOSO	2			hydrolase activity; transferase activity; glutamine metabolic process	ORF Names: H477_5844								Complete proteome; Glutamine amidotransferase; Reference proteome; Transferase														predicted	IPR029062; IPR017926; IPR011697						T0D5Y9	T0D5Y9_CLOSO	not reviewed	MKTKKAVIGISGSLIIDEGGMFPGYERAYVNNDYVQSVARCNAVPYIVPMVYDDEIIKEQVENIDALILSGGHDINPLNWGEEPHQKLGGILPKRDTYDFKLLKFALEMKKPILGICRGEQVINVFGGGSLYQDLSLIEGCYVKHNQQHLSNVATHTAIVKEGTKLYEILGEKEIHVNSFHHLAANEIADGYIVSAVSKDGVIEAIEKEGDEFVIGVQWHPEMMTKDNPMMQKLFQALVDETTK	Glutamine amidotransferase class-I family protein	Paeniclostridium sordellii ATCC 9714	244	domain (1)
49	2.13	2.14	13.04	13.04	13.04	tr|T2REA0|T2REA0_CLOSO	Coat F domain protein OS=Paeniclostridium sordellii ATCC 9714 GN=H477_4141 PE=4 SV=1	CLOSO	2				ORF Names: H477_4141								Complete proteome; Reference proteome														predicted	IPR012851						T2REA0	T2REA0_CLOSO	not reviewed	MQLTPAELHNLHELILSCVNTITNMALYRNQITDPELKSMIENQFPVHIQDYNMKVRFIKEANAPSEKLNVPQLKINLQDFTSSPMEPVPVTPRTNIQQLNDREIATGYLLTLKRAGREYAWSSMEATNPVLREFLKDAFTMACNHAYEVAQWLIQRGFYPLCSAPQTEITKVGSLYNEVQDSN	Coat F domain protein	Paeniclostridium sordellii ATCC 9714	184
50	2.05	2.06	10.14	10.14	10.14	tr|T0EB21|T0EB21_CLOSO	Fascin domain protein OS=Paeniclostridium sordellii ATCC 9714 GN=H477_5266 PE=4 SV=1	CLOSO	2				ORF Names: H477_5266								Complete proteome; Reference proteome														predicted	IPR008999; IPR022768						T0EB21	T0EB21_CLOSO	not reviewed	MDGKFLIQTEEGYYVKLDYKTKKLFAVETNKYDATKFKLNIINDKEVTLQTENNDYIQVNEDNILDAKAKTENERTKFKIKEVTKIAYDNIVIISLSQQRFVTAINGGGSYLAATEFNQTVNEEFTILQFLDNSYVIQTKGGYYVRVKDDRLLIADTKELEEASRFLGENLSGDTIILKTPDEYIVRVRDIDKYLIADTKEISDSSKFNIYMSTNPY	Fascin domain protein	Paeniclostridium sordellii ATCC 9714	217	domain (1)
51	2.03	2.03	16.77	16.77	9.938	tr|T0E1V1|T0E1V1_CLOSO	Staygreen family protein OS=Paeniclostridium sordellii ATCC 9714 GN=H477_1887 PE=4 SV=1	CLOSO	1				ORF Names: H477_1887								Complete proteome; Reference proteome														predicted	IPR024438						T0E1V1	T0E1V1_CLOSO	not reviewed	MANLSLSKVNVTIYEPYTLTYPIRFRRYTIFHTENPEVVDLSISPYFYNLDLSTVSTNLIYGQWHWFSGDIYQLVLFVFIGNYEFDIVNERYEKFVEKIHLSIGAVVNGDRVFLENRPQLLKTSVYVRYISSYPRFNKLVTYNKVESYLDSNVVVEIKKGV	Staygreen family protein	Paeniclostridium sordellii ATCC 9714	161	domain (1)
52	2.03	2.03	11.79	8.537	8.537	tr|T0DWE7|T0DWE7_CLOSO	Aminotransferase class-V family protein OS=Paeniclostridium sordellii ATCC 9714 GN=H477_3450 PE=3 SV=1	CLOSO	1			transaminase activity	ORF Names: H477_3450			Belongs to the class-V pyridoxal-phosphate-dependent aminotransferase family.					Aminotransferase; Complete proteome; Pyridoxal phosphate; Reference proteome; Transferase														inferred from homology	IPR000192; IPR020578; IPR015424; IPR015421; IPR015422						T0DWE7	T0DWE7_CLOSO	not reviewed	MFANNEVGTVQPIKEIGEIAKKHKVIFHTDAVQAAGNIPIDVKELNIDLMSMSSHKIYGPKGIGALYIRTGVKLHTLVHGGAQERRRRAGTENIPGIVGYAKACELAKANMGEHIERLTALRTKLIDGILERIPYTKVNGSLQYRLPGNVNFSFEFIEGEGILLMLDMLGIAASSGSACTSGSLDPSHVLMAMGLPHEIAHGSLRLSIGDFTTEEDIDFIIDNLPKIIERLRSMSPLYNKLDKGGN	Aminotransferase class-V family protein	Paeniclostridium sordellii ATCC 9714	246	domain (1)
53	2.01	2.01	13.48	13.48	13.48	tr|T0ECN0|T0ECN0_CLOSO	RNA polymerase Rpb1, domain 4 family protein OS=Paeniclostridium sordellii ATCC 9714 GN=H477_0042 PE=4 SV=1	CLOSO	2			DNA binding; DNA-directed RNA polymerase activity; transcription, DNA-templated	ORF Names: H477_0042								Complete proteome; Reference proteome														predicted	IPR007083; IPR007081						T0ECN0	T0ECN0_CLOSO	not reviewed	MLDHIKSLGFKYSTRGGITVAVADMKIPEAKKAYLAEAEAKVDKYEKAYRRGLISNEERYERVIETWTETTEKVTDALMANLDRLNNIFIMAHSGARGSKNQIRQLAGMRGLMANASGKTVEIPVKSNFREGLSVLEYFTSSHGARKGLADTALRTADSGYLTRRLVDVSQDVIVRDVDCGTTEDTEIFAIKDGNEVIEELYDRIVGRYTIDPIIHPETGEVIVEADSMIQEEQAEKIIESKIDKVKIRTVLNCKTNHGVCSKCYGRNLATGKEGNIEKLLV	RNA polymerase Rpb1, domain 4 family protein	Paeniclostridium sordellii ATCC 9714	282	domain (2)
54	2.01	2.01	15.46	15.46	15.46	tr|T0CWY5|T0CWY5_CLOSO	Uncharacterized protein OS=Paeniclostridium sordellii ATCC 9714 GN=H477_5699 PE=4 SV=1	CLOSO	2				ORF Names: H477_5699								Complete proteome; Reference proteome														predicted							T0CWY5	T0CWY5_CLOSO	not reviewed	MPGCSCDTLDITGRALYPIPLPIDDLTGILTSIINILESLAIPLLQPLITLLNALLDLGDEVLDSIIAILLDLFTTLPNVDLASLCQLKAVAFQTIEPTDASVSPYKVVRSRLKCLLDNGCKKDDCCPKCEDCCCNEGILKEVAGANITGTVTLTAGSLSLQDVEVIGNKDNVIILGNEPEGKFYLVCADAVSL	Uncharacterized protein	Paeniclostridium sordellii ATCC 9714	194
55	2	8	37.02	37.02	37.02	tr|T0D302|T0D302_CLOSO	Reverse rubrerythrin-1 OS=Paeniclostridium sordellii ATCC 9714 GN=H477_0313 PE=4 SV=1	CLOSO	4			iron ion binding; NADH peroxidase activity	ORF Names: H477_0313			Contains 1 ferritin-like diiron domain.					Complete proteome; Oxidoreductase; Peroxidase; Reference proteome														predicted	IPR009040; IPR009078; IPR012347; IPR024934; IPR004039; IPR003251						T0D302	T0D302_CLOSO	not reviewed	MKKFVCTICGYIHEGEMPPEVCPVCKAPASKFEELKGERIWADEHRIGVAQGVDPEILEGLRANFTGECTEVGMYLAMSRQADREGFPEVAEAYKRIAFEEAEHAAKFAELLGEVVVADTKANLKARVEAEYGATDGKLKLAKRAKELGLDAIHDTVHEMCKDEARHGKAFLGLLNRHFEN	Reverse rubrerythrin-1	Paeniclostridium sordellii ATCC 9714	181	domain (2)
56	2	5.14	10.27	10.27	10.27	tr|T0DXC4|T0DXC4_CLOSO	Pyruvate flavodoxin/ferredoxin oxidoreductase, thiamine diP-bdg family protein OS=Paeniclostridium sordellii ATCC 9714 GN=H477_3129 PE=4 SV=1	CLOSO	3			oxidoreductase activity, acting on the aldehyde or oxo group of donors	ORF Names: H477_3129								Complete proteome; Pyruvate; Reference proteome														predicted	IPR033412; IPR019752; IPR002880; IPR002869; IPR029061; IPR009014						T0DXC4	T0DXC4_CLOSO	not reviewed	MAARQTGCVLLASSSVQEVADIAPVAHLAAIKGRLPIIHFFDGFRTSHEIQKVEVLDYEDYENLLDKKALKEFRERALSPNHPVTRGTAQNPDIYFQTREASNKYYEQIVPIIEEYMEKMGQLTGRPHGLFDYFGPQDAKYIIVAMGSVTETIEETITYLNSKGEKYGLVKVHLYRPFSVKHFMSVIPESVEKICVLDRTKEPGSIGEPLYLDVKTAFYECKKSPKIIGGIYGLGSKDTTPADIKAVYDNLKSDNSKNNFTVGIVDDVTNRSIDVDRSFKISQEGTIRCKFWGLGSDGTVGANKQAIKIIGNNTDMFAQAYFAYDSKKSVV	Pyruvate flavodoxin/ferredoxin oxidoreductase, thiamine diP-bdg family protein	Paeniclostridium sordellii ATCC 9714	331	domain (2)
57	2	2	7.514	2.89	2.89	tr|T2RDE0|T2RDE0_CLOSO	Aminopeptidase 2 OS=Paeniclostridium sordellii ATCC 9714 GN=H477_5067 PE=4 SV=1	CLOSO	1			aminopeptidase activity	ORF Names: H477_5067								Aminopeptidase; Complete proteome; Hydrolase; Protease; Reference proteome														predicted	IPR000787						T2RDE0	T2RDE0_CLOSO	not reviewed	MNLERNLEKYAELSVKIGVNIQPGQTLLVRSPIECAPFVRKVVKKAYDLGAKEVFVEWSDEECTLIKYLNAPEDTFNHFPTWVSDQYVDIAKNGGAFLTVYAQDPDLLKDVDPQRVANFQKASAEALQEWRSYTLSDKSKWSIVSVPTANWSKKVFPGVSEEEAIDKMWEAIFHCTRVDQEDPIEAWNQHNKNLKVKMNFLNDSKFKTLYFKSGKTNITMNLPEGHIWASGASKDPNGINFNPNIPTEEVFTLPHKFGVNGVVASTKPLVYGGNVINNFTLTFKDGKIVDFTAEEGYETLSKLIDTDEGSHYLGEVALVPFKSPISDTNIVFYILYMMKMHLVTLL	Aminopeptidase 2	Paeniclostridium sordellii ATCC 9714	346
58	2	2	4.776	4.776	4.776	tr|T0CZT3|T0CZT3_CLOSO	Branched-chain-amino-acid aminotransferase OS=Paeniclostridium sordellii ATCC 9714 GN=ilvE PE=3 SV=1	CLOSO	2			L-isoleucine transaminase activity; L-leucine transaminase activity; L-valine transaminase activity; isoleucine biosynthetic process; leucine biosynthetic process; valine biosynthetic process	ilvE (orf: H477_0714)	Amino-acid biosynthesis; L-isoleucine biosynthesis; L-isoleucine from 2-oxobutanoate: step 4/4.; Amino-acid biosynthesis; L-leucine biosynthesis; L-leucine from 3-methyl-2-oxobutanoate: step 4/4.; Amino-acid biosynthesis; L-valine biosynthesis; L-valine from pyruvate: step 4/4.		Belongs to the class-IV pyridoxal-phosphate-dependent aminotransferase family.					Amino-acid biosynthesis; Aminotransferase; Branched-chain amino acid biosynthesis; Complete proteome; Pyridoxal phosphate; Reference proteome; Transferase	184 N6-(pyridoxal phosphate)lysine													inferred from homology	IPR001544; IPR018300; IPR005786; IPR033939						T0CZT3	T0CZT3_CLOSO	not reviewed	MSKKDIKWSELGFSYIKTDKRYISRWKDGKWDDGILTEDNNITLNEGSTCLHYGQQCFEGLKAYTNKDGEIQLFRPDQNALRMQRSCKRLLMPEIPVDKFIDACKQVVKANEDYVPPYGTGATLYLRPYVIGVGENIGVKPANEYIFGVFCIPVGPYYKGGMAPVNYITTEYDRAAAHGTGRDKVGGNYAASLLAHKEAVEKGFADCIYLDPKTHTKIDEVGAANFFAITKDNKFVTPNSTSILPSITKASLLHVAKEYLNMETEIADVFIDKLDEYKEAGACGTAAVITPIGGIEHKGKMHVFYSQTEVGPVVKKLYDTLYGIQTGDVEAPEDG	Branched-chain-amino-acid aminotransferase	Paeniclostridium sordellii ATCC 9714	335	modified residue (1)
59	2	2	42.22	16.67	16.67	tr|T0CDB2|T0CDB2_CLOSO	Uncharacterized protein OS=Paeniclostridium sordellii ATCC 9714 GN=H477_2974 PE=4 SV=1	CLOSO	1				ORF Names: H477_2974								Complete proteome; Reference proteome														predicted	IPR021328						T0CDB2	T0CDB2_CLOSO	not reviewed	MINDQRYVILSLELHLFFARIMKEHSLFLESGFVTKDSKLELEADHYKREFEKLLGYAISASNGVIRDDILRSGEIVTDYTLGTEQKTQN	Uncharacterized protein	Paeniclostridium sordellii ATCC 9714	90
60	2	2	8.75	8.75	8.75	tr|T2RGL8|T2RGL8_CLOSO	Uncharacterized protein OS=Paeniclostridium sordellii ATCC 9714 GN=H477_4098 PE=4 SV=1	CLOSO	2				ORF Names: H477_4098								Complete proteome; Reference proteome														predicted							T2RGL8	T2RGL8_CLOSO	not reviewed	MTKNNTAQTNSNIDNLTCDRLNSNQYRESQECNCYPERPSYDHCPERPQYGHCYEKPQYDHCPEKPQYGHCHEKPQYDHCPEKPQYNHCHEKPQHDYCPERPQYDPCKGNKKPNCCCCSEAKFNQNECGKPCNPVKFECPDINWLYVHLYWQIEYLISNV	Uncharacterized protein	Paeniclostridium sordellii ATCC 9714	160
61	2	2	13.87	13.87	13.87	tr|T2RFS0|T2RFS0_CLOSO	Uncharacterized protein OS=Paeniclostridium sordellii ATCC 9714 GN=H477_3692 PE=4 SV=1	CLOSO	1				ORF Names: H477_3692								Complete proteome; Reference proteome														predicted							T2RFS0	T2RFS0_CLOSO	not reviewed	MPIPYPLYQSEQGRYFIGQTPQLNANSSTALIALVNPRCSYVNLYINAITVTNLLQDNFSAEFYVHSNQTLNTTSYLISCTNLSIVPTPHNKGIIQYQSGYDLQIYNGVPIFTRIIPQTSTLVIDGGQIIIPPGQSLLVFLEGISSVSSSLNNKSFIVAFGWWEEQICTNYKL	Uncharacterized protein	Paeniclostridium sordellii ATCC 9714	173
62	2	2	4.152	4.152	4.152	tr|T2REI3|T2REI3_CLOSO	Phosphopyruvate hydratase OS=Paeniclostridium sordellii ATCC 9714 GN=eno PE=4 SV=1	CLOSO	1			phosphopyruvate hydratase complex; magnesium ion binding; phosphopyruvate hydratase activity; glycolytic process	eno (orf: H477_4609)								Complete proteome; Lyase; Pyruvate; Reference proteome														predicted	IPR000941; IPR020810; IPR029065; IPR020811; IPR029017						T2REI3	T2REI3_CLOSO	not reviewed	MSLIDLVYAREVLDSRGNPTVEVEVVLESGATGRAIVPSGASTGAFEAVELRDGDKDRFLGKGVEKAVDNVNEIIAPELEGMDATDQPGIDGLLIELDGTPNKGKLGANAILGVSMAVARAAAEEVGLPLFQYLGGVNAKQLPVPMMNILNGGEHADNNVDVQEFMILPVGAKSFREGLRMGAEVFHSLKKVLGEKGLACGVGDEGGFAPNLDSNRAALELIVEAISKAGYEPGQDVMLGLDVAATEMYNKETKKYVLAGEGKELTSEQMVELYEDWANNFPIITIEDG	Phosphopyruvate hydratase	Paeniclostridium sordellii ATCC 9714	289	domain (2)
63	2	2	11.52	11.52	11.52	tr|T2RDG5|T2RDG5_CLOSO	Phosphoglycerate kinase OS=Paeniclostridium sordellii ATCC 9714 GN=H477_4615 PE=3 SV=1	CLOSO	1			cytoplasm; ATP binding; phosphoglycerate kinase activity; glycolytic process	ORF Names: H477_4615	Carbohydrate degradation; glycolysis; pyruvate from D-glyceraldehyde 3-phosphate: step 2/5.		Belongs to the phosphoglycerate kinase family.	Cytoplasm.				ATP-binding; Complete proteome; Cytoplasm; Glycolysis; Kinase; Nucleotide-binding; Reference proteome; Transferase														inferred from homology	IPR001576; IPR015911; IPR015824						T2RDG5	T2RDG5_CLOSO	not reviewed	MLNKKTIEDINVCGKRVLVRCDFNVPLKDGVITDENRLNGAMPTIKYLVDKGAKVILCSHLGKPKGEAKPELSLAPVAKRLSEMLGKEVVFAADENVVGENAKAAVAKMENGDVVLLENTRYRKEETKNEENFSKELASLAEIFVNDAFGTAHRAHCSKLELENF	Phosphoglycerate kinase	Paeniclostridium sordellii ATCC 9714	165
64	2	2	3.39	3.39	3.39	tr|T2RCL9|T2RCL9_CLOSO	ATP synthase F1, alpha subunit OS=Paeniclostridium sordellii ATCC 9714 GN=H477_4869 PE=4 SV=1	CLOSO	1			proton-transporting ATP synthase complex, catalytic core F(1); ATP binding; proton-transporting ATP synthase activity, rotational mechanism; ATP synthesis coupled proton transport	ORF Names: H477_4869								Complete proteome; Hydrolase; Reference proteome														predicted	IPR023366; IPR033732; IPR005294; IPR020003; IPR004100; IPR000194; IPR027417						T2RCL9	T2RCL9_CLOSO	not reviewed	MAGELLEFPGKVYGMALNLEEEMVGAVILGDDSGIKEGDIVKRTGNIVQVPVGDVMIGRVVNSLGQPVDGKGPIKADKFRPVESEATGIMARKSVHEPLQTGIKAIDAMIPIGKGQRELVIGDRQTGKTSICIDTILNQKGKDVVCIYVAIGQKRSTVAQVVNTLEKGGAMDYTIVVSATASESAPLQFLAPYAGVAMGEEFMFNGKHVLIVYDDLTKHAVAYREMSLLLKRPPGREAYPGDVFYLHSRLLERAAKLSDELGAGSITALPIIETQGGDVSAYIPTNVISITDGQIYLVPELFYSGIRPAVDPGISVSRVGGSAQIKSMKKVSGPLKLLYSHIKNLQHSLNSDLT	ATP synthase F1, alpha subunit	Paeniclostridium sordellii ATCC 9714	354	domain (2)
65	2	2	9.677	9.677	9.677	tr|T2RCL7|T2RCL7_CLOSO	ATP synthase alpha/beta chain, C terminal domain protein OS=Paeniclostridium sordellii ATCC 9714 GN=H477_4864 PE=4 SV=1	CLOSO	1			ATP binding	ORF Names: H477_4864								Complete proteome; Reference proteome														predicted	IPR020003; IPR000194; IPR024034; IPR027417						T2RCL7	T2RCL7_CLOSO	not reviewed	MGRLQERITSTNKGSITSVQAVYVPADDLTDPAPATTFTHLDAKTVLSRQKASLGIFPAVDPLESTSRVLDPAVVGKEHYEVAISVQSILQKYKELQDIIAILGMDELSDEDKMTVNRARKIERFLSQPFTVAEQFTGFEGKYVPVKETVRSFKEILEGKHDDLPESAFLFVGSIEEAVAKAKESR	ATP synthase alpha/beta chain, C terminal domain protein	Paeniclostridium sordellii ATCC 9714	186	domain (1)
66	2	2	6.073	6.073	6.073	tr|T0EF15|T0EF15_CLOSO	2-oxoglutarate synthase subunit korA OS=Paeniclostridium sordellii ATCC 9714 GN=korA PE=4 SV=1	CLOSO	1			2-oxoglutarate synthase activity	korA (orf: H477_5532)								Complete proteome; Oxidoreductase; Reference proteome														predicted	IPR002880; IPR029061						T0EF15	T0EF15_CLOSO	not reviewed	MLKKVKLLQGNEACVHGALYAGMNFFAGYPITPSTEVAEISSYMLPKIGGKFIQMEDEIASMAATIGASLTGLKSMTATSGPGFSLKQENIGYAALAEIPCVIVNVQRCGPSTGLPTSPAQGDLMQAKWGTHGDHPIIALSPTTVRDTFDLTVKAFNFSEKYRTPVILLLDEVIGHMREKVEIPQSNELEIYERMKINIDKKDYKIYDQSTLVPPMANFSDGYRYHVTGLMHDETGFPTNSTKQLKF	2-oxoglutarate synthase subunit korA	Paeniclostridium sordellii ATCC 9714	247	domain (1)
67	2	2	5.195	5.195	5.195	tr|T0EC95|T0EC95_CLOSO	Glutamate/Leucine/Phenylalanine/Valine dehydrogenase family protein OS=Paeniclostridium sordellii ATCC 9714 GN=H477_0218 PE=3 SV=1	CLOSO	1			glutamate dehydrogenase (NAD+) activity; cellular amino acid metabolic process	ORF Names: H477_0218			Belongs to the Glu/Leu/Phe/Val dehydrogenases family.					Complete proteome; Oxidoreductase; Reference proteome														inferred from homology	IPR006095; IPR006096; IPR016040; IPR033922						T0EC95	T0EC95_CLOSO	not reviewed	MAMEAAKKKGIDVSNVTVGLQGFGNVGSFAGMYIDEAGAKVIYVEDHTGTIYNENGIDMKALMAYNKEHRCIKGFPGAEPVEQSVIITEVDILMPCALENQITSANAADIKAKIVCEGANGPTTPEADHILFEKGVTLVPDILANSGGVTVSYFEWVQNLMRYNWTFEEVQEKQKALMIKAFEEIWALAGDRNVEMRTAAYMMSIKRIADAMKLRGWYTEAPAQEVAPSLV	Glutamate/Leucine/Phenylalanine/Valine dehydrogenase family protein	Paeniclostridium sordellii ATCC 9714	231	domain (1)
68	2	2	10.48	10.48	10.48	tr|T0EC36|T0EC36_CLOSO	UDP-N-acetylglucosamine 1-carboxyvinyltransferase 1 OS=Paeniclostridium sordellii ATCC 9714 GN=murA1 PE=4 SV=1	CLOSO	1			UDP-N-acetylglucosamine 1-carboxyvinyltransferase activity; UDP-N-acetylgalactosamine biosynthetic process	murA1 (orf: H477_0148)								Complete proteome; Reference proteome; Transferase														predicted	IPR001986; IPR013792; IPR005750						T0EC36	T0EC36_CLOSO	not reviewed	MMAASLSEGTTIIENAAEEPEIVDLANFLNEMGANVKGAGTNTIRIKGVKSLKGAEHNVIPDRIEAATYMVAAAMTKGDITIENVMMEHLKPVVAKLKEAGCEIIDMENSVRVKGPDVLKPIDIKTLPHPGFPTDVQAQFMAMATVANGTGVVIETVFENRFMHVAEFNRMGANIKIEGRSAIVTGVDKLYGSSVKATDLRAGAALILCGLIAEGETEIGDIYHIQRGYVDIDKKIQALGGNIEIIED	UDP-N-acetylglucosamine 1-carboxyvinyltransferase 1	Paeniclostridium sordellii ATCC 9714	248	domain (1)
69	2	2	8.491	8.491	8.491	tr|T0EA98|T0EA98_CLOSO	Creatinase/Prolidase N-terminal domain protein OS=Paeniclostridium sordellii ATCC 9714 GN=H477_5621 PE=4 SV=1	CLOSO	1			hydrolase activity	ORF Names: H477_5621								Complete proteome; Reference proteome														predicted	IPR029149; IPR028980; IPR000587						T0EA98	T0EA98_CLOSO	not reviewed	MKTQRLNAVLDQMRKDGIDQMLVSDSYAIFYLTGKMIHPGERLLALYLNVNGNHKMFINELFPVNEDLGLEMVWFNDTQNAVEIVANNIIKQVLSELIKTGQQNSY	Creatinase/Prolidase N-terminal domain protein	Paeniclostridium sordellii ATCC 9714	106	domain (1)
70	2	2	14.93	14.93	14.93	tr|T0E9N3|T0E9N3_CLOSO	Propanediol utilization PduL family protein OS=Paeniclostridium sordellii ATCC 9714 GN=H477_1156 PE=4 SV=1	CLOSO	1			transferase activity, transferring acyl groups other than amino-acyl groups	ORF Names: H477_1156								Complete proteome; Reference proteome														predicted	IPR008300						T0E9N3	T0E9N3_CLOSO	not reviewed	MSLDDAAKFGVKDKQIVKVRTFGPRSIVFENVLVRANPNFALEMHVDVEEGNAAAVRNGDMVELIAE	Propanediol utilization PduL family protein	Paeniclostridium sordellii ATCC 9714	67
71	2	2	7.353	7.353	7.353	tr|T0E856|T0E856_CLOSO	RNA polymerase Rpb2, domain 6 family protein OS=Paeniclostridium sordellii ATCC 9714 GN=H477_0038 PE=4 SV=1	CLOSO	1			DNA binding; DNA-directed RNA polymerase activity; ribonucleoside binding; transcription, DNA-templated	ORF Names: H477_0038								Complete proteome; Reference proteome														predicted	IPR015712; IPR007120; IPR007121; IPR007641; IPR014724						T0E856	T0E856_CLOSO	not reviewed	MTWEGYNYEDAILINERLVKEDRLSTIHIEEYECEARDTKLGPEEITRDIPNVGESATKNLDERGIIRIGAEVDSGDILVGKVTPKGETELTAEERLLRAIFGEKAREVRDTSLKVPHGESGIIVDVKVFTRENGDDLSPGVNELVRCYIAKKRKIRVGDKMAGRHGNKGVISRVLPEEDMPFMENGQPLDIVLNPQGIPSRMNIGQVLEVHLGLAAKTLGWHVATSVFDGAKEPDIRKALIEAGYPDDGKVTLYDGRTGNSFDNRITVGYMYMLKLHHLVDDKLHARSTGPYSLVTQQPLGGKAQFGGQRFGEMEVWALEAYGAAHILQEILTVKSDTL	RNA polymerase Rpb2, domain 6 family protein	Paeniclostridium sordellii ATCC 9714	340	domain (2)
72	2	2	3.324	3.324	3.324	tr|T0E528|T0E528_CLOSO	Putative amidase domain protein OS=Paeniclostridium sordellii ATCC 9714 GN=H477_1207 PE=4 SV=1	CLOSO	1				ORF Names: H477_1207								Complete proteome; Reference proteome														predicted	IPR024301						T0E528	T0E528_CLOSO	not reviewed	MVDIKTKYINIYNDKLNCTIEYPEIYIKEKDIFIQQINSRIKEDINIFIDMENDNFKIDKDKSNIFIDYKLHFNKNNIVSLSIIFSEIYRYKCLINYVKTYNFDLNKEQIINIQDLIKEKYIDNSITGKILNEYVDYMQNFYIEEGSINFVYSSYEIYNMNEIIEKEIKFKDIYNYLSEYTIQRIRGSKMRQLKEYNRNLAVEYARMWALYRNPKYKDYDPWGGDCTNYISQCIHAGGIPFDHEGKDELQKWYWYSDSSRTPSWTAADPFGRYILNNNNDNTQNKGIYAVIAEYNELELGDIIQLIYQGKAYHTMIVTEVILDDRNYLIDYLICQHTEDLLDFPLSEKIGERKYIKILGYY	Putative amidase domain protein	Paeniclostridium sordellii ATCC 9714	361	domain (1)
73	2	2	8	8	8	tr|T0E4N7|T0E4N7_CLOSO	Acetate kinase OS=Paeniclostridium sordellii ATCC 9714 GN=ackA PE=3 SV=1	CLOSO	1			cytoplasm; acetate kinase activity; ATP binding; magnesium ion binding; acetyl-CoA biosynthetic process; organic acid metabolic process	ackA (orf: H477_1002)	Metabolic intermediate biosynthesis; acetyl-CoA biosynthesis; acetyl-CoA from acetate: step 1/2.		Belongs to the acetokinase family.	Cytoplasm.	Catalyzes the formation of acetyl phosphate from acetate and ATP. Can also catalyze the reverse reaction.			ATP-binding; Complete proteome; Cytoplasm; Kinase; Magnesium; Metal-binding; Nucleotide-binding; Reference proteome; Transferase														inferred from homology	IPR004372; IPR000890						T0E4N7	T0E4N7_CLOSO	not reviewed	MCRTSMGFTPLEGLIMGTRCGDIDAAILPFLMEKEGLTAAGLSDLMNKQSGVYGMTGISSDFRDIEGAASKGDEKAQVALDAYVQRVQKYIGAYAAEMNGVDAVVFTAGVGENGIEIRESIASNMEFLGMKLDKEANKVRGKERVISTEDSKVKMLLIPTNEELMIARDTVALVK	Acetate kinase (Acetokinase)	Paeniclostridium sordellii ATCC 9714	175	nucleotide phosphate-binding region (2); metal ion-binding site (1); site (1)
74	2	2	6.061	6.061	6.061	tr|T0E3Z3|T0E3Z3_CLOSO	Glycine/sarcosine/betaine reductase complex component C subunit beta domain protein OS=Paeniclostridium sordellii ATCC 9714 GN=H477_0807 PE=4 SV=1	CLOSO	1			betaine reductase activity	ORF Names: H477_0807								Complete proteome; Oxidoreductase; Reference proteome														predicted							T0E3Z3	T0E3Z3_CLOSO	not reviewed	MVVAGGASAKLGMNAKDHVKKGLPVLEDVVGGFAILVSENDGVNPIIRTDLTGKHTVGTGSSPQAVMTALITTGLDRANLKITDVDVYSVEMQNPDITKPAGAGDVPEANYKMIGALAVKRGDLEKKELKNFVSERGIPGWAPTQGHIPSGVPYIGFCIDDLTNGDKNRAMIVGKGSLFLGRMTNLFDGVSFIVERNQGVEEEAAAVSKEEIKKIIAESMRKLAQDMLIEE	Glycine/sarcosine/betaine reductase complex component C subunit beta domain protein	Paeniclostridium sordellii ATCC 9714	231
75	2	2	10.53	10.53	10.53	tr|T0E1S4|T0E1S4_CLOSO	Cupin domain protein OS=Paeniclostridium sordellii ATCC 9714 GN=H477_1872 PE=4 SV=1	CLOSO	1				ORF Names: H477_1872								Complete proteome; Reference proteome														predicted	IPR013096; IPR014710; IPR011051						T0E1S4	T0E1S4_CLOSO	not reviewed	MEIMKHLLNGSIEQYNDSVVPKIPVFAGEDITSEVYYFKPGQVLKAHRHPNGEQVFFFLKGNGKMSVEEETFDVNEGSTIFVKAGKWHEITNGISEMVAVQVTKVGAGAEYKEN	Cupin domain protein	Paeniclostridium sordellii ATCC 9714	114	domain (1)
76	2	2	6.042	6.042	6.042	tr|T0DS66|T0DS66_CLOSO	Peptidase T OS=Paeniclostridium sordellii ATCC 9714 GN=pepT PE=4 SV=1	CLOSO	1			cytoplasm; metallopeptidase activity; tripeptide aminopeptidase activity; zinc ion binding; peptide metabolic process	pepT (orf: H477_3180)								Aminopeptidase; Complete proteome; Hydrolase; Protease; Reference proteome														predicted	IPR001261; IPR002933; IPR011650; IPR010161						T0DS66	T0DS66_CLOSO	not reviewed	MKEKVLERFLKYVTFDTTADPKNSNCPSSEGQRVFAKYIVEELKALGLEDANVDENSYVMATLKGNVEGVPTVGFISHLDTAPDVTGKNVKPRIVKNYDGKDIVLNEELNVVTSPKDYPEMETLIGEDVIVTDGTTLLGADDKAGIAEIVTAIEYLVNHPEIKHGDIKIGFTPDEEVGRGANLFDVEKFGAKYAYTMDGGIVGELQYENFNAAAATITIQGRNVHPGSAKNKLVNALHIAAEISEMFPANERPETTEGYEGFYHLNDINGNVEKASMVYIIRDHDKNKFEERKSFMREVVEKVNEKYNGRITLDLNDQYYNMKEKVEPVKF	Peptidase T	Paeniclostridium sordellii ATCC 9714	331	domain (1)
77	2	2	6.818	6.818	6.818	tr|T0D495|T0D495_CLOSO	30S ribosomal protein S8 OS=Paeniclostridium sordellii ATCC 9714 GN=rpsH PE=3 SV=1	CLOSO	1			ribosome; rRNA binding; structural constituent of ribosome; translation	rpsH (orf: H477_0067)			Belongs to the ribosomal protein S8P family.		One of the primary rRNA binding proteins, it binds directly to 16S rRNA central domain where it helps coordinate assembly of the platform of the 30S subunit.			Complete proteome; Reference proteome; Ribonucleoprotein; Ribosomal protein; RNA-binding; rRNA-binding														inferred from homology	IPR000630						T0D495	T0D495_CLOSO	not reviewed	MTMTDPIADMLTRIRNANMVKHETVDVPASNMKKELARILLEEGFIRGYDVIEDGKQGIIRIQLKYGQAGEKVITGLKRISKPGMRVYAAKEELPKVLNGLGISIISTSKGILTDRQARKEGVGGEVICYVW	30S ribosomal protein S8	Paeniclostridium sordellii ATCC 9714	132
78	2	2	10.55	10.55	10.55	tr|T0D3S8|T0D3S8_CLOSO	Pyruvate flavodoxin/ferredoxin oxidoreductase, thiamine diP-bdg family protein OS=Paeniclostridium sordellii ATCC 9714 GN=H477_0136 PE=4 SV=1	CLOSO	1			oxidoreductase activity	ORF Names: H477_0136								Complete proteome; Pyruvate; Reference proteome														predicted	IPR033412; IPR002880; IPR029061; IPR009014						T0D3S8	T0D3S8_CLOSO	not reviewed	MRGGPGLGGIQPSQADYFMSTRGGGNGDYRTPVYAPATVQEAVDMVMEAFEVADYYRTPVMVVGDGMIGQMMEPVEFKQPKKRNLAPKTWASVGTKMERKPNIINSLYLDPKALEDHCINLEAKYKEIEKNETDCEMYKTEDAEIVFVAYGTTSRIVKNTIESLREEGIKAGLIRPKTLWPFPFDAFNHIPQAKNLLTVEMSMGQMVEDVRLAVEGKIPVHFYGRTGGMIPSPAEIADKARQIVEESQEVAMGGAR	Pyruvate flavodoxin/ferredoxin oxidoreductase, thiamine diP-bdg family protein	Paeniclostridium sordellii ATCC 9714	256	domain (2)
79	2	2	2.761	2.761	2.761	tr|T0D2U3|T0D2U3_CLOSO	Arginine--tRNA ligase OS=Paeniclostridium sordellii ATCC 9714 GN=argS PE=3 SV=1	CLOSO	1			arginine-tRNA ligase activity; ATP binding; arginyl-tRNA aminoacylation	argS (orf: H477_0442)			Belongs to the class-I aminoacyl-tRNA synthetase family.					Aminoacyl-tRNA synthetase; ATP-binding; Complete proteome; Ligase; Nucleotide-binding; Protein biosynthesis; Reference proteome														inferred from homology	IPR001278; IPR008909; IPR014729; IPR009080						T0D2U3	T0D2U3_CLOSO	not reviewed	MEDEARAWFTKLENKDKEAVDLWQWFRDESLKEFSRVYDLLDIEFDSYAGESFYSDKMDRVIDIIKEKGLLEESEGTNIVNLEEYNMTPALITKKDGSTLYMTRDLAAALYRKENYDFEKCIYVVGSQQSLHFQQLFKVLELIGFEWAKDMVHVPFGMVALEEGTMSTRKGRVVFLEDVLRQAIEKTKETMLAKNPNAENVDEIAKQVGVGAVVFQELSNSRIKDYTFSWERTLSFEGETGPYVQYTHARCCSVLRKANMDVTTDVDYNLLSDADSSEVLKLIASFNKNLLVAMRKNEPHIVTRFVLDLAQAFNKFYHDNSILVEI	Arginine--tRNA ligase	Paeniclostridium sordellii ATCC 9714	326	domain (1)
80	2	2	20.63	20.63	20.63	tr|T0CXI1|T0CXI1_CLOSO	Uncharacterized protein OS=Paeniclostridium sordellii ATCC 9714 GN=H477_5489 PE=4 SV=1	CLOSO	1				ORF Names: H477_5489								Complete proteome; Reference proteome														predicted	IPR003731						T0CXI1	T0CXI1_CLOSO	not reviewed	MKVCIPIYDERRFQLYQDINNAPNIIIFDTDNNEYIVKDTSKNTLGEIIQFLIDKNNLGLYQT	Uncharacterized protein	Paeniclostridium sordellii ATCC 9714	63
81	2	2	6.993	6.993	6.993	tr|T0CV11|T0CV11_CLOSO	50S ribosomal protein L13 OS=Paeniclostridium sordellii ATCC 9714 GN=rplM PE=3 SV=1	CLOSO	1			ribosome; structural constituent of ribosome; translation	rplM (orf: H477_0096)			Belongs to the ribosomal protein L13P family.		This protein is one of the early assembly proteins of the 50S ribosomal subunit, although it is not seen to bind rRNA by itself. It is important during the early stages of 50S assembly.			Complete proteome; Reference proteome; Ribonucleoprotein; Ribosomal protein														inferred from homology	IPR005822; IPR005823						T0CV11	T0CV11_CLOSO	not reviewed	MKSYIAKPADVQRKWYVVDAEGKTLGRMATEIATILRGKHKPTFTPHVDGGDFVVVVNADKVVLTGKKLDQKMYRYHTGYVGGLKEITYREMMEKKPEEVVMHAVSGMLCKNRLRSRMMTRLRVFAGPNHGHEAQNPEVLNFK	50S ribosomal protein L13	Paeniclostridium sordellii ATCC 9714	143
82	2	2	2.395	2.395	2.395	tr|T0CTR3|T0CTR3_CLOSO	CO dehydrogenase/acetyl-CoA synthase delta subunit OS=Paeniclostridium sordellii ATCC 9714 GN=H477_0476 PE=4 SV=1	CLOSO	1				ORF Names: H477_0476								Complete proteome; Reference proteome														predicted	IPR016041						T0CTR3	T0CTR3_CLOSO	not reviewed	MRIGEEMKVEIAALRYCSNKDSYINLINKVKDSELDVAYMIICEDAQIAKEVTGILKGKNPIVYGANKDNYKNMVEVVKDDKLVLGVKADNLEELYSTTEAIQSLGYKELLLDTTGKTIKDTFTNTIQVRRISLKEQDRTFGYPSLIFANELSKDDKMMEIALSSIFTVKYGSIIVLNDIDYTKALPLFALRQNIYTDPQRPMRVETKVYPINNPDENSPVLVTVDFALTYFIIAGEIERSKVPVWLAIPDAGGYSVLTAWAAGKFSGSSIANFIKESKVSDMTKNRDLIIPGKVAVLKGDIEDNLPGWNVIIGTEESMEVPKFLREYKANQEA	CO dehydrogenase/acetyl-CoA synthase delta subunit	Paeniclostridium sordellii ATCC 9714	334	domain (1)
83	2	2	5.525	5.525	5.525	tr|T0CTP6|T0CTP6_CLOSO	Prismane/CO dehydrogenase family protein OS=Paeniclostridium sordellii ATCC 9714 GN=H477_0456 PE=4 SV=1	CLOSO	1			oxidoreductase activity	ORF Names: H477_0456								Complete proteome; Oxidoreductase; Reference proteome														predicted	IPR004137; IPR011254; IPR016099						T0CTP6	T0CTP6_CLOSO	not reviewed	MKELIKNDILVVTTGCGASAAGKFGLLNKEAKSMASKGLATVCELVDIPPVLHLGSCVDCSRILNVVAEVAKFLDMDMCDIPVAGVAPEWMSEKAVAIGTYVVGSGIDTYLGIMPPIAGSSKTVEILTKTLQDSVGATFKVNENPEELAQMIINGIEKKREHFEELVAQKNAQKEAKPAEA	Prismane/CO dehydrogenase family protein	Paeniclostridium sordellii ATCC 9714	181
84	2	2	16.67	16.67	16.67	tr|T0CMT1|T0CMT1_CLOSO	RutC family protein OS=Paeniclostridium sordellii ATCC 9714 GN=H477_3046 PE=4 SV=1	CLOSO	2				ORF Names: H477_3046								Complete proteome; Reference proteome														predicted	IPR013813; IPR006056; IPR019897; IPR006175						T0CMT1	T0CMT1_CLOSO	not reviewed	MKQVIHTEKAPKAIGPYSQAIKNGNMVFVSGQVPFNPETMEIVEGGAKEQAARSLESLKEILAASGATFADVVKTTVFISDMNDFAEINEVYASYFGENKPARSCVEVARLPRDVKVEIEAIAIVK	RutC family protein	Paeniclostridium sordellii ATCC 9714	126
85	2	2	7.347	7.347	7.347	tr|T0CMB6|T0CMB6_CLOSO	Protein RecA OS=Paeniclostridium sordellii ATCC 9714 GN=H477_3286 PE=3 SV=1	CLOSO	1			ATP binding; DNA-dependent ATPase activity; single-stranded DNA binding; DNA recombination; DNA repair; SOS response	ORF Names: H477_3286			Belongs to the RecA family.	Cytoplasm.	Can catalyze the hydrolysis of ATP in the presence of single-stranded DNA, the ATP-dependent uptake of single-stranded DNA by duplex DNA, and the ATP-dependent hybridization of homologous single-stranded DNAs.			ATP-binding; Complete proteome; Cytoplasm; DNA damage; DNA recombination; DNA repair; DNA-binding; Nucleotide-binding; Reference proteome; SOS response														inferred from homology	IPR003593; IPR013765; IPR020584; IPR027417; IPR020588; IPR020587						T0CMB6	T0CMB6_CLOSO	not reviewed	MAGIQDEKLKALNSALSQIEKDFGKGSVMKLGEANSMAIDVIPTGSIGLDIAVGIGGLPKGRIVEIYGPESSGKTTVTLHAVAEAQKQGGIAAFIDAEHALDPIYAKALGVDVDNLIVSQPDTGEQALEIAEALIRSGAIDIIVIDSVAALVPKAEIEGDMGDSHVGLQARLMSQALRKLTGSIKKSNCVAIFINQLREKVGVMFGSPETTTGGRALKFYSSVRLDVRKIDTIKQGDKVMGVEQE	Protein RecA (Recombinase A)	Paeniclostridium sordellii ATCC 9714	245	domain (2)
86	2	2	9.938	9.938	9.938	tr|T0CG35|T0CG35_CLOSO	Peptidylprolyl isomerase OS=Paeniclostridium sordellii ATCC 9714 GN=H477_2781 PE=4 SV=1	CLOSO	1			peptidyl-prolyl cis-trans isomerase activity	ORF Names: H477_2781								Complete proteome; Isomerase; Reference proteome; Rotamase														predicted	IPR000297; IPR027304						T0CG35	T0CG35_CLOSO	not reviewed	MEKKVLATVGEKEITNIDIENALKSLDPYQAMQFNNEEGKKRLLEDLVNQELFYLEAKESNLHNDENFKAEMKRIEENMLKQYAINKILTSIKLTDEEVANFYAANKDKFIKPETASAKHILVDNEEKANELLTKINNNELSFEEAAREHSTCPSKDADGI	Peptidylprolyl isomerase	Paeniclostridium sordellii ATCC 9714	161	domain (1)
87	1.89	2	37.8	37.8	37.8	tr|T0E0R1|T0E0R1_CLOSO	Coat F domain protein OS=Paeniclostridium sordellii ATCC 9714 GN=H477_1527 PE=4 SV=1	CLOSO	1				ORF Names: H477_1527								Complete proteome; Reference proteome														predicted	IPR012851						T0E0R1	T0E0R1_CLOSO	not reviewed	MQEKEMISDYLSSINASLAGYGGIIAQTENEQLRKTLQDMRDQDEIRQYNLFKKAKEKGYYIPAQPAAESEVSIVKQQLSQG	Coat F domain protein	Paeniclostridium sordellii ATCC 9714	82
88	1.72	2	7.931	7.931	7.931	tr|T0ECN6|T0ECN6_CLOSO	Small GTP-binding domain protein OS=Paeniclostridium sordellii ATCC 9714 GN=H477_0047 PE=4 SV=1	CLOSO	1			GTP binding; GTPase activity	ORF Names: H477_0047								Complete proteome; Reference proteome														predicted	IPR031157; IPR027417; IPR005225; IPR000795						T0ECN6	T0ECN6_CLOSO	not reviewed	MARKFPLERTRNIGIMAHIDAGKTTTTERILFYTGQTHKIGETHEGASQMDWMEQEKERGITITSAATTAAWKDHRINIIDTPGHVDFTVEVERSLRVLDGSVAVFCAKGGVEPQSENVWRQADNYGVPRIAFVNKMDIMGADFYNVVQMMKDRLNANAVPMQLPIGKEDWLEGEVDLLEMKAHIYKDDLGVEIEITEIPEDMKELAQEWREKMVEAVAETDEELMMKYLEGEEPTIEELKTAIRKATIACEMNPVFCGSAYKNKGVQLLLDAVIDYLPAPTDIPAIKGI	Small GTP-binding domain protein	Paeniclostridium sordellii ATCC 9714	290	domain (1)
89	1.62	1.96	4.104	4.104	4.104	tr|T0DZF4|T0DZF4_CLOSO	M42 glutamyl aminopeptidase family protein OS=Paeniclostridium sordellii ATCC 9714 GN=H477_2794 PE=4 SV=1	CLOSO	1			aminopeptidase activity	ORF Names: H477_2794								Aminopeptidase; Complete proteome; Hydrolase; Protease; Reference proteome														predicted	IPR008007; IPR023367						T0DZF4	T0DZF4_CLOSO	not reviewed	MVKEIKSNGRLALTQVGGYMMTSIEGECCKIHTRNGKAYEGTIQTIKPSVHIHSDCRELPRVPANYEVVIDEQVCSKEDTEELGIEVGDFISFDPRVKITDSGFIKSRHLDDKASVAAALYVIEYLKVVGIKPKHTVNFFFSNYEEVGHGSSAAIPENTKEFIAIDMGCPGEGQNSTEYDVCICAKDSGGPYDYELTSKLIDIAKNNNIGYKVDTYPNYGSDAGAMLKAGYDVKTALIGAGIFASHGYERTNLQSIIETIKLVTEYVK	M42 glutamyl aminopeptidase family protein	Paeniclostridium sordellii ATCC 9714	268
90	1.4	1.72	13.51	13.51	13.51	tr|T2RDS8|T2RDS8_CLOSO	Glyceraldehyde 3-phosphate dehydrogenase, C-terminal domain protein OS=Paeniclostridium sordellii ATCC 9714 GN=H477_4616 PE=4 SV=1	CLOSO	1			oxidoreductase activity, acting on the aldehyde or oxo group of donors, NAD or NADP as acceptor	ORF Names: H477_4616								Complete proteome; Reference proteome														predicted	IPR020831; IPR020829						T2RDS8	T2RDS8_CLOSO	not reviewed	MKEASNESFGYTEEPLVSTDIIGIEFGSLFDATQTRVMEVDGQQLVKVTSWYDNEMSYTSQLIRTLGYFANLAK	Glyceraldehyde 3-phosphate dehydrogenase, C-terminal domain protein	Paeniclostridium sordellii ATCC 9714	74	domain (1)
91	1.3	1.64	4.455	4.455	4.455	tr|T0CFX2|T0CFX2_CLOSO	Elongation factor Ts OS=Paeniclostridium sordellii ATCC 9714 GN=tsf PE=3 SV=1	CLOSO	1			cytoplasm; translation elongation factor activity	tsf (orf: H477_2726)			Belongs to the EF-Ts family.	Cytoplasm.	Associates with the EF-Tu.GDP complex and induces the exchange of GDP to GTP. It remains bound to the aminoacyl-tRNA.EF-Tu.GTP complex up to the GTP hydrolysis stage on the ribosome.			Complete proteome; Cytoplasm; Elongation factor; Protein biosynthesis; Reference proteome														inferred from homology	IPR001816; IPR014039						T0CFX2	T0CFX2_CLOSO	not reviewed	MALATEKEDVAGLLTEAHREGVLSEVLNNRIATIGEKLDIRRFAKISTNGQVAGYIHGGGKIGVLVELETEARDAEVLAMGRDIAMQVAAMNPKYVSKDDVDPEYIAHETEILTQQALNEGKPANIVEKMIKGRLDKQLKEVCLVEQAFVKNPDLTIKQLVADVAKKVGSDIKVARVVRFEVGEGIEKKEENFAEEVAKQLK	Elongation factor Ts	Paeniclostridium sordellii ATCC 9714	202	domain (1)
92	1.21	1.55	12.16	12.16	12.16	tr|T0D143|T0D143_CLOSO	Acyl carrier protein OS=Paeniclostridium sordellii ATCC 9714 GN=acpP PE=3 SV=1	CLOSO	1			cytoplasm; ACP phosphopantetheine attachment site binding involved in fatty acid biosynthetic process	acpP (orf: H477_0990)	Lipid metabolism; fatty acid biosynthesis.		Contains 1 acyl carrier domain.	Cytoplasm.	Carrier of the growing fatty acid chain in fatty acid biosynthesis.			Complete proteome; Cytoplasm; Fatty acid biosynthesis; Fatty acid metabolism; Lipid biosynthesis; Lipid metabolism; Phosphopantetheine; Phosphoprotein; Reference proteome	34 O-(pantetheine 4'-phosphoryl)serine													inferred from homology	IPR003231; IPR009081		4'-phosphopantetheine is transferred from CoA to a specific serine of apo-ACP by AcpS. This modification is essential for activity because fatty acids are bound in thioester linkage to the sulfhydryl of the prosthetic group.; 4'-phosphopantetheine is transferred from CoA to a specific serine of apo-ACP by acpS.				T0D143	T0D143_CLOSO	not reviewed	MFEKVVEIIKDQLGIEDKEITMETSLMKDLEADSLDAVEIMMALEDEFSIEIPDTEAEKFVCIGDIVKYIEANK	Acyl carrier protein	Paeniclostridium sordellii ATCC 9714	74	domain (1); modified residue (1)
93	1.17	1.52	10.6	10.6	10.6	tr|T0D100|T0D100_CLOSO	Sporulation transcription factor Spo0A OS=Paeniclostridium sordellii ATCC 9714 GN=spo0A PE=4 SV=1	CLOSO	1			cytoplasm; calcium ion binding; DNA binding; transcription factor activity, sequence-specific DNA binding; detection of stimulus; phosphorelay signal transduction system; regulation of sporulation resulting in formation of a cellular spore; transcription, DNA-templated	spo0A (orf: H477_0955)								Complete proteome; Reference proteome; Transcription; Transcription regulation														predicted	IPR011006; IPR016032; IPR001789; IPR014879; IPR012052; IPR011991						T0D100	T0D100_CLOSO	not reviewed	MNEKIKIVLADDNRDFCQVLREYLSNEDDIEILGIAKDGIEALDLVSRTQPDVLVLDVIMPHLDGLGVIEKLNSMNLAKMPKIIVLSAVGQDKITQSAINLGADYYIVKPFDFVIFINRIRGLVSNKNTVVESKSRGSMDIKMTKTDFVKNVGNIETEITNIIHEIGVPAHIKGYLYLREAIKMVIDNVELLGAVTKELYPSIAKKFNTTQVELKEQ	Sporulation transcription factor Spo0A	Paeniclostridium sordellii ATCC 9714	217	domain (1)
94	1.04	1.39	6.422	6.422	6.422	tr|T2RE01|T2RE01_CLOSO	Melibiase family protein OS=Paeniclostridium sordellii ATCC 9714 GN=H477_4187 PE=4 SV=1	CLOSO	1			carbohydrate metabolic process	ORF Names: H477_4187								Complete proteome; Reference proteome														predicted	IPR003790; IPR013781; IPR017853						T2RE01	T2RE01_CLOSO	not reviewed	MRTDCTLYEFRGVWVATVYDIDWPKTKDNPEAQKQEFIELLDKIQSLNLNAVFVQVRPTSDAFYDSKINPWSAFLTGVQGKYPGYDPMKFMIEETHKRNMQFHAWLNPYRITTKGTDLSVLADNNPAKLHPEWVLSHNDALFYNPQNQEVINYVATTVFEIVSNYDVDEFTLMNIFIHMDTHLQNVIVNAIVDVYVPAIVFVDVNMYVRIQLKIEEKL	Melibiase family protein	Paeniclostridium sordellii ATCC 9714	218	domain (1)
95	1	1.58	84.62	84.62	84.62	tr|T2RDK8|T2RDK8_CLOSO	Small, acid-soluble spore protein beta OS=Paeniclostridium sordellii ATCC 9714 GN=H477_4660 PE=4 SV=1	CLOSO	7			double-stranded DNA binding; DNA topological change	ORF Names: H477_4660								Complete proteome; Reference proteome														predicted	IPR001448; IPR018126						T2RDK8	T2RDK8_CLOSO	not reviewed	MSTKKAVPEAKAALNQMKLEIANELGLSNYDTVDKGNLTARQNGYVGGYMTKKLVEMAERQMSGK	Small, acid-soluble spore protein beta	Paeniclostridium sordellii ATCC 9714	65
96	0.89	1.31	23.53	23.53	23.53	tr|T0CUI5|T0CUI5_CLOSO	Ribosomal subunit interface protein OS=Paeniclostridium sordellii ATCC 9714 GN=H477_0165 PE=4 SV=1	CLOSO	1			primary metabolic process	ORF Names: H477_0165								Complete proteome; Reference proteome														predicted	IPR003489						T0CUI5	T0CUI5_CLOSO	not reviewed	MRITISGKQMELTDAIKDSVETKLKRLDCYLHPETEVKVTVSAKKARQKVEVTIIPISGPIIRAEDTEENLYAAIDVVYDKLNIQLRKYKKEYKIDISLTRV	Ribosomal subunit interface protein	Paeniclostridium sordellii ATCC 9714	102
97	0.87	1.3	10.73	10.73	10.73	tr|T0D6Z2|T0D6Z2_CLOSO	Uncharacterized protein OS=Paeniclostridium sordellii ATCC 9714 GN=H477_5615 PE=4 SV=1	CLOSO	1				ORF Names: H477_5615								Complete proteome; Reference proteome														predicted							T0D6Z2	T0D6Z2_CLOSO	not reviewed	MALTCNKSTELDFSATFNVPKEFQYLDGDNFSIAISTENLTAYKNIIEETIPSAKVICDKTVENLKVKVAQVNVSGYIYFRVAVDGIQSDELIIDPSIPNVTIDPAWSSTDGIVAVEDQNGNKFMTIAYIPVDQELPTTPFKVYLENIELGNVNRDPQSDNITVRVDGKFKIVYMPQ	Uncharacterized protein	Paeniclostridium sordellii ATCC 9714	177
98	0.77	1.2	8.182	3.333	3.333	tr|T0ECM5|T0ECM5_CLOSO	RNA polymerase Rpb2, domain 6 family protein OS=Paeniclostridium sordellii ATCC 9714 GN=H477_0037 PE=3 SV=1	CLOSO	1			DNA binding; DNA-directed RNA polymerase activity; ribonucleoside binding; transcription, DNA-templated	ORF Names: H477_0037			Belongs to the RNA polymerase beta chain family.					Complete proteome; Reference proteome														inferred from homology	IPR019462; IPR015712; IPR007120; IPR007645						T0ECM5	T0ECM5_CLOSO	not reviewed	MERVIKERMTVQDMEAITPQALVNIRPVSAAIKEFFGSSQLSQFMDQTNPLSELTHKRRLSALGPGGLSRERAGFEVRDVHHSHYGRMCPIETPEGPNIGLINSLGTYAKINEFGFIESPYRKYDKENKKVTDEIHYLTADEEDLFIRAQANEPLDEDDAFVNSRVVCRTVNGAMELVPTDKVDYMDISPKQVVSIATAMIPFLENDDANRALMGSNMQRQAVPLVRREAPIIGTGVEYRAAKDSGAVVVAKNSGIADRVTADEIIIKREDGNKDRYKLLKFKRSNQGTCINQTPIISKGDKIEAGDVIADGPSTEMGEVALGRNCFSHS	RNA polymerase Rpb2, domain 6 family protein	Paeniclostridium sordellii ATCC 9714	330	domain (3)
99	0.65	1.07	5.59	5.59	5.59	tr|T0E2K2|T0E2K2_CLOSO	Metallopeptidase M24 family protein OS=Paeniclostridium sordellii ATCC 9714 GN=H477_2218 PE=4 SV=1	CLOSO	1				ORF Names: H477_2218								Complete proteome; Reference proteome														predicted	IPR000994; IPR032416						T0E2K2	T0E2K2_CLOSO	not reviewed	MAKFLYGVRGYNLDILARRPMWNMGIDYKCGTGHGIGFLLNVHEAPNGFRWRIIPDRFDSAVLEEGMVTTNEPGIYVEGSHGIRTENELVVRKAEKNEYGQFMEFEVVTLAPIDLDAIDPEEMNKEEKAYLNWYHELVYNKVSPFLTEDEKAWLKEYTKAI	Metallopeptidase M24 family protein	Paeniclostridium sordellii ATCC 9714	161	domain (2)
99	0	1.02	5.59	5.59	5.59	tr|T0CZ18|T0CZ18_CLOSO	Metallopeptidase M24 family protein OS=Paeniclostridium sordellii ATCC 9714 GN=H477_2221 PE=4 SV=1	CLOSO	1				ORF Names: H477_2221								Complete proteome; Reference proteome														predicted	IPR000994; IPR032416						T0CZ18	T0CZ18_CLOSO	not reviewed	MAKFLYGVKGYNLDILARRPMWNIGLDYKCGTGHGVGFLGTIHEAPNGFRWRINPQRLETATLEEGMVTTNEPGIYIEGSHGIRIENELITKKAEKNEYGQFMEFEVVTFAPIDIDAIDVNDLNREEREYLNNYHKLVYKNISPYLEEDEVQWLKNYTKEI	Metallopeptidase M24 family protein	Paeniclostridium sordellii ATCC 9714	161	domain (2)
100	0.59	1	3.863	3.863	3.863	tr|T0CRP9|T0CRP9_CLOSO	Acetate kinase OS=Paeniclostridium sordellii ATCC 9714 GN=ackA PE=3 SV=1	CLOSO	1			cytoplasm; acetate kinase activity; ATP binding; magnesium ion binding; acetyl-CoA biosynthetic process; organic acid metabolic process	ackA (orf: H477_1003)	Metabolic intermediate biosynthesis; acetyl-CoA biosynthesis; acetyl-CoA from acetate: step 1/2.		Belongs to the acetokinase family.	Cytoplasm.	Catalyzes the formation of acetyl phosphate from acetate and ATP. Can also catalyze the reverse reaction.			ATP-binding; Complete proteome; Cytoplasm; Kinase; Magnesium; Metal-binding; Nucleotide-binding; Reference proteome; Transferase														inferred from homology	IPR004372; IPR000890; IPR023865				149 Proton donor/acceptor	14 ATP; 92 Substrate	T0CRP9	T0CRP9_CLOSO	not reviewed	MKVLVLNCGSSSLKYQLIDMANEEVLCIGLVERIGIEGSILKQEKDGVEGKLVVEQPMKNHQDAIKLVLEGVVHPEFGGVKEISEVEAVGHRVVHGGEKFAKSVKINGEVMAALEECVELAPLHNPANIMGIEACEAILPGVPMVAVFDTAFHQTMPKKSYLYGLPHELYTKYGVRRYGFHGTSHKYVSQRAADMLGKNIEDVKIITCHLGNGASIAAVDGGKCVELQWDSLH	Acetate kinase (Acetokinase)	Paeniclostridium sordellii ATCC 9714	233	nucleotide phosphate-binding region (1); active site (1); metal ion-binding site (1); binding site (2); site (1)
101	0.55	0.97	7.609	7.609	7.609	tr|T2RG70|T2RG70_CLOSO	Uncharacterized protein OS=Paeniclostridium sordellii ATCC 9714 GN=H477_3888 PE=4 SV=1	CLOSO	1				ORF Names: H477_3888								Complete proteome; Reference proteome														predicted							T2RG70	T2RG70_CLOSO	not reviewed	MAAYMITYDLNSEGQNYEKVIKAIKDSSIYWCTFWKSSYLIKSNLTPGEIQGNISPYLDGNDTLLVIEANNNYQGWLSKEDWEFIREKIFDQ	Uncharacterized protein	Paeniclostridium sordellii ATCC 9714	92
102	0.54	0.96	2.827	2.827	2.827	tr|T2RDD1|T2RDD1_CLOSO	Proline racemase A OS=Paeniclostridium sordellii ATCC 9714 GN=H477_4642 PE=3 SV=1	CLOSO	1			proline racemase activity	ORF Names: H477_4642			Belongs to the proline racemase family.					Complete proteome; Isomerase; Reference proteome														inferred from homology	IPR008794						T2RDD1	T2RDD1_CLOSO	not reviewed	MKFSRSIQAIDSHTMGEPTRIVTGGIPNIKGKTMAEKKAYLENNLDHLRTAIMLEPRGHNDMFGSIITQPCHEEADFGIIFMDGGGYLNMCGHGSIGAITAAVETGMVEMKEPVTHVVMDTPAGIVKGEAKVENGKVKGVSIVNVPAFLYKRDVQIEMPEIGTVTFDISFGGSFFAIVKASELGLKVEPKNAQKLTEIGLKMRDIINETIEIQHPELSHIKTVDLVEIYDEPTHPEATYKNVVIFGQGQVDRSPCGTGTSAKLATLHAKGELKEGELFVLKVY	Proline racemase A	Paeniclostridium sordellii ATCC 9714	283
103	0.49	0.91	5.369	5.369	5.369	tr|T0D2K8|T0D2K8_CLOSO	D-lactate dehydrogenase OS=Paeniclostridium sordellii ATCC 9714 GN=ldhD PE=3 SV=1	CLOSO	1			D-lactate dehydrogenase activity; NAD binding	ldhD (orf: H477_0347)			Belongs to the D-isomer specific 2-hydroxyacid dehydrogenase family.					Complete proteome; Oxidoreductase; Reference proteome														inferred from homology	IPR006139; IPR029753; IPR029752; IPR006140; IPR016040						T0D2K8	T0D2K8_CLOSO	not reviewed	MIDLDQAVKNDLIITNVPAYSPNSVAELAVTQTMNLLRNMHLIYRNVHAGDFRWSANLIAREVRSITVGIVGTGKIGSTAAKLFKGLGANVIAFDAYENESLKDILTYKDTLEDLLKESDVVSLHTPLTEETKHMINKDNLKLMKKIPT	D-lactate dehydrogenase	Paeniclostridium sordellii ATCC 9714	149	domain (2)
104	0.47	0.9	5.53	5.53	5.53	RRRRRtr|T0EB11|T0EB11_CLOSO	REVERSED Uncharacterized protein OS=Paeniclostridium sordellii ATCC 9714 GN=H477_5245 PE=4 SV=1	CLOSO	1				ORF Names: H477_5245								Complete proteome; Reference proteome														predicted	IPR007160						T0EB11	T0EB11_CLOSO	not reviewed	MKNVGYDKVLEEENVNFVDMNYGPYTELVLNHSIIRSTPINNIINEADVIISFTQLKMHEEATITASIKNIAMGWPPAEIHGYPKKKTGIHEDLHGFISSIMNQIPIDLSIVSCDKAMIGTGPTDGIPVDNDGLIIVGTDPVAVDTVGARFLGFLPQAVAYLYKLYNDGIGEAKIENIDLKGIDISKAEKIFSKNAYGKAVVLDNKNIKDIHGTQPK	Uncharacterized protein	Paeniclostridium sordellii ATCC 9714	217	domain (1)
105	0.39	0.78	2.581	2.581	2.581	tr|T0CMZ2|T0CMZ2_CLOSO	Thiamine pyrophosphate enzyme, C-terminal TPP binding domain protein OS=Paeniclostridium sordellii ATCC 9714 GN=H477_3127 PE=4 SV=1	CLOSO	1			catalytic activity; thiamine pyrophosphate binding	ORF Names: H477_3127								Complete proteome; Reference proteome														predicted	IPR029061; IPR011766						T0CMZ2	T0CMZ2_CLOSO	not reviewed	MIANATGCSSIWGGSAPSTPYTINHEGKGPAWANSLFEDNAEYGFGMYLGVKQIRDRIQDLLTELSNMDIDEEYKKSFNYWIENKNNGNESKCASEGVINSIDKINSSDEKVSYLINEVKELKDYLIKRSQWIVGGDGWAYDIDYGGLDHVLASGEDVNVLVFDTEIYSNTGGQSSKSTPIAAMAKFAAGGKRTKKKDLGRMAMTYGNVYVAQVALGADKNQLIKSIIEAENYDGPSLIICYAPCISHGLKEGMGRSVANEEKAVKCGYWHLYRFNPTLKQEGKNPFILDSKEPTESFRDFLMSQVRYSG	Thiamine pyrophosphate enzyme, C-terminal TPP binding domain protein	Paeniclostridium sordellii ATCC 9714	310	domain (1)
106	0.35	0.73	11.11	11.11	11.11	tr|T0E5Y2|T0E5Y2_CLOSO	Uncharacterized protein OS=Paeniclostridium sordellii ATCC 9714 GN=H477_1731 PE=4 SV=1	CLOSO	1			integral component of membrane	ORF Names: H477_1731								Complete proteome; Membrane; Reference proteome; Transmembrane; Transmembrane helix														predicted							T0E5Y2	T0E5Y2_CLOSO	not reviewed	MNSNKSNLNRNSNRNDSNLQDKCRELMNYHVVFTMRDGSMLDGIIEGVDDDNVTMLIGEDMVEGEGEGNQRQFGPRRFRRYRRRRIPFSRLVGLSLLAYPFIFPPFIF	Uncharacterized protein	Paeniclostridium sordellii ATCC 9714	108	transmembrane region (1)
107	0.34	0.73	5.988	5.988	5.988	tr|T0DX29|T0DX29_CLOSO	Germination protease OS=Paeniclostridium sordellii ATCC 9714 GN=gpr PE=3 SV=1	CLOSO	1			metalloendopeptidase activity; spore germination	gpr (orf: H477_3007)			Belongs to the peptidase A25 family.		Initiates the rapid degradation of small, acid-soluble proteins during spore germination.			Complete proteome; Hydrolase; Protease; Reference proteome; Zymogen														inferred from homology	IPR023430; IPR005080		Autoproteolytically processed. The inactive tetrameric zymogen termed p46 autoprocesses to a smaller form termed p41, which is active only during spore germination.				T0DX29	T0DX29_CLOSO	not reviewed	MGITGIETSEIVKAIVEATNPDRVIAIDALASRKMERVNSTIQISTAGISPGGGVGNKRKALNKEYLGVDVIAIGVPTVVDAATLTSDVLDLAIDNLMEQSKESEGFYNMLKQLKEDEKYHLIKDSLEPYDKNLIVTPKDIDDTIENLSIIISEGLNRSLHPGRTLN	Germination protease (GPR endopeptidase, Germination proteinase, Spore protease)	Paeniclostridium sordellii ATCC 9714	167
108	0.32	0.49	5.161	5.161	5.161	tr|T0DZ75|T0DZ75_CLOSO	Uncharacterized protein OS=Paeniclostridium sordellii ATCC 9714 GN=H477_2709 PE=4 SV=1	CLOSO	1				ORF Names: H477_2709								Coiled coil; Complete proteome; Reference proteome														predicted							T0DZ75	T0DZ75_CLOSO	not reviewed	MTLESYKTEFGKLYDTNIARLENYSKYKDIAVEEPTKDYPGNEAYLNELKKSYKDSEVKLQEFVNSLKKVKTDDQKLKEMNDKLIKEGDKVIGELKTRSKKLEEVPNDLMSKSEVEFRRGLNDLVKVDNTAKSDFEKMINDVNEFLGMKPSNTKK	Uncharacterized protein	Paeniclostridium sordellii ATCC 9714	155	coiled-coil region (1)
109	0.28	0.45	4.444	4.444	0	tr|T0CUY1|T0CUY1_CLOSO	50S ribosomal protein L5 OS=Paeniclostridium sordellii ATCC 9714 GN=rplE PE=3 SV=1	CLOSO	0			ribosome; rRNA binding; structural constituent of ribosome; tRNA binding; translation	rplE (orf: H477_0066)			Belongs to the ribosomal protein L5P family.		This is 1 of the proteins that binds and probably mediates the attachment of the 5S RNA into the large ribosomal subunit, where it forms part of the central protuberance. In the 70S ribosome it contacts protein S13 of the 30S subunit (bridge B1b), connecting the 2 subunits; this bridge is implicated in subunit movement. Contacts the P site tRNA; the 5S rRNA and some of its associated proteins mig…			Complete proteome; Reference proteome; Ribonucleoprotein; Ribosomal protein; RNA-binding; rRNA-binding; tRNA-binding														inferred from homology	IPR002132; IPR020930; IPR031309; IPR020929; IPR022803; IPR031310						T0CUY1	T0CUY1_CLOSO	not reviewed	MTSRLQEKYVKEVAPALMEKFGYKNVMEIPKLEKIVINMGIGDARENPKGLEAAVAELEMISGQKPVITKARKSVANFKLREGMPVGTKVTLRADKMYYFMDKLVNISLPRVRDFRGVNANAFDGRGNYALGLKEQFIFPEIEYDKVDKVRGMDVIFVTTAKTDEEASELLRLLGMPYSK	50S ribosomal protein L5	Paeniclostridium sordellii ATCC 9714	180	domain (2)
110	0.21	0.36	4.255	4.255	0	tr|T0E461|T0E461_CLOSO	GTP-sensing transcriptional pleiotropic repressor CodY OS=Paeniclostridium sordellii ATCC 9714 GN=codY PE=3 SV=1	CLOSO	0			cytoplasm; DNA binding; GTP binding; transcription factor activity, sequence-specific DNA binding; negative regulation of transcription, DNA-templated; transcription, DNA-templated	codY (orf: H477_0862)			Belongs to the CodY family.	Cytoplasm.	DNA-binding protein that represses the expression of many genes that are induced as cells make the transition from rapid exponential growth to stationary phase. It is a GTP-binding protein that senses the intracellular GTP concentration as an indicator of nutritional limitations. At low GTP concentration it no longer binds GTP and stop to act as a transcriptional repressor.			Complete proteome; Cytoplasm; DNA-binding; GTP-binding; Nucleotide-binding; Reference proteome; Repressor; Transcription; Transcription regulation														inferred from homology	IPR014154; IPR029016; IPR010312; IPR013198; IPR011991						T0E461	T0E461_CLOSO	not reviewed	MFPEPYTKSLLKLNETKENLTGDEMVELFPYEGDRKNKYLTVVPILSSGQRLGTLILSRYDEKFTDDDLVIAEYSATVIGLEILRAIGEELEGEMRKKAVVQMAIGTLSYSELEAVEHIFEELNGKEGLLVASKIADRVGITRSVIVNALRKFESAGVIESRSLGMKGTHIKVLNDKLIEELDKLKSN	GTP-sensing transcriptional pleiotropic repressor CodY	Paeniclostridium sordellii ATCC 9714	188	domain (2); dna-binding region (1)
111	0.17	0.3	4.118	4.118	0	tr|T0CLM2|T0CLM2_CLOSO	Peptidase S49 family protein OS=Paeniclostridium sordellii ATCC 9714 GN=H477_3295 PE=4 SV=1	CLOSO	0			serine-type endopeptidase activity	ORF Names: H477_3295								Complete proteome; Reference proteome														predicted	IPR001907; IPR029045; IPR023562						T0CLM2	T0CLM2_CLOSO	not reviewed	MLFSIEESSEIKGVLVILNTVGGDVEAGLAMAELINSLSKKVVTLVLGGSHSIGVPLATAGNHSFIAPTATMIVHPIRTNGLVIGVNETFEYFKKMQERITQFITRTSDINREELEKLMYSKEELVSDVGSVLIGKEAVDCGLIDEVGGLKEAMSKLRELIKEDDKEDNK	Peptidase S49 family protein	Paeniclostridium sordellii ATCC 9714	170
112	0.11	0.22	8.911	8.911	0	tr|T0CR71|T0CR71_CLOSO	Uncharacterized protein OS=Paeniclostridium sordellii ATCC 9714 GN=H477_0853 PE=4 SV=1	CLOSO	0				ORF Names: H477_0853								Complete proteome; Reference proteome														predicted	IPR011437						T0CR71	T0CR71_CLOSO	not reviewed	MSNPISCSATSCTYNNSGGCFASGIQVTGTRATTTCETNCDTYQDRDSSSFTNSVQENDCARINSILCEAKNCKYNDSGACKAEAVKINMDDASCETFISR	Uncharacterized protein	Paeniclostridium sordellii ATCC 9714	101	domain (2)
113	0.1	0.21	11.83	11.83	0	tr|T0CUY7|T0CUY7_CLOSO	30S ribosomal protein S5 OS=Paeniclostridium sordellii ATCC 9714 GN=rpsE PE=3 SV=1	CLOSO	0			small ribosomal subunit; rRNA binding; structural constituent of ribosome; translation	rpsE (orf: H477_0071)			Belongs to the ribosomal protein S5P family.; Contains 1 S5 DRBM domain.		Located at the back of the 30S subunit body where it stabilizes the conformation of the head with respect to the body.; With S4 and S12 plays an important role in translational accuracy.			Complete proteome; Reference proteome; Ribonucleoprotein; Ribosomal protein; RNA-binding; rRNA-binding														inferred from homology	IPR014720; IPR000851; IPR005712; IPR005324; IPR020568; IPR014721; IPR013810; IPR018192						T0CUY7	T0CUY7_CLOSO	not reviewed	MLRRKPIDARQLDLQEKVIEVRRVTKVVKGGRNFRFAALVVVGDENGHVGIGAGKAMEVPDAIRKAVEDAKKNLINVPMVGTTIPHQVNGHFGAGKILIMPAVQGTGVIAGGPARAVLELAGLKDVRAKSLGTNNPRNMVNATIEGLRSLRTAEDIAKLRGKKVEDLLG	30S ribosomal protein S5	Paeniclostridium sordellii ATCC 9714	169	domain (1)
114	0.09	0.2	6.863	6.863	0	tr|T0E2A7|T0E2A7_CLOSO	ATP-dependent dethiobiotin synthetase BioD OS=Paeniclostridium sordellii ATCC 9714 GN=bioD PE=3 SV=1	CLOSO	0			cytoplasm; ATP binding; dethiobiotin synthase activity; magnesium ion binding; biotin biosynthetic process	bioD (orf: H477_2098)	Cofactor biosynthesis; biotin biosynthesis; biotin from 7,8-diaminononanoate: step 1/2.		Belongs to the dethiobiotin synthetase family.	Cytoplasm.	Catalyzes a mechanistically unusual reaction, the ATP-dependent insertion of CO2 between the N7 and N8 nitrogen atoms of 7,8-diaminopelargonic acid (DAPA) to form an ureido ring.			ATP-binding; Biotin biosynthesis; Complete proteome; Cytoplasm; Ligase; Magnesium; Metal-binding; Nucleotide-binding; Reference proteome														inferred from homology	IPR004472; IPR027417					19 Substrate; 32 ATP; 193 ATP	T0E2A7	T0E2A7_CLOSO	not reviewed	MKKLIDKNINATYYKAVLSGAIEENDKLIPGDAKHVCEISGLDEKYENIVSYSLKNPVSPHLAANIENIDIKFEKIKNDFQNLYKKYDFILAEGSGGIVCPIKIKDGETLMLEDIVKMTGFEIILVARSSVGTINHTFLTVKYLKSKNFKIKGIILNEFDRENIAHLDNAKTIELLTGVKIIAYVPKMYKESQEIDIDINKVII	ATP-dependent dethiobiotin synthetase BioD (DTB synthetase, Dethiobiotin synthase)	Paeniclostridium sordellii ATCC 9714	204	nucleotide phosphate-binding region (1); metal ion-binding site (2); binding site (3)
115	0.09	0.2	12.5	12.5	0	tr|T0CQL2|T0CQL2_CLOSO	Thioredoxin OS=Paeniclostridium sordellii ATCC 9714 GN=H477_2648 PE=3 SV=1	CLOSO	0			cell; protein disulfide oxidoreductase activity; cell redox homeostasis; glycerol ether metabolic process	ORF Names: H477_2648			Belongs to the thioredoxin family.; Contains 1 thioredoxin domain.					Complete proteome; Reference proteome												30 33 Redox-active		inferred from homology	IPR005746; IPR012336; IPR017937; IPR013766						T0CQL2	T0CQL2_CLOSO	not reviewed	MAKIVNTGNFRGAVEEDKGVVVVDFFATWCGPCKMLAPVFESVSEEVSDAKFVKVDIDESLELAQKFGISTVPTMMIFKDGKVVDKLVGFMPKESLKSKVEAHL	Thioredoxin	Paeniclostridium sordellii ATCC 9714	104	domain (1); disulfide bond (1)
116	0.08	0.18	4.301	4.301	0	tr|T0CSN0|T0CSN0_CLOSO	Ornithine carbamoyltransferase OS=Paeniclostridium sordellii ATCC 9714 GN=H477_2544 PE=3 SV=1	CLOSO	0			amino acid binding; ornithine carbamoyltransferase activity	ORF Names: H477_2544			Belongs to the ATCase/OTCase family.					Complete proteome; Reference proteome; Transferase														inferred from homology	IPR006132; IPR006130; IPR006131; IPR002292						T0CSN0	T0CSN0_CLOSO	not reviewed	MDLGMGVTYLGPTGSQMGKKESIADTARVLGRMYDGIEYRGFSQNIVEELSAYAGVPVWNGLTDEFHPTQMLADLLTIEEKLGRLKGVNFVYMGDARNNMCNSLMVACAKMGLNFTACAPKELFPAPELVAQCEAIAKENNCTITLTEDVIKGTKNADVIYTDVWVSMGEPDEVWEARIKQLKPYQ	Ornithine carbamoyltransferase	Paeniclostridium sordellii ATCC 9714	186	domain (2)
117	0.06	0.17	13.81	13.81	0	tr|T0E6N8|T0E6N8_CLOSO	Prismane/CO dehydrogenase family protein OS=Paeniclostridium sordellii ATCC 9714 GN=H477_0455 PE=4 SV=1	CLOSO	0			4 iron, 4 sulfur cluster binding; carbon-monoxide dehydrogenase (acceptor) activity; nickel cation binding; generation of precursor metabolites and energy	ORF Names: H477_0455								Complete proteome; Oxidoreductase; Reference proteome														predicted	IPR016101; IPR004137; IPR011254; IPR016099						T0E6N8	T0E6N8_CLOSO	not reviewed	MAISSRDGNYTIKDDAKLIGLAKEWGIETENRDIYDIAHEVADVALMEFGKPHGKLKFLSRAPHQRQDIWKKHNIEPRAIDREIVTIMHSTHMGCTADIDSLINLSLRTSFADGWGGSMIGTTFSDILFGTPTVRQSEANLGVLENNKVNIILHGHEPSLSEMVVLASEDPELLALAKEVGAEGINLAGMCCTGNEVTMRHGVRTAGDFHQQELAIITGAVEAMIVDVQCIFPALAKVSECYHTKFITTSPKAKISGSTYIEFNEDTALDDAKKIVREAILNFKNRDKEKVYIPELKTTTTVGYSEQTIIGQLDRVVNSQIDSPGTVKPLVTV	Prismane/CO dehydrogenase family protein	Paeniclostridium sordellii ATCC 9714	333
118	0.05	0.13	15.69	15.69	0	tr|T0D4J9|T0D4J9_CLOSO	60 kDa chaperonin OS=Paeniclostridium sordellii ATCC 9714 GN=H477_0242 PE=3 SV=1	CLOSO	0			cytoplasm; ATP binding; protein refolding	ORF Names: H477_0242			Belongs to the chaperonin (HSP60) family.		Prevents misfolding and promotes the refolding and proper assembly of unfolded polypeptides generated under stress conditions.			Complete proteome; Reference proteome														inferred from homology	IPR018370; IPR001844; IPR002423; IPR027409; IPR027413						T0D4J9	T0D4J9_CLOSO	not reviewed	MLEDIAILTGGTVISEELGYDLKEADLSMLGRAGSVKVTKETTTIVDGSGDKKAIEDRVAQIKNQIEQTTSEFDIEKLMERLAKLAGGVAVIKVGAATEVEMKERKLRIEDALNATRAAVEEGIVAGGGTALVSVIPVVDKLVDELEGELKVGAKIIRRALEEPLRQIAINAGLEGAVIIQNVISEEAEVGFDALNEKYVNMIEEGIVDPTKVTRTALQNAASIAGVFLTTEAAVADLPEAEPVPGMGGGMPPMM	60 kDa chaperonin	Paeniclostridium sordellii ATCC 9714	255
[truncated: 3 more columns]

## Sheet: Peptide Summary Rep 1
N	Unused	Total	%Cov	%Cov(50)	%Cov(95)	Accessions	Names	Used	Annotation	Contrib	Conf	Sequence	Modifications	ProteinModifications	Cleavages	dMass	Obs MW	Obs m/z	Theor MW	Theor m/z	Theor z	Sc	Spectrum	Acq Time	Intensity (Peptide)	PrecursorIntensityAcquisition	Apex Time (Peptide)	Elution Peak Width (Peptide)	MS2Counts
1	35.66	35.66	89.51	87.27	87.27	tr|T0DXD7|T0DXD7_CLOSO	Uncharacterized protein OS=Paeniclostridium sordellii ATCC 9714 GN=H477_3144 PE=4 SV=1			2	99	CKSVFEYDVCGQLNR	Carbamidomethyl(C)@1; Carbamyl(K)@2; Carbamidomethyl(C)@10		missed K-S@2	0.0360648	1916.89	959.451	1916.85	959.433	2	16	1.1.1.2959.4	37.1349	224.89	126.83	36.92	0.34	4999.07
1	35.66	35.66	89.51	87.27	87.27	tr|T0DXD7|T0DXD7_CLOSO	Uncharacterized protein OS=Paeniclostridium sordellii ATCC 9714 GN=H477_3144 PE=4 SV=1			2	99	CLGQNVAYK	Carbamidomethyl(C)@1			-0.0307266	1051.48	526.748	1051.51	526.763	2	12	1.1.1.2873.4	27.3654	402.86	402.34	27.27	0.23	21813.1
1	35.66	35.66	89.51	87.27	87.27	tr|T0DXD7|T0DXD7_CLOSO	Uncharacterized protein OS=Paeniclostridium sordellii ATCC 9714 GN=H477_3144 PE=4 SV=1			2	99	CLGQNVAYKEKGLNVVVYDLELELTGR	Carbamidomethyl(C)@1; Carbamyl(K)@9; Carbamyl(K)@11		missed K-E@9; missed K-G@11	-0.0743909	3165.54	1056.19	3165.61	1056.21	3	22	1.1.1.3233.2	66.1131	1420.03	998.76	66.29	0.36	17190
1	35.66	35.66	89.51	87.27	87.27	tr|T0DXD7|T0DXD7_CLOSO	Uncharacterized protein OS=Paeniclostridium sordellii ATCC 9714 GN=H477_3144 PE=4 SV=1			2	99	EKGLNVVVYDLELELTGR			missed K-G@2	0.0404857	2046.14	683.054	2046.1	683.041	3	18	1.1.1.3122.2	55.5419	224.33	200.8	55.62	0.45	4661.12
1	35.66	35.66	89.51	87.27	87.27	tr|T0DXD7|T0DXD7_CLOSO	Uncharacterized protein OS=Paeniclostridium sordellii ATCC 9714 GN=H477_3144 PE=4 SV=1			2	99	FGCSEFTAVAIPCSK	Carbamidomethyl(C)@3; Carbamidomethyl(C)@13			0.00203849	1672.76	837.388	1672.76	837.387	2	22	1.1.1.2954.2	36.4979	2399.75	1935.21	36.58	0.34	64716
1	35.66	35.66	89.51	87.27	87.27	tr|T0DXD7|T0DXD7_CLOSO	Uncharacterized protein OS=Paeniclostridium sordellii ATCC 9714 GN=H477_3144 PE=4 SV=1			2	99	GLNVVVYDLELELTGR				-0.0686393	1788.89	895.454	1788.96	895.488	2	15	1.1.1.3202.3	62.6609	173.53	147.6	62.48	0.79	4722.07
1	35.66	35.66	89.51	87.27	87.27	tr|T0DXD7|T0DXD7_CLOSO	Uncharacterized protein OS=Paeniclostridium sordellii ATCC 9714 GN=H477_3144 PE=4 SV=1			2	99	HDNSNCVVFYFNTLSGDLVVPADGR	Carbamidomethyl(C)@6			0.110079	2795.41	932.81	2795.3	932.773	3	27	1.1.1.3069.2	49.5587	2056.42	2027.42	49.53	0.34	82646.4
1	35.66	35.66	89.51	87.27	87.27	tr|T0DXD7|T0DXD7_CLOSO	Uncharacterized protein OS=Paeniclostridium sordellii ATCC 9714 GN=H477_3144 PE=4 SV=1			2	99	INPGTTSLEQLK				-0.0227164	1299.68	650.848	1299.7	650.859	2	12	1.1.1.2908.3	31.3071	2601.09	436.23	31.01	0.23	7440.95
1	35.66	35.66	89.51	87.27	87.27	tr|T0DXD7|T0DXD7_CLOSO	Uncharacterized protein OS=Paeniclostridium sordellii ATCC 9714 GN=H477_3144 PE=4 SV=1			2	99	LVDTFGSVCDFSQFTGK	Carbamidomethyl(C)@9			-0.0363495	1906.84	954.428	1906.88	954.446	2	18	1.1.1.3009.2	42.7455	3654.35	1164.83	42.37	0.45	26686.1
1	35.66	35.66	89.51	87.27	87.27	tr|T0DXD7|T0DXD7_CLOSO	Uncharacterized protein OS=Paeniclostridium sordellii ATCC 9714 GN=H477_3144 PE=4 SV=1			2	99	MVNNKPCYELDIPNGIDLVLCLQNVVSALIEEQIIVLGGPTR	Deamidated(N)@4; Carbamidomethyl(C)@7; Carbamidomethyl(C)@21			0.109192	4707.54	1570.19	4707.43	1570.15	3	16	1.1.1.3271.4	70.1843	272.13	229.36	69.97	0.57	5336.19
1	35.66	35.66	89.51	87.27	87.27	tr|T0DXD7|T0DXD7_CLOSO	Uncharacterized protein OS=Paeniclostridium sordellii ATCC 9714 GN=H477_3144 PE=4 SV=1			2	99	NVVSALIEEQIIVLGGPTR			cleaved Q-N@N-term	0.0452349	2007.18	670.068	2007.14	670.053	3	16	1.1.1.3159.2	57.7444	77.51	76.16	57.72	0.79	2745.13
1	35.66	35.66	89.51	87.27	87.27	tr|T0DXD7|T0DXD7_CLOSO	Uncharacterized protein OS=Paeniclostridium sordellii ATCC 9714 GN=H477_3144 PE=4 SV=1			2	99	QDFQTQLTVDCIGK	Gln->pyro-Glu@N-term; Carbamidomethyl(C)@11			0.0156376	1634.78	818.396	1634.76	818.388	2	14	1.1.1.2966.4	37.9304	366.57	358.48	37.95	0.34	12959.1
1	35.66	35.66	89.51	87.27	87.27	tr|T0DXD7|T0DXD7_CLOSO	Uncharacterized protein OS=Paeniclostridium sordellii ATCC 9714 GN=H477_3144 PE=4 SV=1			2	99	SNGDDLDFKYELGNLCGPLPSSAR	Ammonia-loss(N)@2; Carbamidomethyl(C)@16		missed K-Y@9	-0.0130086	2607.18	870.067	2607.19	870.071	3	23	1.1.1.3012.4	43.1551	295.09	281.36	43.06	0.34	14210
1	35.66	35.66	89.51	87.27	87.27	tr|T0DXD7|T0DXD7_CLOSO	Uncharacterized protein OS=Paeniclostridium sordellii ATCC 9714 GN=H477_3144 PE=4 SV=1			2	99	SVFEYDVCGQLNR	Carbamidomethyl(C)@8			0.00303607	1585.72	793.869	1585.72	793.867	2	16	1.1.1.2941.3	35.0555	1585.68	914.07	35.22	0.34	17691.1
1	35.66	35.66	89.51	87.27	87.27	tr|T0DXD7|T0DXD7_CLOSO	Uncharacterized protein OS=Paeniclostridium sordellii ATCC 9714 GN=H477_3144 PE=4 SV=1			2	99	TNVTIEKVCINYSSIK	Carbamyl(K)@7; Carbamidomethyl(C)@9		missed K-V@7	0.0500341	1911.03	956.521	1910.98	956.496	2	16	1.1.1.2960.2	37.1795	508.41	489.54	37.25	0.34	14393.1
1	35.66	35.66	89.51	87.27	87.27	tr|T0DXD7|T0DXD7_CLOSO	Uncharacterized protein OS=Paeniclostridium sordellii ATCC 9714 GN=H477_3144 PE=4 SV=1			2	99	YELGNLCGPLPSSAR	Carbamidomethyl(C)@7			-0.00299057	1632.79	817.402	1632.79	817.404	2	18	1.1.1.2951.2	36.157	1837.18	826.49	35.91	0.34	14164.1
1	35.66	35.66	89.51	87.27	87.27	tr|T0DXD7|T0DXD7_CLOSO	Uncharacterized protein OS=Paeniclostridium sordellii ATCC 9714 GN=H477_3144 PE=4 SV=1			1.85387	99	TLSGDLVVPADGR			cleaved N-T@N-term	-0.00705365	1298.68	650.345	1298.68	650.349	2	13	1.1.1.2914.3	31.9886	313.43	272.56	31.92	0.23	8766.11
1	35.66	35.66	89.51	87.27	87.27	tr|T0DXD7|T0DXD7_CLOSO	Uncharacterized protein OS=Paeniclostridium sordellii ATCC 9714 GN=H477_3144 PE=4 SV=1			0.946922	90.74	VCINYSSIK	Carbamidomethyl(C)@2			-0.0126673	1082.53	542.273	1082.54	542.279	2	8	1.1.1.2897.2	30.023	1754.78	1562.5	30.1	0.23	37755.3
1	35.66	35.66	89.51	87.27	87.27	tr|T0DXD7|T0DXD7_CLOSO	Uncharacterized protein OS=Paeniclostridium sordellii ATCC 9714 GN=H477_3144 PE=4 SV=1			0.4698	99	VCINYSSIKINPGTTSLEQLK	Carbamyl@N-term; Carbamidomethyl(C)@2		missed K-I@9	0.0403703	2407.28	803.435	2407.24	803.421	3	14	1.1.1.2991.2	40.7014	270.99	207.92	40.55	0.45	7975.76
1	35.66	35.66	89.51	87.27	87.27	tr|T0DXD7|T0DXD7_CLOSO	Uncharacterized protein OS=Paeniclostridium sordellii ATCC 9714 GN=H477_3144 PE=4 SV=1			0.162412	99	INPGTTSLEQLKIEK	Carbamyl(K)@12		missed K-I@12	0.00781026	1712.94	857.477	1712.93	857.473	2	17	1.1.1.2944.4	35.4308	996.96	978.19	35.44	0.23	26207.1
1	35.66	35.66	89.51	87.27	87.27	tr|T0DXD7|T0DXD7_CLOSO	Uncharacterized protein OS=Paeniclostridium sordellii ATCC 9714 GN=H477_3144 PE=4 SV=1			0.14752	99	FGCSEFTAVAIPCSKCESK	Carbamidomethyl(C)@3; Carbamidomethyl(C)@13; Carbamyl(K)@15; Carbamidomethyl(C)@16		missed K-C@15	0.0371987	2220	1111.01	2219.96	1110.99	2	15	1.1.1.2954.4	36.5669	556.3	552.02	36.57	0.34	16355.2
1	35.66	35.66	89.51	87.27	87.27	tr|T0DXD7|T0DXD7_CLOSO	Uncharacterized protein OS=Paeniclostridium sordellii ATCC 9714 GN=H477_3144 PE=4 SV=1			0.0362122	98.56	QDFQTQLTVDCIGKGVITQK	Carbamidomethyl(C)@11; Carbamyl(K)@14		missed K-G@14	0.00586624	2321.17	774.732	2321.17	774.73	3	12	1.1.1.3822.2	79.1994	91.96	81.07	77.94	3.02	2127.95
1	35.66	35.66	89.51	87.27	87.27	tr|T0DXD7|T0DXD7_CLOSO	Uncharacterized protein OS=Paeniclostridium sordellii ATCC 9714 GN=H477_3144 PE=4 SV=1			0.0329203	99	SQKCKSVFEYDVCGQLNR	Carbamidomethyl(C)@4; Malonyl(K)@5; Carbamidomethyl(C)@13	Malonyl(K)@74	missed K-C@3; missed K-S@5	0.0613068	2303.09	768.705	2303.03	768.684	3	16	1.1.1.2959.2	37.0659	412.89	370.94	37.14	0.23	14185.1
1	35.66	35.66	89.51	87.27	87.27	tr|T0DXD7|T0DXD7_CLOSO	Uncharacterized protein OS=Paeniclostridium sordellii ATCC 9714 GN=H477_3144 PE=4 SV=1			0.00480371	99	KSQKCKSVFEYDVCGQLNR	Carbamidomethyl@N-term; Carbamidomethyl(C)@5; Carboxyethyl(K)@6; Carbamidomethyl(C)@14	Carboxyethyl(K)@74	missed K-S@1; missed K-C@4; missed K-S@6	0.0205235	2474.19	825.737	2474.17	825.73	3	17	1.1.1.2958.4	37.0213	650.1	640.13	37.03	0.23	19251.2
1	35.66	35.66	89.51	87.27	87.27	tr|T0DXD7|T0DXD7_CLOSO	Uncharacterized protein OS=Paeniclostridium sordellii ATCC 9714 GN=H477_3144 PE=4 SV=1			0.00436481	99	KSNGDDLDFKYELGNLCGPLPSSAR	Carbamyl@N-term; Deamidated(N)@3; Carbamyl(K)@10; Carbamidomethyl(C)@17		missed K-S@1; missed K-Y@10	0.0969248	2839.41	947.476	2839.31	947.443	3	18	1.1.1.3026.3	44.7102	397.25	357.44	44.76	0.45	13911.1
1	35.66	35.66	89.51	87.27	87.27	tr|T0DXD7|T0DXD7_CLOSO	Uncharacterized protein OS=Paeniclostridium sordellii ATCC 9714 GN=H477_3144 PE=4 SV=1			0.00130484	86.55	FGCSEFTAVAIPC	Carbamidomethyl(C)@3; Carbamidomethyl(C)@13		cleaved C-S@C-term	0.00143263	1457.63	729.824	1457.63	729.823	2	10	1.1.1.2989.2	40.4742	736.81	637.06	40.55	0.23	23947
1	35.66	35.66	89.51	87.27	87.27	tr|T0DXD7|T0DXD7_CLOSO	Uncharacterized protein OS=Paeniclostridium sordellii ATCC 9714 GN=H477_3144 PE=4 SV=1			0	99	CCNDKCLGQNVAYK	Carbamidomethyl(C)@1; Carbamidomethyl(C)@2; Ammonia-loss(N)@3; Carbamyl(K)@5; Carbamidomethyl(C)@6		missed K-C@5	-0.00056475	1754.72	878.366	1754.72	878.366	2	13	1.1.1.2898.2	30.1366	382.36	374.89	30.11	0.34	11683.4
1	35.66	35.66	89.51	87.27	87.27	tr|T0DXD7|T0DXD7_CLOSO	Uncharacterized protein OS=Paeniclostridium sordellii ATCC 9714 GN=H477_3144 PE=4 SV=1			0	84.66	CKSVFEYDVCGQLNRCCNDKCLGQNVAYKEKGLNVVVYDLELELTGR	Carbamidomethyl(C)@1; Carbamidomethyl(C)@10; Carbamidomethyl(C)@16; Carbamidomethyl(C)@17; Carbamidomethyl(C)@21; Hex(4)HexNAc(3)(N)@25	Hex(4)HexNAc(3)(N)@97	missed K-S@2; missed R-C@15; missed K-C@20; missed K-E@29; missed K-G@31	-0.74552	6869.37	982.345	6870.11	982.452	7	14	1.1.1.3249.3	67.6538	209.83	205.19	67.69	0.34	6704
1	35.66	35.66	89.51	87.27	87.27	tr|T0DXD7|T0DXD7_CLOSO	Uncharacterized protein OS=Paeniclostridium sordellii ATCC 9714 GN=H477_3144 PE=4 SV=1			0	84.66	CKSVFEYDVCGQLNRCCNDKCLGQNVAYKEKGLNVVVYDLELELTGR	Carbamidomethyl(C)@1; Carbamidomethyl(C)@10; Carbamidomethyl(C)@16; Carbamidomethyl(C)@17; Carbamidomethyl(C)@21; Hex(4)HexNAc(3)(N)@34	Hex(4)HexNAc(3)(N)@106	missed K-S@2; missed R-C@15; missed K-C@20; missed K-E@29; missed K-G@31	-0.74552	6869.37	982.345	6870.11	982.452	7	14	1.1.1.3249.3	67.6538	209.83	205.19	67.69	0.34	6704
1	35.66	35.66	89.51	87.27	87.27	tr|T0DXD7|T0DXD7_CLOSO	Uncharacterized protein OS=Paeniclostridium sordellii ATCC 9714 GN=H477_3144 PE=4 SV=1			0	84.66	CKSVFEYDVCGQLNRCCNDKCLGQNVAYKEKGLNVVVYDLELELTGR	Carbamidomethyl(C)@1; Carbamidomethyl(C)@10; Carbamidomethyl(C)@16; Carbamidomethyl(C)@17; Hex(4)HexNAc(3)(N)@18; Carbamidomethyl(C)@21	Hex(4)HexNAc(3)(N)@90	missed K-S@2; missed R-C@15; missed K-C@20; missed K-E@29; missed K-G@31	-0.74552	6869.37	982.345	6870.11	982.452	7	14	1.1.1.3249.3	67.6538	209.83	205.19	67.69	0.34	6704
1	35.66	35.66	89.51	87.27	87.27	tr|T0DXD7|T0DXD7_CLOSO	Uncharacterized protein OS=Paeniclostridium sordellii ATCC 9714 GN=H477_3144 PE=4 SV=1			0	84.66	CKSVFEYDVCGQLNRCCNDKCLGQNVAYKEKGLNVVVYDLELELTGR	Carbamidomethyl(C)@1; Carbamidomethyl(C)@10; Hex(4)HexNAc(3)(N)@14; Carbamidomethyl(C)@16; Carbamidomethyl(C)@17; Carbamidomethyl(C)@21	Hex(4)HexNAc(3)(N)@86	missed K-S@2; missed R-C@15; missed K-C@20; missed K-E@29; missed K-G@31	-0.74552	6869.37	982.345	6870.11	982.452	7	14	1.1.1.3249.3	67.6538	209.83	205.19	67.69	0.34	6704
1	35.66	35.66	89.51	87.27	87.27	tr|T0DXD7|T0DXD7_CLOSO	Uncharacterized protein OS=Paeniclostridium sordellii ATCC 9714 GN=H477_3144 PE=4 SV=1			0	85.63	CLGQNVAYK	Carbamidomethyl(C)@1; Ammonia-loss(N)@5			-0.0138778	1034.47	518.243	1034.49	518.25	2	10	1.1.1.2921.3	32.7836	460.28	431.66	32.82	0.23	16716.1
1	35.66	35.66	89.51	87.27	87.27	tr|T0DXD7|T0DXD7_CLOSO	Uncharacterized protein OS=Paeniclostridium sordellii ATCC 9714 GN=H477_3144 PE=4 SV=1			0	89.74	CLGQNVAYKEK	Carbamidomethyl(C)@1; Carbamyl(K)@9		missed K-E@9	-0.026976	1351.63	676.822	1351.66	676.835	2	12	1.1.1.2876.2	27.6374	367.56	353.05	27.6	0.23	15713.3
1	35.66	35.66	89.51	87.27	87.27	tr|T0DXD7|T0DXD7_CLOSO	Uncharacterized protein OS=Paeniclostridium sordellii ATCC 9714 GN=H477_3144 PE=4 SV=1			0	89.74	CLGQNVAYKEK	Carbamidomethyl(C)@1; Ammonia-loss(N)@5; Carbamyl(K)@9		missed K-E@9	-0.00482567	1334.62	668.319	1334.63	668.322	2	12	1.1.1.2922.4	32.9316	464.06	454.08	32.95	0.34	10112.1
1	35.66	35.66	89.51	87.27	87.27	tr|T0DXD7|T0DXD7_CLOSO	Uncharacterized protein OS=Paeniclostridium sordellii ATCC 9714 GN=H477_3144 PE=4 SV=1			0	99	CLGQNVAYKEKGLNVVVYDLELELTGR	Carbamidomethyl(C)@1; Delta:H(2)C(2)(K)@9; Carbamyl(K)@11		missed K-E@9; missed K-G@11	0.00537459	3148.63	1050.55	3148.62	1050.55	3	18	1.1.1.3260.2	68.8673	476.34	471.68	68.84	0.23	36894
1	35.66	35.66	89.51	87.27	87.27	tr|T0DXD7|T0DXD7_CLOSO	Uncharacterized protein OS=Paeniclostridium sordellii ATCC 9714 GN=H477_3144 PE=4 SV=1			0	99	CLGQNVAYKEKGLNVVVYDLELELTGR	Carbamidomethyl(C)@1; Oxidation(Y)@8; Hypusine(K)@9	Oxidation(Y)@100; Hypusine(K)@101	missed K-E@9; missed K-G@11	0.0516044	3182.72	1061.91	3182.66	1061.9	3	17	1.1.1.3235.2	66.3401	172.46	163.75	66.29	0.55	7111.13
1	35.66	35.66	89.51	87.27	87.27	tr|T0DXD7|T0DXD7_CLOSO	Uncharacterized protein OS=Paeniclostridium sordellii ATCC 9714 GN=H477_3144 PE=4 SV=1			0	99	CLGQNVAYKEKGLNVVVYDLELELTGR	Carbamidomethyl(C)@1; Oxidation(Y)@8; Hypusine(K)@11	Oxidation(Y)@100; Hypusine(K)@103	missed K-E@9; missed K-G@11	0.0516044	3182.72	1061.91	3182.66	1061.9	3	17	1.1.1.3235.2	66.3401	172.46	163.75	66.29	0.55	7111.13
1	35.66	35.66	89.51	87.27	87.27	tr|T0DXD7|T0DXD7_CLOSO	Uncharacterized protein OS=Paeniclostridium sordellii ATCC 9714 GN=H477_3144 PE=4 SV=1			0	99	CLGQNVAYKEKGLNVVVYDLELELTGR	Carbamidomethyl(C)@1; Malonyl(K)@9	Malonyl(K)@101	missed K-E@9; missed K-G@11	-0.0631575	3165.54	1056.19	3165.6	1056.21	3	20	1.1.1.3238.2	66.4739	1420.03	634.07	66.29	0.36	12681
1	35.66	35.66	89.51	87.27	87.27	tr|T0DXD7|T0DXD7_CLOSO	Uncharacterized protein OS=Paeniclostridium sordellii ATCC 9714 GN=H477_3144 PE=4 SV=1			0	99	CLGQNVAYKEKGLNVVVYDLELELTGR	Carbamidomethyl(C)@1; Malonyl(K)@11	Malonyl(K)@103	missed K-E@9; missed K-G@11	-0.0631575	3165.54	1056.19	3165.6	1056.21	3	20	1.1.1.3238.2	66.4739	1420.03	634.07	66.29	0.36	12681
1	35.66	35.66	89.51	87.27	87.27	tr|T0DXD7|T0DXD7_CLOSO	Uncharacterized protein OS=Paeniclostridium sordellii ATCC 9714 GN=H477_3144 PE=4 SV=1			0	70.27	CLGQNVAYKEKGLNVVVYDLELELTGR	Carbamidomethyl(C)@1; Hypusine(K)@11; Oxidation(N)@14	Hypusine(K)@103; Oxidation(N)@106	missed K-E@9; missed K-G@11	0.0516044	3182.72	1061.91	3182.66	1061.9	3	17	1.1.1.3235.2	66.3401	172.46	163.75	66.29	0.55	7111.13
1	35.66	35.66	89.51	87.27	87.27	tr|T0DXD7|T0DXD7_CLOSO	Uncharacterized protein OS=Paeniclostridium sordellii ATCC 9714 GN=H477_3144 PE=4 SV=1			0	70.27	CLGQNVAYKEKGLNVVVYDLELELTGR	Carbamidomethyl(C)@1; Hypusine(K)@9; Oxidation(N)@14	Hypusine(K)@101; Oxidation(N)@106	missed K-E@9; missed K-G@11	0.0516044	3182.72	1061.91	3182.66	1061.9	3	17	1.1.1.3235.2	66.3401	172.46	163.75	66.29	0.55	7111.13
1	35.66	35.66	89.51	87.27	87.27	tr|T0DXD7|T0DXD7_CLOSO	Uncharacterized protein OS=Paeniclostridium sordellii ATCC 9714 GN=H477_3144 PE=4 SV=1			0	99	EKGLNVVVYDLELELTGR			missed K-G@2	0.0404857	2046.14	683.054	2046.1	683.041	3	14	1.1.1.3121.4	55.4973	224.33	184.52	55.62	0.45	3844.01
1	35.66	35.66	89.51	87.27	87.27	tr|T0DXD7|T0DXD7_CLOSO	Uncharacterized protein OS=Paeniclostridium sordellii ATCC 9714 GN=H477_3144 PE=4 SV=1			0	99	EKGLNVVVYDLELELTGR	Carbamyl@N-term		missed K-G@2	-0.0744251	2089.03	697.351	2089.11	697.376	3	20	1.1.1.3197.2	62.0587	3252.73	1513.3	62.26	0.34	12910.2
1	35.66	35.66	89.51	87.27	87.27	tr|T0DXD7|T0DXD7_CLOSO	Uncharacterized protein OS=Paeniclostridium sordellii ATCC 9714 GN=H477_3144 PE=4 SV=1			0	99	EKGLNVVVYDLELELTGR	Carbamyl@N-term		missed K-G@2	-0.0744251	2089.03	697.351	2089.11	697.376	3	21	1.1.1.3200.2	62.3993	3252.73	2879.1	62.26	0.34	63969.1
1	35.66	35.66	89.51	87.27	87.27	tr|T0DXD7|T0DXD7_CLOSO	Uncharacterized protein OS=Paeniclostridium sordellii ATCC 9714 GN=H477_3144 PE=4 SV=1			0	99	EKGLNVVVYDLELELTGR	Carbamyl@N-term		missed K-G@2	-0.0744251	2089.03	697.351	2089.11	697.376	3	18	1.1.1.3203.3	62.7745	3252.73	543.98	62.26	0.34	7449.13
1	35.66	35.66	89.51	87.27	87.27	tr|T0DXD7|T0DXD7_CLOSO	Uncharacterized protein OS=Paeniclostridium sordellii ATCC 9714 GN=H477_3144 PE=4 SV=1			0	99	EKGLNVVVYDLELELTGR	Carbamyl@N-term		missed K-G@2	-0.0744251	2089.03	697.351	2089.11	697.376	3	16	1.1.1.3206.3	63.116	3252.73	123.07	62.26	0.34	3021.19
1	35.66	35.66	89.51	87.27	87.27	tr|T0DXD7|T0DXD7_CLOSO	Uncharacterized protein OS=Paeniclostridium sordellii ATCC 9714 GN=H477_3144 PE=4 SV=1			0	99	EKGLNVVVYDLELELTGR	Carbamyl@N-term; Oxidation(Y)@9	Oxidation(Y)@110	missed K-G@2	-0.0579532	2105.04	702.688	2105.1	702.707	3	19	1.1.1.3199.4	62.3548	109.07	105.49	62.26	0.57	21182.1
1	35.66	35.66	89.51	87.27	87.27	tr|T0DXD7|T0DXD7_CLOSO	Uncharacterized protein OS=Paeniclostridium sordellii ATCC 9714 GN=H477_3144 PE=4 SV=1			0	99	EKGLNVVVYDLELELTGR	Cation:K(E)@1; Oxidation(N)@5	Oxidation(N)@106	missed K-G@2	0.161898	2100.21	1051.11	2100.05	1051.03	2	14	1.1.1.3183.4	60.5379	104.03	98.37	60.44	0.91	5015.13
1	35.66	35.66	89.51	87.27	87.27	tr|T0DXD7|T0DXD7_CLOSO	Uncharacterized protein OS=Paeniclostridium sordellii ATCC 9714 GN=H477_3144 PE=4 SV=1			0	99	EKGLNVVVYDLELELTGR	Cation:K(E)@1; Carbamidomethyl(K)@2; Deamidated(N)@5		missed K-G@2	-0.0792106	2141.98	715.001	2142.06	715.028	3	14	1.1.1.3198.3	62.2068	231.03	210.49	62.26	0.34	7682.1
1	35.66	35.66	89.51	87.27	87.27	tr|T0DXD7|T0DXD7_CLOSO	Uncharacterized protein OS=Paeniclostridium sordellii ATCC 9714 GN=H477_3144 PE=4 SV=1			0	99	EKGLNVVVYDLELELTGR	Glu->pyro-Glu@N-term; GG(K)@2	GG(K)@103	missed K-G@2	-0.150212	2141.98	715.001	2142.13	715.051	3	12	1.1.1.3198.2	62.1723	231.03	194.05	62.26	0.34	6739.1
1	35.66	35.66	89.51	87.27	87.27	tr|T0DXD7|T0DXD7_CLOSO	Uncharacterized protein OS=Paeniclostridium sordellii ATCC 9714 GN=H477_3144 PE=4 SV=1			0	95.88	EKGLNVVVYDLELELTGR	Glu->pyro-Glu@N-term; GG(K)@2	GG(K)@103	missed K-G@2	-0.150212	2141.98	715.001	2142.13	715.051	3	11	1.1.1.3201.3	62.5474	231.03	122.97	62.26	0.34	4282.12
1	35.66	35.66	89.51	87.27	87.27	tr|T0DXD7|T0DXD7_CLOSO	Uncharacterized protein OS=Paeniclostridium sordellii ATCC 9714 GN=H477_3144 PE=4 SV=1			0	76.28	EKGLNVVVYDLELELTGR	Glu->pyro-Glu@N-term; GG(K)@2	GG(K)@103	missed K-G@2	-0.150212	2141.98	715.001	2142.13	715.051	3	13	1.1.1.3198.3	62.2068	231.03	210.49	62.26	0.34	7682.1
1	35.66	35.66	89.51	87.27	87.27	tr|T0DXD7|T0DXD7_CLOSO	Uncharacterized protein OS=Paeniclostridium sordellii ATCC 9714 GN=H477_3144 PE=4 SV=1			0	41.6	EKGLNVVVYDLELELTGR	Carbamyl@N-term; Oxidation(D)@10	Oxidation(D)@111	missed K-G@2	-0.0579532	2105.04	702.688	2105.1	702.707	3	19	1.1.1.3199.4	62.3548	109.07	105.49	62.26	0.57	21182.1
1	35.66	35.66	89.51	87.27	87.27	tr|T0DXD7|T0DXD7_CLOSO	Uncharacterized protein OS=Paeniclostridium sordellii ATCC 9714 GN=H477_3144 PE=4 SV=1			0	99	FGCSEFTAVAIPCSK	Carbamidomethyl(C)@3; Carbamidomethyl(C)@13			0.00203849	1672.76	837.388	1672.76	837.387	2	20	1.1.1.2957.2	36.8387	2399.75	1367.69	36.58	0.34	37431.9
1	35.66	35.66	89.51	87.27	87.27	tr|T0DXD7|T0DXD7_CLOSO	Uncharacterized protein OS=Paeniclostridium sordellii ATCC 9714 GN=H477_3144 PE=4 SV=1			0	99	GLNVVVYDLELELTGR	Deamidated(N)@3			0.105021	1790.05	896.033	1789.95	895.98	2	15	1.1.1.3125.4	55.9515	124.22	123.66	55.96	0.91	3805.13
1	35.66	35.66	89.51	87.27	87.27	tr|T0DXD7|T0DXD7_CLOSO	Uncharacterized protein OS=Paeniclostridium sordellii ATCC 9714 GN=H477_3144 PE=4 SV=1			0	99	GLNVVVYDLELELTGR				-0.00285252	1788.96	895.487	1788.96	895.488	2	20	1.1.1.3181.2	60.2419	4396.54	2865.08	60.44	0.57	66915
1	35.66	35.66	89.51	87.27	87.27	tr|T0DXD7|T0DXD7_CLOSO	Uncharacterized protein OS=Paeniclostridium sordellii ATCC 9714 GN=H477_3144 PE=4 SV=1			0	99	GLNVVVYDLELELTGR	Oxidation(Y)@7	Oxidation(Y)@110		0.0307624	1804.99	903.501	1804.96	903.486	2	17	1.1.1.3182.4	60.4243	215.95	215.06	60.43	0.68	13817.1
1	35.66	35.66	89.51	87.27	87.27	tr|T0DXD7|T0DXD7_CLOSO	Uncharacterized protein OS=Paeniclostridium sordellii ATCC 9714 GN=H477_3144 PE=4 SV=1			0	99	GLNVVVYDLELELTGR				-0.00285252	1788.96	895.487	1788.96	895.488	2	19	1.1.1.3184.2	60.5825	4396.54	4026.24	60.44	0.57	100462
1	35.66	35.66	89.51	87.27	87.27	tr|T0DXD7|T0DXD7_CLOSO	Uncharacterized protein OS=Paeniclostridium sordellii ATCC 9714 GN=H477_3144 PE=4 SV=1			0	99	GLNVVVYDLELELTGR				-0.00285252	1788.96	895.487	1788.96	895.488	2	20	1.1.1.3187.2	60.9231	4396.54	1820.9	60.44	0.57	27965.9
1	35.66	35.66	89.51	87.27	87.27	tr|T0DXD7|T0DXD7_CLOSO	Uncharacterized protein OS=Paeniclostridium sordellii ATCC 9714 GN=H477_3144 PE=4 SV=1			0	99	GLNVVVYDLELELTGR				-0.00285252	1788.96	895.487	1788.96	895.488	2	18	1.1.1.3190.2	61.2638	4396.54	545.66	60.44	0.57	10070.1
1	35.66	35.66	89.51	87.27	87.27	tr|T0DXD7|T0DXD7_CLOSO	Uncharacterized protein OS=Paeniclostridium sordellii ATCC 9714 GN=H477_3144 PE=4 SV=1			0	99	GLNVVVYDLELELTGR				-0.00285252	1788.96	895.487	1788.96	895.488	2	16	1.1.1.3193.3	61.639	4396.54	268.71	60.44	0.57	5753.19
1	35.66	35.66	89.51	87.27	87.27	tr|T0DXD7|T0DXD7_CLOSO	Uncharacterized protein OS=Paeniclostridium sordellii ATCC 9714 GN=H477_3144 PE=4 SV=1			0	99	GLNVVVYDLELELTGR				-0.00285252	1788.96	895.487	1788.96	895.488	2	18	1.1.1.3196.2	61.9451	4396.54	213.75	60.44	0.57	5266.19
1	35.66	35.66	89.51	87.27	87.27	tr|T0DXD7|T0DXD7_CLOSO	Uncharacterized protein OS=Paeniclostridium sordellii ATCC 9714 GN=H477_3144 PE=4 SV=1			0	99	GLNVVVYDLELELTGR	Deamidated(N)@3			-0.0138591	1789.93	895.973	1789.95	895.98	2	18	1.1.1.3199.2	62.2858	146.42	146.11	62.36	0.91	5769.13
1	35.66	35.66	89.51	87.27	87.27	tr|T0DXD7|T0DXD7_CLOSO	Uncharacterized protein OS=Paeniclostridium sordellii ATCC 9714 GN=H477_3144 PE=4 SV=1			0	99	GLNVVVYDLELELTGR				-0.0686393	1788.89	895.454	1788.96	895.488	2	17	1.1.1.3206.4	63.1505	173.53	74.98	62.48	0.79	3208.13
1	35.66	35.66	89.51	87.27	87.27	tr|T0DXD7|T0DXD7_CLOSO	Uncharacterized protein OS=Paeniclostridium sordellii ATCC 9714 GN=H477_3144 PE=4 SV=1			0	99	GLNVVVYDLELELTGR				-0.065832	1788.9	895.455	1788.96	895.488	2	15	1.1.1.3214.3	64.0246	106.74	94.17	65.07	2.58	2945.12
1	35.66	35.66	89.51	87.27	87.27	tr|T0DXD7|T0DXD7_CLOSO	Uncharacterized protein OS=Paeniclostridium sordellii ATCC 9714 GN=H477_3144 PE=4 SV=1			0	99	GLNVVVYDLELELTGR				-0.065832	1788.9	895.455	1788.96	895.488	2	15	1.1.1.3228.4	65.6145	106.74	96.27	65.07	2.58	2630.13
1	35.66	35.66	89.51	87.27	87.27	tr|T0DXD7|T0DXD7_CLOSO	Uncharacterized protein OS=Paeniclostridium sordellii ATCC 9714 GN=H477_3144 PE=4 SV=1			0	99	GLNVVVYDLELELTGR				-0.0334879	1788.93	895.472	1788.96	895.488	2	14	1.1.1.3240.4	66.7355	97.56	74.37	65.96	1.23	2387.13
1	35.66	35.66	89.51	87.27	87.27	tr|T0DXD7|T0DXD7_CLOSO	Uncharacterized protein OS=Paeniclostridium sordellii ATCC 9714 GN=H477_3144 PE=4 SV=1			0	99	GLNVVVYDLELELTGR	Carbamidomethyl@N-term			0.0386682	1846.02	924.018	1845.98	923.999	2	14	1.1.1.3187.4	60.9921	192.37	183.01	61.11	0.57	5248.13
1	35.66	35.66	89.51	87.27	87.27	tr|T0DXD7|T0DXD7_CLOSO	Uncharacterized protein OS=Paeniclostridium sordellii ATCC 9714 GN=H477_3144 PE=4 SV=1			0	99	GLNVVVYDLELELTGR				-0.065832	1788.9	895.455	1788.96	895.488	2	12	1.1.1.3217.3	64.3652	106.74	102.34	65.07	2.58	2912.19
1	35.66	35.66	89.51	87.27	87.27	tr|T0DXD7|T0DXD7_CLOSO	Uncharacterized protein OS=Paeniclostridium sordellii ATCC 9714 GN=H477_3144 PE=4 SV=1			0	99	GLNVVVYDLELELTGR				-0.065832	1788.9	895.455	1788.96	895.488	2	13	1.1.1.3223.2	65.0121	106.74	105.36	65.07	2.58	3277.13
1	35.66	35.66	89.51	87.27	87.27	tr|T0DXD7|T0DXD7_CLOSO	Uncharacterized protein OS=Paeniclostridium sordellii ATCC 9714 GN=H477_3144 PE=4 SV=1			0	99	GLNVVVYDLELELTGR	Formyl@N-term; Dimethyl(N)@3	Dimethyl(N)@106		-0.0488413	1844.94	615.987	1844.99	616.003	3	15	1.1.1.3182.2	60.3554	155.19	141.78	60.43	0.57	10042.1
1	35.66	35.66	89.51	87.27	87.27	tr|T0DXD7|T0DXD7_CLOSO	Uncharacterized protein OS=Paeniclostridium sordellii ATCC 9714 GN=H477_3144 PE=4 SV=1			0	99	GLNVVVYDLELELTGR				-0.0334879	1788.93	895.472	1788.96	895.488	2	13	1.1.1.3231.2	65.8861	97.56	97.15	65.96	1.23	2877.13
1	35.66	35.66	89.51	87.27	87.27	tr|T0DXD7|T0DXD7_CLOSO	Uncharacterized protein OS=Paeniclostridium sordellii ATCC 9714 GN=H477_3144 PE=4 SV=1			0	99	GLNVVVYDLELELTGR				-0.0334879	1788.93	895.472	1788.96	895.488	2	12	1.1.1.3234.4	66.2955	97.56	72.33	65.96	1.23	2568.07
1	35.66	35.66	89.51	87.27	87.27	tr|T0DXD7|T0DXD7_CLOSO	Uncharacterized protein OS=Paeniclostridium sordellii ATCC 9714 GN=H477_3144 PE=4 SV=1			0	99	GLNVVVYDLELELTGR				-0.0275073	1788.93	895.475	1788.96	895.488	2	12	1.1.1.3243.3	67.0416	83.41	82.6	66.97	1.54	2744.13
1	35.66	35.66	89.51	87.27	87.27	tr|T0DXD7|T0DXD7_CLOSO	Uncharacterized protein OS=Paeniclostridium sordellii ATCC 9714 GN=H477_3144 PE=4 SV=1			0	99	GLNVVVYDLELELTGR				0.0375471	1789	895.507	1788.96	895.488	2	11	1.1.1.3290.2	71.4106	68.77	51.38	70.76	2.1	1000.13
1	35.66	35.66	89.51	87.27	87.27	tr|T0DXD7|T0DXD7_CLOSO	Uncharacterized protein OS=Paeniclostridium sordellii ATCC 9714 GN=H477_3144 PE=4 SV=1			0	99	HDNSNCVVFYFNTLSGDLVVPADGR	Carbamidomethyl(C)@6			0.110079	2795.41	932.81	2795.3	932.773	3	24	1.1.1.3066.2	49.218	2056.42	477.14	49.53	0.34	12962.9
1	35.66	35.66	89.51	87.27	87.27	tr|T0DXD7|T0DXD7_CLOSO	Uncharacterized protein OS=Paeniclostridium sordellii ATCC 9714 GN=H477_3144 PE=4 SV=1			0	99	HDNSNCVVFYFNTLSGDLVVPADGR	Carbamidomethyl(C)@6			0.110079	2795.41	932.81	2795.3	932.773	3	25	1.1.1.3072.2	49.8993	2056.42	693.41	49.53	0.34	26419.1
1	35.66	35.66	89.51	87.27	87.27	tr|T0DXD7|T0DXD7_CLOSO	Uncharacterized protein OS=Paeniclostridium sordellii ATCC 9714 GN=H477_3144 PE=4 SV=1			0	99	HDNSNCVVFYFNTLSGDLVVPADGR	Carbamidomethyl(C)@6			0.110079	2795.41	932.81	2795.3	932.773	3	20	1.1.1.3073.2	50.0129	2056.42	374.65	49.53	0.34	33294.2
1	35.66	35.66	89.51	87.27	87.27	tr|T0DXD7|T0DXD7_CLOSO	Uncharacterized protein OS=Paeniclostridium sordellii ATCC 9714 GN=H477_3144 PE=4 SV=1			0	99	HDNSNCVVFYFNTLSGDLVVPADGR	Carbamidomethyl(C)@6; Deamidated(N)@12			0.0447596	2796.33	933.116	2796.28	933.101	3	22	1.1.1.3084.4	51.331	254.8	253.63	51.34	0.57	11499.1
1	35.66	35.66	89.51	87.27	87.27	tr|T0DXD7|T0DXD7_CLOSO	Uncharacterized protein OS=Paeniclostridium sordellii ATCC 9714 GN=H477_3144 PE=4 SV=1			0	99	HDNSNCVVFYFNTLSGDLVVPADGR	Deamidated(N)@5; Carbamidomethyl(C)@6			0.0447596	2796.33	933.116	2796.28	933.101	3	23	1.1.1.3084.4	51.331	254.8	253.63	51.34	0.57	11499.1
1	35.66	35.66	89.51	87.27	87.27	tr|T0DXD7|T0DXD7_CLOSO	Uncharacterized protein OS=Paeniclostridium sordellii ATCC 9714 GN=H477_3144 PE=4 SV=1			0	99	HDNSNCVVFYFNTLSGDLVVPADGR	Deamidated(N)@3; Carbamidomethyl(C)@6			0.0447596	2796.33	933.116	2796.28	933.101	3	23	1.1.1.3084.4	51.331	254.8	253.63	51.34	0.57	11499.1
1	35.66	35.66	89.51	87.27	87.27	tr|T0DXD7|T0DXD7_CLOSO	Uncharacterized protein OS=Paeniclostridium sordellii ATCC 9714 GN=H477_3144 PE=4 SV=1			0	99	HDNSNCVVFYFNTLSGDLVVPADGR	Carbamidomethyl(C)@6; Deamidated(N)@12			0.0339579	2796.32	933.112	2796.28	933.101	3	17	1.1.1.3734.4	76.7191	111.16	110.58	76.72	0.95	3792.06
1	35.66	35.66	89.51	87.27	87.27	tr|T0DXD7|T0DXD7_CLOSO	Uncharacterized protein OS=Paeniclostridium sordellii ATCC 9714 GN=H477_3144 PE=4 SV=1			0	99	HDNSNCVVFYFNTLSGDLVVPADGR	Deamidated(N)@3; Carbamidomethyl(C)@6			0.0339579	2796.32	933.112	2796.28	933.101	3	18	1.1.1.3734.4	76.7191	111.16	110.58	76.72	0.95	3792.06
1	35.66	35.66	89.51	87.27	87.27	tr|T0DXD7|T0DXD7_CLOSO	Uncharacterized protein OS=Paeniclostridium sordellii ATCC 9714 GN=H477_3144 PE=4 SV=1			0	99	HDNSNCVVFYFNTLSGDLVVPADGR	Carbamidomethyl(C)@6; Deamidated(N)@12			-0.0782702	2796.2	933.075	2796.28	933.101	3	14	1.1.1.3744.2	77.0618	89.56	86.76	77.22	2.28	3666.07
1	35.66	35.66	89.51	87.27	87.27	tr|T0DXD7|T0DXD7_CLOSO	Uncharacterized protein OS=Paeniclostridium sordellii ATCC 9714 GN=H477_3144 PE=4 SV=1			0	99	HDNSNCVVFYFNTLSGDLVVPADGR	Deamidated(N)@3; Carbamidomethyl(C)@6			-0.0782702	2796.2	933.075	2796.28	933.101	3	14	1.1.1.3744.2	77.0618	89.56	86.76	77.22	2.28	3666.07
1	35.66	35.66	89.51	87.27	87.27	tr|T0DXD7|T0DXD7_CLOSO	Uncharacterized protein OS=Paeniclostridium sordellii ATCC 9714 GN=H477_3144 PE=4 SV=1			0	99	HDNSNCVVFYFNTLSGDLVVPADGR	Deamidated(N)@5; Carbamidomethyl(C)@6			-0.0782702	2796.2	933.075	2796.28	933.101	3	14	1.1.1.3776.2	77.8354	89.56	84.85	77.22	2.28	4111.13
1	35.66	35.66	89.51	87.27	87.27	tr|T0DXD7|T0DXD7_CLOSO	Uncharacterized protein OS=Paeniclostridium sordellii ATCC 9714 GN=H477_3144 PE=4 SV=1			0	99	HDNSNCVVFYFNTLSGDLVVPADGR	Carbamidomethyl(C)@6; Deamidated(N)@12			-0.0782702	2796.2	933.075	2796.28	933.101	3	13	1.1.1.3776.2	77.8354	89.56	84.85	77.22	2.28	4111.13
1	35.66	35.66	89.51	87.27	87.27	tr|T0DXD7|T0DXD7_CLOSO	Uncharacterized protein OS=Paeniclostridium sordellii ATCC 9714 GN=H477_3144 PE=4 SV=1			0	99	HDNSNCVVFYFNTLSGDLVVPADGR	Deamidated(N)@3; Carbamidomethyl(C)@6			-0.0782702	2796.2	933.075	2796.28	933.101	3	14	1.1.1.3776.2	77.8354	89.56	84.85	77.22	2.28	4111.13
1	35.66	35.66	89.51	87.27	87.27	tr|T0DXD7|T0DXD7_CLOSO	Uncharacterized protein OS=Paeniclostridium sordellii ATCC 9714 GN=H477_3144 PE=4 SV=1			0	99	INPGTTSLEQLK				-0.0227164	1299.68	650.848	1299.7	650.859	2	12	1.1.1.2905.2	30.9318	2601.09	2229.87	31.01	0.23	50422
1	35.66	35.66	89.51	87.27	87.27	tr|T0DXD7|T0DXD7_CLOSO	Uncharacterized protein OS=Paeniclostridium sordellii ATCC 9714 GN=H477_3144 PE=4 SV=1			0	98.46	INPGTTSLEQLKIEKVDR	Carbamyl(K)@12; Carbamyl(K)@15		missed K-I@12; missed K-V@15	0.0145553	2126.15	709.723	2126.13	709.718	3	16	1.1.1.2971.3	38.4639	761.33	722.79	38.5	0.23	30637
1	35.66	35.66	89.51	87.27	87.27	tr|T0DXD7|T0DXD7_CLOSO	Uncharacterized protein OS=Paeniclostridium sordellii ATCC 9714 GN=H477_3144 PE=4 SV=1			0	95.88	INPGTTSLEQLKIEKVDR	Carbamyl(K)@12		missed K-I@12; missed K-V@15	0.041943	2083.17	695.397	2083.13	695.383	3	13	1.1.1.2939.4	34.8627	273.99	255.92	34.76	0.23	10779.1
1	35.66	35.66	89.51	87.27	87.27	tr|T0DXD7|T0DXD7_CLOSO	Uncharacterized protein OS=Paeniclostridium sordellii ATCC 9714 GN=H477_3144 PE=4 SV=1			0	95.88	INPGTTSLEQLKIEKVDR	Carbamyl(K)@15		missed K-I@12; missed K-V@15	0.041943	2083.17	695.397	2083.13	695.383	3	13	1.1.1.2939.4	34.8627	273.99	255.92	34.76	0.23	10779.1
1	35.66	35.66	89.51	87.27	87.27	tr|T0DXD7|T0DXD7_CLOSO	Uncharacterized protein OS=Paeniclostridium sordellii ATCC 9714 GN=H477_3144 PE=4 SV=1			0	96.16	INPGTTSLEQLKIEKVDRK	Malonyl(K)@12	Malonyl(K)@62	missed K-I@12; missed K-V@15; missed R-K@18	0.0315187	2254.25	752.423	2254.22	752.413	3	14	1.1.1.2953.2	36.3842	475	441.26	36.45	0.34	20190.1
1	35.66	35.66	89.51	87.27	87.27	tr|T0DXD7|T0DXD7_CLOSO	Uncharacterized protein OS=Paeniclostridium sordellii ATCC 9714 GN=H477_3144 PE=4 SV=1			0	99	KSNGDDLDFKYELGNLCGPLPSSAR	Carbamyl@N-term; Deamidated(N)@3; Carbamyl(K)@10; Carbamidomethyl(C)@17		missed K-S@1; missed K-Y@10	0.0969248	2839.41	947.476	2839.31	947.443	3	16	1.1.1.3029.3	45.0508	397.25	195.54	44.76	0.45	8481.13
1	35.66	35.66	89.51	87.27	87.27	tr|T0DXD7|T0DXD7_CLOSO	Uncharacterized protein OS=Paeniclostridium sordellii ATCC 9714 GN=H477_3144 PE=4 SV=1			0	87.42	KSNGDDLDFKYELGNLCGPLPSSAR	Delta:H(2)C(2)(K)@1; Deamidated(N)@3; Oxidation(Y)@11; Deamidated(N)@15; Carbamidomethyl(C)@17	Oxidation(Y)@20	missed K-S@1; missed K-Y@10	0.0952801	2796.39	933.136	2796.29	933.104	3	19	1.1.1.2997.2	41.3827	553.61	426.96	41.47	0.34	13069.1
1	35.66	35.66	89.51	87.27	87.27	tr|T0DXD7|T0DXD7_CLOSO	Uncharacterized protein OS=Paeniclostridium sordellii ATCC 9714 GN=H477_3144 PE=4 SV=1			0	46.98	KSNGDDLDFKYELGNLCGPLPSSAR	Delta:H(2)C(2)(K)@1; Deamidated(N)@3; Oxidation(F)@9; Deamidated(N)@15; Carbamidomethyl(C)@17	Oxidation(F)@18	missed K-S@1; missed K-Y@10	0.0952801	2796.39	933.136	2796.29	933.104	3	19	1.1.1.2997.2	41.3827	553.61	426.96	41.47	0.34	13069.1
1	35.66	35.66	89.51	87.27	87.27	tr|T0DXD7|T0DXD7_CLOSO	Uncharacterized protein OS=Paeniclostridium sordellii ATCC 9714 GN=H477_3144 PE=4 SV=1			0	39.87	KSNGDDLDFKYELGNLCGPLPSSAR	Delta:H(2)C(2)(K)@1; Deamidated(N)@3; Oxidation(D)@8; Deamidated(N)@15; Carbamidomethyl(C)@17	Oxidation(D)@17	missed K-S@1; missed K-Y@10	0.0952801	2796.39	933.136	2796.29	933.104	3	19	1.1.1.2997.2	41.3827	553.61	426.96	41.47	0.34	13069.1
1	35.66	35.66	89.51	87.27	87.27	tr|T0DXD7|T0DXD7_CLOSO	Uncharacterized protein OS=Paeniclostridium sordellii ATCC 9714 GN=H477_3144 PE=4 SV=1			0	98.46	KSQKCKSVFEYDVCGQLNR	Carbamidomethyl@N-term; Carbamidomethyl(C)@5; Carboxyethyl(K)@6; Carbamidomethyl(C)@14	Carboxyethyl(K)@74	missed K-S@1; missed K-C@4; missed K-S@6	-0.00858619	2474.16	825.727	2474.17	825.73	3	12	1.1.1.3731.2	76.5165	102.59	96.08	76.48	1.05	1781.07
1	35.66	35.66	89.51	87.27	87.27	tr|T0DXD7|T0DXD7_CLOSO	Uncharacterized protein OS=Paeniclostridium sordellii ATCC 9714 GN=H477_3144 PE=4 SV=1			0	45.16	KSQKCKSVFEYDVCGQLNR	Lys-add@N-term; Deamidated(Q)@3; Carbamidomethyl(C)@5; Carbamidomethyl(C)@14		missed K-S@1; missed K-C@4; missed K-S@6	-0.015862	2474.19	825.737	2474.2	825.742	3	15	1.1.1.2958.4	37.0213	650.1	640.13	37.03	0.23	19251.2
1	35.66	35.66	89.51	87.27	87.27	tr|T0DXD7|T0DXD7_CLOSO	Uncharacterized protein OS=Paeniclostridium sordellii ATCC 9714 GN=H477_3144 PE=4 SV=1			0	39.87	KSQKCKSVFEYDVCGQLNR	Lys-add@N-term; Deamidated(Q)@3; Carbamidomethyl(C)@5; Carbamidomethyl(C)@14		missed K-S@1; missed K-C@4; missed K-S@6	-0.0449717	2474.16	825.727	2474.2	825.742	3	11	1.1.1.3731.2	76.5165	102.59	96.08	76.48	1.05	1781.07
1	35.66	35.66	89.51	87.27	87.27	tr|T0DXD7|T0DXD7_CLOSO	Uncharacterized protein OS=Paeniclostridium sordellii ATCC 9714 GN=H477_3144 PE=4 SV=1			0	99	LVDTFGSVCDFSQFTGK	Carbamidomethyl(C)@9			-0.0363495	1906.84	954.428	1906.88	954.446	2	19	1.1.1.3003.4	42.1329	3654.35	2163.92	42.37	0.45	80997.1
1	35.66	35.66	89.51	87.27	87.27	tr|T0DXD7|T0DXD7_CLOSO	Uncharacterized protein OS=Paeniclostridium sordellii ATCC 9714 GN=H477_3144 PE=4 SV=1			0	99	LVDTFGSVCDFSQFTGK	Oxidation(F)@5; Carbamidomethyl(C)@9	Oxidation(F)@239		-0.00906832	1922.86	962.439	1922.87	962.443	2	18	1.1.1.3005.2	42.2911	220.4	208.26	42.37	0.57	15977
1	35.66	35.66	89.51	87.27	87.27	tr|T0DXD7|T0DXD7_CLOSO	Uncharacterized protein OS=Paeniclostridium sordellii ATCC 9714 GN=H477_3144 PE=4 SV=1			0	99	LVDTFGSVCDFSQFTGK	Carbamidomethyl(C)@9			0.0112514	1906.89	954.452	1906.88	954.446	2	19	1.1.1.3017.4	43.7228	257.82	197.84	43.5	0.79	8170.07
1	35.66	35.66	89.51	87.27	87.27	tr|T0DXD7|T0DXD7_CLOSO	Uncharacterized protein OS=Paeniclostridium sordellii ATCC 9714 GN=H477_3144 PE=4 SV=1			0	99	LVDTFGSVCDFSQFTGK	Carbamidomethyl(C)@9			-0.0363495	1906.84	954.428	1906.88	954.446	2	20	1.1.1.3006.2	42.4047	3654.35	3563.39	42.37	0.45	252097
1	35.66	35.66	89.51	87.27	87.27	tr|T0DXD7|T0DXD7_CLOSO	Uncharacterized protein OS=Paeniclostridium sordellii ATCC 9714 GN=H477_3144 PE=4 SV=1			0	99	LVDTFGSVCDFSQFTGK	Carbamidomethyl(C)@9			0.0112514	1906.89	954.452	1906.88	954.446	2	15	1.1.1.3013.3	43.2342	257.82	192.91	43.5	0.79	10644
1	35.66	35.66	89.51	87.27	87.27	tr|T0DXD7|T0DXD7_CLOSO	Uncharacterized protein OS=Paeniclostridium sordellii ATCC 9714 GN=H477_3144 PE=4 SV=1			0	99	LVDTFGSVCDFSQFTGK	Carbamidomethyl(C)@9			-0.0363495	1906.84	954.428	1906.88	954.446	2	14	1.1.1.3000.4	41.7923	3654.35	191.03	42.37	0.45	10815.1
1	35.66	35.66	89.51	87.27	87.27	tr|T0DXD7|T0DXD7_CLOSO	Uncharacterized protein OS=Paeniclostridium sordellii ATCC 9714 GN=H477_3144 PE=4 SV=1			0	95.88	LVDTFGSVCDFSQFTGK	Carbamidomethyl(C)@9			0.0499423	1906.93	954.471	1906.88	954.446	2	10	1.1.1.3275.4	70.6384	75.2	72.25	69.74	2.41	1963.13
1	35.66	35.66	89.51	87.27	87.27	tr|T0DXD7|T0DXD7_CLOSO	Uncharacterized protein OS=Paeniclostridium sordellii ATCC 9714 GN=H477_3144 PE=4 SV=1			0	56.24	LVDTFGSVCDFSQFTGK	Carbamidomethyl(C)@9			0.0499423	1906.93	954.471	1906.88	954.446	2	8	1.1.1.3281.4	71.2505	75.2	55.77	69.74	2.41	1283.13
1	35.66	35.66	89.51	87.27	87.27	tr|T0DXD7|T0DXD7_CLOSO	Uncharacterized protein OS=Paeniclostridium sordellii ATCC 9714 GN=H477_3144 PE=4 SV=1			0	99	MVNNKPCYELDIPNGIDLVLCLQNVVSALIEEQIIVLGGPTR	Deamidated(N)@3; Carbamidomethyl(C)@7; Carbamidomethyl(C)@21			0.109192	4707.54	1570.19	4707.43	1570.15	3	16	1.1.1.3271.4	70.1843	272.13	229.36	69.97	0.57	5336.19
1	35.66	35.66	89.51	87.27	87.27	tr|T0DXD7|T0DXD7_CLOSO	Uncharacterized protein OS=Paeniclostridium sordellii ATCC 9714 GN=H477_3144 PE=4 SV=1			0	99	QDFQTQLTVDCIGK	Carbamidomethyl(C)@11			0.00207988	1651.79	826.902	1651.79	826.901	2	15	1.1.1.2934.2	34.2259	1209.15	982.6	34.31	0.34	24391.2
1	35.66	35.66	89.51	87.27	87.27	tr|T0DXD7|T0DXD7_CLOSO	Uncharacterized protein OS=Paeniclostridium sordellii ATCC 9714 GN=H477_3144 PE=4 SV=1			0	99	QDFQTQLTVDCIGK	Carbamidomethyl(C)@11			0.00207988	1651.79	826.902	1651.79	826.901	2	14	1.1.1.2937.3	34.6011	1209.15	389.63	34.31	0.34	9264.06
1	35.66	35.66	89.51	87.27	87.27	tr|T0DXD7|T0DXD7_CLOSO	Uncharacterized protein OS=Paeniclostridium sordellii ATCC 9714 GN=H477_3144 PE=4 SV=1			0	98.46	QDFQTQLTVDCIGKGVITQK	Carbamidomethyl(C)@11; Carbamyl(K)@14		missed K-G@14	0.00586624	2321.17	774.732	2321.17	774.73	3	12	1.1.1.3814.2	78.9807	91.96	85.22	77.94	3.02	2518.13
1	35.66	35.66	89.51	87.27	87.27	tr|T0DXD7|T0DXD7_CLOSO	Uncharacterized protein OS=Paeniclostridium sordellii ATCC 9714 GN=H477_3144 PE=4 SV=1			0	66.97	QDFQTQLTVDCIGKGVITQK	Carbamidomethyl(C)@11; Carbamyl(K)@14		missed K-G@14	0.00586624	2321.17	774.732	2321.17	774.73	3	10	1.1.1.3775.2	77.7908	91.96	91.46	77.94	3.02	2723.19
1	35.66	35.66	89.51	87.27	87.27	tr|T0DXD7|T0DXD7_CLOSO	Uncharacterized protein OS=Paeniclostridium sordellii ATCC 9714 GN=H477_3144 PE=4 SV=1			0	65.26	QDFQTQLTVDCIGKGVITQK	Carbamidomethyl(C)@11; Carbamyl(K)@14		missed K-G@14	0.00586624	2321.17	774.732	2321.17	774.73	3	11	1.1.1.3796.2	78.5218	91.96	86.19	77.94	3.02	2830.13
1	35.66	35.66	89.51	87.27	87.27	tr|T0DXD7|T0DXD7_CLOSO	Uncharacterized protein OS=Paeniclostridium sordellii ATCC 9714 GN=H477_3144 PE=4 SV=1			0	48.81	QDFQTQLTVDCIGKGVITQK	Carbamidomethyl(C)@11; Carbamyl(K)@14		missed K-G@14	0.00586624	2321.17	774.732	2321.17	774.73	3	10	1.1.1.3809.2	78.8609	91.96	87.49	77.94	3.02	2580.07
1	35.66	35.66	89.51	87.27	87.27	tr|T0DXD7|T0DXD7_CLOSO	Uncharacterized protein OS=Paeniclostridium sordellii ATCC 9714 GN=H477_3144 PE=4 SV=1			0	16.91	QDFQTQLTVDCIGKGVITQK	Carbamidomethyl(C)@11; Carbamyl(K)@14		missed K-G@14	0.00586624	2321.17	774.732	2321.17	774.73	3	9	1.1.1.3785.2	78.1339	91.96	91.61	77.94	3.02	2840.02
1	35.66	35.66	89.51	87.27	87.27	tr|T0DXD7|T0DXD7_CLOSO	Uncharacterized protein OS=Paeniclostridium sordellii ATCC 9714 GN=H477_3144 PE=4 SV=1			0	99	SNGDDLDFKYELGNLCGPLPSSAR	Deamidated(N)@2; Carbamidomethyl(C)@16		missed K-Y@9	0.0573977	2625.26	876.094	2625.2	876.075	3	24	1.1.1.3001.2	41.8368	471.17	459.02	41.81	0.34	20145.1
1	35.66	35.66	89.51	87.27	87.27	tr|T0DXD7|T0DXD7_CLOSO	Uncharacterized protein OS=Paeniclostridium sordellii ATCC 9714 GN=H477_3144 PE=4 SV=1			0	99	SNGDDLDFKYELGNLCGPLPSSAR	Deamidated(N)@2; Carbamyl(K)@9; Carbamidomethyl(C)@16		missed K-Y@9	0.101182	2668.31	890.443	2668.21	890.41	3	20	1.1.1.3030.4	45.1989	250.99	217.26	45.09	0.79	10444.2
1	35.66	35.66	89.51	87.27	87.27	tr|T0DXD7|T0DXD7_CLOSO	Uncharacterized protein OS=Paeniclostridium sordellii ATCC 9714 GN=H477_3144 PE=4 SV=1			0	99	SNGDDLDFKYELGNLCGPLPSSAR	Ammonia-loss(N)@2; Carbamyl(K)@9; Carbamidomethyl(C)@16		missed K-Y@9	0.107116	2650.3	884.442	2650.2	884.406	3	24	1.1.1.3046.3	46.9813	310.38	267.2	46.91	0.45	11375.9
1	35.66	35.66	89.51	87.27	87.27	tr|T0DXD7|T0DXD7_CLOSO	Uncharacterized protein OS=Paeniclostridium sordellii ATCC 9714 GN=H477_3144 PE=4 SV=1			0	16.91	SNGDDLDFKYELGNLCGPLPSSAR	Dehydrated(S)@1; Deamidated(N)@2; Carbamidomethyl(C)@16	Dehydrated(S)@11	missed K-Y@9	-0.0130086	2607.18	870.067	2607.19	870.071	3	23	1.1.1.3012.4	43.1551	295.09	281.36	43.06	0.34	14210
1	35.66	35.66	89.51	87.27	87.27	tr|T0DXD7|T0DXD7_CLOSO	Uncharacterized protein OS=Paeniclostridium sordellii ATCC 9714 GN=H477_3144 PE=4 SV=1			0	16.91	SNGDDLDFKYELGNLCGPLPSSAR	Dehydrated(S)@1; Deamidated(N)@2; Carbamyl(K)@9; Carbamidomethyl(C)@16	Dehydrated(S)@11	missed K-Y@9	0.107116	2650.3	884.442	2650.2	884.406	3	24	1.1.1.3046.3	46.9813	310.38	267.2	46.91	0.45	11375.9
1	35.66	35.66	89.51	87.27	87.27	tr|T0DXD7|T0DXD7_CLOSO	Uncharacterized protein OS=Paeniclostridium sordellii ATCC 9714 GN=H477_3144 PE=4 SV=1			0	48.81	SQKCKSVFEYDVCGQLNR	Carbamidomethyl(C)@4; Hex(S)@6; Carbamidomethyl(C)@13	Hex(S)@75	missed K-C@3; missed K-S@5	-0.0742267	2379.01	794.01	2379.08	794.035	3	9	1.1.1.3726.3	76.328	42.29	19.57	77.22	2.94	981.253
1	35.66	35.66	89.51	87.27	87.27	tr|T0DXD7|T0DXD7_CLOSO	Uncharacterized protein OS=Paeniclostridium sordellii ATCC 9714 GN=H477_3144 PE=4 SV=1			0	48.81	SQKCKSVFEYDVCGQLNR	Hex(S)@1; Carbamidomethyl(C)@4; Carbamidomethyl(C)@13	Hex(S)@70	missed K-C@3; missed K-S@5	-0.0742267	2379.01	794.01	2379.08	794.035	3	9	1.1.1.3726.3	76.328	42.29	19.57	77.22	2.94	981.253
1	35.66	35.66	89.51	87.27	87.27	tr|T0DXD7|T0DXD7_CLOSO	Uncharacterized protein OS=Paeniclostridium sordellii ATCC 9714 GN=H477_3144 PE=4 SV=1			0	99	SVFEYDVCGQLNR	Carbamidomethyl(C)@8			0.00303607	1585.72	793.869	1585.72	793.867	2	17	1.1.1.2944.3	35.3963	1585.68	1274.64	35.22	0.34	27374.1
1	35.66	35.66	89.51	87.27	87.27	tr|T0DXD7|T0DXD7_CLOSO	Uncharacterized protein OS=Paeniclostridium sordellii ATCC 9714 GN=H477_3144 PE=4 SV=1			0	99	SVFEYDVCGQLNR	Carbamidomethyl(C)@8			0.00291401	1585.72	793.869	1585.72	793.867	2	11	1.1.1.3790.2	78.3227	67.99	61.68	77.44	2.62	1967.07
1	35.66	35.66	89.51	87.27	87.27	tr|T0DXD7|T0DXD7_CLOSO	Uncharacterized protein OS=Paeniclostridium sordellii ATCC 9714 GN=H477_3144 PE=4 SV=1			0	99	SVFEYDVCGQLNR	Carbamidomethyl(C)@8			-0.00428712	1585.72	793.865	1585.72	793.867	2	11	1.1.1.3243.4	67.0761	75.72	75.62	67.23	1.41	2059.13
1	35.66	35.66	89.51	87.27	87.27	tr|T0DXD7|T0DXD7_CLOSO	Uncharacterized protein OS=Paeniclostridium sordellii ATCC 9714 GN=H477_3144 PE=4 SV=1			0	99	SVFEYDVCGQLNR	Carbamidomethyl(C)@8			0.00291401	1585.72	793.869	1585.72	793.867	2	11	1.1.1.3769.2	77.5919	67.99	63.76	77.44	2.62	1975.95
1	35.66	35.66	89.51	87.27	87.27	tr|T0DXD7|T0DXD7_CLOSO	Uncharacterized protein OS=Paeniclostridium sordellii ATCC 9714 GN=H477_3144 PE=4 SV=1			0	99	SVFEYDVCGQLNR	Carbamidomethyl(C)@8			0.00291401	1585.72	793.869	1585.72	793.867	2	12	1.1.1.3779.2	77.9694	67.99	61.87	77.44	2.62	2033.19
1	35.66	35.66	89.51	87.27	87.27	tr|T0DXD7|T0DXD7_CLOSO	Uncharacterized protein OS=Paeniclostridium sordellii ATCC 9714 GN=H477_3144 PE=4 SV=1			0	99	SVFEYDVCGQLNR	Carbamidomethyl(C)@8			0.00291401	1585.72	793.869	1585.72	793.867	2	11	1.1.1.3748.2	77.1715	67.99	61.64	77.44	2.62	2083.07
1	35.66	35.66	89.51	87.27	87.27	tr|T0DXD7|T0DXD7_CLOSO	Uncharacterized protein OS=Paeniclostridium sordellii ATCC 9714 GN=H477_3144 PE=4 SV=1			0	97.3	SVFEYDVCGQLNR	Carbamidomethyl(C)@8			0.0678463	1585.79	793.901	1585.72	793.867	2	9	1.1.1.3309.2	71.8787	73.75	51.14	70.65	2.83	753.131
1	35.66	35.66	89.51	87.27	87.27	tr|T0DXD7|T0DXD7_CLOSO	Uncharacterized protein OS=Paeniclostridium sordellii ATCC 9714 GN=H477_3144 PE=4 SV=1			0	96.67	SVFEYDVCGQLNR	Carbamidomethyl(C)@8			0.00291401	1585.72	793.869	1585.72	793.867	2	9	1.1.1.3811.2	78.9157	67.99	44.67	77.44	2.62	1697.25
1	35.66	35.66	89.51	87.27	87.27	tr|T0DXD7|T0DXD7_CLOSO	Uncharacterized protein OS=Paeniclostridium sordellii ATCC 9714 GN=H477_3144 PE=4 SV=1			0	87.42	SVFEYDVCGQLNR	Carbamidomethyl(C)@8			0.0678463	1585.79	793.901	1585.72	793.867	2	8	1.1.1.3281.3	71.216	73.75	61.7	70.65	2.83	1052.12
1	35.66	35.66	89.51	87.27	87.27	tr|T0DXD7|T0DXD7_CLOSO	Uncharacterized protein OS=Paeniclostridium sordellii ATCC 9714 GN=H477_3144 PE=4 SV=1			0	63.51	TLSGDLVVPADGR	Lys-add@N-term		cleaved N-T@N-term	-0.0584525	1426.72	714.367	1426.78	714.396	2	10	1.1.1.3074.4	50.1954	262.1	258.21	50.21	0.57	8303.13
1	35.66	35.66	89.51	87.27	87.27	tr|T0DXD7|T0DXD7_CLOSO	Uncharacterized protein OS=Paeniclostridium sordellii ATCC 9714 GN=H477_3144 PE=4 SV=1			0	45.16	VFTDGKKSNGDDLDFKYELGNLCGPLPSSAR	GG(K)@16; Oxidation(Y)@17; Carbamidomethyl(C)@23	GG(K)@19; Oxidation(Y)@20	missed K-K@6; missed K-S@7; missed K-Y@16	-0.080384	3529.6	1177.54	3529.68	1177.57	3	19	1.1.1.3037.4	45.994	296.3	290.5	45.89	0.45	11405.1
1	35.66	35.66	89.51	87.27	87.27	tr|T0DXD7|T0DXD7_CLOSO	Uncharacterized protein OS=Paeniclostridium sordellii ATCC 9714 GN=H477_3144 PE=4 SV=1			0	20.59	VFTDGKKSNGDDLDFKYELGNLCGPLPSSAR	Oxidation(F)@15; GG(K)@16; Carbamidomethyl(C)@23	Oxidation(F)@18; GG(K)@19	missed K-K@6; missed K-S@7; missed K-Y@16	-0.080384	3529.6	1177.54	3529.68	1177.57	3	19	1.1.1.3037.4	45.994	296.3	290.5	45.89	0.45	11405.1
1	35.66	35.66	89.51	87.27	87.27	tr|T0DXD7|T0DXD7_CLOSO	Uncharacterized protein OS=Paeniclostridium sordellii ATCC 9714 GN=H477_3144 PE=4 SV=1			0	99	YELGNLCGPLPSSAR	Carbamidomethyl(C)@7			-0.00299057	1632.79	817.402	1632.79	817.404	2	19	1.1.1.2948.2	35.8163	1837.18	1381.05	35.91	0.34	24329.1
2	29.03	29.03	74.24	74.24	74.24	tr|T2RG98|T2RG98_CLOSO	Uncharacterized protein OS=Paeniclostridium sordellii ATCC 9714 GN=H477_4099 PE=4 SV=1			2	99	AQFDLKFVVKSIVPTTPFSGGTFSAR	Carbamyl(K)@6; Carbamyl(K)@10		missed K-F@6; missed K-S@10	0.0603679	2885.57	962.863	2885.51	962.843	3	18	1.1.1.3194.4	61.7871	1116.3	367.21	61.34	0.45	7707.13
2	29.03	29.03	74.24	74.24	74.24	tr|T2RG98|T2RG98_CLOSO	Uncharacterized protein OS=Paeniclostridium sordellii ATCC 9714 GN=H477_4099 PE=4 SV=1			2	99	EKGSTATLVQGPLDASIYNFQYIVEGFIGCDPFTAR	Carbamidomethyl(C)@30		missed K-G@2	0.0589642	3964	1322.34	3963.94	1322.32	3	24	1.1.1.3259.4	68.8229	699.95	695.25	68.83	0.23	55690.2
2	29.03	29.03	74.24	74.24	74.24	tr|T2RG98|T2RG98_CLOSO	Uncharacterized protein OS=Paeniclostridium sordellii ATCC 9714 GN=H477_4099 PE=4 SV=1			2	99	FPVTPSDAPDFLTNINLFSTICLPNTDDPLTLR	Carbamidomethyl(C)@22			-0.0283315	3703.82	1235.61	3703.84	1235.62	3	22	1.1.1.3206.2	63.0809	2724.09	2715.29	63.05	0.8	93573.1
2	29.03	29.03	74.24	74.24	74.24	tr|T2RG98|T2RG98_CLOSO	Uncharacterized protein OS=Paeniclostridium sordellii ATCC 9714 GN=H477_4099 PE=4 SV=1			2	99	FVVKSIVPTTPFSGGTFSAR	Carbamyl(K)@4		missed K-S@4	0.0342172	2140.17	714.396	2140.13	714.385	3	22	1.1.1.3031.2	45.2435	1902.35	1134.95	45.43	0.34	29729.2
2	29.03	29.03	74.24	74.24	74.24	tr|T2RG98|T2RG98_CLOSO	Uncharacterized protein OS=Paeniclostridium sordellii ATCC 9714 GN=H477_4099 PE=4 SV=1			2	99	GSTATLVQGPLDASIYNFQYIVEGFIGCDPFTAR	Carbamidomethyl(C)@28			0.108686	3706.91	1236.64	3706.8	1236.61	3	23	1.1.1.3262.4	69.1631	994.52	994.21	69.15	0.34	62844.1
2	29.03	29.03	74.24	74.24	74.24	tr|T2RG98|T2RG98_CLOSO	Uncharacterized protein OS=Paeniclostridium sordellii ATCC 9714 GN=H477_4099 PE=4 SV=1			2	99	IFDELLISEK				-0.0104774	1205.64	603.829	1205.65	603.834	2	13	1.1.1.2996.4	41.3381	132.91	132.71	41.35	1.14	5242.13
2	29.03	29.03	74.24	74.24	74.24	tr|T2RG98|T2RG98_CLOSO	Uncharacterized protein OS=Paeniclostridium sordellii ATCC 9714 GN=H477_4099 PE=4 SV=1			2	99	IFDELLISEKLYLTK	Carbamyl(K)@10		missed K-L@10	0.00290628	1867.04	623.353	1867.03	623.352	3	19	1.1.1.3086.4	51.5581	1848.07	1243.84	51.69	0.34	19951.1
2	29.03	29.03	74.24	74.24	74.24	tr|T2RG98|T2RG98_CLOSO	Uncharacterized protein OS=Paeniclostridium sordellii ATCC 9714 GN=H477_4099 PE=4 SV=1			2	99	IFDELLISEKLYLTKSDALVVYSAPAEFK	Malonyl(K)@15	Malonyl(K)@211	missed K-L@10; missed K-S@15	0.0546948	3387.83	1130.28	3387.77	1130.27	3	19	1.1.1.3214.2	63.9901	707.77	227.77	63.39	0.68	6730.13
2	29.03	29.03	74.24	74.24	74.24	tr|T2RG98|T2RG98_CLOSO	Uncharacterized protein OS=Paeniclostridium sordellii ATCC 9714 GN=H477_4099 PE=4 SV=1			2	99	LYLTKSDALVVYSAPAEFK	Carbamyl(K)@5		missed K-S@5	0.0182965	2157.15	1079.58	2157.14	1079.58	2	19	1.1.1.3026.2	44.6757	652.1	514.06	44.77	0.34	18152.1
2	29.03	29.03	74.24	74.24	74.24	tr|T2RG98|T2RG98_CLOSO	Uncharacterized protein OS=Paeniclostridium sordellii ATCC 9714 GN=H477_4099 PE=4 SV=1			2	99	PMGCPPYTAGAPVCIEK	Carbamidomethyl(C)@4; Carbamidomethyl(C)@14		cleaved R-P@N-term	-0.0250995	1846.82	924.415	1846.84	924.428	2	23	1.1.1.2918.2	32.4085	2601.01	1379.35	32.6	0.34	19848.1
2	29.03	29.03	74.24	74.24	74.24	tr|T2RG98|T2RG98_CLOSO	Uncharacterized protein OS=Paeniclostridium sordellii ATCC 9714 GN=H477_4099 PE=4 SV=1			2	99	SDALVVYSAPAEFK				0.018077	1495.77	748.894	1495.76	748.885	2	18	1.1.1.2958.3	36.9868	1903.55	1392.85	36.81	0.34	30619.1
2	29.03	29.03	74.24	74.24	74.24	tr|T2RG98|T2RG98_CLOSO	Uncharacterized protein OS=Paeniclostridium sordellii ATCC 9714 GN=H477_4099 PE=4 SV=1			2	99	SIAPQVFTVDPR			cleaved R-P@C-term	-0.0371837	1328.67	665.343	1328.71	665.362	2	18	1.1.1.2944.2	35.3618	4909.18	4728.79	35.32	0.45	172321
2	29.03	29.03	74.24	74.24	74.24	tr|T2RG98|T2RG98_CLOSO	Uncharacterized protein OS=Paeniclostridium sordellii ATCC 9714 GN=H477_4099 PE=4 SV=1			2	99	SIVPTTPFSGGTFSAR				-0.0176846	1623.81	812.911	1623.83	812.92	2	19	1.1.1.2973.2	38.6565	2847.84	2173.95	38.75	0.34	63760.2
2	29.03	29.03	74.24	74.24	74.24	tr|T2RG98|T2RG98_CLOSO	Uncharacterized protein OS=Paeniclostridium sordellii ATCC 9714 GN=H477_4099 PE=4 SV=1			1.92082	99	CVNQQIPR	Carbamidomethyl(C)@1			-0.0214974	1013.49	507.75	1013.51	507.761	2	10	1.1.1.2867.2	26.6145	1426.33	1380.69	26.68	0.23	44264.3
2	29.03	29.03	74.24	74.24	74.24	tr|T2RG98|T2RG98_CLOSO	Uncharacterized protein OS=Paeniclostridium sordellii ATCC 9714 GN=H477_4099 PE=4 SV=1			0.705534	99	IFDFKCVNQQIPR	Carbamyl(K)@5; Carbamidomethyl(C)@6		missed K-C@5	-0.00767533	1706.85	854.432	1706.86	854.435	2	15	1.1.1.2976.3	39.0318	3431.56	2023.88	39.19	0.34	60063.5
2	29.03	29.03	74.24	74.24	74.24	tr|T2RG98|T2RG98_CLOSO	Uncharacterized protein OS=Paeniclostridium sordellii ATCC 9714 GN=H477_4099 PE=4 SV=1			0.357535	99	SDALVVYSAPAEFKHHEK	Carbamyl(K)@14		missed K-H@14	0.0236044	2070.04	691.021	2070.02	691.013	3	16	1.1.1.2925.2	33.2034	918.18	713.56	33.29	0.34	16997.2
2	29.03	29.03	74.24	74.24	74.24	tr|T2RG98|T2RG98_CLOSO	Uncharacterized protein OS=Paeniclostridium sordellii ATCC 9714 GN=H477_4099 PE=4 SV=1			0.0457575	97.3	IGCDPFTAR	Carbamidomethyl(C)@3		cleaved F-I@N-term	-0.00780964	1035.47	518.744	1035.48	518.748	2	11	1.1.1.2906.2	31.0454	349.19	337.62	31.02	0.34	13494.1
2	29.03	29.03	74.24	74.24	74.24	tr|T2RG98|T2RG98_CLOSO	Uncharacterized protein OS=Paeniclostridium sordellii ATCC 9714 GN=H477_4099 PE=4 SV=1			0.00130484	77.65	AQFDLKFVVK	Carbamyl(K)@6		missed K-F@6	-0.0239564	1236.66	619.339	1236.69	619.351	2	10	1.1.1.3000.2	41.7233	618.79	330.23	41.92	0.34	7695.07
2	29.03	29.03	74.24	74.24	74.24	tr|T2RG98|T2RG98_CLOSO	Uncharacterized protein OS=Paeniclostridium sordellii ATCC 9714 GN=H477_4099 PE=4 SV=1			0.000434512	99	LYLTKSDALVVYSAPAEFKHHEK	Carbamyl(K)@5; Carbamyl(K)@19		missed K-S@5; missed K-H@19	0.0502522	2731.45	683.869	2731.4	683.857	4	15	1.1.1.2994.4	41.111	487.47	484.22	41.11	0.34	17463.1
2	29.03	29.03	74.24	74.24	74.24	tr|T2RG98|T2RG98_CLOSO	Uncharacterized protein OS=Paeniclostridium sordellii ATCC 9714 GN=H477_4099 PE=4 SV=1			0	31.84	AQFDLKFVVK	Carbamyl(K)@6		missed K-F@6	-0.0239564	1236.66	619.339	1236.69	619.351	2	10	1.1.1.3003.2	42.0639	618.79	564.18	41.92	0.34	15837
2	29.03	29.03	74.24	74.24	74.24	tr|T2RG98|T2RG98_CLOSO	Uncharacterized protein OS=Paeniclostridium sordellii ATCC 9714 GN=H477_4099 PE=4 SV=1			0	99	AQFDLKFVVKSIVPTTPFSGGTFSAR	Carbamyl(K)@6; Carbamyl(K)@10		missed K-F@6; missed K-S@10	0.0603679	2885.57	962.863	2885.51	962.843	3	19	1.1.1.3191.2	61.3773	1116.3	1047.37	61.34	0.45	21427.7
2	29.03	29.03	74.24	74.24	74.24	tr|T2RG98|T2RG98_CLOSO	Uncharacterized protein OS=Paeniclostridium sordellii ATCC 9714 GN=H477_4099 PE=4 SV=1			0	99	AQFDLKFVVKSIVPTTPFSGGTFSAR	Carbamyl(K)@6; Carbamyl(K)@10		missed K-F@6; missed K-S@10	0.0603679	2885.57	962.863	2885.51	962.843	3	19	1.1.1.3197.4	62.1277	1116.3	180.28	61.34	0.45	5538.01
2	29.03	29.03	74.24	74.24	74.24	tr|T2RG98|T2RG98_CLOSO	Uncharacterized protein OS=Paeniclostridium sordellii ATCC 9714 GN=H477_4099 PE=4 SV=1			0	99	AQFDLKFVVKSIVPTTPFSGGTFSAR	Carbamyl(K)@6; Carbamyl(K)@10		missed K-F@6; missed K-S@10	0.0603679	2885.57	962.863	2885.51	962.843	3	18	1.1.1.3188.3	61.0712	1116.3	601.82	61.34	0.45	9607.13
2	29.03	29.03	74.24	74.24	74.24	tr|T2RG98|T2RG98_CLOSO	Uncharacterized protein OS=Paeniclostridium sordellii ATCC 9714 GN=H477_4099 PE=4 SV=1			0	99	FPVTPSDAPDFLTNINLFSTICLPNTDDPLTLR	Carbamidomethyl(C)@22			-0.0283315	3703.82	1235.61	3703.84	1235.62	3	22	1.1.1.3200.4	62.4684	2724.09	852.43	63.05	0.8	20885
2	29.03	29.03	74.24	74.24	74.24	tr|T2RG98|T2RG98_CLOSO	Uncharacterized protein OS=Paeniclostridium sordellii ATCC 9714 GN=H477_4099 PE=4 SV=1			0	99	FPVTPSDAPDFLTNINLFSTICLPNTDDPLTLR	Carbamidomethyl(C)@22			-0.0283315	3703.82	1235.61	3703.84	1235.62	3	23	1.1.1.3203.2	62.74	2724.09	2025.1	63.05	0.8	57031.2
2	29.03	29.03	74.24	74.24	74.24	tr|T2RG98|T2RG98_CLOSO	Uncharacterized protein OS=Paeniclostridium sordellii ATCC 9714 GN=H477_4099 PE=4 SV=1			0	99	FPVTPSDAPDFLTNINLFSTICLPNTDDPLTLR	Carbamidomethyl(C)@22			-0.0268668	3703.82	1235.61	3703.84	1235.62	3	23	1.1.1.3212.2	63.763	2689.01	2616.14	63.61	0.91	73343.9
2	29.03	29.03	74.24	74.24	74.24	tr|T2RG98|T2RG98_CLOSO	Uncharacterized protein OS=Paeniclostridium sordellii ATCC 9714 GN=H477_4099 PE=4 SV=1			0	99	FPVTPSDAPDFLTNINLFSTICLPNTDDPLTLR	Carbamidomethyl(C)@22			-0.0268668	3703.82	1235.61	3703.84	1235.62	3	22	1.1.1.3218.2	64.4442	2689.01	1199.24	63.61	0.91	26202.1
2	29.03	29.03	74.24	74.24	74.24	tr|T2RG98|T2RG98_CLOSO	Uncharacterized protein OS=Paeniclostridium sordellii ATCC 9714 GN=H477_4099 PE=4 SV=1			0	99	FPVTPSDAPDFLTNINLFSTICLPNTDDPLTLR	Carbamidomethyl(C)@22			-0.0268668	3703.82	1235.61	3703.84	1235.62	3	20	1.1.1.3221.2	64.785	2689.01	579.39	63.61	0.91	14738
2	29.03	29.03	74.24	74.24	74.24	tr|T2RG98|T2RG98_CLOSO	Uncharacterized protein OS=Paeniclostridium sordellii ATCC 9714 GN=H477_4099 PE=4 SV=1			0	99	FPVTPSDAPDFLTNINLFSTICLPNTDDPLTLR	Carbamidomethyl(C)@22			-0.0268668	3703.82	1235.61	3703.84	1235.62	3	22	1.1.1.3215.2	64.1036	2689.01	1996.34	63.61	0.91	49431
2	29.03	29.03	74.24	74.24	74.24	tr|T2RG98|T2RG98_CLOSO	Uncharacterized protein OS=Paeniclostridium sordellii ATCC 9714 GN=H477_4099 PE=4 SV=1			0	99	FPVTPSDAPDFLTNINLFSTICLPNTDDPLTLR	Carbamidomethyl(C)@22			-0.0268668	3703.82	1235.61	3703.84	1235.62	3	22	1.1.1.3209.2	63.4222	2689.01	2618.89	63.61	0.91	84321.4
2	29.03	29.03	74.24	74.24	74.24	tr|T2RG98|T2RG98_CLOSO	Uncharacterized protein OS=Paeniclostridium sordellii ATCC 9714 GN=H477_4099 PE=4 SV=1			0	45.16	FVVKSIVPTTPF	Carbamyl(K)@4		cleaved F-S@C-term; missed K-S@4	0.00168946	1376.77	689.393	1376.77	689.392	2	9	1.1.1.3052.3	47.6626	228.94	212.81	47.71	0.45	8761.13
2	29.03	29.03	74.24	74.24	74.24	tr|T2RG98|T2RG98_CLOSO	Uncharacterized protein OS=Paeniclostridium sordellii ATCC 9714 GN=H477_4099 PE=4 SV=1			0	99	FVVKSIVPTTPFSGGTFSAR	Carbamyl(K)@4		missed K-S@4	0.0342172	2140.17	714.396	2140.13	714.385	3	21	1.1.1.3034.2	45.5843	1902.35	1364.68	45.43	0.34	39614.3
2	29.03	29.03	74.24	74.24	74.24	tr|T2RG98|T2RG98_CLOSO	Uncharacterized protein OS=Paeniclostridium sordellii ATCC 9714 GN=H477_4099 PE=4 SV=1			0	99	FVVKSIVPTTPFSGGTFSAR	Carbamyl(K)@4		missed K-S@4	0.0342172	2140.17	714.396	2140.13	714.385	3	15	1.1.1.3037.2	45.925	1902.35	209.56	45.43	0.34	7544.13
2	29.03	29.03	74.24	74.24	74.24	tr|T2RG98|T2RG98_CLOSO	Uncharacterized protein OS=Paeniclostridium sordellii ATCC 9714 GN=H477_4099 PE=4 SV=1			0	71.85	FVVKSIVPTTPFSGGTFSAR	Acetyldeoxyhypusine(K)@4	Acetyldeoxyhypusine(K)@180	missed K-S@4	-0.0187185	2194.2	732.406	2194.22	732.412	3	12	1.1.1.3032.2	45.357	221.43	205.35	45.43	0.45	22224.1
2	29.03	29.03	74.24	74.24	74.24	tr|T2RG98|T2RG98_CLOSO	Uncharacterized protein OS=Paeniclostridium sordellii ATCC 9714 GN=H477_4099 PE=4 SV=1			0	99	IFDELLISEK				-0.0104774	1205.64	603.829	1205.65	603.834	2	14	1.1.1.2988.2	40.3607	2785.66	1670.34	40.2	0.34	46225.2
2	29.03	29.03	74.24	74.24	74.24	tr|T2RG98|T2RG98_CLOSO	Uncharacterized protein OS=Paeniclostridium sordellii ATCC 9714 GN=H477_4099 PE=4 SV=1			0	99	IFDELLISEK				-0.0104774	1205.64	603.829	1205.65	603.834	2	13	1.1.1.2991.3	40.7359	2785.66	134.14	40.2	0.34	6300.12
2	29.03	29.03	74.24	74.24	74.24	tr|T2RG98|T2RG98_CLOSO	Uncharacterized protein OS=Paeniclostridium sordellii ATCC 9714 GN=H477_4099 PE=4 SV=1			0	99	IFDELLISEK				-0.0104774	1205.64	603.829	1205.65	603.834	2	14	1.1.1.2985.2	40.0199	2785.66	1896.44	40.2	0.34	59004.2
2	29.03	29.03	74.24	74.24	74.24	tr|T2RG98|T2RG98_CLOSO	Uncharacterized protein OS=Paeniclostridium sordellii ATCC 9714 GN=H477_4099 PE=4 SV=1			0	99	IFDELLISEKLYLTK	Carbamyl(K)@10		missed K-L@10	0.00290628	1867.04	623.353	1867.03	623.352	3	17	1.1.1.3089.2	51.8299	1848.07	1627.22	51.69	0.34	34702.3
2	29.03	29.03	74.24	74.24	74.24	tr|T2RG98|T2RG98_CLOSO	Uncharacterized protein OS=Paeniclostridium sordellii ATCC 9714 GN=H477_4099 PE=4 SV=1			0	99	IFDELLISEKLYLTK	Carbamyl(K)@10		missed K-L@10	0.00290628	1867.04	623.353	1867.03	623.352	3	15	1.1.1.3092.3	52.205	1848.07	399.56	51.69	0.34	8344.06
2	29.03	29.03	74.24	74.24	74.24	tr|T2RG98|T2RG98_CLOSO	Uncharacterized protein OS=Paeniclostridium sordellii ATCC 9714 GN=H477_4099 PE=4 SV=1			0	99	IFDELLISEKLYLTK	Carbamyl(K)@10		missed K-L@10	0.00290628	1867.04	623.353	1867.03	623.352	3	13	1.1.1.3104.4	53.602	1848.07	109.62	51.69	0.34	2820.19
2	29.03	29.03	74.24	74.24	74.24	tr|T2RG98|T2RG98_CLOSO	Uncharacterized protein OS=Paeniclostridium sordellii ATCC 9714 GN=H477_4099 PE=4 SV=1			0	99	IFDELLISEKLYLTK	Carbamyl(K)@10		missed K-L@10	0.00290628	1867.04	623.353	1867.03	623.352	3	14	1.1.1.3113.4	54.6237	1848.07	82.85	51.69	0.34	2381.07
2	29.03	29.03	74.24	74.24	74.24	tr|T2RG98|T2RG98_CLOSO	Uncharacterized protein OS=Paeniclostridium sordellii ATCC 9714 GN=H477_4099 PE=4 SV=1			0	99	IFDELLISEKLYLTK	Carbamyl(K)@10		missed K-L@10	0.00290628	1867.04	623.353	1867.03	623.352	3	13	1.1.1.3101.2	53.1924	1848.07	120.04	51.69	0.34	3721.13
2	29.03	29.03	74.24	74.24	74.24	tr|T2RG98|T2RG98_CLOSO	Uncharacterized protein OS=Paeniclostridium sordellii ATCC 9714 GN=H477_4099 PE=4 SV=1			0	99	IFDELLISEKLYLTK	Carbamyl(K)@10		missed K-L@10	0.0570977	1867.09	623.371	1867.03	623.352	3	14	1.1.1.3267.4	69.7303	93.18	73.04	70.76	2.78	2129.13
2	29.03	29.03	74.24	74.24	74.24	tr|T2RG98|T2RG98_CLOSO	Uncharacterized protein OS=Paeniclostridium sordellii ATCC 9714 GN=H477_4099 PE=4 SV=1			0	99	IFDELLISEKLYLTK	Carbamyl(K)@10		missed K-L@10	0.00290628	1867.04	623.353	1867.03	623.352	3	13	1.1.1.3095.2	52.511	1848.07	214.9	51.69	0.34	4595.13
2	29.03	29.03	74.24	74.24	74.24	tr|T2RG98|T2RG98_CLOSO	Uncharacterized protein OS=Paeniclostridium sordellii ATCC 9714 GN=H477_4099 PE=4 SV=1			0	99	IFDELLISEKLYLTK	Carbamyl(K)@10		missed K-L@10	-0.051102	1866.98	623.335	1867.03	623.352	3	13	1.1.1.3254.2	68.1867	89.27	89.22	68.15	1.59	2349.13
2	29.03	29.03	74.24	74.24	74.24	tr|T2RG98|T2RG98_CLOSO	Uncharacterized protein OS=Paeniclostridium sordellii ATCC 9714 GN=H477_4099 PE=4 SV=1			0	99	IFDELLISEKLYLTK	Carbamyl(K)@10		missed K-L@10	0.00290628	1867.04	623.353	1867.03	623.352	3	12	1.1.1.3107.4	53.9425	1848.07	86.89	51.69	0.34	2512.13
2	29.03	29.03	74.24	74.24	74.24	tr|T2RG98|T2RG98_CLOSO	Uncharacterized protein OS=Paeniclostridium sordellii ATCC 9714 GN=H477_4099 PE=4 SV=1			0	99	IFDELLISEKLYLTK	Carbamyl(K)@10		missed K-L@10	0.00290628	1867.04	623.353	1867.03	623.352	3	12	1.1.1.3098.3	52.8862	1848.07	155.4	51.69	0.34	3822.13
2	29.03	29.03	74.24	74.24	74.24	tr|T2RG98|T2RG98_CLOSO	Uncharacterized protein OS=Paeniclostridium sordellii ATCC 9714 GN=H477_4099 PE=4 SV=1			0	98.98	IFDELLISEKLYLTK	Carbamyl(K)@10		missed K-L@10	-0.0421312	1866.99	623.338	1867.03	623.352	3	12	1.1.1.3758.2	77.3421	85.6	82.8	77.44	1.73	2325.19
2	29.03	29.03	74.24	74.24	74.24	tr|T2RG98|T2RG98_CLOSO	Uncharacterized protein OS=Paeniclostridium sordellii ATCC 9714 GN=H477_4099 PE=4 SV=1			0	98.46	IFDELLISEKLYLTK	Carbamyl(K)@10		missed K-L@10	-0.0668468	1866.97	623.33	1867.03	623.352	3	12	1.1.1.3232.2	65.9996	66.73	62.98	65.85	0.87	1840.13
2	29.03	29.03	74.24	74.24	74.24	tr|T2RG98|T2RG98_CLOSO	Uncharacterized protein OS=Paeniclostridium sordellii ATCC 9714 GN=H477_4099 PE=4 SV=1			0	98.46	IFDELLISEKLYLTK	Carbamyl(K)@10		missed K-L@10	-0.051102	1866.98	623.335	1867.03	623.352	3	11	1.1.1.3249.4	67.6882	89.27	76.74	68.15	1.59	1758.13
2	29.03	29.03	74.24	74.24	74.24	tr|T2RG98|T2RG98_CLOSO	Uncharacterized protein OS=Paeniclostridium sordellii ATCC 9714 GN=H477_4099 PE=4 SV=1			0	97.3	IFDELLISEKLYLTK	Carbamyl(K)@10		missed K-L@10	-0.0421312	1866.99	623.338	1867.03	623.352	3	12	1.1.1.3803.2	78.7309	85.6	56.04	77.44	1.73	1613.13
2	29.03	29.03	74.24	74.24	74.24	tr|T2RG98|T2RG98_CLOSO	Uncharacterized protein OS=Paeniclostridium sordellii ATCC 9714 GN=H477_4099 PE=4 SV=1			0	96.42	IFDELLISEKLYLTK	Carbamyl(K)@10		missed K-L@10	0.0570977	1867.09	623.371	1867.03	623.352	3	12	1.1.1.3274.4	70.5249	93.18	86.86	70.76	2.78	2331.13
2	29.03	29.03	74.24	74.24	74.24	tr|T2RG98|T2RG98_CLOSO	Uncharacterized protein OS=Paeniclostridium sordellii ATCC 9714 GN=H477_4099 PE=4 SV=1			0	96.42	IFDELLISEKLYLTK	Carbamyl(K)@10		missed K-L@10	-0.0421312	1866.99	623.338	1867.03	623.352	3	11	1.1.1.3792.2	78.3775	85.6	71.14	77.44	1.73	1785.13
2	29.03	29.03	74.24	74.24	74.24	tr|T2RG98|T2RG98_CLOSO	Uncharacterized protein OS=Paeniclostridium sordellii ATCC 9714 GN=H477_4099 PE=4 SV=1			0	80.22	IFDELLISEKLYLTK	Carbamyl(K)@10		missed K-L@10	-0.0421312	1866.99	623.338	1867.03	623.352	3	10	1.1.1.3772.2	77.6913	85.6	83.86	77.44	1.73	2141.13
2	29.03	29.03	74.24	74.24	74.24	tr|T2RG98|T2RG98_CLOSO	Uncharacterized protein OS=Paeniclostridium sordellii ATCC 9714 GN=H477_4099 PE=4 SV=1			0	76.28	IFDELLISEKLYLTK	Carbamyl(K)@10		missed K-L@10	-0.051102	1866.98	623.335	1867.03	623.352	3	11	1.1.1.3251.4	67.9152	89.27	82.29	68.15	1.59	1865.13
2	29.03	29.03	74.24	74.24	74.24	tr|T2RG98|T2RG98_CLOSO	Uncharacterized protein OS=Paeniclostridium sordellii ATCC 9714 GN=H477_4099 PE=4 SV=1			0	68.64	IFDELLISEKLYLTK	Carbamyl(K)@10		missed K-L@10	0.0499576	1867.08	623.369	1867.03	623.352	3	10	1.1.1.3404.2	72.9951	51.36	46.94	73.13	1.62	1219.19
2	29.03	29.03	74.24	74.24	74.24	tr|T2RG98|T2RG98_CLOSO	Uncharacterized protein OS=Paeniclostridium sordellii ATCC 9714 GN=H477_4099 PE=4 SV=1			0	65.26	IFDELLISEKLYLTK	Carbamyl(K)@10		missed K-L@10	0.0797057	1867.11	934.564	1867.03	934.524	2	10	1.1.1.3110.4	54.2831	136.59	108.41	53.38	2.8	4326.13
2	29.03	29.03	74.24	74.24	74.24	tr|T2RG98|T2RG98_CLOSO	Uncharacterized protein OS=Paeniclostridium sordellii ATCC 9714 GN=H477_4099 PE=4 SV=1			0	63.51	IFDELLISEKLYLTK	Carbamyl(K)@10		missed K-L@10	-0.0421312	1866.99	623.338	1867.03	623.352	3	9	1.1.1.3782.2	78.0344	85.6	78.21	77.44	1.73	1889.07
2	29.03	29.03	74.24	74.24	74.24	tr|T2RG98|T2RG98_CLOSO	Uncharacterized protein OS=Paeniclostridium sordellii ATCC 9714 GN=H477_4099 PE=4 SV=1			0	61.72	IFDELLISEKLYLTK	Carbamyl(K)@10		missed K-L@10	0.0499576	1867.08	623.369	1867.03	623.352	3	10	1.1.1.3452.2	73.5758	51.36	36.05	73.13	1.62	1118.13
2	29.03	29.03	74.24	74.24	74.24	tr|T2RG98|T2RG98_CLOSO	Uncharacterized protein OS=Paeniclostridium sordellii ATCC 9714 GN=H477_4099 PE=4 SV=1			0	58.09	IFDELLISEKLYLTK	Carbamyl(K)@10		missed K-L@10	0.0570977	1867.09	623.371	1867.03	623.352	3	10	1.1.1.3280.2	71.1369	93.18	87.9	70.76	2.78	2052.19
2	29.03	29.03	74.24	74.24	74.24	tr|T2RG98|T2RG98_CLOSO	Uncharacterized protein OS=Paeniclostridium sordellii ATCC 9714 GN=H477_4099 PE=4 SV=1			0	46.98	IFDELLISEKLYLTK	Carbamyl(K)@10		missed K-L@10	0.0570977	1867.09	623.371	1867.03	623.352	3	10	1.1.1.3308.2	71.8341	93.18	62.71	70.76	2.78	1786.13
2	29.03	29.03	74.24	74.24	74.24	tr|T2RG98|T2RG98_CLOSO	Uncharacterized protein OS=Paeniclostridium sordellii ATCC 9714 GN=H477_4099 PE=4 SV=1			0	36.52	IFDELLISEKLYLTK	Carbamyl(K)@10		missed K-L@10	0.0570977	1867.09	623.371	1867.03	623.352	3	11	1.1.1.3277.2	70.7963	93.18	93.09	70.76	2.78	2688.13
2	29.03	29.03	74.24	74.24	74.24	tr|T2RG98|T2RG98_CLOSO	Uncharacterized protein OS=Paeniclostridium sordellii ATCC 9714 GN=H477_4099 PE=4 SV=1			0	30.37	IFDELLISEKLYLTK	Carbamyl(K)@10		missed K-L@10	0.0499576	1867.08	623.369	1867.03	623.352	3	10	1.1.1.3371.2	72.5987	51.36	43.58	73.13	1.62	1234.13
2	29.03	29.03	74.24	74.24	74.24	tr|T2RG98|T2RG98_CLOSO	Uncharacterized protein OS=Paeniclostridium sordellii ATCC 9714 GN=H477_4099 PE=4 SV=1			0	99	IFDELLISEKLYLTKSDALVVYSAPAEFK	Carbamyl(K)@10; Carbamyl(K)@15		missed K-L@10; missed K-S@15	0.0434614	3387.83	1130.28	3387.79	1130.27	3	21	1.1.1.3208.2	63.3086	707.77	631.11	63.39	0.68	19904.2
2	29.03	29.03	74.24	74.24	74.24	tr|T2RG98|T2RG98_CLOSO	Uncharacterized protein OS=Paeniclostridium sordellii ATCC 9714 GN=H477_4099 PE=4 SV=1			0	99	IFDELLISEKLYLTKSDALVVYSAPAEFK	Carbamyl(K)@10; Carbamyl(K)@15		missed K-L@10; missed K-S@15	0.0434614	3387.83	1130.28	3387.79	1130.27	3	22	1.1.1.3211.2	63.6494	707.77	494.64	63.39	0.68	13258.2
2	29.03	29.03	74.24	74.24	74.24	tr|T2RG98|T2RG98_CLOSO	Uncharacterized protein OS=Paeniclostridium sordellii ATCC 9714 GN=H477_4099 PE=4 SV=1			0	99	IFDFKCVNQQIPR	Acetyldeoxyhypusine(K)@5; Carbamidomethyl(C)@6	Acetyldeoxyhypusine(K)@9	missed K-C@5	-0.144774	1760.79	587.939	1760.94	587.987	3	11	1.1.1.2977.4	39.1799	180.27	176.88	39.19	0.34	17169.2
2	29.03	29.03	74.24	74.24	74.24	tr|T2RG98|T2RG98_CLOSO	Uncharacterized protein OS=Paeniclostridium sordellii ATCC 9714 GN=H477_4099 PE=4 SV=1			0	99	IFDFKCVNQQIPR	Carbamyl(K)@5; Carbamidomethyl(C)@6		missed K-C@5	-0.00767533	1706.85	854.432	1706.86	854.435	2	16	1.1.1.2979.2	39.3382	3431.56	2530.29	39.19	0.34	100165
2	29.03	29.03	74.24	74.24	74.24	tr|T2RG98|T2RG98_CLOSO	Uncharacterized protein OS=Paeniclostridium sordellii ATCC 9714 GN=H477_4099 PE=4 SV=1			0	99	IFDFKCVNQQIPR	Oxidation(F)@4; Carbamyl(K)@5; Carbamidomethyl(C)@6	Oxidation(F)@8	missed K-C@5	0.021902	1722.87	862.444	1722.85	862.433	2	13	1.1.1.2978.3	39.259	228.79	206.1	39.19	0.45	10617.1
2	29.03	29.03	74.24	74.24	74.24	tr|T2RG98|T2RG98_CLOSO	Uncharacterized protein OS=Paeniclostridium sordellii ATCC 9714 GN=H477_4099 PE=4 SV=1			0	98.98	IFDFKCVNQQIPR	Trimethyl(K)@5; Carbamidomethyl(C)@6; Deamidated(N)@8	Trimethyl(K)@9	missed K-C@5	-0.0389977	1706.84	569.955	1706.88	569.968	3	11	1.1.1.2975.3	38.9182	2002.63	471	39.19	0.34	9324.12
2	29.03	29.03	74.24	74.24	74.24	tr|T2RG98|T2RG98_CLOSO	Uncharacterized protein OS=Paeniclostridium sordellii ATCC 9714 GN=H477_4099 PE=4 SV=1			0	65.26	IFDFKCVNQQIPR	Oxidation(D)@3; Carbamyl(K)@5; Carbamidomethyl(C)@6	Oxidation(D)@7	missed K-C@5	0.021902	1722.87	862.444	1722.85	862.433	2	14	1.1.1.2978.3	39.259	228.79	206.1	39.19	0.45	10617.1
2	29.03	29.03	74.24	74.24	74.24	tr|T2RG98|T2RG98_CLOSO	Uncharacterized protein OS=Paeniclostridium sordellii ATCC 9714 GN=H477_4099 PE=4 SV=1			0	54.38	IFDFKCVNQQIPR	Hydroxytrimethyl(K)@5; Carbamidomethyl(C)@6	Hydroxytrimethyl(K)@9	missed K-C@5	-0.0270596	1722.87	862.444	1722.9	862.457	2	12	1.1.1.2978.3	39.259	228.79	206.1	39.19	0.45	10617.1
2	29.03	29.03	74.24	74.24	74.24	tr|T2RG98|T2RG98_CLOSO	Uncharacterized protein OS=Paeniclostridium sordellii ATCC 9714 GN=H477_4099 PE=4 SV=1			0	99	LYLTKSDALVVYSAPAEFK	Carbamyl(K)@5		missed K-S@5	0.0182965	2157.15	1079.58	2157.14	1079.58	2	15	1.1.1.3029.2	45.0163	652.1	317.75	44.77	0.34	11602.1
2	29.03	29.03	74.24	74.24	74.24	tr|T2RG98|T2RG98_CLOSO	Uncharacterized protein OS=Paeniclostridium sordellii ATCC 9714 GN=H477_4099 PE=4 SV=1			0	99	PMGCPPYTAGAPVCIEK	Oxidation(M)@2; Carbamidomethyl(C)@4; Carbamidomethyl(C)@14		cleaved R-P@N-term	0.0379368	1862.87	932.444	1862.84	932.426	2	18	1.1.1.2903.4	30.7736	190.84	186.75	30.68	0.34	6711.13
2	29.03	29.03	74.24	74.24	74.24	tr|T2RG98|T2RG98_CLOSO	Uncharacterized protein OS=Paeniclostridium sordellii ATCC 9714 GN=H477_4099 PE=4 SV=1			0	99	PMGCPPYTAGAPVCIEK	Oxidation(M)@2; Carbamidomethyl(C)@4; Carbamidomethyl(C)@14		cleaved R-P@N-term	0.0220699	1862.86	932.437	1862.84	932.426	2	16	1.1.1.2920.4	32.7045	297.97	271.12	32.6	0.34	8682.07
2	29.03	29.03	74.24	74.24	74.24	tr|T2RG98|T2RG98_CLOSO	Uncharacterized protein OS=Paeniclostridium sordellii ATCC 9714 GN=H477_4099 PE=4 SV=1			0	99	PMGCPPYTAGAPVCIEK	Carbamidomethyl(C)@4; Carbamidomethyl(C)@14		cleaved R-P@N-term	-0.0250995	1846.82	924.415	1846.84	924.428	2	24	1.1.1.2921.2	32.7491	2601.01	1983.9	32.6	0.34	45805.1
2	29.03	29.03	74.24	74.24	74.24	tr|T2RG98|T2RG98_CLOSO	Uncharacterized protein OS=Paeniclostridium sordellii ATCC 9714 GN=H477_4099 PE=4 SV=1			0	99	SDALVVYSAPAEFK				0.018077	1495.77	748.894	1495.76	748.885	2	16	1.1.1.2955.3	36.646	1903.55	1177.02	36.81	0.34	28498.1
2	29.03	29.03	74.24	74.24	74.24	tr|T2RG98|T2RG98_CLOSO	Uncharacterized protein OS=Paeniclostridium sordellii ATCC 9714 GN=H477_4099 PE=4 SV=1			0	99	SIAPQVFTVDPR			cleaved R-P@C-term	-0.0371837	1328.67	665.343	1328.71	665.362	2	17	1.1.1.2943.2	35.2482	4909.18	4898.49	35.32	0.45	208947
2	29.03	29.03	74.24	74.24	74.24	tr|T2RG98|T2RG98_CLOSO	Uncharacterized protein OS=Paeniclostridium sordellii ATCC 9714 GN=H477_4099 PE=4 SV=1			0	99	SIAPQVFTVDPR			cleaved R-P@C-term	-0.0371837	1328.67	665.343	1328.71	665.362	2	14	1.1.1.2947.2	35.7027	4909.18	1854.65	35.32	0.45	36020
2	29.03	29.03	74.24	74.24	74.24	tr|T2RG98|T2RG98_CLOSO	Uncharacterized protein OS=Paeniclostridium sordellii ATCC 9714 GN=H477_4099 PE=4 SV=1			0	99	SIAPQVFTVDPR			cleaved R-P@C-term	-0.0371837	1328.67	665.343	1328.71	665.362	2	10	1.1.1.2953.4	36.4532	4909.18	161.51	35.32	0.45	8304.13
2	29.03	29.03	74.24	74.24	74.24	tr|T2RG98|T2RG98_CLOSO	Uncharacterized protein OS=Paeniclostridium sordellii ATCC 9714 GN=H477_4099 PE=4 SV=1			0	98.56	SIAPQVFTVDPR			cleaved R-P@C-term	-0.0371837	1328.67	665.343	1328.71	665.362	2	11	1.1.1.2950.2	36.0434	4909.18	413.99	35.32	0.45	11189.5
2	29.03	29.03	74.24	74.24	74.24	tr|T2RG98|T2RG98_CLOSO	Uncharacterized protein OS=Paeniclostridium sordellii ATCC 9714 GN=H477_4099 PE=4 SV=1			0	98.46	SIAPQVFTVDPR			cleaved R-P@C-term	-0.0371837	1328.67	665.343	1328.71	665.362	2	11	1.1.1.2941.2	35.0211	4909.18	2198.35	35.32	0.45	23945.1
2	29.03	29.03	74.24	74.24	74.24	tr|T2RG98|T2RG98_CLOSO	Uncharacterized protein OS=Paeniclostridium sordellii ATCC 9714 GN=H477_4099 PE=4 SV=1			0	95.25	SIAPQVFTVDPR			cleaved R-P@C-term	0.0275043	1328.74	665.375	1328.71	665.362	2	9	1.1.1.3151.3	57.2151	59.24	49.78	57.43	2.02	2136.72
2	29.03	29.03	74.24	74.24	74.24	tr|T2RG98|T2RG98_CLOSO	Uncharacterized protein OS=Paeniclostridium sordellii ATCC 9714 GN=H477_4099 PE=4 SV=1			0	86.55	SIAPQVFTVDPR			cleaved R-P@C-term	0.029213	1328.74	665.376	1328.71	665.362	2	9	1.1.1.3105.4	53.7155	56.26	50.83	53.5	1.14	2103.19
2	29.03	29.03	74.24	74.24	74.24	tr|T2RG98|T2RG98_CLOSO	Uncharacterized protein OS=Paeniclostridium sordellii ATCC 9714 GN=H477_4099 PE=4 SV=1			0	85.63	SIAPQVFTVDPR			cleaved R-P@C-term	0.00724351	1328.72	665.365	1328.71	665.362	2	9	1.1.1.3075.4	50.3089	68.63	64.08	50.54	2.73	3271.13
2	29.03	29.03	74.24	74.24	74.24	tr|T2RG98|T2RG98_CLOSO	Uncharacterized protein OS=Paeniclostridium sordellii ATCC 9714 GN=H477_4099 PE=4 SV=1			0	85.63	SIAPQVFTVDPR			cleaved R-P@C-term	0.0275043	1328.74	665.375	1328.71	665.362	2	9	1.1.1.3161.4	58.0404	59.24	47.46	57.43	2.02	1738.13
2	29.03	29.03	74.24	74.24	74.24	tr|T2RG98|T2RG98_CLOSO	Uncharacterized protein OS=Paeniclostridium sordellii ATCC 9714 GN=H477_4099 PE=4 SV=1			0	84.66	SIAPQVFTVDPR			cleaved R-P@C-term	0.0372685	1328.75	665.38	1328.71	665.362	2	9	1.1.1.3312.2	71.9435	41.9	27.19	70.87	2.67	1019.13
2	29.03	29.03	74.24	74.24	74.24	tr|T2RG98|T2RG98_CLOSO	Uncharacterized protein OS=Paeniclostridium sordellii ATCC 9714 GN=H477_4099 PE=4 SV=1			0	73.38	SIAPQVFTVDPR			cleaved R-P@C-term	0.0288469	1328.74	665.376	1328.71	665.362	2	8	1.1.1.3126.2	55.9961	57.16	49.14	55.62	1.83	2005.83
2	29.03	29.03	74.24	74.24	74.24	tr|T2RG98|T2RG98_CLOSO	Uncharacterized protein OS=Paeniclostridium sordellii ATCC 9714 GN=H477_4099 PE=4 SV=1			0	66.97	SIAPQVFTVDPR			cleaved R-P@C-term	0.022256	1328.73	665.373	1328.71	665.362	2	8	1.1.1.3048.3	47.2084	100.8	66.15	47.7	2.84	3908.13
2	29.03	29.03	74.24	74.24	74.24	tr|T2RG98|T2RG98_CLOSO	Uncharacterized protein OS=Paeniclostridium sordellii ATCC 9714 GN=H477_4099 PE=4 SV=1			0	54.38	SIAPQVFTVDPR			cleaved R-P@C-term	-0.0423099	1328.67	665.341	1328.71	665.362	2	8	1.1.1.3026.4	44.7447	214.73	75.69	44.41	0.45	4025.07
2	29.03	29.03	74.24	74.24	74.24	tr|T2RG98|T2RG98_CLOSO	Uncharacterized protein OS=Paeniclostridium sordellii ATCC 9714 GN=H477_4099 PE=4 SV=1			0	54.38	SIAPQVFTVDPR			cleaved R-P@C-term	0.00724351	1328.72	665.365	1328.71	665.362	2	8	1.1.1.3082.3	51.0694	68.63	53.43	50.54	2.73	3376.25
2	29.03	29.03	74.24	74.24	74.24	tr|T2RG98|T2RG98_CLOSO	Uncharacterized protein OS=Paeniclostridium sordellii ATCC 9714 GN=H477_4099 PE=4 SV=1			0	54.38	SIAPQVFTVDPR			cleaved R-P@C-term	0.0372685	1328.75	665.38	1328.71	665.362	2	7	1.1.1.3276.3	70.7173	41.9	40.01	70.87	2.67	1537.06
2	29.03	29.03	74.24	74.24	74.24	tr|T2RG98|T2RG98_CLOSO	Uncharacterized protein OS=Paeniclostridium sordellii ATCC 9714 GN=H477_4099 PE=4 SV=1			0	50.67	SIAPQVFTVDPR			cleaved R-P@C-term	0.0288469	1328.74	665.376	1328.71	665.362	2	7	1.1.1.3123.4	55.7244	57.16	54.72	55.62	1.83	2042.26
2	29.03	29.03	74.24	74.24	74.24	tr|T2RG98|T2RG98_CLOSO	Uncharacterized protein OS=Paeniclostridium sordellii ATCC 9714 GN=H477_4099 PE=4 SV=1			0	41.6	SIAPQVFTVDPR			cleaved R-P@C-term	0.0288469	1328.74	665.376	1328.71	665.362	2	8	1.1.1.3138.3	56.704	57.16	42.3	55.62	1.83	1859.13
2	29.03	29.03	74.24	74.24	74.24	tr|T2RG98|T2RG98_CLOSO	Uncharacterized protein OS=Paeniclostridium sordellii ATCC 9714 GN=H477_4099 PE=4 SV=1			0	39.87	SIAPQVFTVDPR	Dioxidation(P)@4	Dioxidation(P)@21	cleaved R-P@C-term	0.0232035	1360.72	681.368	1360.7	681.357	2	9	1.1.1.2942.4	35.2036	298.6	292.15	35.32	0.45	15046
2	29.03	29.03	74.24	74.24	74.24	tr|T2RG98|T2RG98_CLOSO	Uncharacterized protein OS=Paeniclostridium sordellii ATCC 9714 GN=H477_4099 PE=4 SV=1			0	36.52	SIAPQVFTVDPR			cleaved R-P@C-term	-0.0532947	1328.66	665.335	1328.71	665.362	2	8	1.1.1.3231.3	65.9206	58.58	55.72	65.85	1.21	2249.13
2	29.03	29.03	74.24	74.24	74.24	tr|T2RG98|T2RG98_CLOSO	Uncharacterized protein OS=Paeniclostridium sordellii ATCC 9714 GN=H477_4099 PE=4 SV=1			0	99	SIVPTTPFSGGTFSAR				-0.0176846	1623.81	812.911	1623.83	812.92	2	19	1.1.1.2976.2	38.9973	2847.84	1287.53	38.75	0.34	24189.2
3	24.21	24.21	63.61	63.61	61.31	tr|T0D4X3|T0D4X3_CLOSO	Translation elongation factor Tu OS=Paeniclostridium sordellii ATCC 9714 GN=tuf PE=4 SV=1			2	99	CDMVDDEELLELVEMEVR	Carbamidomethyl(C)@1			0.104609	2223.08	1112.55	2222.97	1112.49	2	16	1.1.1.3128.3	56.2577	99.14	96.36	56.18	1.78	4163.13
3	24.21	24.21	63.61	63.61	61.31	tr|T0D4X3|T0D4X3_CLOSO	Translation elongation factor Tu OS=Paeniclostridium sordellii ATCC 9714 GN=tuf PE=4 SV=1			2	99	DLLNEYEFPGDDTPIVR				0.031262	1991.98	996.997	1991.95	996.981	2	18	1.1.1.3012.2	43.0862	519.11	509.52	43.06	0.34	21921.9
3	24.21	24.21	63.61	63.61	61.31	tr|T0D4X3|T0D4X3_CLOSO	Translation elongation factor Tu OS=Paeniclostridium sordellii ATCC 9714 GN=tuf PE=4 SV=1			2	99	DVDKDFLMPVEDVFSITGR			missed K-D@4	0.0503439	2182.11	728.378	2182.06	728.361	3	19	1.1.1.3106.3	53.7945	1011.38	478.89	54.06	0.34	8229.13
3	24.21	24.21	63.61	63.61	61.31	tr|T0D4X3|T0D4X3_CLOSO	Translation elongation factor Tu OS=Paeniclostridium sordellii ATCC 9714 GN=tuf PE=4 SV=1			2	99	GSALMALQDSSSEWGDK				0.0234795	1780.82	891.416	1780.79	891.404	2	17	1.1.1.2968.3	38.1231	220.23	196.08	38.05	0.23	11260.2
3	24.21	24.21	63.61	63.61	61.31	tr|T0D4X3|T0D4X3_CLOSO	Translation elongation factor Tu OS=Paeniclostridium sordellii ATCC 9714 GN=tuf PE=4 SV=1			2	99	IVELFEQIDEYIPAPER				0.0480152	2060.1	1031.06	2060.05	1031.03	2	21	1.1.1.3084.2	51.2621	410.49	352.61	51.34	0.23	12626.1
3	24.21	24.21	63.61	63.61	61.31	tr|T0D4X3|T0D4X3_CLOSO	Translation elongation factor Tu OS=Paeniclostridium sordellii ATCC 9714 GN=tuf PE=4 SV=1			2	99	KLLDEAQAGDNIGALIR	Carbamyl@N-term		missed K-L@1	0.0338497	1839.02	920.517	1838.98	920.5	2	18	1.1.1.2990.3	40.6223	262.25	250.18	40.56	0.34	11915.1
3	24.21	24.21	63.61	63.61	61.31	tr|T0D4X3|T0D4X3_CLOSO	Translation elongation factor Tu OS=Paeniclostridium sordellii ATCC 9714 GN=tuf PE=4 SV=1			2	99	KLVVTGVEMFR			missed K-L@1	-0.0331874	1277.68	426.902	1277.72	426.913	3	12	1.1.1.2954.3	36.5324	193.5	186.9	36.47	0.23	6352.19
3	24.21	24.21	63.61	63.61	61.31	tr|T0D4X3|T0D4X3_CLOSO	Translation elongation factor Tu OS=Paeniclostridium sordellii ATCC 9714 GN=tuf PE=4 SV=1			2	99	LLDEAQAGDNIGALIR				0.00775719	1667.89	834.953	1667.88	834.949	2	14	1.1.1.2983.4	39.8616	189.39	102.47	39.65	0.34	11120.1
3	24.21	24.21	63.61	63.61	61.31	tr|T0D4X3|T0D4X3_CLOSO	Translation elongation factor Tu OS=Paeniclostridium sordellii ATCC 9714 GN=tuf PE=4 SV=1			2	99	LPEGVEMVMPGDNIQMTIELINSIAIEEGLR				0.144983	3410.86	1137.96	3410.71	1137.91	3	25	1.1.1.3257.2	68.5271	330.83	326.63	68.5	0.34	22865.1
3	24.21	24.21	63.61	63.61	61.31	tr|T0D4X3|T0D4X3_CLOSO	Translation elongation factor Tu OS=Paeniclostridium sordellii ATCC 9714 GN=tuf PE=4 SV=1			2	99	QVGVPYIVVFLNK				0.0338078	1474.89	738.452	1474.85	738.435	2	14	1.1.1.3083.2	51.1485	557.01	498.7	51.01	0.34	14311.1
3	24.21	24.21	63.61	63.61	61.31	tr|T0D4X3|T0D4X3_CLOSO	Translation elongation factor Tu OS=Paeniclostridium sordellii ATCC 9714 GN=tuf PE=4 SV=1			2	99	VQDEVELVGLAEEPR				0.0243378	1681.88	841.946	1681.85	841.933	2	18	1.1.1.2965.4	37.8168	257.25	257.1	37.72	0.68	9181.01
3	24.21	24.21	63.61	63.61	61.31	tr|T0D4X3|T0D4X3_CLOSO	Translation elongation factor Tu OS=Paeniclostridium sordellii ATCC 9714 GN=tuf PE=4 SV=1			1.37675	96.78	TVASGVVASIIE				-0.00744936	1144.63	573.321	1144.63	573.324	2	9	1.1.1.2993.2	40.9285	425.7	368.85	41.01	0.23	11356
3	24.21	24.21	63.61	63.61	61.31	tr|T0D4X3|T0D4X3_CLOSO	Translation elongation factor Tu OS=Paeniclostridium sordellii ATCC 9714 GN=tuf PE=4 SV=1			0.835647	90.08	EHILLSR				-0.0342955	866.463	434.239	866.497	434.256	2	8	1.1.1.2878.2	27.8646	587.41	551.28	27.93	0.23	20601.8
3	24.21	24.21	63.61	63.61	61.31	tr|T0D4X3|T0D4X3_CLOSO	Translation elongation factor Tu OS=Paeniclostridium sordellii ATCC 9714 GN=tuf PE=4 SV=1			0	98.75	CDMVDDEELLELVEMEVR	Carbamidomethyl(C)@1			0.104037	2223.08	742.033	2222.97	741.999	3	10	1.1.1.3134.3	56.491	99.51	83.75	56.32	0.88	2321.07
3	24.21	24.21	63.61	63.61	61.31	tr|T0D4X3|T0D4X3_CLOSO	Translation elongation factor Tu OS=Paeniclostridium sordellii ATCC 9714 GN=tuf PE=4 SV=1			0	34.91	DLLNEYEFPGDDTPIVRGSALMALQDSSSEWGDKIVELFEQIDEYIPAPER	Hex(2)HexNAc(2)dHex(1)(N)@4; Oxidation(M)@22	Hex(2)HexNAc(2)dHex(1)(N)@68	missed R-G@17; missed K-I@34	0.200117	6689.28	956.619	6689.08	956.591	7	12	1.1.1.3260.3	68.9018	204.39	203.21	68.83	0.68	18574.9
3	24.21	24.21	63.61	63.61	61.31	tr|T0D4X3|T0D4X3_CLOSO	Translation elongation factor Tu OS=Paeniclostridium sordellii ATCC 9714 GN=tuf PE=4 SV=1			0	99	DVDKDFLMPVEDVFSITGR			missed K-D@4	0.0503439	2182.11	728.378	2182.06	728.361	3	23	1.1.1.3109.2	54.1006	1011.38	919.8	54.06	0.34	19304.9
3	24.21	24.21	63.61	63.61	61.31	tr|T0D4X3|T0D4X3_CLOSO	Translation elongation factor Tu OS=Paeniclostridium sordellii ATCC 9714 GN=tuf PE=4 SV=1			0	99	DVDKDFLMPVEDVFSITGR			missed K-D@4	0.0503439	2182.11	728.378	2182.06	728.361	3	17	1.1.1.3111.4	54.3967	1011.38	190.1	54.06	0.34	5669.32
3	24.21	24.21	63.61	63.61	61.31	tr|T0D4X3|T0D4X3_CLOSO	Translation elongation factor Tu OS=Paeniclostridium sordellii ATCC 9714 GN=tuf PE=4 SV=1			0	99	DVDKDFLMPVEDVFSITGR	Carbamyl(K)@4		missed K-D@4	0.0927109	2225.16	1113.59	2225.07	1113.54	2	13	1.1.1.3167.2	58.6525	345.07	218.73	58.84	0.45	6526.07
3	24.21	24.21	63.61	63.61	61.31	tr|T0D4X3|T0D4X3_CLOSO	Translation elongation factor Tu OS=Paeniclostridium sordellii ATCC 9714 GN=tuf PE=4 SV=1			0	99	KLVVTGVEMFR	Carbamyl@N-term		missed K-L@1	-0.00392944	1320.72	661.366	1320.72	661.368	2	12	1.1.1.2988.3	40.3952	441.36	412.84	40.44	0.23	22487.4
3	24.21	24.21	63.61	63.61	61.31	tr|T0D4X3|T0D4X3_CLOSO	Translation elongation factor Tu OS=Paeniclostridium sordellii ATCC 9714 GN=tuf PE=4 SV=1			0	99	QVGVPYIVVFLNK	Gln->pyro-Glu@N-term			0.0267656	1457.86	729.935	1457.83	729.921	2	13	1.1.1.3172.3	59.2546	325.19	297.47	59.18	0.45	6357.12
3	24.21	24.21	63.61	63.61	61.31	tr|T0D4X3|T0D4X3_CLOSO	Translation elongation factor Tu OS=Paeniclostridium sordellii ATCC 9714 GN=tuf PE=4 SV=1			0	99	QVGVPYIVVFLNK				0.0338078	1474.89	738.452	1474.85	738.435	2	13	1.1.1.3080.3	50.8423	557.01	322.58	51.01	0.34	8381.13
3	24.21	24.21	63.61	63.61	61.31	tr|T0D4X3|T0D4X3_CLOSO	Translation elongation factor Tu OS=Paeniclostridium sordellii ATCC 9714 GN=tuf PE=4 SV=1			0	99	QVGVPYIVVFLNK	Gln->pyro-Glu@N-term			0.0267656	1457.86	729.935	1457.83	729.921	2	12	1.1.1.3169.4	58.9485	325.19	216.18	59.18	0.45	4872.13
3	24.21	24.21	63.61	63.61	61.31	tr|T0D4X3|T0D4X3_CLOSO	Translation elongation factor Tu OS=Paeniclostridium sordellii ATCC 9714 GN=tuf PE=4 SV=1			0	96.42	QVGVPYIVVFLNK	Gln->pyro-Glu@N-term			0.0267656	1457.86	729.935	1457.83	729.921	2	9	1.1.1.3175.4	59.6296	325.19	62	59.18	0.45	1852.13
4	14.9	14.9	42.91	42.91	40.16	tr|T0CP16|T0CP16_CLOSO	Peroxiredoxin OS=Paeniclostridium sordellii ATCC 9714 GN=H477_2044 PE=3 SV=1			2	99	IIDALQTSDEQK				-0.030348	1359.66	680.836	1359.69	680.851	2	16	1.1.1.2888.3	29.0351	389.97	376.7	29.07	0.23	15229.1
4	14.9	14.9	42.91	42.91	40.16	tr|T0CP16|T0CP16_CLOSO	Peroxiredoxin OS=Paeniclostridium sordellii ATCC 9714 GN=H477_2044 PE=3 SV=1			2	99	KMEISQLYGMISEPMSDSSTVR			missed K-M@1	0.0563016	2488.22	830.414	2488.16	830.396	3	23	1.1.1.3024.2	44.4486	310.85	296.23	44.42	0.34	12750.1
4	14.9	14.9	42.91	42.91	40.16	tr|T0CP16|T0CP16_CLOSO	Peroxiredoxin OS=Paeniclostridium sordellii ATCC 9714 GN=H477_2044 PE=3 SV=1			2	99	NTGVEIPFPIIDDR				0.0118857	1584.83	793.421	1584.81	793.415	2	19	1.1.1.3039.2	46.1521	1065.86	617.14	45.99	0.34	12525.4
4	14.9	14.9	42.91	42.91	40.16	tr|T0CP16|T0CP16_CLOSO	Peroxiredoxin OS=Paeniclostridium sordellii ATCC 9714 GN=H477_2044 PE=3 SV=1			2	99	SVFIIDPNQILR				0.00907375	1413.81	707.911	1413.8	707.906	2	13	1.1.1.3047.2	47.0603	1386.48	920.61	46.91	0.34	23173
4	14.9	14.9	42.91	42.91	40.16	tr|T0CP16|T0CP16_CLOSO	Peroxiredoxin OS=Paeniclostridium sordellii ATCC 9714 GN=H477_2044 PE=3 SV=1			2	99	TILYYPLTTGR				0.0115604	1296.72	649.367	1296.71	649.361	2	14	1.1.1.2966.2	37.8614	1000.65	893.07	37.94	0.23	25135.6
4	14.9	14.9	42.91	42.91	40.16	tr|T0CP16|T0CP16_CLOSO	Peroxiredoxin OS=Paeniclostridium sordellii ATCC 9714 GN=H477_2044 PE=3 SV=1			2	99	VVTPADWLPGMPVILPPPK				0.0745492	2026.21	1014.11	2026.13	1014.07	2	17	1.1.1.3090.4	52.0123	290.78	260.38	52.13	0.45	10133.1
4	14.9	14.9	42.91	42.91	40.16	tr|T0CP16|T0CP16_CLOSO	Peroxiredoxin OS=Paeniclostridium sordellii ATCC 9714 GN=H477_2044 PE=3 SV=1			1.72125	98.87	PCLPSLGTK	Carbamidomethyl(C)@2		cleaved M-P@N-term	-0.00538422	971.506	486.76	971.511	486.763	2	10	1.1.1.2903.3	30.7391	163.9	147.92	30.67	0.57	8150.07
4	14.9	14.9	42.91	42.91	40.16	tr|T0CP16|T0CP16_CLOSO	Peroxiredoxin OS=Paeniclostridium sordellii ATCC 9714 GN=H477_2044 PE=3 SV=1			0.730487	99	VVTPADWLPGMPVILPPPKTYK	Carbamyl(K)@19		missed K-T@19	0.0857811	2461.43	821.484	2461.34	821.455	3	17	1.1.1.3097.3	52.7727	168.22	163.79	52.71	0.34	7540.06
4	14.9	14.9	42.91	42.91	40.16	tr|T0CP16|T0CP16_CLOSO	Peroxiredoxin OS=Paeniclostridium sordellii ATCC 9714 GN=H477_2044 PE=3 SV=1			0.454693	74.13	NIPEIVR				-0.021884	839.465	420.74	839.487	420.751	2	7	1.1.1.2901.2	30.4774	831.17	783.24	30.54	0.23	19197.3
4	14.9	14.9	42.91	42.91	40.16	tr|T0CP16|T0CP16_CLOSO	Peroxiredoxin OS=Paeniclostridium sordellii ATCC 9714 GN=H477_2044 PE=3 SV=1			0	99	NTGVEIPFPIIDDR				0.0118857	1584.83	793.421	1584.81	793.415	2	20	1.1.1.3036.3	45.8459	1065.86	910.1	45.99	0.34	19152.8
4	14.9	14.9	42.91	42.91	40.16	tr|T0CP16|T0CP16_CLOSO	Peroxiredoxin OS=Paeniclostridium sordellii ATCC 9714 GN=H477_2044 PE=3 SV=1			0	99	NTGVEIPFPIIDDR	Deamidated(N)@1			0.0673964	1585.87	793.94	1585.8	793.907	2	12	1.1.1.3051.4	47.5835	105.18	101.35	47.37	1.36	6015.13
4	14.9	14.9	42.91	42.91	40.16	tr|T0CP16|T0CP16_CLOSO	Peroxiredoxin OS=Paeniclostridium sordellii ATCC 9714 GN=H477_2044 PE=3 SV=1			0	99	SVFIIDPNQILR				0.00907375	1413.81	707.911	1413.8	707.906	2	13	1.1.1.3044.2	46.7199	1386.48	852.05	46.91	0.34	18207.1
4	14.9	14.9	42.91	42.91	40.16	tr|T0CP16|T0CP16_CLOSO	Peroxiredoxin OS=Paeniclostridium sordellii ATCC 9714 GN=H477_2044 PE=3 SV=1			0	38.17	TILYYPLTTGR				0.0115604	1296.72	649.367	1296.71	649.361	2	8	1.1.1.2969.3	38.2366	1000.65	216.2	37.94	0.23	19403
4	14.9	14.9	42.91	42.91	40.16	tr|T0CP16|T0CP16_CLOSO	Peroxiredoxin OS=Paeniclostridium sordellii ATCC 9714 GN=H477_2044 PE=3 SV=1			0	99	VVTPADWLPGMPVILPPPK				0.0745492	2026.21	1014.11	2026.13	1014.07	2	14	1.1.1.3093.4	52.3529	290.78	160.95	52.13	0.45	7044.13
5	14.48	14.53	32.08	29.69	29.69	tr|T0E6S9|T0E6S9_CLOSO	Glycosyl hydrolases 18 family protein OS=Paeniclostridium sordellii ATCC 9714 GN=H477_2042 PE=3 SV=1			2	99	ENFTLLLTAIR				0.00920852	1289.74	645.879	1289.73	645.874	2	13	1.1.1.3067.2	49.3316	950.4	703.88	49.42	0.34	19313.1
5	14.48	14.53	32.08	29.69	29.69	tr|T0E6S9|T0E6S9_CLOSO	Glycosyl hydrolases 18 family protein OS=Paeniclostridium sordellii ATCC 9714 GN=H477_2042 PE=3 SV=1			2	99	ILLGIPFYGR				0.0145354	1147.69	574.852	1147.68	574.845	2	13	1.1.1.3044.4	46.7888	364.28	354.91	46.81	0.34	8890.07
5	14.48	14.53	32.08	29.69	29.69	tr|T0E6S9|T0E6S9_CLOSO	Glycosyl hydrolases 18 family protein OS=Paeniclostridium sordellii ATCC 9714 GN=H477_2042 PE=3 SV=1			2	99	NLIAAGMPSQK				-0.0277054	1128.57	565.292	1128.6	565.305	2	12	1.1.1.2897.4	30.092	228.51	226.27	30.1	0.23	11802.1
5	14.48	14.53	32.08	29.69	29.69	tr|T0E6S9|T0E6S9_CLOSO	Glycosyl hydrolases 18 family protein OS=Paeniclostridium sordellii ATCC 9714 GN=H477_2042 PE=3 SV=1			2	99	NLIAAGMPSQKILLGIPFYGR	Carbamyl(K)@11		missed K-I@11	0.0788668	2301.35	768.122	2301.27	768.096	3	19	1.1.1.3104.2	53.533	315.55	285.04	53.61	0.34	9696.11
5	14.48	14.53	32.08	29.69	29.69	tr|T0E6S9|T0E6S9_CLOSO	Glycosyl hydrolases 18 family protein OS=Paeniclostridium sordellii ATCC 9714 GN=H477_2042 PE=3 SV=1			2	99	QEIEDTYGPGFLK				0.0195553	1495.74	748.877	1495.72	748.867	2	14	1.1.1.2950.3	36.0779	212.71	211.74	36.11	0.45	7658.13
5	14.48	14.53	32.08	29.69	29.69	tr|T0E6S9|T0E6S9_CLOSO	Glycosyl hydrolases 18 family protein OS=Paeniclostridium sordellii ATCC 9714 GN=H477_2042 PE=3 SV=1			2	99	VIVAIGGWGQDGFSDAALTPSSR				0.0891206	2303.24	1152.63	2303.15	1152.58	2	16	1.1.1.3023.4	44.404	197.05	180.24	44.3	0.45	7149.13
5	14.48	14.53	32.08	29.69	29.69	tr|T0E6S9|T0E6S9_CLOSO	Glycosyl hydrolases 18 family protein OS=Paeniclostridium sordellii ATCC 9714 GN=H477_2042 PE=3 SV=1			1.95861	99	SRPEDRENFTLLLTAIR			missed R-E@6	0.00937892	2030.1	677.707	2030.09	677.704	3	13	1.1.1.3021.4	44.1769	143.2	117.06	44.07	0.45	6473.13
5	14.48	14.53	32.08	29.69	29.69	tr|T0E6S9|T0E6S9_CLOSO	Glycosyl hydrolases 18 family protein OS=Paeniclostridium sordellii ATCC 9714 GN=H477_2042 PE=3 SV=1			0.521434	99	LGATITKSYDQLR	Carbamyl(K)@7		missed K-S@7	-0.0068365	1507.79	754.904	1507.8	754.907	2	14	1.1.1.2919.2	32.522	397.99	382.14	32.49	0.23	14699.4
5	14.48	14.53	32.08	29.69	29.69	tr|T0E6S9|T0E6S9_CLOSO	Glycosyl hydrolases 18 family protein OS=Paeniclostridium sordellii ATCC 9714 GN=H477_2042 PE=3 SV=1			0	99	ENFTLLLTAIR				0.00920852	1289.74	645.879	1289.73	645.874	2	12	1.1.1.3070.2	49.6722	950.4	453.2	49.42	0.34	11354.1
5	14.48	14.53	32.08	29.69	29.69	tr|T0E6S9|T0E6S9_CLOSO	Glycosyl hydrolases 18 family protein OS=Paeniclostridium sordellii ATCC 9714 GN=H477_2042 PE=3 SV=1			0	98.23	ENFTLLLTAIR	Deamidated(N)@2			0.015651	1290.73	646.374	1290.72	646.366	2	8	1.1.1.3117.2	55.0088	58.96	55.44	55.08	0.65	2349.25
5	14.48	14.53	32.08	29.69	29.69	tr|T0E6S9|T0E6S9_CLOSO	Glycosyl hydrolases 18 family protein OS=Paeniclostridium sordellii ATCC 9714 GN=H477_2042 PE=3 SV=1			0	99	ILLGIPFYGR				0.0145354	1147.69	574.852	1147.68	574.845	2	12	1.1.1.3047.3	47.0948	364.28	156.32	46.81	0.34	4416.25
5	14.48	14.53	32.08	29.69	29.69	tr|T0E6S9|T0E6S9_CLOSO	Glycosyl hydrolases 18 family protein OS=Paeniclostridium sordellii ATCC 9714 GN=H477_2042 PE=3 SV=1			0	99	NLIAAGMPSQKILLGIPFYGR	Deamidated(Q)@10; Formyl(K)@11		missed K-I@11	0.115542	2287.36	763.459	2287.24	763.421	3	14	1.1.1.3085.4	51.4446	136.31	115.66	51.34	0.34	6700.83
5	14.48	14.53	32.08	29.69	29.69	tr|T0E6S9|T0E6S9_CLOSO	Glycosyl hydrolases 18 family protein OS=Paeniclostridium sordellii ATCC 9714 GN=H477_2042 PE=3 SV=1			0	39.87	NLIAAGMPSQKILLGIPFYGR	Carbamyl(M)@7		missed K-I@11	0.0788668	2301.35	768.122	2301.27	768.096	3	19	1.1.1.3104.2	53.533	315.55	285.04	53.61	0.34	9696.11
5	14.48	14.53	32.08	29.69	29.69	tr|T0E6S9|T0E6S9_CLOSO	Glycosyl hydrolases 18 family protein OS=Paeniclostridium sordellii ATCC 9714 GN=H477_2042 PE=3 SV=1			0	26.31	NLIAAGMPSQKILLGIPFYGR	Deamidated(Q)@10; Delta:H(4)C(2)(K)@11		missed K-I@11	0.0791561	2287.36	763.459	2287.28	763.433	3	14	1.1.1.3085.4	51.4446	136.31	115.66	51.34	0.34	6700.83
5	14.48	14.53	32.08	29.69	29.69	tr|T0E6S9|T0E6S9_CLOSO	Glycosyl hydrolases 18 family protein OS=Paeniclostridium sordellii ATCC 9714 GN=H477_2042 PE=3 SV=1			0	94.9	SRPEDRENFTLLLTAIR	Pro->pyro-Glu(P)@3; Deamidated(R)@6	Deamidated(R)@78	missed R-E@6	0.0922846	2045.15	682.723	2045.05	682.692	3	13	1.1.1.3056.4	48.1514	130.91	130.89	48.06	0.34	8764.26
6	14.24	14.26	43.18	43.18	34.47	tr|T0E6L8|T0E6L8_CLOSO	Peptidase M20/M25/M40 family protein OS=Paeniclostridium sordellii ATCC 9714 GN=H477_0435 PE=4 SV=1			2	99	AIQTMSMDIENLVESSTNLGVLR			cleaved N-A@N-term	0.0357124	2520.29	841.105	2520.26	841.093	3	16	1.1.1.3166.4	58.6079	98.37	95.32	58.51	0.45	3950.32
6	14.24	14.26	43.18	43.18	34.47	tr|T0E6L8|T0E6L8_CLOSO	Peptidase M20/M25/M40 family protein OS=Paeniclostridium sordellii ATCC 9714 GN=H477_0435 PE=4 SV=1			2	99	LDLISDYPAWEYAK				0.0146921	1682.83	842.424	1682.82	842.417	2	12	1.1.1.3016.2	43.5403	184.95	182.41	43.61	0.34	6509.06
6	14.24	14.26	43.18	43.18	34.47	tr|T0E6L8|T0E6L8_CLOSO	Peptidase M20/M25/M40 family protein OS=Paeniclostridium sordellii ATCC 9714 GN=H477_0435 PE=4 SV=1			2	99	LLNLLDVDFDLAK				0.0306158	1487.85	744.934	1487.82	744.919	2	15	1.1.1.3103.2	53.4195	674.48	430.25	53.26	0.34	8557.13
6	14.24	14.26	43.18	43.18	34.47	tr|T0E6L8|T0E6L8_CLOSO	Peptidase M20/M25/M40 family protein OS=Paeniclostridium sordellii ATCC 9714 GN=H477_0435 PE=4 SV=1			2	99	MELLISEFGGK				-0.0172008	1222.61	612.312	1222.63	612.321	2	12	1.1.1.3012.3	43.1206	321.68	301.33	43.16	0.23	15774
6	14.24	14.26	43.18	43.18	34.47	tr|T0E6L8|T0E6L8_CLOSO	Peptidase M20/M25/M40 family protein OS=Paeniclostridium sordellii ATCC 9714 GN=H477_0435 PE=4 SV=1			2	99	SMDIENLVESSTNLGVLR			cleaved M-S@N-term	0.0548981	1976.04	989.029	1975.99	989.002	2	15	1.1.1.3071.4	49.8548	118.46	93.03	49.74	0.45	5422.13
6	14.24	14.26	43.18	43.18	34.47	tr|T0E6L8|T0E6L8_CLOSO	Peptidase M20/M25/M40 family protein OS=Paeniclostridium sordellii ATCC 9714 GN=H477_0435 PE=4 SV=1			2	99	TTDSTVTFECAVR	Carbamidomethyl(C)@10			-0.0077891	1485.67	743.842	1485.68	743.846	2	17	1.1.1.2905.4	31.0008	415.71	406.3	31.02	0.34	10634.1
6	14.24	14.26	43.18	43.18	34.47	tr|T0E6L8|T0E6L8_CLOSO	Peptidase M20/M25/M40 family protein OS=Paeniclostridium sordellii ATCC 9714 GN=H477_0435 PE=4 SV=1			2	99	VLNLIPNAIQTMSMDIENLVESSTNLGVLR	Deamidated(N)@18			0.0677436	3284.77	1095.93	3284.7	1095.91	3	18	1.1.1.3269.4	69.9573	245.4	183.91	69.84	0.34	5792.13
6	14.24	14.26	43.18	43.18	34.47	tr|T0E6L8|T0E6L8_CLOSO	Peptidase M20/M25/M40 family protein OS=Paeniclostridium sordellii ATCC 9714 GN=H477_0435 PE=4 SV=1			0.182435	99	YLLEILKSMK	Carbamyl(K)@7		missed K-S@7	0.0246005	1279.75	640.88	1279.72	640.868	2	14	1.1.1.3076.4	50.4225	183.33	181.38	50.43	0.34	6075.06
6	14.24	14.26	43.18	43.18	34.47	tr|T0E6L8|T0E6L8_CLOSO	Peptidase M20/M25/M40 family protein OS=Paeniclostridium sordellii ATCC 9714 GN=H477_0435 PE=4 SV=1			0.0550241	20.09	YLLEILK				-0.0327977	890.515	446.265	890.548	446.281	2	9	1.1.1.3004.4	42.2465	100.35	55.39	42.03	0.34	3893.13
6	14.24	14.26	43.18	43.18	34.47	tr|T0E6L8|T0E6L8_CLOSO	Peptidase M20/M25/M40 family protein OS=Paeniclostridium sordellii ATCC 9714 GN=H477_0435 PE=4 SV=1			0.00392635	80.22	LLNLLDVDFDLAKVEGGSK	Carbamyl@N-term		missed K-V@13	0.0893756	2088.2	1045.11	2088.11	1045.06	2	11	1.1.1.3124.2	55.769	161.93	155.56	55.84	0.57	5243.13
6	14.24	14.26	43.18	43.18	34.47	tr|T0E6L8|T0E6L8_CLOSO	Peptidase M20/M25/M40 family protein OS=Paeniclostridium sordellii ATCC 9714 GN=H477_0435 PE=4 SV=1			0.000434512	73.38	EITEIFKHELR	Carbamyl(K)@7		missed K-H@7	0.000257779	1456.77	486.596	1456.77	486.596	3	10	1.1.1.2964.4	37.703	152.62	116.11	37.59	0.23	4075.13
6	14.24	14.26	43.18	43.18	34.47	tr|T0E6L8|T0E6L8_CLOSO	Peptidase M20/M25/M40 family protein OS=Paeniclostridium sordellii ATCC 9714 GN=H477_0435 PE=4 SV=1			0	30.37	FVACVKEITEIFK	Carbamidomethyl(C)@4; Carboxy(K)@6	Carboxy(K)@62	missed K-E@6	-0.00136522	1626.83	814.423	1626.83	814.424	2	13	1.1.1.3077.4	50.5361	219.08	159.57	50.76	0.57	5644.13
6	14.24	14.26	43.18	43.18	34.47	tr|T0E6L8|T0E6L8_CLOSO	Peptidase M20/M25/M40 family protein OS=Paeniclostridium sordellii ATCC 9714 GN=H477_0435 PE=4 SV=1			0	54.38	FVACVKEITEIFKHELR	Carbamidomethyl(C)@4; Malonyl(K)@6	Malonyl(K)@62	missed K-E@6; missed K-H@13	0.0783984	2204.21	735.743	2204.13	735.717	3	13	1.1.1.3125.3	55.917	209.97	189.16	55.97	0.34	5724.19
6	14.24	14.26	43.18	43.18	34.47	tr|T0E6L8|T0E6L8_CLOSO	Peptidase M20/M25/M40 family protein OS=Paeniclostridium sordellii ATCC 9714 GN=H477_0435 PE=4 SV=1			0	99	LLNLLDVDFDLAK				0.0306158	1487.85	744.934	1487.82	744.919	2	16	1.1.1.3100.3	53.1134	674.48	518.89	53.26	0.34	11930.2
7	12.7	12.7	47.26	47.26	47.26	tr|T0DW21|T0DW21_CLOSO	Uncharacterized protein OS=Paeniclostridium sordellii ATCC 9714 GN=H477_3327 PE=4 SV=1			2	99	INLIEVLNDMLIYSK				-0.0294451	1776.94	889.477	1776.97	889.492	2	18	1.1.1.3258.2	68.6406	264.94	263.65	68.63	0.34	14118.1
7	12.7	12.7	47.26	47.26	47.26	tr|T0DW21|T0DW21_CLOSO	Uncharacterized protein OS=Paeniclostridium sordellii ATCC 9714 GN=H477_3327 PE=4 SV=1			2	99	KINLIEVLNDMLIYSK	Carbamyl@N-term		missed K-I@1	-0.0340353	1948.04	650.353	1948.07	650.364	3	16	1.1.1.3255.2	68.3001	90.36	88.32	68.27	0.23	4438.13
7	12.7	12.7	47.26	47.26	47.26	tr|T0DW21|T0DW21_CLOSO	Uncharacterized protein OS=Paeniclostridium sordellii ATCC 9714 GN=H477_3327 PE=4 SV=1			2	99	NVLLQYLYR				-0.00720097	1180.65	591.334	1180.66	591.338	2	11	1.1.1.3015.2	43.4268	1122.11	546.93	43.62	0.23	9302.27
7	12.7	12.7	47.26	47.26	47.26	tr|T0DW21|T0DW21_CLOSO	Uncharacterized protein OS=Paeniclostridium sordellii ATCC 9714 GN=H477_3327 PE=4 SV=1			2	99	VAPNIDLSLDWMPNK				0.0351436	1711.9	856.955	1711.86	856.937	2	14	1.1.1.3031.3	45.278	250.05	248.68	45.31	0.34	14605.1
7	12.7	12.7	47.26	47.26	47.26	tr|T0DW21|T0DW21_CLOSO	Uncharacterized protein OS=Paeniclostridium sordellii ATCC 9714 GN=H477_3327 PE=4 SV=1			2	99	VAPNIDLSLDWMPNKIDNSAEIWR	Oxidation(M)@12; Deamidated(N)@14; Delta:H(2)C(2)(K)@15		missed K-I@15	0.070295	2839.46	947.492	2839.39	947.469	3	20	1.1.1.3101.4	53.2614	280.03	268.83	53.37	0.34	10343.1
7	12.7	12.7	47.26	47.26	47.26	tr|T0DW21|T0DW21_CLOSO	Uncharacterized protein OS=Paeniclostridium sordellii ATCC 9714 GN=H477_3327 PE=4 SV=1			1.5376	99	DLYDFIELLK				0.0248369	1267.69	634.855	1267.67	634.842	2	10	1.1.1.3172.2	59.2202	786.46	532.59	59.07	0.34	10364.6
7	12.7	12.7	47.26	47.26	47.26	tr|T0DW21|T0DW21_CLOSO	Uncharacterized protein OS=Paeniclostridium sordellii ATCC 9714 GN=H477_3327 PE=4 SV=1			1.10237	95.73	IDNSAEIWR				-0.00181751	1102.54	552.277	1102.54	552.278	2	12	1.1.1.2913.2	31.8406	285.62	273.14	31.81	0.34	9804.95
7	12.7	12.7	47.26	47.26	47.26	tr|T0DW21|T0DW21_CLOSO	Uncharacterized protein OS=Paeniclostridium sordellii ATCC 9714 GN=H477_3327 PE=4 SV=1			0.0457575	99	DLYDFIELLKFEK	Carbamyl(K)@10		missed K-F@10	-0.0245594	1714.86	858.436	1714.88	858.448	2	15	1.1.1.3193.2	61.6045	319.28	277.13	61.68	0.34	7186.13
7	12.7	12.7	47.26	47.26	47.26	tr|T0DW21|T0DW21_CLOSO	Uncharacterized protein OS=Paeniclostridium sordellii ATCC 9714 GN=H477_3327 PE=4 SV=1			0.0101054	98.56	INLIEVLNDMLIYSKEKPYISK	Carbamyl(K)@15		missed K-E@15	-0.0141613	2665.43	889.483	2665.44	889.487	3	13	1.1.1.3241.3	66.8145	131.98	127.88	66.75	0.45	4372.07
7	12.7	12.7	47.26	47.26	47.26	tr|T0DW21|T0DW21_CLOSO	Uncharacterized protein OS=Paeniclostridium sordellii ATCC 9714 GN=H477_3327 PE=4 SV=1			0	97.3	DLYDFIELLK				0.0248369	1267.69	634.855	1267.67	634.842	2	10	1.1.1.3169.2	58.8796	786.46	496.35	59.07	0.34	7136.7
7	12.7	12.7	47.26	47.26	47.26	tr|T0DW21|T0DW21_CLOSO	Uncharacterized protein OS=Paeniclostridium sordellii ATCC 9714 GN=H477_3327 PE=4 SV=1			0	99	NVLLQYLYR				-0.00720097	1180.65	591.334	1180.66	591.338	2	12	1.1.1.3018.2	43.7674	1122.11	787.42	43.62	0.23	21712
8	12.52	12.55	63.21	63.21	61.32	tr|T0E0I6|T0E0I6_CLOSO	Uncharacterized protein OS=Paeniclostridium sordellii ATCC 9714 GN=H477_1422 PE=4 SV=1			2	99	EGIKGLEDNLLNLACDLSDIK	Carbamidomethyl(C)@15		missed K-G@4	0.115226	2329.3	777.44	2329.18	777.402	3	19	1.1.1.3174.3	59.4817	184.16	170.12	59.53	0.45	5596.12
8	12.52	12.55	63.21	63.21	61.32	tr|T0E0I6|T0E0I6_CLOSO	Uncharacterized protein OS=Paeniclostridium sordellii ATCC 9714 GN=H477_1422 PE=4 SV=1			2	99	EGIKGLEDNLLNLACDLSDIKK	Carbamyl@N-term; Carbamidomethyl(C)@15		missed K-G@4; missed K-K@21	0.0866869	2500.37	834.464	2500.28	834.435	3	17	1.1.1.3175.2	59.5607	1315.27	522.35	59.76	0.34	6658.25
8	12.52	12.55	63.21	63.21	61.32	tr|T0E0I6|T0E0I6_CLOSO	Uncharacterized protein OS=Paeniclostridium sordellii ATCC 9714 GN=H477_1422 PE=4 SV=1			2	99	GLEDNLLNLACDLSDIK	Carbamidomethyl(C)@11			0.0486991	1901.99	952.002	1901.94	951.977	2	15	1.1.1.3168.2	58.766	2429.41	483.1	58.39	0.45	8655.13
8	12.52	12.55	63.21	63.21	61.32	tr|T0E0I6|T0E0I6_CLOSO	Uncharacterized protein OS=Paeniclostridium sordellii ATCC 9714 GN=H477_1422 PE=4 SV=1			2	99	GLEDNLLNLACDLSDIKK	Carbamidomethyl(C)@11		missed K-K@17	0.040877	2030.08	677.699	2030.04	677.686	3	15	1.1.1.3097.2	52.7382	2380.42	942.15	52.94	0.34	8996.13
8	12.52	12.55	63.21	63.21	61.32	tr|T0E0I6|T0E0I6_CLOSO	Uncharacterized protein OS=Paeniclostridium sordellii ATCC 9714 GN=H477_1422 PE=4 SV=1			2	99	GLEDNLLNLACDLSDIKKALSNAVK	Carbamidomethyl(C)@11; Malonyl(K)@17	Malonyl(K)@94	missed K-K@17; missed K-A@18	0.011166	2799.44	934.155	2799.43	934.151	3	21	1.1.1.3266.2	69.5478	813.88	797.11	69.51	0.23	40218.1
8	12.52	12.55	63.21	63.21	61.32	tr|T0E0I6|T0E0I6_CLOSO	Uncharacterized protein OS=Paeniclostridium sordellii ATCC 9714 GN=H477_1422 PE=4 SV=1			1.24413	98.7	DLIDDAKDTNNMLGK			missed K-D@7	-0.0121663	1661.78	554.934	1661.79	554.938	3	14	1.1.1.2932.2	33.9986	268.49	249.81	33.96	0.23	30311.4
8	12.52	12.55	63.21	63.21	61.32	tr|T0E0I6|T0E0I6_CLOSO	Uncharacterized protein OS=Paeniclostridium sordellii ATCC 9714 GN=H477_1422 PE=4 SV=1			0.987163	95.08	WDNVCYYK	Carbamidomethyl(C)@5			-0.0139839	1146.47	574.24	1146.48	574.247	2	9	1.1.1.2899.2	30.2502	667.13	557.63	30.33	0.23	15199.1
8	12.52	12.55	63.21	63.21	61.32	tr|T0E0I6|T0E0I6_CLOSO	Uncharacterized protein OS=Paeniclostridium sordellii ATCC 9714 GN=H477_1422 PE=4 SV=1			0.283997	99	DLKEALENQNAAK	Carbamyl(K)@3		missed K-E@3	0.00897511	1485.75	743.883	1485.74	743.878	2	15	1.1.1.2920.2	32.6356	458.7	432.11	32.7	0.34	15308.9
8	12.52	12.55	63.21	63.21	61.32	tr|T0E0I6|T0E0I6_CLOSO	Uncharacterized protein OS=Paeniclostridium sordellii ATCC 9714 GN=H477_1422 PE=4 SV=1			0	99	EGIKGLEDNLLNLACDLSDIK	Delta:H(2)C(2)(K)@4; Oxidation(D)@8; Deamidated(N)@9; Carbamidomethyl(C)@15	Oxidation(D)@81	missed K-G@4	-0.0370126	2372.14	1187.08	2372.18	1187.1	2	20	1.1.1.3219.2	64.5579	1006.11	589.54	64.75	0.34	9587.13
8	12.52	12.55	63.21	63.21	61.32	tr|T0E0I6|T0E0I6_CLOSO	Uncharacterized protein OS=Paeniclostridium sordellii ATCC 9714 GN=H477_1422 PE=4 SV=1			0	99	EGIKGLEDNLLNLACDLSDIK	Delta:H(2)C(2)(K)@4; Oxidation(D)@8; Deamidated(N)@9; Carbamidomethyl(C)@15	Oxidation(D)@81	missed K-G@4	-0.0370126	2372.14	1187.08	2372.18	1187.1	2	18	1.1.1.3222.2	64.8985	1006.11	727.89	64.75	0.34	13399.2
8	12.52	12.55	63.21	63.21	61.32	tr|T0E0I6|T0E0I6_CLOSO	Uncharacterized protein OS=Paeniclostridium sordellii ATCC 9714 GN=H477_1422 PE=4 SV=1			0	99	EGIKGLEDNLLNLACDLSDIKK	Carbamyl@N-term; Carbamidomethyl(C)@15		missed K-G@4; missed K-K@21	0.0866869	2500.37	834.464	2500.28	834.435	3	19	1.1.1.3178.2	59.9013	1315.27	1142.25	59.76	0.34	24450
8	12.52	12.55	63.21	63.21	61.32	tr|T0E0I6|T0E0I6_CLOSO	Uncharacterized protein OS=Paeniclostridium sordellii ATCC 9714 GN=H477_1422 PE=4 SV=1			0	99	EGIKGLEDNLLNLACDLSDIKK	Carbamidomethyl(C)@15		missed K-G@4; missed K-K@21	0.213999	2457.49	615.38	2457.28	615.327	4	15	1.1.1.3113.2	54.5548	142.14	136.33	54.62	0.34	5425.13
8	12.52	12.55	63.21	63.21	61.32	tr|T0E0I6|T0E0I6_CLOSO	Uncharacterized protein OS=Paeniclostridium sordellii ATCC 9714 GN=H477_1422 PE=4 SV=1			0	99	EGIKGLEDNLLNLACDLSDIKK	Carbamyl@N-term; Carbamidomethyl(C)@15; Carbamyl(K)@21		missed K-G@4; missed K-K@21	-0.0929141	2543.2	848.74	2543.29	848.771	3	20	1.1.1.3207.2	63.195	933.02	780	63.28	0.34	19770.1
8	12.52	12.55	63.21	63.21	61.32	tr|T0E0I6|T0E0I6_CLOSO	Uncharacterized protein OS=Paeniclostridium sordellii ATCC 9714 GN=H477_1422 PE=4 SV=1			0	99	EGIKGLEDNLLNLACDLSDIKK	Carbamidomethyl(C)@15; Carbamyl(K)@21		missed K-G@4; missed K-K@21	0.0656328	2500.35	834.457	2500.28	834.435	3	15	1.1.1.3165.4	58.4944	144.52	142.31	58.51	0.45	4413.13
8	12.52	12.55	63.21	63.21	61.32	tr|T0E0I6|T0E0I6_CLOSO	Uncharacterized protein OS=Paeniclostridium sordellii ATCC 9714 GN=H477_1422 PE=4 SV=1			0	99	GLEDNLLNLACDLSDIK	Carbamidomethyl(C)@11			0.0486991	1901.99	952.002	1901.94	951.977	2	16	1.1.1.3162.2	58.085	2429.41	780.73	58.39	0.45	7271.12
8	12.52	12.55	63.21	63.21	61.32	tr|T0E0I6|T0E0I6_CLOSO	Uncharacterized protein OS=Paeniclostridium sordellii ATCC 9714 GN=H477_1422 PE=4 SV=1			0	99	GLEDNLLNLACDLSDIK	Carbamidomethyl(C)@11			0.0486991	1901.99	952.002	1901.94	951.977	2	21	1.1.1.3165.2	58.4254	2429.41	2293.65	58.39	0.45	45248.1
8	12.52	12.55	63.21	63.21	61.32	tr|T0E0I6|T0E0I6_CLOSO	Uncharacterized protein OS=Paeniclostridium sordellii ATCC 9714 GN=H477_1422 PE=4 SV=1			0	70.27	GLEDNLLNLACDLSDIK	No Carbamidomethyl(C)@11			0.0448707	1844.96	923.489	1844.92	923.467	2	12	1.1.1.3164.3	58.3465	80.32	79.89	58.38	1.82	3823.14
8	12.52	12.55	63.21	63.21	61.32	tr|T0E0I6|T0E0I6_CLOSO	Uncharacterized protein OS=Paeniclostridium sordellii ATCC 9714 GN=H477_1422 PE=4 SV=1			0	54.38	GLEDNLLNLACDLSDIK	Cation:K(E)@3; Oxidation(N)@5; Deamidated(N)@8; Carbamidomethyl(C)@11	Oxidation(N)@82		0.0594232	1956.93	653.319	1956.88	653.299	3	11	1.1.1.3164.2	58.312	109.85	99.28	58.39	0.45	3985.13
8	12.52	12.55	63.21	63.21	61.32	tr|T0E0I6|T0E0I6_CLOSO	Uncharacterized protein OS=Paeniclostridium sordellii ATCC 9714 GN=H477_1422 PE=4 SV=1			0	54.38	GLEDNLLNLACDLSDIK	Cation:K(E)@3; Deamidated(N)@5; Oxidation(N)@8; Carbamidomethyl(C)@11	Oxidation(N)@85		0.0594232	1956.93	653.319	1956.88	653.299	3	11	1.1.1.3164.2	58.312	109.85	99.28	58.39	0.45	3985.13
8	12.52	12.55	63.21	63.21	61.32	tr|T0E0I6|T0E0I6_CLOSO	Uncharacterized protein OS=Paeniclostridium sordellii ATCC 9714 GN=H477_1422 PE=4 SV=1			0	28.97	GLEDNLLNLACDLSDIK	Cation:K(E)@3; Oxidation(D)@4; Deamidated(N)@5; Carbamidomethyl(C)@11	Oxidation(D)@81		0.0594232	1956.93	653.319	1956.88	653.299	3	11	1.1.1.3164.2	58.312	109.85	99.28	58.39	0.45	3985.13
8	12.52	12.55	63.21	63.21	61.32	tr|T0E0I6|T0E0I6_CLOSO	Uncharacterized protein OS=Paeniclostridium sordellii ATCC 9714 GN=H477_1422 PE=4 SV=1			0	28.97	GLEDNLLNLACDLSDIK	Cation:K(E)@3; Oxidation(D)@4; Deamidated(N)@8; Carbamidomethyl(C)@11	Oxidation(D)@81		0.0594232	1956.93	653.319	1956.88	653.299	3	11	1.1.1.3164.2	58.312	109.85	99.28	58.39	0.45	3985.13
8	12.52	12.55	63.21	63.21	61.32	tr|T0E0I6|T0E0I6_CLOSO	Uncharacterized protein OS=Paeniclostridium sordellii ATCC 9714 GN=H477_1422 PE=4 SV=1			0	27.61	GLEDNLLNLACDLSDIK	Cation:K(D)@4; Deamidated(N)@5; Oxidation(N)@8; Carbamidomethyl(C)@11	Oxidation(N)@85		0.0594232	1956.93	653.319	1956.88	653.299	3	11	1.1.1.3164.2	58.312	109.85	99.28	58.39	0.45	3985.13
8	12.52	12.55	63.21	63.21	61.32	tr|T0E0I6|T0E0I6_CLOSO	Uncharacterized protein OS=Paeniclostridium sordellii ATCC 9714 GN=H477_1422 PE=4 SV=1			0	27.61	GLEDNLLNLACDLSDIK	Cation:K(D)@4; Oxidation(N)@5; Deamidated(N)@8; Carbamidomethyl(C)@11	Oxidation(N)@82		0.0594232	1956.93	653.319	1956.88	653.299	3	11	1.1.1.3164.2	58.312	109.85	99.28	58.39	0.45	3985.13
8	12.52	12.55	63.21	63.21	61.32	tr|T0E0I6|T0E0I6_CLOSO	Uncharacterized protein OS=Paeniclostridium sordellii ATCC 9714 GN=H477_1422 PE=4 SV=1			0	99	GLEDNLLNLACDLSDIKK	Carbamidomethyl(C)@11		missed K-K@17	0.040877	2030.08	677.699	2030.04	677.686	3	18	1.1.1.3100.2	53.0789	2380.42	2039.39	52.94	0.34	58551.1
8	12.52	12.55	63.21	63.21	61.32	tr|T0E0I6|T0E0I6_CLOSO	Uncharacterized protein OS=Paeniclostridium sordellii ATCC 9714 GN=H477_1422 PE=4 SV=1			0	99	GLEDNLLNLACDLSDIKK	Carbamidomethyl(C)@11		missed K-K@17	0.040877	2030.08	677.699	2030.04	677.686	3	16	1.1.1.3103.4	53.4885	2380.42	108.82	52.94	0.34	3811.13
8	12.52	12.55	63.21	63.21	61.32	tr|T0E0I6|T0E0I6_CLOSO	Uncharacterized protein OS=Paeniclostridium sordellii ATCC 9714 GN=H477_1422 PE=4 SV=1			0	99	GLEDNLLNLACDLSDIKK	Carbamidomethyl(C)@11; Carbamyl(K)@17		missed K-K@17	0.0486243	2073.09	692.037	2073.04	692.021	3	22	1.1.1.3151.2	57.1806	1950.42	1902.22	57.15	0.48	29564.3
8	12.52	12.55	63.21	63.21	61.32	tr|T0E0I6|T0E0I6_CLOSO	Uncharacterized protein OS=Paeniclostridium sordellii ATCC 9714 GN=H477_1422 PE=4 SV=1			0	99	GLEDNLLNLACDLSDIKK	Carbamidomethyl(C)@11; Carbamyl(K)@17		missed K-K@17	0.0486243	2073.09	692.037	2073.04	692.021	3	18	1.1.1.3157.2	57.5518	1950.42	497.8	57.15	0.48	6873.13
8	12.52	12.55	63.21	63.21	61.32	tr|T0E0I6|T0E0I6_CLOSO	Uncharacterized protein OS=Paeniclostridium sordellii ATCC 9714 GN=H477_1422 PE=4 SV=1			0	99	GLEDNLLNLACDLSDIKK	Carbamidomethyl(C)@11; Carbamyl(K)@17		missed K-K@17	0.0486243	2073.09	692.037	2073.04	692.021	3	14	1.1.1.3140.3	56.8277	1950.42	365.95	57.15	0.48	4827.13
8	12.52	12.55	63.21	63.21	61.32	tr|T0E0I6|T0E0I6_CLOSO	Uncharacterized protein OS=Paeniclostridium sordellii ATCC 9714 GN=H477_1422 PE=4 SV=1			0	99	GLEDNLLNLACDLSDIKK	Oxidation(N)@8; Carbamidomethyl(C)@11; Carbamyl(K)@17	Oxidation(N)@85	missed K-K@17	0.119103	2089.16	697.392	2089.04	697.353	3	14	1.1.1.3150.4	57.136	119.62	118.46	57.15	0.48	7735.13
8	12.52	12.55	63.21	63.21	61.32	tr|T0E0I6|T0E0I6_CLOSO	Uncharacterized protein OS=Paeniclostridium sordellii ATCC 9714 GN=H477_1422 PE=4 SV=1			0	99	GLEDNLLNLACDLSDIKK	Sulfide(D)@4; Carbamidomethyl(C)@11	Sulfide(D)@81	missed K-K@17	0.131113	2062.14	688.387	2062.01	688.343	3	13	1.1.1.3099.4	53.0342	91.71	91.29	53.04	0.79	5879.13
8	12.52	12.55	63.21	63.21	61.32	tr|T0E0I6|T0E0I6_CLOSO	Uncharacterized protein OS=Paeniclostridium sordellii ATCC 9714 GN=H477_1422 PE=4 SV=1			0	98.46	GLEDNLLNLACDLSDIKK	No Carbamidomethyl(C)@11		missed K-K@17	0.0241958	1973.04	658.687	1973.01	658.679	3	13	1.1.1.3099.3	52.9998	77.38	77.29	52.94	0.34	4460.07
8	12.52	12.55	63.21	63.21	61.32	tr|T0E0I6|T0E0I6_CLOSO	Uncharacterized protein OS=Paeniclostridium sordellii ATCC 9714 GN=H477_1422 PE=4 SV=1			0	48.81	GLEDNLLNLACDLSDIKK	Carbamidomethyl(C)@11; Oxidation(D)@12; Carbamyl(K)@17	Oxidation(D)@89	missed K-K@17	0.119103	2089.16	697.392	2089.04	697.353	3	15	1.1.1.3150.4	57.136	119.62	118.46	57.15	0.48	7735.13
8	12.52	12.55	63.21	63.21	61.32	tr|T0E0I6|T0E0I6_CLOSO	Uncharacterized protein OS=Paeniclostridium sordellii ATCC 9714 GN=H477_1422 PE=4 SV=1			0	54.38	WDNVCYYKCK	Carbamidomethyl(C)@5; Carbamyl(K)@8; Carbamidomethyl(C)@9		missed K-C@8	-0.000381033	1477.61	739.813	1477.61	739.813	2	10	1.1.1.2903.2	30.7046	314.56	297.76	30.67	0.23	9873.1
9	12.45	12.53	43.29	34.15	26.52	tr|T0CNF5|T0CNF5_CLOSO	Hsp70 family protein OS=Paeniclostridium sordellii ATCC 9714 GN=H477_2996 PE=3 SV=1			2	99	ADAESYLGQTVTEAVITVPAYFTDAQR				0.0574022	2915.48	972.833	2915.42	972.814	3	18	1.1.1.3140.2	56.7932	188.8	185.93	56.71	0.76	4735.13
9	12.45	12.53	43.29	34.15	26.52	tr|T0CNF5|T0CNF5_CLOSO	Hsp70 family protein OS=Paeniclostridium sordellii ATCC 9714 GN=H477_2996 PE=3 SV=1			2	99	ALQDAGLSTSEIDDVLLVGGSTR				0.0254794	2316.21	773.076	2316.18	773.068	3	20	1.1.1.3035.2	45.6979	238.25	233.1	45.67	0.45	10679.5
9	12.45	12.53	43.29	34.15	26.52	tr|T0CNF5|T0CNF5_CLOSO	Hsp70 family protein OS=Paeniclostridium sordellii ATCC 9714 GN=H477_2996 PE=3 SV=1			2	99	LGGDDFDQVIIDYLAEEFK				-0.0602163	2185.98	729.668	2186.04	729.688	3	19	1.1.1.3221.3	64.8195	371.56	286.66	64.96	0.42	5116.13
9	12.45	12.53	43.29	34.15	26.52	tr|T0CNF5|T0CNF5_CLOSO	Hsp70 family protein OS=Paeniclostridium sordellii ATCC 9714 GN=H477_2996 PE=3 SV=1			2	99	LGGDDFDQVIIDYLAEEFKK			missed K-K@19	0.0133025	2314.15	772.391	2314.14	772.386	3	19	1.1.1.3182.3	60.3899	799.66	162.63	60.08	0.34	4424.07
9	12.45	12.53	43.29	34.15	26.52	tr|T0CNF5|T0CNF5_CLOSO	Hsp70 family protein OS=Paeniclostridium sordellii ATCC 9714 GN=H477_2996 PE=3 SV=1			2	99	LGGDDFDQVIIDYLAEEFKKTEGVDLR	Oxidation(Y)@13; PyruvicAcidIminyl(K)@19	Oxidation(Y)@211; PyruvicAcidIminyl(K)@217	missed K-K@19; missed K-T@20	0.0278665	3170.56	1057.86	3170.53	1057.85	3	23	1.1.1.3247.4	67.4612	244.22	243.8	67.46	0.34	6640.13
9	12.45	12.53	43.29	34.15	26.52	tr|T0CNF5|T0CNF5_CLOSO	Hsp70 family protein OS=Paeniclostridium sordellii ATCC 9714 GN=H477_2996 PE=3 SV=1			1.74473	99	TTPSVVAFTK				-0.0162089	1049.56	525.787	1049.58	525.795	2	9	1.1.1.2909.2	31.3862	342.37	317.46	31.35	0.23	12974.2
9	12.45	12.53	43.29	34.15	26.52	tr|T0CNF5|T0CNF5_CLOSO	Hsp70 family protein OS=Paeniclostridium sordellii ATCC 9714 GN=H477_2996 PE=3 SV=1			0.614394	86.99	AKFDELTANLVEK			missed K-F@2	-0.012231	1476.77	493.264	1476.78	493.268	3	10	1.1.1.2938.4	34.7492	75.15	71.84	34.65	0.45	4704.07
9	12.45	12.53	43.29	34.15	26.52	tr|T0CNF5|T0CNF5_CLOSO	Hsp70 family protein OS=Paeniclostridium sordellii ATCC 9714 GN=H477_2996 PE=3 SV=1			0.0741724	31.1	IINEPTAAALAYGMDKLDQEK			missed K-L@16	0.0528043	2290.2	764.409	2290.15	764.391	3	9	1.1.1.3001.4	41.9058	143.6	98.36	41.7	0.45	6173.19
9	12.45	12.53	43.29	34.15	26.52	tr|T0CNF5|T0CNF5_CLOSO	Hsp70 family protein OS=Paeniclostridium sordellii ATCC 9714 GN=H477_2996 PE=3 SV=1			0.0199966	93.7	TTPSVVAFTKDGER	Carbamyl@N-term		missed K-D@10	0.0102372	1549.78	775.899	1549.77	775.894	2	11	1.1.1.2922.3	32.8972	250.5	239.68	32.83	0.34	10361.1
9	12.45	12.53	43.29	34.15	26.52	tr|T0CNF5|T0CNF5_CLOSO	Hsp70 family protein OS=Paeniclostridium sordellii ATCC 9714 GN=H477_2996 PE=3 SV=1			0.000434512	58.09	IAGLDVKR	Carbamyl(K)@7		missed K-R@7	-0.0218957	913.513	457.764	913.534	457.775	2	10	1.1.1.2891.3	29.3759	357.81	354.03	29.41	0.34	14242.1
9	12.45	12.53	43.29	34.15	26.52	tr|T0CNF5|T0CNF5_CLOSO	Hsp70 family protein OS=Paeniclostridium sordellii ATCC 9714 GN=H477_2996 PE=3 SV=1			0	99	ADAESYLGQTVTEAVITVPAYFTDAQR				0.0574022	2915.48	972.833	2915.42	972.814	3	12	1.1.1.3134.2	56.4565	188.8	132.38	56.71	0.76	4038.13
9	12.45	12.53	43.29	34.15	26.52	tr|T0CNF5|T0CNF5_CLOSO	Hsp70 family protein OS=Paeniclostridium sordellii ATCC 9714 GN=H477_2996 PE=3 SV=1			0	99	ALQDAGLSTSEIDDVLLVGGSTR				0.0593672	2316.24	1159.13	2316.18	1159.1	2	18	1.1.1.3035.4	45.7668	216.49	211.6	45.67	0.34	8822.25
9	12.45	12.53	43.29	34.15	26.52	tr|T0CNF5|T0CNF5_CLOSO	Hsp70 family protein OS=Paeniclostridium sordellii ATCC 9714 GN=H477_2996 PE=3 SV=1			0	19.6	IINEPTAAALAYGMDK	Methyl(E)@4; Dehydrated(T)@6	Methyl(E)@147; Dehydrated(T)@149		-0.0884911	1672.76	837.388	1672.85	837.432	2	11	1.1.1.2960.4	37.2485	2399.75	117.57	36.58	0.34	9052.19
9	12.45	12.53	43.29	34.15	26.52	tr|T0CNF5|T0CNF5_CLOSO	Hsp70 family protein OS=Paeniclostridium sordellii ATCC 9714 GN=H477_2996 PE=3 SV=1			0	45.16	IPAVQEALR	Arg->Orn(R)@9			-0.0161394	953.538	477.776	953.555	477.785	2	8	1.1.1.2879.4	28.0471	186.93	174.63	27.95	0.23	7663.13
9	12.45	12.53	43.29	34.15	26.52	tr|T0CNF5|T0CNF5_CLOSO	Hsp70 family protein OS=Paeniclostridium sordellii ATCC 9714 GN=H477_2996 PE=3 SV=1			0	99	LGGDDFDQVIIDYLAEEFK				-0.0148627	2186.03	1094.02	2186.04	1094.03	2	21	1.1.1.3220.4	64.7404	331.98	209.96	64.96	0.42	4747.25
9	12.45	12.53	43.29	34.15	26.52	tr|T0CNF5|T0CNF5_CLOSO	Hsp70 family protein OS=Paeniclostridium sordellii ATCC 9714 GN=H477_2996 PE=3 SV=1			0	99	LGGDDFDQVIIDYLAEEFKK			missed K-K@19	0.0133025	2314.15	772.391	2314.14	772.386	3	24	1.1.1.3179.2	60.0149	799.66	756.44	60.08	0.34	13465
9	12.45	12.53	43.29	34.15	26.52	tr|T0CNF5|T0CNF5_CLOSO	Hsp70 family protein OS=Paeniclostridium sordellii ATCC 9714 GN=H477_2996 PE=3 SV=1			0	99	LGGDDFDQVIIDYLAEEFKK	Carbamyl(K)@19		missed K-K@19	-0.0436801	2357.1	786.707	2357.14	786.721	3	20	1.1.1.3208.4	63.3776	270.49	267.86	63.38	0.34	5910.13
9	12.45	12.53	43.29	34.15	26.52	tr|T0CNF5|T0CNF5_CLOSO	Hsp70 family protein OS=Paeniclostridium sordellii ATCC 9714 GN=H477_2996 PE=3 SV=1			0	99	LGGDDFDQVIIDYLAEEFKK	Carbamyl(K)@19		missed K-K@19	-0.0436801	2357.1	786.707	2357.14	786.721	3	13	1.1.1.3211.4	63.7184	270.49	69.72	63.38	0.34	1899.19
9	12.45	12.53	43.29	34.15	26.52	tr|T0CNF5|T0CNF5_CLOSO	Hsp70 family protein OS=Paeniclostridium sordellii ATCC 9714 GN=H477_2996 PE=3 SV=1			0	17.76	LGGDDFDQVIIDYLAEEFKKTEGVDLR	Malonyl(K)@19	Malonyl(K)@217	missed K-K@19; missed K-T@20	0.0278665	3170.56	1057.86	3170.53	1057.85	3	21	1.1.1.3247.4	67.4612	244.22	243.8	67.46	0.34	6640.13
10	11.29	11.35	25.64	25.64	25.64	tr|T0E9M9|T0E9M9_CLOSO	Pyruvate flavodoxin/ferredoxin oxidoreductase, thiamine diP-bdg family protein OS=Paeniclostridium sordellii ATCC 9714 GN=H477_1151 PE=4 SV=1			2	99	ALASQALSIFGDHQDVMSAR				0.011357	2116.05	706.357	2116.04	706.353	3	18	1.1.1.3003.3	42.0984	311.11	301.1	42.03	0.23	26670.1
10	11.29	11.35	25.64	25.64	25.64	tr|T0E9M9|T0E9M9_CLOSO	Pyruvate flavodoxin/ferredoxin oxidoreductase, thiamine diP-bdg family protein OS=Paeniclostridium sordellii ATCC 9714 GN=H477_1151 PE=4 SV=1			2	99	GTAQNPDIYFQTR				0.0185257	1509.74	755.877	1509.72	755.868	2	13	1.1.1.2916.3	32.2158	342.17	304.33	32.15	0.34	8668.89
10	11.29	11.35	25.64	25.64	25.64	tr|T0E9M9|T0E9M9_CLOSO	Pyruvate flavodoxin/ferredoxin oxidoreductase, thiamine diP-bdg family protein OS=Paeniclostridium sordellii ATCC 9714 GN=H477_1151 PE=4 SV=1			2	99	LLNMEAVQEFR				-0.00345578	1348.68	675.346	1348.68	675.348	2	13	1.1.1.2977.2	39.111	165.3	153.73	39.07	0.34	9405.19
10	11.29	11.35	25.64	25.64	25.64	tr|T0E9M9|T0E9M9_CLOSO	Pyruvate flavodoxin/ferredoxin oxidoreductase, thiamine diP-bdg family protein OS=Paeniclostridium sordellii ATCC 9714 GN=H477_1151 PE=4 SV=1			2	99	LPFIHFFDGFR				-0.0147641	1394.7	465.907	1394.71	465.912	3	8	1.1.1.3092.4	52.2394	194.04	104.24	52.02	0.45	2198.06
10	11.29	11.35	25.64	25.64	25.64	tr|T0E9M9|T0E9M9_CLOSO	Pyruvate flavodoxin/ferredoxin oxidoreductase, thiamine diP-bdg family protein OS=Paeniclostridium sordellii ATCC 9714 GN=H477_1151 PE=4 SV=1			2	99	VAGELLPGVFHVSAR				-0.0112051	1550.85	517.956	1550.86	517.96	3	12	1.1.1.2980.2	39.4518	140.08	132.21	39.42	0.23	12197
10	11.29	11.35	25.64	25.64	25.64	tr|T0E9M9|T0E9M9_CLOSO	Pyruvate flavodoxin/ferredoxin oxidoreductase, thiamine diP-bdg family protein OS=Paeniclostridium sordellii ATCC 9714 GN=H477_1151 PE=4 SV=1			1.29243	97.4	ALSPNHPVTR				-0.0391347	1090.55	546.282	1090.59	546.301	2	9	1.1.1.2862.4	26.1154	77.86	69.25	26.01	0.23	2843.13
10	11.29	11.35	25.64	25.64	25.64	tr|T0E9M9|T0E9M9_CLOSO	Pyruvate flavodoxin/ferredoxin oxidoreductase, thiamine diP-bdg family protein OS=Paeniclostridium sordellii ATCC 9714 GN=H477_1151 PE=4 SV=1			0	98.56	ALASQALSIFGDHQDVMSAR	Deoxy(D)@15	Deoxy(D)@37		0.0329644	2100.07	701.032	2100.04	701.021	3	13	1.1.1.2998.3	41.5308	201.82	189.29	41.57	0.34	10889.2
10	11.29	11.35	25.64	25.64	25.64	tr|T0E9M9|T0E9M9_CLOSO	Pyruvate flavodoxin/ferredoxin oxidoreductase, thiamine diP-bdg family protein OS=Paeniclostridium sordellii ATCC 9714 GN=H477_1151 PE=4 SV=1			0	98.91	LPFIHFFDGFR				-0.0147641	1394.7	465.907	1394.71	465.912	3	9	1.1.1.3089.3	51.8644	194.04	151.94	52.02	0.45	3044.13
11	9.44	9.44	33.94	33.94	33.94	tr|T0D341|T0D341_CLOSO	(R)-2-hydroxyglutaryl-CoA dehydratase subunit alpha OS=Paeniclostridium sordellii ATCC 9714 GN=hgdA PE=4 SV=1			2	99	AYSGMFNNVNLDK				0.0426803	1471.72	736.867	1471.68	736.846	2	13	1.1.1.2941.4	35.09	138.95	132.54	34.99	0.23	8577.06
11	9.44	9.44	33.94	33.94	33.94	tr|T0D341|T0D341_CLOSO	(R)-2-hydroxyglutaryl-CoA dehydratase subunit alpha OS=Paeniclostridium sordellii ATCC 9714 GN=hgdA PE=4 SV=1			2	99	IMMEGIPCWPTIGFK	Carbamidomethyl(C)@8			0.0426675	1778.9	890.457	1778.86	890.435	2	12	1.1.1.3074.2	50.1264	187.55	163.2	50.21	0.45	6966.13
11	9.44	9.44	33.94	33.94	33.94	tr|T0D341|T0D341_CLOSO	(R)-2-hydroxyglutaryl-CoA dehydratase subunit alpha OS=Paeniclostridium sordellii ATCC 9714 GN=hgdA PE=4 SV=1			2	99	IPSAGFDGDQADPR				-0.000488771	1444.66	723.336	1444.66	723.336	2	15	1.1.1.2882.4	28.388	180.23	179.62	28.38	0.34	9247.25
11	9.44	9.44	33.94	33.94	33.94	tr|T0D341|T0D341_CLOSO	(R)-2-hydroxyglutaryl-CoA dehydratase subunit alpha OS=Paeniclostridium sordellii ATCC 9714 GN=hgdA PE=4 SV=1			2	99	IQGLVEVMEER				0.0106079	1301.68	651.845	1301.66	651.84	2	13	1.1.1.2968.2	38.0886	496.26	387.66	38.18	0.34	11498
11	9.44	9.44	33.94	33.94	33.94	tr|T0D341|T0D341_CLOSO	(R)-2-hydroxyglutaryl-CoA dehydratase subunit alpha OS=Paeniclostridium sordellii ATCC 9714 GN=hgdA PE=4 SV=1			0.739929	99	AQFEEAIKELEKISGK	Carbamyl@N-term		missed K-E@8; missed K-I@12	0.0424484	1862.02	621.681	1861.98	621.667	3	15	1.1.1.3052.4	47.6971	136.9	136.58	47.61	0.34	7360.32
11	9.44	9.44	33.94	33.94	33.94	tr|T0D341|T0D341_CLOSO	(R)-2-hydroxyglutaryl-CoA dehydratase subunit alpha OS=Paeniclostridium sordellii ATCC 9714 GN=hgdA PE=4 SV=1			0.665546	99	SCKLMSLIQYEMQR	Carbamidomethyl(C)@2; Carbamyl(K)@3		missed K-L@3	0.0121142	1828.88	915.445	1828.86	915.439	2	14	1.1.1.3068.3	49.4796	189.84	177.77	49.52	0.45	8199.07
11	9.44	9.44	33.94	33.94	33.94	tr|T0D341|T0D341_CLOSO	(R)-2-hydroxyglutaryl-CoA dehydratase subunit alpha OS=Paeniclostridium sordellii ATCC 9714 GN=hgdA PE=4 SV=1			0.033389	99	AFTKAQFETR	Carbamyl(K)@4		missed K-A@4	-0.00246079	1240.62	621.316	1240.62	621.317	2	11	1.1.1.2902.2	30.591	435.79	421.39	30.65	0.34	17627.9
12	8.51	8.52	66.22	66.22	66.22	tr|T0CMC7|T0CMC7_CLOSO	Uncharacterized protein OS=Paeniclostridium sordellii ATCC 9714 GN=H477_1423 PE=4 SV=1			2	99	ALDDVVDCLSER	Carbamidomethyl(C)@8			0.00476291	1390.64	696.33	1390.64	696.327	2	18	1.1.1.2955.2	36.6115	2092.63	1226.18	36.8	0.34	27101.1
12	8.51	8.52	66.22	66.22	66.22	tr|T0CMC7|T0CMC7_CLOSO	Uncharacterized protein OS=Paeniclostridium sordellii ATCC 9714 GN=H477_1423 PE=4 SV=1			2	99	DLNQILPDQQNAIEDIKDAK			missed K-D@17	0.0484036	2280.21	761.077	2280.16	761.061	3	20	1.1.1.2974.3	38.8046	681.62	604.39	38.86	0.34	23922.2
12	8.51	8.52	66.22	66.22	66.22	tr|T0CMC7|T0CMC7_CLOSO	Uncharacterized protein OS=Paeniclostridium sordellii ATCC 9714 GN=H477_1423 PE=4 SV=1			2	99	GILDKLNKALDDVVDCLSER	Carbamyl(K)@8; Carbamidomethyl(C)@16		missed K-L@5; missed K-A@8	-0.0351574	2315.14	772.722	2315.18	772.734	3	16	1.1.1.3243.2	67.0071	1134.37	120	66.45	0.33	3571.13
12	8.51	8.52	66.22	66.22	66.22	tr|T0CMC7|T0CMC7_CLOSO	Uncharacterized protein OS=Paeniclostridium sordellii ATCC 9714 GN=H477_1423 PE=4 SV=1			2	99	LNKALDDVVDCLSER	Carbamyl(K)@3; Carbamidomethyl(C)@11		missed K-A@3	0.0133415	1788.88	895.448	1788.87	895.441	2	15	1.1.1.3009.3	42.78	685.28	356.77	42.59	0.34	12484.1
12	8.51	8.52	66.22	66.22	66.22	tr|T0CMC7|T0CMC7_CLOSO	Uncharacterized protein OS=Paeniclostridium sordellii ATCC 9714 GN=H477_1423 PE=4 SV=1			0.413413	80.82	GILDKLNK			missed K-L@5	-0.0238689	899.52	450.767	899.544	450.779	2	8	1.1.1.2898.4	30.2056	143.7	143.52	30.2	0.34	5274.13
12	8.51	8.52	66.22	66.22	66.22	tr|T0CMC7|T0CMC7_CLOSO	Uncharacterized protein OS=Paeniclostridium sordellii ATCC 9714 GN=H477_1423 PE=4 SV=1			0.0644927	99	KDKQKEVKGILDKLNKALDDVVDCLSER	Deamidated(N)@15; Carbamidomethyl(C)@24		cleaved A-K@N-term; missed K-D@1; missed K-Q@3; missed K-E@5; missed K-G@8; missed K-L@13; missed K-A@16	0.0809392	3256.81	815.211	3256.73	815.191	4	14	1.1.1.3248.4	67.5748	97.25	96.74	67.58	0.79	2601.13
12	8.51	8.52	66.22	66.22	66.22	tr|T0CMC7|T0CMC7_CLOSO	Uncharacterized protein OS=Paeniclostridium sordellii ATCC 9714 GN=H477_1423 PE=4 SV=1			0.0296531	99	KEVKGILDKLNKALDDVVDCLSER	Deamidated(N)@11; Carbamidomethyl(C)@20		cleaved Q-K@N-term; missed K-E@1; missed K-G@4; missed K-L@9; missed K-A@12	0.0155266	2757.47	920.165	2757.46	920.16	3	14	1.1.1.3264.2	69.3209	673.51	671.52	69.31	0.23	34779.2
12	8.51	8.52	66.22	66.22	66.22	tr|T0CMC7|T0CMC7_CLOSO	Uncharacterized protein OS=Paeniclostridium sordellii ATCC 9714 GN=H477_1423 PE=4 SV=1			0.00130484	99	EVKGILDKLNKALDDVVDCLSER	Carbamyl@N-term; Carbamyl(K)@11; Carbamidomethyl(C)@19		missed K-G@3; missed K-L@8; missed K-A@11	0.000490415	2714.39	905.804	2714.39	905.804	3	15	1.1.1.3247.2	67.3922	748.86	644.8	67.47	0.23	11807.1
12	8.51	8.52	66.22	66.22	66.22	tr|T0CMC7|T0CMC7_CLOSO	Uncharacterized protein OS=Paeniclostridium sordellii ATCC 9714 GN=H477_1423 PE=4 SV=1			0	99	ALDDVVDCLSER	Carbamidomethyl(C)@8			0.00476291	1390.64	696.33	1390.64	696.327	2	17	1.1.1.2958.2	36.9523	2092.63	1548.96	36.8	0.34	42829.2
12	8.51	8.52	66.22	66.22	66.22	tr|T0CMC7|T0CMC7_CLOSO	Uncharacterized protein OS=Paeniclostridium sordellii ATCC 9714 GN=H477_1423 PE=4 SV=1			0	98.56	ALDDVVDCLSER	Oxidation(D)@7; Carbamidomethyl(C)@8	Oxidation(D)@45		0.0294125	1406.66	704.339	1406.63	704.325	2	12	1.1.1.2956.2	36.7251	209.15	184.1	36.8	0.45	10193.1
12	8.51	8.52	66.22	66.22	66.22	tr|T0CMC7|T0CMC7_CLOSO	Uncharacterized protein OS=Paeniclostridium sordellii ATCC 9714 GN=H477_1423 PE=4 SV=1			0	98.56	ALDDVVDCLSER	Oxidation(D)@4; Carbamidomethyl(C)@8	Oxidation(D)@42		0.0294125	1406.66	704.339	1406.63	704.325	2	11	1.1.1.2956.2	36.7251	209.15	184.1	36.8	0.45	10193.1
12	8.51	8.52	66.22	66.22	66.22	tr|T0CMC7|T0CMC7_CLOSO	Uncharacterized protein OS=Paeniclostridium sordellii ATCC 9714 GN=H477_1423 PE=4 SV=1			0	99	GILDKLNKALDDVVDCLSER	Carbamyl(K)@8; Carbamidomethyl(C)@16		missed K-L@5; missed K-A@8	-0.0351574	2315.14	772.722	2315.18	772.734	3	17	1.1.1.3234.2	66.2266	1134.37	405.09	66.45	0.33	5165.13
12	8.51	8.52	66.22	66.22	66.22	tr|T0CMC7|T0CMC7_CLOSO	Uncharacterized protein OS=Paeniclostridium sordellii ATCC 9714 GN=H477_1423 PE=4 SV=1			0	99	GILDKLNKALDDVVDCLSER	Carbamyl(K)@8; Carbamidomethyl(C)@16		missed K-L@5; missed K-A@8	-0.0351574	2315.14	772.722	2315.18	772.734	3	21	1.1.1.3240.2	66.6665	1134.37	707	66.45	0.33	10972
12	8.51	8.52	66.22	66.22	66.22	tr|T0CMC7|T0CMC7_CLOSO	Uncharacterized protein OS=Paeniclostridium sordellii ATCC 9714 GN=H477_1423 PE=4 SV=1			0	99	GILDKLNKALDDVVDCLSER	Malonyl(K)@5; Carbamidomethyl(C)@16	Malonyl(K)@35	missed K-L@5; missed K-A@8	-0.0237855	2358.15	787.057	2358.17	787.065	3	21	1.1.1.3265.2	69.4343	1450.79	1412.94	69.41	0.23	81219.1
12	8.51	8.52	66.22	66.22	66.22	tr|T0CMC7|T0CMC7_CLOSO	Uncharacterized protein OS=Paeniclostridium sordellii ATCC 9714 GN=H477_1423 PE=4 SV=1			0	99	GILDKLNKALDDVVDCLSER	Malonyl(K)@8; Carbamidomethyl(C)@16	Malonyl(K)@38	missed K-L@5; missed K-A@8	-0.0237855	2358.15	787.057	2358.17	787.065	3	21	1.1.1.3265.2	69.4343	1450.79	1412.94	69.41	0.23	81219.1
12	8.51	8.52	66.22	66.22	66.22	tr|T0CMC7|T0CMC7_CLOSO	Uncharacterized protein OS=Paeniclostridium sordellii ATCC 9714 GN=H477_1423 PE=4 SV=1			0	46.98	GILDKLNKALDDVVDCLSER	Carbamyl(K)@8; Carbamidomethyl(C)@16		missed K-L@5; missed K-A@8	0.0407725	2315.22	1158.62	2315.18	1158.6	2	11	1.1.1.3239.2	66.5529	140.87	132.96	66.52	0.67	4281.12
12	8.51	8.52	66.22	66.22	66.22	tr|T0CMC7|T0CMC7_CLOSO	Uncharacterized protein OS=Paeniclostridium sordellii ATCC 9714 GN=H477_1423 PE=4 SV=1			0	98.56	IKDLNQILPDQQNAIEDIKDAK	QQQTGG(K)@2; Oxidation(N)@5; Deamidated(Q)@6	QQQTGG(K)@3; Oxidation(N)@6	cleaved M-I@N-term; missed K-D@2; missed K-D@19	0.058457	3137.64	1046.89	3137.58	1046.87	3	16	1.1.1.3066.4	49.287	355.72	330.87	49.4	0.34	14047.2
12	8.51	8.52	66.22	66.22	66.22	tr|T0CMC7|T0CMC7_CLOSO	Uncharacterized protein OS=Paeniclostridium sordellii ATCC 9714 GN=H477_1423 PE=4 SV=1			0	99	LNKALDDVVDCLSER	Carbamyl(K)@3; Carbamidomethyl(C)@11		missed K-A@3	0.0133415	1788.88	895.448	1788.87	895.441	2	16	1.1.1.3006.3	42.4392	685.28	570.36	42.59	0.34	25664.1
12	8.51	8.52	66.22	66.22	66.22	tr|T0CMC7|T0CMC7_CLOSO	Uncharacterized protein OS=Paeniclostridium sordellii ATCC 9714 GN=H477_1423 PE=4 SV=1			0	36.52	QKEVKGILDKLNKALDDVVDCLSER	Arg-add@N-term; Oxidation(N)@12; Carbamidomethyl(C)@21	Oxidation(N)@37	missed K-E@2; missed K-G@5; missed K-L@10; missed K-A@13	-0.110301	3056.52	1019.85	3056.63	1019.88	3	11	1.1.1.3265.3	69.4689	158.42	156.32	69.49	0.34	9444.73
13	8.43	8.46	40.39	40.39	39.41	tr|T0DRL7|T0DRL7_CLOSO	Uncharacterized protein OS=Paeniclostridium sordellii ATCC 9714 GN=H477_2973 PE=4 SV=1			2	99	ETELFWDQIMMEHALFIR				0.0922056	2308.19	770.405	2308.1	770.375	3	15	1.1.1.3128.2	56.2232	239.19	219.04	56.33	0.51	5855.12
13	8.43	8.46	40.39	40.39	39.41	tr|T0DRL7|T0DRL7_CLOSO	Uncharacterized protein OS=Paeniclostridium sordellii ATCC 9714 GN=H477_2973 PE=4 SV=1			2	99	LLNGVLSCNLFTGNYPLLIEHILR	Deamidated(N)@3; Carbamidomethyl(C)@8			-0.0239759	2769.46	924.162	2769.49	924.17	3	15	1.1.1.3195.2	61.8316	306.58	227.6	62.01	0.34	5544.19
13	8.43	8.46	40.39	40.39	39.41	tr|T0DRL7|T0DRL7_CLOSO	Uncharacterized protein OS=Paeniclostridium sordellii ATCC 9714 GN=H477_2973 PE=4 SV=1			2	99	LYLSLVQDLENR				0.0345868	1461.82	731.916	1461.78	731.899	2	12	1.1.1.3040.3	46.3002	138.75	134.62	46.24	0.45	9110.12
13	8.43	8.46	40.39	40.39	39.41	tr|T0DRL7|T0DRL7_CLOSO	Uncharacterized protein OS=Paeniclostridium sordellii ATCC 9714 GN=H477_2973 PE=4 SV=1			2	99	SIILPLLADHVLR				-0.0305911	1458.86	487.295	1458.89	487.305	3	14	1.1.1.3061.3	48.6848	1863.57	676.29	48.96	0.34	5423.12
13	8.43	8.46	40.39	40.39	39.41	tr|T0DRL7|T0DRL7_CLOSO	Uncharacterized protein OS=Paeniclostridium sordellii ATCC 9714 GN=H477_2973 PE=4 SV=1			0.37366	95.41	LLINGLISFK	Deamidated(N)@4			-0.00348454	1117.67	559.843	1117.67	559.845	2	11	1.1.1.3045.2	46.8334	162.71	156.25	46.8	0.34	9032.06
13	8.43	8.46	40.39	40.39	39.41	tr|T0DRL7|T0DRL7_CLOSO	Uncharacterized protein OS=Paeniclostridium sordellii ATCC 9714 GN=H477_2973 PE=4 SV=1			0.0594835	99	SNKETELFWDQIMMEHALFIR	Carbamyl(K)@3		missed K-E@3	0.149341	2680.43	894.483	2680.28	894.433	3	14	1.1.1.3127.2	56.1097	228.69	216.51	56.17	0.31	7115.19
13	8.43	8.46	40.39	40.39	39.41	tr|T0DRL7|T0DRL7_CLOSO	Uncharacterized protein OS=Paeniclostridium sordellii ATCC 9714 GN=H477_2973 PE=4 SV=1			0.000434512	87.42	LLINGLISFKER	Deamidated(N)@4; Carbamyl(K)@10		missed K-E@10	0.0327383	1445.86	723.936	1445.82	723.919	2	11	1.1.1.3038.4	46.1076	109.78	93.65	46	0.79	4850.13
13	8.43	8.46	40.39	40.39	39.41	tr|T0DRL7|T0DRL7_CLOSO	Uncharacterized protein OS=Paeniclostridium sordellii ATCC 9714 GN=H477_2973 PE=4 SV=1			0	99	ETELFWDQIMMEHALFIR				0.0922056	2308.19	770.405	2308.1	770.375	3	14	1.1.1.3135.2	56.5701	239.19	156.96	56.33	0.51	4358.07
13	8.43	8.46	40.39	40.39	39.41	tr|T0DRL7|T0DRL7_CLOSO	Uncharacterized protein OS=Paeniclostridium sordellii ATCC 9714 GN=H477_2973 PE=4 SV=1			0	99	ETELFWDQIMMEHALFIR	Oxidation(H)@13			0.160146	2324.26	775.76	2324.1	775.706	3	12	1.1.1.3116.2	54.8953	118.1	117.63	54.87	0.45	4660.13
13	8.43	8.46	40.39	40.39	39.41	tr|T0DRL7|T0DRL7_CLOSO	Uncharacterized protein OS=Paeniclostridium sordellii ATCC 9714 GN=H477_2973 PE=4 SV=1			0	56.24	LLINGLISFK	Deamidated(N)@4			-0.00580354	1117.67	559.842	1117.67	559.845	2	8	1.1.1.3063.3	48.9119	56.72	53.42	48.84	0.91	3150.13
13	8.43	8.46	40.39	40.39	39.41	tr|T0DRL7|T0DRL7_CLOSO	Uncharacterized protein OS=Paeniclostridium sordellii ATCC 9714 GN=H477_2973 PE=4 SV=1			0	99	SIILPLLADHVLR				-0.0305911	1458.86	487.295	1458.89	487.305	3	14	1.1.1.3064.2	48.9909	1863.57	1768.09	48.96	0.34	27559.1
13	8.43	8.46	40.39	40.39	39.41	tr|T0DRL7|T0DRL7_CLOSO	Uncharacterized protein OS=Paeniclostridium sordellii ATCC 9714 GN=H477_2973 PE=4 SV=1			0	99	SIILPLLADHVLR				-0.0305911	1458.86	487.295	1458.89	487.305	3	11	1.1.1.3067.3	49.3661	1863.57	239.33	48.96	0.34	3303.13
14	8	8	37.02	37.02	35.91	tr|T0EAX3|T0EAX3_CLOSO	Reverse rubrerythrin-1 OS=Paeniclostridium sordellii ATCC 9714 GN=H477_0314 PE=4 SV=1			2	99	AFLGLLNR				0.000924008	902.535	452.275	902.534	452.274	2	8	1.1.1.2986.4	40.2025	121.27	120.31	40.2	0.34	4698.19
14	8	8	37.02	37.02	35.91	tr|T0EAX3|T0EAX3_CLOSO	Reverse rubrerythrin-1 OS=Paeniclostridium sordellii ATCC 9714 GN=H477_0314 PE=4 SV=1			2	99	EGFPEVAEAYKR			missed K-R@11	-0.0282821	1394.65	465.892	1394.68	465.902	3	11	1.1.1.2911.4	31.6823	134.82	113.03	31.58	0.23	4691.07
14	8	8	37.02	37.02	35.91	tr|T0EAX3|T0EAX3_CLOSO	Reverse rubrerythrin-1 OS=Paeniclostridium sordellii ATCC 9714 GN=H477_0314 PE=4 SV=1			2	99	IAFEEAEHAAKFAELLGEVVVADTQANLK	Carbamyl(K)@11		missed K-F@11	0.00746761	3155.62	1052.88	3155.61	1052.88	3	23	1.1.1.3250.2	67.7327	334.43	331.99	67.71	0.34	14215
14	8	8	37.02	37.02	35.91	tr|T0EAX3|T0EAX3_CLOSO	Reverse rubrerythrin-1 OS=Paeniclostridium sordellii ATCC 9714 GN=H477_0314 PE=4 SV=1			2	99	IGVAQGVDEEILEGLR				0.0215767	1696.92	849.468	1696.9	849.457	2	17	1.1.1.3028.2	44.9028	616.9	315.5	44.74	0.34	8354
14	8	8	37.02	37.02	35.91	tr|T0EAX3|T0EAX3_CLOSO	Reverse rubrerythrin-1 OS=Paeniclostridium sordellii ATCC 9714 GN=H477_0314 PE=4 SV=1			0	65.26	IAFEEAEHAAKFAELLGEVVVADTQANLKAR	Carbamyl@N-term; Carbamyl(K)@29		missed K-F@11; missed K-A@29	0.156765	3425.92	857.486	3425.76	857.447	4	20	1.1.1.3251.2	67.8462	370.38	361.88	67.82	0.34	19708.1
14	8	8	37.02	37.02	35.91	tr|T0EAX3|T0EAX3_CLOSO	Reverse rubrerythrin-1 OS=Paeniclostridium sordellii ATCC 9714 GN=H477_0314 PE=4 SV=1			0	99	IGVAQGVDEEILEGLR				0.0215767	1696.92	849.468	1696.9	849.457	2	17	1.1.1.3025.3	44.5966	616.9	520.31	44.74	0.34	12748.1
15	7.84	7.92	19.94	16.13	13.49	tr|T0E6E7|T0E6E7_CLOSO	Acyl-CoA dehydrogenase, N-terminal domain protein OS=Paeniclostridium sordellii ATCC 9714 GN=H477_0355 PE=3 SV=1			2	99	IGVAAQALGVAQGALDEAIK				-0.0066517	1894.05	632.356	1894.05	632.358	3	22	1.1.1.3076.3	50.388	339.12	300.65	50.44	0.34	9529.25
15	7.84	7.92	19.94	16.13	13.49	tr|T0E6E7|T0E6E7_CLOSO	Acyl-CoA dehydrogenase, N-terminal domain protein OS=Paeniclostridium sordellii ATCC 9714 GN=H477_0355 PE=3 SV=1			2	99	IGVAAQALGVAQGALDEAIKYTK	Carbamyl(K)@20		missed K-Y@20	0.0554631	2329.32	777.447	2329.26	777.429	3	21	1.1.1.3168.3	58.8005	216.52	189.47	58.85	0.34	5680.12
15	7.84	7.92	19.94	16.13	13.49	tr|T0E6E7|T0E6E7_CLOSO	Acyl-CoA dehydrogenase, N-terminal domain protein OS=Paeniclostridium sordellii ATCC 9714 GN=H477_0355 PE=3 SV=1			2	99	IGVAAQALGVAQGALDEAIKYTKER	Malonyl(K)@20	Malonyl(K)@261	missed K-Y@20; missed K-E@23	-0.00220566	2657.4	886.807	2657.4	886.808	3	22	1.1.1.3193.4	61.6735	539.94	526.59	61.69	0.34	12201.1
15	7.84	7.92	19.94	16.13	13.49	tr|T0E6E7|T0E6E7_CLOSO	Acyl-CoA dehydrogenase, N-terminal domain protein OS=Paeniclostridium sordellii ATCC 9714 GN=H477_0355 PE=3 SV=1			1.42022	99	KTFITNAPICDFAIVIAVTDR	Carbamyl@N-term; Carbamidomethyl(C)@10		missed K-T@1	0.0241988	2407.28	803.434	2407.26	803.426	3	15	1.1.1.3173.3	59.3682	141.38	135.49	59.41	0.45	5396.07
15	7.84	7.92	19.94	16.13	13.49	tr|T0E6E7|T0E6E7_CLOSO	Acyl-CoA dehydrogenase, N-terminal domain protein OS=Paeniclostridium sordellii ATCC 9714 GN=H477_0355 PE=3 SV=1			0.39794	81.99	WLVYDAAQK				-0.00562321	1092.55	547.285	1092.56	547.287	2	9	1.1.1.2935.3	34.374	105.41	98.46	34.31	0.68	7327
15	7.84	7.92	19.94	16.13	13.49	tr|T0E6E7|T0E6E7_CLOSO	Acyl-CoA dehydrogenase, N-terminal domain protein OS=Paeniclostridium sordellii ATCC 9714 GN=H477_0355 PE=3 SV=1			0	99	IGVAAQALGVAQGALDEAIKYTKER	Malonyl(K)@20	Malonyl(K)@261	missed K-Y@20; missed K-E@23	-0.00220566	2657.4	886.807	2657.4	886.808	3	17	1.1.1.3196.3	61.9796	539.94	219.85	61.69	0.34	4620.19
16	7.5	7.72	49.28	49.28	31.65	tr|T0CR24|T0CR24_CLOSO	Uncharacterized protein OS=Paeniclostridium sordellii ATCC 9714 GN=H477_2788 PE=4 SV=1			2	99	AQNENEQAKCLFSQAMK	Carbamyl(K)@9; Carbamidomethyl(C)@10		missed K-C@9	0.0346659	2038.96	1020.49	2038.92	1020.47	2	19	1.1.1.2960.3	37.214	420.91	401.35	37.25	0.23	13079
16	7.5	7.72	49.28	49.28	31.65	tr|T0CR24|T0CR24_CLOSO	Uncharacterized protein OS=Paeniclostridium sordellii ATCC 9714 GN=H477_2788 PE=4 SV=1			2	99	TCYVDLGMNEPCK	Carbamidomethyl(C)@2; Carbamidomethyl(C)@12			0.0185405	1585.68	793.845	1585.66	793.836	2	14	1.1.1.2918.4	32.4774	176.77	137.42	32.37	0.34	4232.19
16	7.5	7.72	49.28	49.28	31.65	tr|T0CR24|T0CR24_CLOSO	Uncharacterized protein OS=Paeniclostridium sordellii ATCC 9714 GN=H477_2788 PE=4 SV=1			1.45593	99	QANDLLCR	Gln->pyro-Glu@N-term; Carbamidomethyl(C)@7			0.0105669	971.46	486.737	971.449	486.732	2	9	1.1.1.2911.3	31.6478	168.59	151.57	31.58	0.68	6918.12
16	7.5	7.72	49.28	49.28	31.65	tr|T0CR24|T0CR24_CLOSO	Uncharacterized protein OS=Paeniclostridium sordellii ATCC 9714 GN=H477_2788 PE=4 SV=1			1.29243	98.29	CLFSQAMK	Carbamidomethyl(C)@1			-0.0108135	983.446	492.73	983.457	492.736	2	9	1.1.1.2915.3	32.1022	624.63	533.03	32.24	0.34	16243.8
16	7.5	7.72	49.28	49.28	31.65	tr|T0CR24|T0CR24_CLOSO	Uncharacterized protein OS=Paeniclostridium sordellii ATCC 9714 GN=H477_2788 PE=4 SV=1			0.309804	99	CLFSQAMKCDEK	Carbamidomethyl(C)@1; Carbamyl(M)@7; Carbamidomethyl(C)@9		missed K-C@8	0.00297377	1558.66	780.338	1558.66	780.336	2	15	1.1.1.2923.2	32.9762	251.25	242.44	32.95	0.34	9035.19
16	7.5	7.72	49.28	49.28	31.65	tr|T0CR24|T0CR24_CLOSO	Uncharacterized protein OS=Paeniclostridium sordellii ATCC 9714 GN=H477_2788 PE=4 SV=1			0.216811	99	IKGCHDMDVCK	Carbamyl@N-term; Carbamidomethyl(C)@4; Carbamidomethyl(C)@10		missed K-G@2	-0.0289598	1404.57	469.196	1404.59	469.206	3	13	1.1.1.2867.3	26.649	421.56	407.05	26.58	0.23	11474.9
16	7.5	7.72	49.28	49.28	31.65	tr|T0CR24|T0CR24_CLOSO	Uncharacterized protein OS=Paeniclostridium sordellii ATCC 9714 GN=H477_2788 PE=4 SV=1			0.111821	99	AKESMENECEADKLR	Arg-add@N-term; Carbamidomethyl(C)@9		cleaved M-A@N-term; missed K-E@2; missed K-L@13	-0.0735264	1964.83	655.951	1964.9	655.975	3	14	1.1.1.2880.3	28.1262	600.92	586.06	28.15	0.34	30472.1
16	7.5	7.72	49.28	49.28	31.65	tr|T0CR24|T0CR24_CLOSO	Uncharacterized protein OS=Paeniclostridium sordellii ATCC 9714 GN=H477_2788 PE=4 SV=1			0.0570004	98.46	KQANDLLCR	Carbamyl@N-term; Carbamidomethyl(C)@8		missed K-Q@1	-0.0399828	1159.54	580.776	1159.58	580.796	2	11	1.1.1.2884.2	28.5462	2072.44	2036.48	28.6	0.34	88725.1
16	7.5	7.72	49.28	49.28	31.65	tr|T0CR24|T0CR24_CLOSO	Uncharacterized protein OS=Paeniclostridium sordellii ATCC 9714 GN=H477_2788 PE=4 SV=1			0.0510982	99	AMNCYKVAGEK	Carbamidomethyl(C)@4; Carbamyl(K)@6		missed K-V@6	-0.016145	1312.57	657.294	1312.59	657.302	2	13	1.1.1.2875.2	27.5237	429.32	397.12	27.48	0.23	16072.1
16	7.5	7.72	49.28	49.28	31.65	tr|T0CR24|T0CR24_CLOSO	Uncharacterized protein OS=Paeniclostridium sordellii ATCC 9714 GN=H477_2788 PE=4 SV=1			0.00348833	84.66	YVCPTHKEMPK	Carbamyl@N-term; Carbamidomethyl(C)@3		missed K-E@7	-0.0447468	1431.62	478.214	1431.66	478.229	3	11	1.1.1.2870.3	26.99	432.79	429.55	26.93	0.23	19983
16	7.5	7.72	49.28	49.28	31.65	tr|T0CR24|T0CR24_CLOSO	Uncharacterized protein OS=Paeniclostridium sordellii ATCC 9714 GN=H477_2788 PE=4 SV=1			0.00305075	86.55	CLFEKAQNENEQAK	Carbamidomethyl(C)@1; Delta:H(2)C(2)(K)@5		missed K-A@5	-0.0236743	1733.78	867.898	1733.8	867.909	2	12	1.1.1.2963.4	37.5894	257.29	254.53	37.6	0.57	12633.1
16	7.5	7.72	49.28	49.28	31.65	tr|T0CR24|T0CR24_CLOSO	Uncharacterized protein OS=Paeniclostridium sordellii ATCC 9714 GN=H477_2788 PE=4 SV=1			0.000869459	56.24	KMKPSCDCEVK	Carbamyl@N-term; Carbamidomethyl(C)@6; Carbamidomethyl(C)@8		missed K-M@1	-0.0434134	1423.58	475.535	1423.63	475.549	3	9	1.1.1.2860.2	25.8196	80.37	79.54	25.81	0.27	3649.76
16	7.5	7.72	49.28	49.28	31.65	tr|T0CR24|T0CR24_CLOSO	Uncharacterized protein OS=Paeniclostridium sordellii ATCC 9714 GN=H477_2788 PE=4 SV=1			0	92.22	AGNDAEKFCEKAKCLFEK	Carbamidomethyl(C)@9; Malonyl(K)@11; Carbamidomethyl(C)@14	Malonyl(K)@53	missed K-F@7; missed K-A@11; missed K-C@13	0.0753323	2230.08	744.367	2230	744.342	3	13	1.1.1.2995.3	41.1901	225.27	196.5	41.12	0.45	11667.2
16	7.5	7.72	49.28	49.28	31.65	tr|T0CR24|T0CR24_CLOSO	Uncharacterized protein OS=Paeniclostridium sordellii ATCC 9714 GN=H477_2788 PE=4 SV=1			0	70.27	AKCLYKEAER	Carbamyl@N-term; Carbamidomethyl(C)@3; Carbamyl(K)@6		missed K-C@2; missed K-E@6	-0.0106511	1352.64	677.327	1352.65	677.333	2	10	1.1.1.2881.2	28.2054	518.48	506.68	28.27	0.34	20893.2
16	7.5	7.72	49.28	49.28	31.65	tr|T0CR24|T0CR24_CLOSO	Uncharacterized protein OS=Paeniclostridium sordellii ATCC 9714 GN=H477_2788 PE=4 SV=1			0	84.66	CLFEKAQNENEQAKCLFSQAMK	Carbamidomethyl(C)@1; Malonyl(K)@5; Carbamidomethyl(C)@15	Malonyl(K)@60	missed K-A@5; missed K-C@14	-0.103028	2759.13	920.718	2759.24	920.752	3	12	1.1.1.3028.4	44.9717	137.91	114.92	44.86	0.34	5314.26
16	7.5	7.72	49.28	49.28	31.65	tr|T0CR24|T0CR24_CLOSO	Uncharacterized protein OS=Paeniclostridium sordellii ATCC 9714 GN=H477_2788 PE=4 SV=1			0	68.64	CLFEKAQNENEQAKCLFSQAMK	Carbamidomethyl(C)@1; Delta:H(2)C(2)(K)@5; Carbamyl(K)@14; Carbamidomethyl(C)@15		missed K-A@5; missed K-C@14	0.0094727	2742.27	915.096	2742.26	915.093	3	14	1.1.1.3085.3	51.4101	239.66	237.63	51.35	0.34	12603.1
16	7.5	7.72	49.28	49.28	31.65	tr|T0CR24|T0CR24_CLOSO	Uncharacterized protein OS=Paeniclostridium sordellii ATCC 9714 GN=H477_2788 PE=4 SV=1			0	74.86	CLFSQAMKCDEK	Carbamidomethyl(C)@1; Delta:H(2)C(2)(K)@8; Carbamidomethyl(C)@9		missed K-C@8	-0.0148362	1541.65	771.834	1541.67	771.841	2	9	1.1.1.2995.4	41.2246	380.14	372.47	41.24	0.34	12896.1
16	7.5	7.72	49.28	49.28	31.65	tr|T0CR24|T0CR24_CLOSO	Uncharacterized protein OS=Paeniclostridium sordellii ATCC 9714 GN=H477_2788 PE=4 SV=1			0	97.3	KAKCLFEKAQNENEQAKCLFSQAMK	Carbamidomethyl(C)@4; Deamidated(N)@11; Carbamidomethyl(C)@18		cleaved E-K@N-term; missed K-A@1; missed K-C@3; missed K-A@8; missed K-C@17	-0.00787378	3001.44	1001.49	3001.45	1001.49	3	13	1.1.1.3043.2	46.6063	232.42	225.91	46.58	0.34	13755.1
16	7.5	7.72	49.28	49.28	31.65	tr|T0CR24|T0CR24_CLOSO	Uncharacterized protein OS=Paeniclostridium sordellii ATCC 9714 GN=H477_2788 PE=4 SV=1			0	97.3	KAKCLFEKAQNENEQAKCLFSQAMK	Carbamidomethyl(C)@4; Deamidated(N)@13; Carbamidomethyl(C)@18		cleaved E-K@N-term; missed K-A@1; missed K-C@3; missed K-A@8; missed K-C@17	-0.00787378	3001.44	1001.49	3001.45	1001.49	3	13	1.1.1.3043.2	46.6063	232.42	225.91	46.58	0.34	13755.1
16	7.5	7.72	49.28	49.28	31.65	tr|T0CR24|T0CR24_CLOSO	Uncharacterized protein OS=Paeniclostridium sordellii ATCC 9714 GN=H477_2788 PE=4 SV=1			0	34.91	KAKCLFEKAQNENEQAKCLFSQAMK	Carbamidomethyl(C)@4; Deamidated(Q)@15; Carbamidomethyl(C)@18		cleaved E-K@N-term; missed K-A@1; missed K-C@3; missed K-A@8; missed K-C@17	-0.00787378	3001.44	1001.49	3001.45	1001.49	3	13	1.1.1.3043.2	46.6063	232.42	225.91	46.58	0.34	13755.1
16	7.5	7.72	49.28	49.28	31.65	tr|T0CR24|T0CR24_CLOSO	Uncharacterized protein OS=Paeniclostridium sordellii ATCC 9714 GN=H477_2788 PE=4 SV=1			0	34.91	KAKCLFEKAQNENEQAKCLFSQAMK	Carbamidomethyl(C)@4; Deamidated(Q)@10; Carbamidomethyl(C)@18		cleaved E-K@N-term; missed K-A@1; missed K-C@3; missed K-A@8; missed K-C@17	-0.00787378	3001.44	1001.49	3001.45	1001.49	3	13	1.1.1.3043.2	46.6063	232.42	225.91	46.58	0.34	13755.1
16	7.5	7.72	49.28	49.28	31.65	tr|T0CR24|T0CR24_CLOSO	Uncharacterized protein OS=Paeniclostridium sordellii ATCC 9714 GN=H477_2788 PE=4 SV=1			0	63.51	QANDLLCR	Carbamidomethyl(C)@7			-0.0353486	988.441	495.228	988.476	495.245	2	9	1.1.1.2882.3	28.3535	635.71	626.43	28.29	0.23	49700.4
16	7.5	7.72	49.28	49.28	31.65	tr|T0CR24|T0CR24_CLOSO	Uncharacterized protein OS=Paeniclostridium sordellii ATCC 9714 GN=H477_2788 PE=4 SV=1			0	46.98	QANDLLCR	Carbamidomethyl(C)@7			-0.0353486	988.441	495.228	988.476	495.245	2	8	1.1.1.2882.2	28.319	635.71	630.97	28.29	0.23	41342.9
16	7.5	7.72	49.28	49.28	31.65	tr|T0CR24|T0CR24_CLOSO	Uncharacterized protein OS=Paeniclostridium sordellii ATCC 9714 GN=H477_2788 PE=4 SV=1			0	66.97	SEELCEKAKCLYK	Carbamidomethyl(C)@5; Malonyl(K)@7; Carbamidomethyl(C)@10	Malonyl(K)@32	missed K-A@7; missed K-C@9	-0.00263026	1742.78	872.399	1742.79	872.4	2	10	1.1.1.2928.3	33.5787	402.67	390	33.52	0.34	12784.1
17	7.18	7.32	39.18	34.29	24.9	tr|T0D415|T0D415_CLOSO	TCP-1/cpn60 chaperonin family protein OS=Paeniclostridium sordellii ATCC 9714 GN=H477_0241 PE=4 SV=1			2	99	ITNIQDILPVLEQIVQQGK				-0.0115946	2148.2	717.075	2148.22	717.079	3	20	1.1.1.3188.2	61.0367	135.01	126.78	61	0.45	4746.13
17	7.18	7.32	39.18	34.29	24.9	tr|T0D415|T0D415_CLOSO	TCP-1/cpn60 chaperonin family protein OS=Paeniclostridium sordellii ATCC 9714 GN=H477_0241 PE=4 SV=1			2	99	NVTAGSNPVLLR				-0.0201595	1239.67	620.844	1239.69	620.854	2	11	1.1.1.2906.4	31.1144	171.75	137.58	31.01	0.34	6877.84
17	7.18	7.32	39.18	34.29	24.9	tr|T0D415|T0D415_CLOSO	TCP-1/cpn60 chaperonin family protein OS=Paeniclostridium sordellii ATCC 9714 GN=H477_0241 PE=4 SV=1			1.95861	99	ESISQVASISAGDEEVGNLIAEAMEIVGK				0.0879454	2945.54	982.855	2945.45	982.825	3	15	1.1.1.3257.4	68.5961	148.59	133.67	68.49	0.91	10188.1
17	7.18	7.32	39.18	34.29	24.9	tr|T0D415|T0D415_CLOSO	TCP-1/cpn60 chaperonin family protein OS=Paeniclostridium sordellii ATCC 9714 GN=H477_0241 PE=4 SV=1			1.20761	99	KITNIQDILPVLEQIVQQGK	Carbamyl@N-term		missed K-I@1	-0.00223919	2319.31	774.112	2319.32	774.113	3	16	1.1.1.3191.4	61.4464	175.97	136.73	61.34	0.34	4756.89
17	7.18	7.32	39.18	34.29	24.9	tr|T0D415|T0D415_CLOSO	TCP-1/cpn60 chaperonin family protein OS=Paeniclostridium sordellii ATCC 9714 GN=H477_0241 PE=4 SV=1			0	73.38	SALEAGVNKLADTVKVTLGPKGR	Oxidation(N)@8; Acetylhypusine(K)@9	Oxidation(N)@20; Acetylhypusine(K)@21	missed K-L@9; missed K-V@15; missed K-G@21	0.00221966	2452.4	818.475	2452.4	818.474	3	14	1.1.1.3080.2	50.8078	280.25	256.06	50.88	0.34	10356.1
17	7.18	7.32	39.18	34.29	24.9	tr|T0D415|T0D415_CLOSO	TCP-1/cpn60 chaperonin family protein OS=Paeniclostridium sordellii ATCC 9714 GN=H477_0241 PE=4 SV=1			0	43.36	SALEAGVNKLADTVKVTLGPKGR	Oxidation(D)@12; Acetylhypusine(K)@15	Oxidation(D)@24; Acetylhypusine(K)@27	missed K-L@9; missed K-V@15; missed K-G@21	0.00221966	2452.4	818.475	2452.4	818.474	3	12	1.1.1.3080.2	50.8078	280.25	256.06	50.88	0.34	10356.1
18	6.63	6.67	17.88	17.88	12.85	tr|T2RFG7|T2RFG7_CLOSO	Uncharacterized protein OS=Paeniclostridium sordellii ATCC 9714 GN=H477_4384 PE=4 SV=1			2	99	FVPMAVEYR				-0.00765596	1110.55	556.28	1110.55	556.284	2	10	1.1.1.2932.2	33.9986	1157.8	891.65	33.86	0.34	30311.4
18	6.63	6.67	17.88	17.88	12.85	tr|T2RFG7|T2RFG7_CLOSO	Uncharacterized protein OS=Paeniclostridium sordellii ATCC 9714 GN=H477_4384 PE=4 SV=1			2	99	GFTPSNFFMAVDR				0.0220618	1487.71	744.862	1487.69	744.851	2	13	1.1.1.3041.3	46.4137	771.57	575.18	46.56	0.34	13824.1
18	6.63	6.67	17.88	17.88	12.85	tr|T2RFG7|T2RFG7_CLOSO	Uncharacterized protein OS=Paeniclostridium sordellii ATCC 9714 GN=H477_4384 PE=4 SV=1			2	99	RGFTPSNFFMAVDR			missed R-G@1	-0.0140292	1643.77	548.932	1643.79	548.937	3	14	1.1.1.3008.3	42.6664	163.58	160.24	42.7	0.34	7103.11
18	6.63	6.67	17.88	17.88	12.85	tr|T2RFG7|T2RFG7_CLOSO	Uncharacterized protein OS=Paeniclostridium sordellii ATCC 9714 GN=H477_4384 PE=4 SV=1			0.625252	88.63	NINFIECAF	Carbamidomethyl(C)@7			0.012802	1126.52	564.269	1126.51	564.263	2	8	1.1.1.3043.4	46.6753	451.69	319.35	46.81	0.34	8343.13
18	6.63	6.67	17.88	17.88	12.85	tr|T2RFG7|T2RFG7_CLOSO	Uncharacterized protein OS=Paeniclostridium sordellii ATCC 9714 GN=H477_4384 PE=4 SV=1			0	99	FVPMAVEYR				-0.00765596	1110.55	556.28	1110.55	556.284	2	9	1.1.1.2930.2	33.7715	1157.8	938.63	33.86	0.34	21006
18	6.63	6.67	17.88	17.88	12.85	tr|T2RFG7|T2RFG7_CLOSO	Uncharacterized protein OS=Paeniclostridium sordellii ATCC 9714 GN=H477_4384 PE=4 SV=1			0	92.75	FVPMAVEYR				-0.00765596	1110.55	556.28	1110.55	556.284	2	8	1.1.1.2933.2	34.1122	1157.8	458.72	33.86	0.34	14393
18	6.63	6.67	17.88	17.88	12.85	tr|T2RFG7|T2RFG7_CLOSO	Uncharacterized protein OS=Paeniclostridium sordellii ATCC 9714 GN=H477_4384 PE=4 SV=1			0	99	GFTPSNFFMAVDR				0.0220618	1487.71	744.862	1487.69	744.851	2	14	1.1.1.3044.3	46.7543	771.57	389.8	46.56	0.34	10898
18	6.63	6.67	17.88	17.88	12.85	tr|T2RFG7|T2RFG7_CLOSO	Uncharacterized protein OS=Paeniclostridium sordellii ATCC 9714 GN=H477_4384 PE=4 SV=1			0	34.91	GFTPSNFFMAVDR	Deamidated(N)@6			0.0714689	1488.74	745.378	1488.67	745.343	2	8	1.1.1.3067.4	49.4006	118.56	118.21	49.4	0.45	9063.89
18	6.63	6.67	17.88	17.88	12.85	tr|T2RFG7|T2RFG7_CLOSO	Uncharacterized protein OS=Paeniclostridium sordellii ATCC 9714 GN=H477_4384 PE=4 SV=1			0	80.22	NINFIECAF	Carbamidomethyl(C)@7			0.012802	1126.52	564.269	1126.51	564.263	2	9	1.1.1.3046.2	46.9468	451.69	380.69	46.81	0.34	13816
18	6.63	6.67	17.88	17.88	12.85	tr|T2RFG7|T2RFG7_CLOSO	Uncharacterized protein OS=Paeniclostridium sordellii ATCC 9714 GN=H477_4384 PE=4 SV=1			0	28.97	NINFIECAF	Carbamidomethyl(C)@7			0.012802	1126.52	564.269	1126.51	564.263	2	6	1.1.1.3049.4	47.3564	451.69	50.57	46.81	0.34	2821.13
19	6.46	6.51	35.64	35.64	26.73	tr|T0EEI8|T0EEI8_CLOSO	Uncharacterized protein OS=Paeniclostridium sordellii ATCC 9714 GN=H477_5698 PE=4 SV=1			2	99	ALELLSCEGIR	Carbamidomethyl(C)@7			-0.00170469	1259.65	630.834	1259.65	630.834	2	13	1.1.1.2965.2	37.7478	268.81	265.03	37.72	0.34	11737.1
19	6.46	6.51	35.64	35.64	26.73	tr|T0EEI8|T0EEI8_CLOSO	Uncharacterized protein OS=Paeniclostridium sordellii ATCC 9714 GN=H477_5698 PE=4 SV=1			2	99	IGNNMYMSCCEHGK	Deamidated(N)@4; Carbamidomethyl(C)@9; Carbamidomethyl(C)@10		cleaved M-I@N-term	-0.0536224	1700.59	567.87	1700.64	567.888	3	13	1.1.1.2878.4	27.9335	339.76	299.3	27.83	0.57	10614.2
19	6.46	6.51	35.64	35.64	26.73	tr|T0EEI8|T0EEI8_CLOSO	Uncharacterized protein OS=Paeniclostridium sordellii ATCC 9714 GN=H477_5698 PE=4 SV=1			2	99	MIGNNMYMSCCEHGK	Acetyl@N-term; Carbamidomethyl(C)@10; Carbamidomethyl(C)@11	Acetyl@1		0.049536	1872.76	937.386	1872.71	937.362	2	15	1.1.1.2935.4	34.4084	136.44	111.93	34.3	0.45	5166.19
19	6.46	6.51	35.64	35.64	26.73	tr|T0EEI8|T0EEI8_CLOSO	Uncharacterized protein OS=Paeniclostridium sordellii ATCC 9714 GN=H477_5698 PE=4 SV=1			0.29073	76.97	SLCEYGK	Carbamidomethyl(C)@3			-0.0146671	855.365	428.69	855.38	428.697	2	7	1.1.1.2867.4	26.6835	280.99	270.86	26.68	0.34	7154.13
19	6.46	6.51	35.64	35.64	26.73	tr|T0EEI8|T0EEI8_CLOSO	Uncharacterized protein OS=Paeniclostridium sordellii ATCC 9714 GN=H477_5698 PE=4 SV=1			0.16877	99	KALELLSCEGIR	Carbamyl@N-term; Carbamidomethyl(C)@8		missed K-A@1	0.0136195	1430.77	716.392	1430.76	716.385	2	12	1.1.1.2969.2	38.2021	184.52	183.86	38.17	0.45	10403.5
19	6.46	6.51	35.64	35.64	26.73	tr|T0EEI8|T0EEI8_CLOSO	Uncharacterized protein OS=Paeniclostridium sordellii ATCC 9714 GN=H477_5698 PE=4 SV=1			0.00174066	73.38	GKSLCEYGK	Carbamyl@N-term; Carbamidomethyl(C)@5		missed K-S@2	-0.0220851	1083.48	542.747	1083.5	542.758	2	9	1.1.1.2872.2	27.1828	1196.52	1176.9	27.24	0.23	52912.9
19	6.46	6.51	35.64	35.64	26.73	tr|T0EEI8|T0EEI8_CLOSO	Uncharacterized protein OS=Paeniclostridium sordellii ATCC 9714 GN=H477_5698 PE=4 SV=1			0	99	IGNNMYMSCCEHGK	Deamidated(N)@3; Carbamidomethyl(C)@9; Carbamidomethyl(C)@10		cleaved M-I@N-term	-0.0536224	1700.59	567.87	1700.64	567.888	3	14	1.1.1.2878.4	27.9335	339.76	299.3	27.83	0.57	10614.2
19	6.46	6.51	35.64	35.64	26.73	tr|T0EEI8|T0EEI8_CLOSO	Uncharacterized protein OS=Paeniclostridium sordellii ATCC 9714 GN=H477_5698 PE=4 SV=1			0	99	IGNNMYMSCCEHGK	Carbamidomethyl(C)@9; Carbamidomethyl(C)@10		cleaved M-I@N-term	-0.0728783	1699.58	567.535	1699.66	567.56	3	13	1.1.1.2875.3	27.5582	316.41	253.29	27.48	0.23	11914.5
19	6.46	6.51	35.64	35.64	26.73	tr|T0EEI8|T0EEI8_CLOSO	Uncharacterized protein OS=Paeniclostridium sordellii ATCC 9714 GN=H477_5698 PE=4 SV=1			0	99	MIGNNMYMSCCEHGK	Deamidated(N)@5; Carbamidomethyl(C)@10; Carbamidomethyl(C)@11			-0.0263078	1831.66	611.559	1831.68	611.568	3	15	1.1.1.2892.4	29.524	284.43	282.48	29.52	0.34	14840.1
20	6.07	6.08	24.21	20.24	20.24	tr|T0D2M7|T0D2M7_CLOSO	Putative peptidoglycan binding domain protein OS=Paeniclostridium sordellii ATCC 9714 GN=H477_0372 PE=4 SV=1			2	99	APVVSGVPVSFPGEVLQIGSK				0.07321	2066.22	1034.12	2066.14	1034.08	2	14	1.1.1.3036.4	45.8804	117.18	97.65	45.77	0.8	5579.13
20	6.07	6.08	24.21	20.24	20.24	tr|T0D2M7|T0D2M7_CLOSO	Putative peptidoglycan binding domain protein OS=Paeniclostridium sordellii ATCC 9714 GN=H477_0372 PE=4 SV=1			2	99	NVFDTISVVVDEIFNTFIK				0.0727552	2199.22	734.08	2199.15	734.056	3	14	1.1.1.3438.2	73.4028	152	102.02	73.21	0.33	1446.13
20	6.07	6.08	24.21	20.24	20.24	tr|T0D2M7|T0D2M7_CLOSO	Putative peptidoglycan binding domain protein OS=Paeniclostridium sordellii ATCC 9714 GN=H477_0372 PE=4 SV=1			2	99	SFYGEGIVFEK				0.00803394	1274.63	638.32	1274.62	638.316	2	10	1.1.1.2971.2	38.4294	289.29	285.38	38.4	0.34	13980.3
20	6.07	6.08	24.21	20.24	20.24	tr|T0D2M7|T0D2M7_CLOSO	Putative peptidoglycan binding domain protein OS=Paeniclostridium sordellii ATCC 9714 GN=H477_0372 PE=4 SV=1			0.0731433	46.06	EFQGIFGLPK				-0.018927	1134.59	568.302	1134.61	568.311	2	8	1.1.1.3007.3	42.5528	160.24	150.28	42.6	0.45	12629.1
20	6.07	6.08	24.21	20.24	20.24	tr|T0D2M7|T0D2M7_CLOSO	Putative peptidoglycan binding domain protein OS=Paeniclostridium sordellii ATCC 9714 GN=H477_0372 PE=4 SV=1			0	95.25	NVFDTISVVVDEIFNTFIK				0.0727552	2199.22	734.08	2199.15	734.056	3	10	1.1.1.3408.2	73.0695	152	93.54	73.21	0.33	1410.13
21	6	6	15.69	15.69	15.69	tr|T2RDU1|T2RDU1_CLOSO	ATP synthase subunit beta, sodium ion specific OS=Paeniclostridium sordellii ATCC 9714 GN=atpD PE=4 SV=1			2	99	DQEGQDVLLFVDNIFR				-0.067552	1906.88	954.445	1906.94	954.479	2	16	1.1.1.3196.4	62.0141	255.35	250.95	62.03	0.45	5680.31
21	6	6	15.69	15.69	15.69	tr|T2RDU1|T2RDU1_CLOSO	ATP synthase subunit beta, sodium ion specific OS=Paeniclostridium sordellii ATCC 9714 GN=atpD PE=4 SV=1			2	99	FTQAGSEVSALLGR				0.0110097	1434.76	718.386	1434.75	718.381	2	14	1.1.1.2972.4	38.612	145.33	144.07	38.52	0.34	11507.3
21	6	6	15.69	15.69	15.69	tr|T2RDU1|T2RDU1_CLOSO	ATP synthase subunit beta, sodium ion specific OS=Paeniclostridium sordellii ATCC 9714 GN=atpD PE=4 SV=1			2	99	VALTGLTMAEYFR				0.0277913	1470.78	736.398	1470.75	736.384	2	17	1.1.1.3040.2	46.2657	242.76	242.09	46.24	0.34	10227.2
21	6	6	15.69	15.69	15.69	tr|T2RDU1|T2RDU1_CLOSO	ATP synthase subunit beta, sodium ion specific OS=Paeniclostridium sordellii ATCC 9714 GN=atpD PE=4 SV=1			0	99	VALTGLTMAEYFR				0.0277913	1470.78	736.398	1470.75	736.384	2	16	1.1.1.3039.4	46.2212	242.76	237.13	46.24	0.34	8315.19
22	6	6	13.1	13.1	13.1	tr|T0EB97|T0EB97_CLOSO	CO dehydrogenase/acetyl-CoA synthase complex beta subunit OS=Paeniclostridium sordellii ATCC 9714 GN=H477_0479 PE=4 SV=1			2	99	LPLAVIVDIAGK				-0.00362573	1207.75	604.882	1207.75	604.884	2	16	1.1.1.3051.2	47.5145	144.73	132.9	47.59	0.45	7043.07
22	6	6	13.1	13.1	13.1	tr|T0EB97|T0EB97_CLOSO	CO dehydrogenase/acetyl-CoA synthase complex beta subunit OS=Paeniclostridium sordellii ATCC 9714 GN=H477_0479 PE=4 SV=1			2	99	LPLAVIVDIAGKNMQEDFEPVLER	Carbamyl(K)@12		missed K-N@12	-0.0157941	2738.42	913.812	2738.43	913.818	3	19	1.1.1.3214.4	64.059	129.91	129.34	64.07	0.91	4221.19
22	6	6	13.1	13.1	13.1	tr|T0EB97|T0EB97_CLOSO	CO dehydrogenase/acetyl-CoA synthase complex beta subunit OS=Paeniclostridium sordellii ATCC 9714 GN=H477_0479 PE=4 SV=1			2	99	VIPLGYDVTSVIHVVSVAVR				0.022467	2122.24	708.42	2122.22	708.412	3	12	1.1.1.3177.4	59.8568	124.98	123.06	59.87	0.45	3478.13
23	6	6	24.58	24.58	24.58	tr|T0CQV5|T0CQV5_CLOSO	30S ribosomal protein S2 OS=Paeniclostridium sordellii ATCC 9714 GN=rpsB PE=3 SV=1			2	99	DMPELPAAIFVVDPR				0.0348961	1668.89	835.452	1668.85	835.435	2	12	1.1.1.3077.2	50.4671	200.12	176.84	50.55	0.57	7018.13
23	6	6	24.58	24.58	24.58	tr|T0CQV5|T0CQV5_CLOSO	30S ribosomal protein S2 OS=Paeniclostridium sordellii ATCC 9714 GN=rpsB PE=3 SV=1			2	99	LGIPVIGIVDTNCDPEQLDFAIPGNDDAIR	Carbamidomethyl(C)@13			0.0917623	3236.69	1079.9	3236.6	1079.87	3	16	1.1.1.3097.4	52.8071	218.1	111.84	52.58	0.45	6721.13
23	6	6	24.58	24.58	24.58	tr|T0CQV5|T0CQV5_CLOSO	30S ribosomal protein S2 OS=Paeniclostridium sordellii ATCC 9714 GN=rpsB PE=3 SV=1			2	99	LITGAMATAIIEGR				-0.0415861	1415.74	708.877	1415.78	708.898	2	15	1.1.1.3001.3	41.8713	215.09	203.06	41.81	0.34	10463.1
23	6	6	24.58	24.58	24.58	tr|T0CQV5|T0CQV5_CLOSO	30S ribosomal protein S2 OS=Paeniclostridium sordellii ATCC 9714 GN=rpsB PE=3 SV=1			0	94.9	DMPELPAAIFVVDPR				0.0348961	1668.89	835.452	1668.85	835.435	2	9	1.1.1.3080.4	50.8768	200.12	90.16	50.55	0.57	4770.07
24	6	6	14.2	14.2	14.2	tr|T0CM84|T0CM84_CLOSO	Tryptophanase 2 OS=Paeniclostridium sordellii ATCC 9714 GN=tnaA2 PE=4 SV=1			2	99	DLEALAVGLYEGIDYDYLR				0.0175662	2187.09	1094.55	2187.07	1094.54	2	20	1.1.1.3190.3	61.2983	356.24	337.04	61.34	0.45	15419.9
24	6	6	14.2	14.2	14.2	tr|T0CM84|T0CM84_CLOSO	Tryptophanase 2 OS=Paeniclostridium sordellii ATCC 9714 GN=tnaA2 PE=4 SV=1			2	99	IGQMEYIANR				-0.00145623	1193.58	597.8	1193.59	597.8	2	13	1.1.1.2895.4	29.8648	102.64	102.35	29.86	0.34	8368.13
24	6	6	14.2	14.2	14.2	tr|T0CM84|T0CM84_CLOSO	Tryptophanase 2 OS=Paeniclostridium sordellii ATCC 9714 GN=tnaA2 PE=4 SV=1			2	99	TISFEGFVSYGGLAGR				0.0214427	1659.85	830.931	1659.83	830.92	2	16	1.1.1.3033.4	45.5397	119.43	119.27	45.44	1.59	6916.12
25	5.92	6	24.31	24.31	24.31	tr|T2RGS3|T2RGS3_CLOSO	Uncharacterized protein OS=Paeniclostridium sordellii ATCC 9714 GN=H477_3966 PE=4 SV=1			2	99	FFFYPCEIDLYNNLK	Carbamidomethyl(C)@6			0.0661371	1981.99	992.005	1981.93	991.971	2	15	1.1.1.3086.3	51.5236	254.16	245.76	51.46	0.57	15261.1
25	5.92	6	24.31	24.31	24.31	tr|T2RGS3|T2RGS3_CLOSO	Uncharacterized protein OS=Paeniclostridium sordellii ATCC 9714 GN=H477_3966 PE=4 SV=1			2	99	LSAIDYVDFGK				0.00776389	1226.63	614.32	1226.62	614.316	2	12	1.1.1.2974.2	38.7701	183.01	172.92	38.73	0.23	11194.1
25	5.92	6	24.31	24.31	24.31	tr|T2RGS3|T2RGS3_CLOSO	Uncharacterized protein OS=Paeniclostridium sordellii ATCC 9714 GN=H477_3966 PE=4 SV=1			1.92082	99	LSCSDCILR	Carbamidomethyl(C)@3; Carbamidomethyl(C)@6			-0.00398463	1122.51	562.263	1122.52	562.265	2	10	1.1.1.2893.4	29.6376	348.09	347.91	29.63	0.34	14710.1
25	5.92	6	24.31	24.31	24.31	tr|T2RGS3|T2RGS3_CLOSO	Uncharacterized protein OS=Paeniclostridium sordellii ATCC 9714 GN=H477_3966 PE=4 SV=1			0	98.46	FFFYPCEIDLYNNLK	Carbamidomethyl(C)@6			0.0661371	1981.99	992.005	1981.93	991.971	2	10	1.1.1.3087.4	51.6717	254.16	155.31	51.46	0.57	8338.66
26	5.59	5.68	19.28	19.28	19.28	tr|T0CTM7|T0CTM7_CLOSO	Peptidase M20/M25/M40 family protein OS=Paeniclostridium sordellii ATCC 9714 GN=H477_0436 PE=4 SV=1			2	99	MNNVLSDLQPSLVFKYFEEISQIPR	Carbamyl(K)@15		missed K-Y@15	-0.0315238	3009.49	1004.17	3009.53	1004.18	3	20	1.1.1.3252.2	67.9597	403.39	393.63	68.02	0.34	16533.1
26	5.59	5.68	19.28	19.28	19.28	tr|T0CTM7|T0CTM7_CLOSO	Peptidase M20/M25/M40 family protein OS=Paeniclostridium sordellii ATCC 9714 GN=H477_0436 PE=4 SV=1			2	99	YFEEISQIPR				0.0117349	1280.65	641.333	1280.64	641.327	2	13	1.1.1.2940.4	34.9764	311.99	308.61	34.99	0.23	14351.1
26	5.59	5.68	19.28	19.28	19.28	tr|T0CTM7|T0CTM7_CLOSO	Peptidase M20/M25/M40 family protein OS=Paeniclostridium sordellii ATCC 9714 GN=H477_0436 PE=4 SV=1			1.58503	99	AISDYLR				-0.00795399	836.431	419.223	836.439	419.227	2	9	1.1.1.2914.4	32.0231	219.48	219.31	32.02	0.34	5467.13
27	4.71	4.75	16.06	16.06	12.45	tr|T0CXE2|T0CXE2_CLOSO	Metallopeptidase M24 family protein OS=Paeniclostridium sordellii ATCC 9714 GN=H477_5622 PE=4 SV=1			2	99	FVNSSYIVDTLR				-0.00344067	1412.73	707.37	1412.73	707.372	2	12	1.1.1.2975.4	38.9527	115.08	114.55	38.95	0.34	7946.07
27	4.71	4.75	16.06	16.06	12.45	tr|T0CXE2|T0CXE2_CLOSO	Metallopeptidase M24 family protein OS=Paeniclostridium sordellii ATCC 9714 GN=H477_5622 PE=4 SV=1			2	99	IEDLVLVTK				-0.0137692	1028.6	515.306	1028.61	515.313	2	12	1.1.1.2940.2	34.9074	325.55	320.1	34.88	0.34	11670
27	4.71	4.75	16.06	16.06	12.45	tr|T0CXE2|T0CXE2_CLOSO	Metallopeptidase M24 family protein OS=Paeniclostridium sordellii ATCC 9714 GN=H477_5622 PE=4 SV=1			0.694649	94.33	FCDIDAAAR	Carbamidomethyl(C)@2			-0.0149529	1037.45	519.73	1037.46	519.737	2	9	1.1.1.2880.4	28.1608	227.96	200.85	28.06	0.23	11470.1
27	4.71	4.75	16.06	16.06	12.45	tr|T0CXE2|T0CXE2_CLOSO	Metallopeptidase M24 family protein OS=Paeniclostridium sordellii ATCC 9714 GN=H477_5622 PE=4 SV=1			0.0141246	98.75	AIALVKPGVR	Carbamyl(K)@6			-0.0302354	1065.64	533.825	1065.67	533.84	2	11	1.1.1.2916.2	32.1813	424.73	424.37	32.25	0.34	17851.1
28	4.65	4.7	14.83	14.83	12.07	tr|T0D3J0|T0D3J0_CLOSO	Pyruvate formate lyase family protein OS=Paeniclostridium sordellii ATCC 9714 GN=H477_0509 PE=4 SV=1			2	99	DLAAGVLTEEEAQEIMDHFVMK				0.0599192	2475.23	826.083	2475.17	826.063	3	12	1.1.1.3137.2	56.6249	101.69	98.03	56.61	0.99	3541.95
28	4.65	4.7	14.83	14.83	12.07	tr|T0D3J0|T0D3J0_CLOSO	Pyruvate formate lyase family protein OS=Paeniclostridium sordellii ATCC 9714 GN=H477_0509 PE=4 SV=1			2	99	VSTFLDIYFER				0.026488	1388.72	695.369	1388.7	695.356	2	11	1.1.1.3059.3	48.4576	131.72	108.41	48.38	0.45	5405.07
28	4.65	4.7	14.83	14.83	12.07	tr|T0D3J0|T0D3J0_CLOSO	Pyruvate formate lyase family protein OS=Paeniclostridium sordellii ATCC 9714 GN=H477_0509 PE=4 SV=1			0.651695	93	VALYGVDK				0.00726804	863.482	432.748	863.475	432.745	2	9	1.1.1.2888.4	29.0695	355.99	65.43	29.52	0.34	6694
28	4.65	4.7	14.83	14.83	12.07	tr|T0D3J0|T0D3J0_CLOSO	Pyruvate formate lyase family protein OS=Paeniclostridium sordellii ATCC 9714 GN=H477_0509 PE=4 SV=1			0.00217692	95.88	DLAAGVLTEEEAQEIMDHFVMKLR	Carbamyl(M)@16		missed K-L@22	-0.0438959	2787.31	930.112	2787.36	930.126	3	13	1.1.1.3218.3	64.4788	235.4	228.49	64.41	0.68	11170
29	4.61	4.64	53.62	53.62	53.62	tr|T0DR76|T0DR76_CLOSO	Manganese containing catalase family protein OS=Paeniclostridium sordellii ATCC 9714 GN=H477_3486 PE=4 SV=1			2	99	ALATYYQLVNLTDDVDIK				0.0529223	2054.11	1028.06	2054.06	1028.04	2	18	1.1.1.3056.3	48.1169	226.25	225.9	48.06	0.34	11554.1
29	4.61	4.64	53.62	53.62	53.62	tr|T0DR76|T0DR76_CLOSO	Manganese containing catalase family protein OS=Paeniclostridium sordellii ATCC 9714 GN=H477_3486 PE=4 SV=1			2	99	FGEALMDVYDYQEQK				0.0501985	1834.86	918.437	1834.81	918.411	2	17	1.1.1.2986.2	40.1335	269.56	265.21	40.11	0.34	19435.3
29	4.61	4.64	53.62	53.62	53.62	tr|T0DR76|T0DR76_CLOSO	Manganese containing catalase family protein OS=Paeniclostridium sordellii ATCC 9714 GN=H477_3486 PE=4 SV=1			0.610834	99	ALATYYQLVNLTDDVDIKNVLR	Carbamyl(K)@18		missed K-N@18	0.0977485	2579.46	860.826	2579.36	860.794	3	17	1.1.1.3114.2	54.6683	277.98	181.62	54.51	0.34	5174.13
29	4.61	4.64	53.62	53.62	53.62	tr|T0DR76|T0DR76_CLOSO	Manganese containing catalase family protein OS=Paeniclostridium sordellii ATCC 9714 GN=H477_3486 PE=4 SV=1			0	99	ALATYYQLVNLTDDVDIKNVLR	Carbamyl(K)@18		missed K-N@18	0.0977485	2579.46	860.826	2579.36	860.794	3	17	1.1.1.3111.3	54.3622	277.98	233.22	54.51	0.34	6052.14
29	4.61	4.64	53.62	53.62	53.62	tr|T0DR76|T0DR76_CLOSO	Manganese containing catalase family protein OS=Paeniclostridium sordellii ATCC 9714 GN=H477_3486 PE=4 SV=1			0	83.63	FGEALMDVYDYQEQK	Deamidated(Q)@12; Succinyl(K)@15	Succinyl(K)@66		0.106571	1935.92	646.312	1935.81	646.277	3	12	1.1.1.3055.3	48.0033	382.53	334.7	48.06	0.34	14684
29	4.61	4.64	53.62	53.62	53.62	tr|T0DR76|T0DR76_CLOSO	Manganese containing catalase family protein OS=Paeniclostridium sordellii ATCC 9714 GN=H477_3486 PE=4 SV=1			0	83.63	FGEALMDVYDYQEQK	Deamidated(Q)@14; Succinyl(K)@15	Succinyl(K)@66		0.106571	1935.92	646.312	1935.81	646.277	3	12	1.1.1.3055.3	48.0033	382.53	334.7	48.06	0.34	14684
30	4.47	4.5	55.93	50.85	44.92	tr|T0DWI1|T0DWI1_CLOSO	Manganese containing catalase family protein OS=Paeniclostridium sordellii ATCC 9714 GN=H477_3485 PE=4 SV=1			2	99	ALLTDIGTEELAHVEMIASMVYQLTK				0.103949	2875.57	959.532	2875.47	959.498	3	20	1.1.1.3261.2	68.9806	298.67	295.36	69.04	0.34	30338.4
30	4.47	4.5	55.93	50.85	44.92	tr|T0DWI1|T0DWI1_CLOSO	Manganese containing catalase family protein OS=Paeniclostridium sordellii ATCC 9714 GN=H477_3485 PE=4 SV=1			2	99	FLITQFGGPNGELAAAVR	Deamidated(N)@10			0.0320474	1861.01	931.51	1860.97	931.494	2	20	1.1.1.3021.2	44.108	357.73	311.87	44.19	0.45	12597.1
30	4.47	4.5	55.93	50.85	44.92	tr|T0DWI1|T0DWI1_CLOSO	Manganese containing catalase family protein OS=Paeniclostridium sordellii ATCC 9714 GN=H477_3485 PE=4 SV=1			0.405607	86.1	FTMPTGK				-0.00141807	780.383	391.199	780.384	391.199	2	8	1.1.1.2885.2	28.6598	309.12	301.29	28.63	0.23	16232
30	4.47	4.5	55.93	50.85	44.92	tr|T0DWI1|T0DWI1_CLOSO	Manganese containing catalase family protein OS=Paeniclostridium sordellii ATCC 9714 GN=H477_3485 PE=4 SV=1			0.0565055	35.71	MWIYQK				-0.00654269	867.425	434.72	867.431	434.723	2	7	1.1.1.2917.3	32.3294	374.02	335.78	32.38	0.23	8363.07
30	4.47	4.5	55.93	50.85	44.92	tr|T0DWI1|T0DWI1_CLOSO	Manganese containing catalase family protein OS=Paeniclostridium sordellii ATCC 9714 GN=H477_3485 PE=4 SV=1			0.00480371	95.88	TLEHPVNLK	Delta:H(2)C(2)(H)@4; Deamidated(N)@7			-0.0188724	1076.57	539.291	1076.59	539.301	2	11	1.1.1.2931.4	33.954	235.34	218.44	33.85	0.34	10299.1
30	4.47	4.5	55.93	50.85	44.92	tr|T0DWI1|T0DWI1_CLOSO	Manganese containing catalase family protein OS=Paeniclostridium sordellii ATCC 9714 GN=H477_3485 PE=4 SV=1			0	99	ALLTDIGTEELAHVEMIASMVYQLTK	Dethiomethyl(M)@16			0.102618	2827.57	943.531	2827.47	943.497	3	16	1.1.1.3258.4	68.7095	158.69	158.47	68.71	0.57	9759.08
30	4.47	4.5	55.93	50.85	44.92	tr|T0DWI1|T0DWI1_CLOSO	Manganese containing catalase family protein OS=Paeniclostridium sordellii ATCC 9714 GN=H477_3485 PE=4 SV=1			0	99	FLITQFGGPNGELAAAVR	Deamidated(N)@10			0.0320474	1861.01	931.51	1860.97	931.494	2	16	1.1.1.3023.3	44.3695	357.73	259.3	44.19	0.45	14033.1
31	4.31	4.34	17.95	17.95	17.95	tr|T0CLP4|T0CLP4_CLOSO	Uncharacterized protein OS=Paeniclostridium sordellii ATCC 9714 GN=H477_3325 PE=4 SV=1			2	99	LLIGTLDHGITMEPVLEICIK	Carbamidomethyl(C)@19			0.0477026	2364.33	789.116	2364.28	789.101	3	19	1.1.1.3081.2	50.9214	256.14	205.25	51.01	0.34	6989.08
31	4.31	4.34	17.95	17.95	17.95	tr|T0CLP4|T0CLP4_CLOSO	Uncharacterized protein OS=Paeniclostridium sordellii ATCC 9714 GN=H477_3325 PE=4 SV=1			2	99	VSPEEIIEQLEITIK				0.0204728	1739.98	870.995	1739.96	870.985	2	16	1.1.1.3177.2	59.7878	526.88	478.13	59.74	0.34	11665.2
31	4.31	4.34	17.95	17.95	17.95	tr|T0CLP4|T0CLP4_CLOSO	Uncharacterized protein OS=Paeniclostridium sordellii ATCC 9714 GN=H477_3325 PE=4 SV=1			0.305395	99	VSPEEIIEQLEITIKK	Carbamyl(K)@15		missed K-K@15	0.00976088	1911.07	638.029	1911.06	638.026	3	16	1.1.1.3184.3	60.617	228.52	228.42	60.55	0.45	7086.13
31	4.31	4.34	17.95	17.95	17.95	tr|T0CLP4|T0CLP4_CLOSO	Uncharacterized protein OS=Paeniclostridium sordellii ATCC 9714 GN=H477_3325 PE=4 SV=1			0.00524306	97.3	GIKVSPEEIIEQLEITIKK	Carbamyl(K)@3		missed K-V@3; missed K-K@18	0.056961	2209.31	737.445	2209.26	737.426	3	13	1.1.1.3165.3	58.4599	112.33	105.42	58.51	0.45	4426.07
31	4.31	4.34	17.95	17.95	17.95	tr|T0CLP4|T0CLP4_CLOSO	Uncharacterized protein OS=Paeniclostridium sordellii ATCC 9714 GN=H477_3325 PE=4 SV=1			0.00305075	99	VSPEEIIEQLEITIKKLK	Malonyl(K)@15	Malonyl(K)@137	missed K-K@15; missed K-L@16	0.011075	2195.24	732.754	2195.23	732.751	3	19	1.1.1.3259.2	68.7539	227.85	208.41	68.71	0.23	12063.1
31	4.31	4.34	17.95	17.95	17.95	tr|T0CLP4|T0CLP4_CLOSO	Uncharacterized protein OS=Paeniclostridium sordellii ATCC 9714 GN=H477_3325 PE=4 SV=1			0	99	VSPEEIIEQLEITIK				0.0204728	1739.98	870.995	1739.96	870.985	2	14	1.1.1.3174.2	59.4472	526.88	238.31	59.74	0.34	4224.89
31	4.31	4.34	17.95	17.95	17.95	tr|T0CLP4|T0CLP4_CLOSO	Uncharacterized protein OS=Paeniclostridium sordellii ATCC 9714 GN=H477_3325 PE=4 SV=1			0	99	VSPEEIIEQLEITIKK			missed K-K@15	0.0443585	1868.1	623.706	1868.05	623.691	3	14	1.1.1.3119.3	55.2704	143.05	134.93	55.2	0.65	3937.12
31	4.31	4.34	17.95	17.95	17.95	tr|T0CLP4|T0CLP4_CLOSO	Uncharacterized protein OS=Paeniclostridium sordellii ATCC 9714 GN=H477_3325 PE=4 SV=1			0	99	VSPEEIIEQLEITIKK	Carbamyl(K)@15		missed K-K@15	0.00976088	1911.07	638.029	1911.06	638.026	3	14	1.1.1.3181.4	60.3108	228.52	142.74	60.55	0.45	5057.89
32	4.1	4.22	10.54	10.54	7.831	tr|T0D119|T0D119_CLOSO	Thiamine pyrophosphate enzyme, C-terminal TPP binding domain protein OS=Paeniclostridium sordellii ATCC 9714 GN=H477_1149 PE=4 SV=1			2	99	VLEVLANAHEIENAEIKALVAEIEAR	Carbamyl(K)@17		missed K-A@17	-0.00260432	2886.54	963.188	2886.55	963.189	3	20	1.1.1.3171.3	59.1411	191.17	136.7	58.96	0.34	7183.13
32	4.1	4.22	10.54	10.54	7.831	tr|T0D119|T0D119_CLOSO	Thiamine pyrophosphate enzyme, C-terminal TPP binding domain protein OS=Paeniclostridium sordellii ATCC 9714 GN=H477_1149 PE=4 SV=1			1.56864	99	ALVAEIEAR				-0.0253698	970.519	486.267	970.545	486.28	2	10	1.1.1.2906.3	31.0799	188.96	185.16	31.11	0.34	7550.89
32	4.1	4.22	10.54	10.54	7.831	tr|T0D119|T0D119_CLOSO	Thiamine pyrophosphate enzyme, C-terminal TPP binding domain protein OS=Paeniclostridium sordellii ATCC 9714 GN=H477_1149 PE=4 SV=1			0.534617	91.36	LVTQLFGDR				-0.00795816	1047.56	524.789	1047.57	524.793	2	8	1.1.1.2947.3	35.7372	375.53	338.64	35.79	0.34	13710
32	4.1	4.22	10.54	10.54	7.831	tr|T0D119|T0D119_CLOSO	Thiamine pyrophosphate enzyme, C-terminal TPP binding domain protein OS=Paeniclostridium sordellii ATCC 9714 GN=H477_1149 PE=4 SV=1			0	87.42	LVTQLFGDR				-0.00795816	1047.56	524.789	1047.57	524.793	2	8	1.1.1.2950.4	36.1123	375.53	95.83	35.79	0.34	4975.07
33	4.1	4.11	44.21	35.79	21.05	tr|T0EB82|T0EB82_CLOSO	Prismane/CO dehydrogenase family protein OS=Paeniclostridium sordellii ATCC 9714 GN=H477_0454 PE=4 SV=1			2	99	ITPKTPLGLCGADEHVIVGR	Carbamyl(K)@4; Carbamidomethyl(C)@10		missed K-T@4	0.0287948	2175.18	726.066	2175.15	726.056	3	18	1.1.1.2952.4	36.3396	320.07	319.77	36.33	0.34	16614.1
33	4.1	4.11	44.21	35.79	21.05	tr|T0EB82|T0EB82_CLOSO	Prismane/CO dehydrogenase family protein OS=Paeniclostridium sordellii ATCC 9714 GN=H477_0454 PE=4 SV=1			2	99	TPLGLCGADEHVIVGR	Carbamidomethyl(C)@6			-0.00873772	1692.85	565.292	1692.86	565.294	3	18	1.1.1.2925.3	33.2379	168.54	167.13	33.18	0.34	14274.9
33	4.1	4.11	44.21	35.79	21.05	tr|T0EB82|T0EB82_CLOSO	Prismane/CO dehydrogenase family protein OS=Paeniclostridium sordellii ATCC 9714 GN=H477_0454 PE=4 SV=1			0.0958256	49.74	ICAAGPCR	Carbamidomethyl(C)@2; Carbamidomethyl(C)@7			-0.0227023	903.383	452.699	903.406	452.71	2	7	1.1.1.2861.4	26.0019	31.86	29.7	25.9	0.34	1955.13
33	4.1	4.11	44.21	35.79	21.05	tr|T0EB82|T0EB82_CLOSO	Prismane/CO dehydrogenase family protein OS=Paeniclostridium sordellii ATCC 9714 GN=H477_0454 PE=4 SV=1			0	65.26	MVAAGTAAHQTMLE	Dehydrated(T)@11; Dehydrated(E)@14	Dehydrated(T)@91	cleaved E-V@C-term	-0.056811	1393.59	465.538	1393.65	465.557	3	10	1.1.1.2832.2	25.146	58.19	46.29	25.19	0.09	1879.13
34	4	4	8.434	8.434	6.928	tr|T2RCI7|T2RCI7_CLOSO	Multiple substrate aminotransferase OS=Paeniclostridium sordellii ATCC 9714 GN=H477_5144 PE=4 SV=1			2	99	FEGEILPSLK				0.00179374	1131.62	566.817	1131.62	566.816	2	13	1.1.1.2962.3	37.4413	158.8	153.63	37.38	0.34	7762.01
34	4	4	8.434	8.434	6.928	tr|T2RCI7|T2RCI7_CLOSO	Multiple substrate aminotransferase OS=Paeniclostridium sordellii ATCC 9714 GN=H477_5144 PE=4 SV=1			2	99	IGWVCASPEILSK	Carbamidomethyl(C)@5			0.0205859	1458.77	730.395	1458.75	730.384	2	13	1.1.1.2979.4	39.4072	104.61	83.87	39.3	0.45	5679.07
34	4	4	8.434	8.434	6.928	tr|T2RCI7|T2RCI7_CLOSO	Multiple substrate aminotransferase OS=Paeniclostridium sordellii ATCC 9714 GN=H477_5144 PE=4 SV=1			0	54.38	IGWVCASPEILSKFVFVK	Carbamidomethyl(C)@5; Carbamyl(K)@13		missed K-F@13	0.077118	2122.21	708.409	2122.13	708.383	3	11	1.1.1.3166.3	58.5734	88.37	83.65	58.62	0.45	3225.01
35	4	4	16.29	16.29	16.29	tr|T2RFA8|T2RFA8_CLOSO	Carbamoyl-phosphate synthase L chain, ATP binding domain protein OS=Paeniclostridium sordellii ATCC 9714 GN=H477_4284 PE=4 SV=1			2	99	ALDEIIIEGITSNIEFQR				0.0380427	2060.12	687.713	2060.08	687.7	3	18	1.1.1.3103.3	53.454	193	190.05	53.49	0.34	5957.01
35	4	4	16.29	16.29	16.29	tr|T2RFA8|T2RFA8_CLOSO	Carbamoyl-phosphate synthase L chain, ATP binding domain protein OS=Paeniclostridium sordellii ATCC 9714 GN=H477_4284 PE=4 SV=1			2	99	IQVEHPITEMITGIDLIK				0.00400525	2049.12	684.048	2049.12	684.047	3	18	1.1.1.3062.2	48.7638	152.69	140.44	48.72	0.34	8531.13
36	4	4	14	14	14	tr|T2RCT6|T2RCT6_CLOSO	M42 glutamyl aminopeptidase family protein OS=Paeniclostridium sordellii ATCC 9714 GN=H477_4964 PE=4 SV=1			2	99	AGIAAILEALR				0.0146962	1096.68	549.345	1096.66	549.338	2	13	1.1.1.3093.2	52.284	146.65	136.76	52.25	0.23	5138.13
36	4	4	14	14	14	tr|T2RCT6|T2RCT6_CLOSO	M42 glutamyl aminopeptidase family protein OS=Paeniclostridium sordellii ATCC 9714 GN=H477_4964 PE=4 SV=1			2	99	LIDEFIELVK				-0.012474	1217.68	609.846	1217.69	609.853	2	14	1.1.1.3050.2	47.401	180.49	168.84	47.47	0.34	7860.13
37	4	4	29.85	29.85	29.85	tr|T0EC29|T0EC29_CLOSO	Putative ferredoxin/flavodoxin oxidoreductase,beta subunit OS=Paeniclostridium sordellii ATCC 9714 GN=H477_0138 PE=4 SV=1			2	99	DINVQGAPIR				-0.0299131	1081.56	541.786	1081.59	541.801	2	10	1.1.1.2890.4	29.2967	221.68	180.19	29.19	0.23	8976.13
37	4	4	29.85	29.85	29.85	tr|T0EC29|T0EC29_CLOSO	Putative ferredoxin/flavodoxin oxidoreductase,beta subunit OS=Paeniclostridium sordellii ATCC 9714 GN=H477_0138 PE=4 SV=1			2	99	MAEMLGTLDR				-0.00651156	1135.53	568.772	1135.54	568.776	2	10	1.1.1.2933.4	34.1812	147.73	115.95	34.07	0.45	6970.13
38	4	4	26.47	26.47	26.47	tr|T0E6D8|T0E6D8_CLOSO	Uncharacterized protein OS=Paeniclostridium sordellii ATCC 9714 GN=H477_1876 PE=4 SV=1			2	99	IFTIAAVGNLNDLELMLIEDDIDEIPSTK				-0.0778786	3201.56	1068.19	3201.64	1068.22	3	22	1.1.1.3212.4	63.832	225.36	223.23	63.84	0.45	7642.13
38	4	4	26.47	26.47	26.47	tr|T0E6D8|T0E6D8_CLOSO	Uncharacterized protein OS=Paeniclostridium sordellii ATCC 9714 GN=H477_1876 PE=4 SV=1			2	99	VFHASPNAPGVDVYIDNVLTLSDLK				0.0726426	2683.46	895.493	2683.39	895.469	3	23	1.1.1.3094.2	52.3975	379.71	372.41	52.46	0.34	13948.2
39	4	4	69.35	69.35	69.35	tr|T0CFK2|T0CFK2_CLOSO	Putative membrane protein OS=Paeniclostridium sordellii ATCC 9714 GN=H477_2616 PE=4 SV=1			2	99	GMVPIVLGAAVTTAGLALDAK				0.0260609	1967.14	656.72	1967.11	656.711	3	15	1.1.1.3174.4	59.5162	100.17	93.88	59.63	0.45	2704.12
39	4	4	69.35	69.35	69.35	tr|T0CFK2|T0CFK2_CLOSO	Putative membrane protein OS=Paeniclostridium sordellii ATCC 9714 GN=H477_2616 PE=4 SV=1			2	99	NMAGALLVGAGVAHIALGSIDR				0.069203	2105.21	702.744	2105.14	702.721	3	15	1.1.1.3107.3	53.908	87.33	79.17	53.83	0.57	4736.19
40	3.86	3.97	10	7.273	7.273	tr|T0E668|T0E668_CLOSO	Pyruvate formate lyase family protein OS=Paeniclostridium sordellii ATCC 9714 GN=H477_1816 PE=4 SV=1			2	99	TSTFLDIYFER				0.017401	1390.69	696.354	1390.68	696.346	2	12	1.1.1.3043.3	46.6408	131.4	101.91	46.47	0.34	5226.07
40	3.86	3.97	10	7.273	7.273	tr|T0E668|T0E668_CLOSO	Pyruvate formate lyase family protein OS=Paeniclostridium sordellii ATCC 9714 GN=H477_1816 PE=4 SV=1			1.82391	99	SGIITGLPDAYGR				-0.0267301	1318.66	660.338	1318.69	660.351	2	11	1.1.1.2949.4	35.9988	116.54	94.18	35.89	0.45	7679.72
40	3.86	3.97	10	7.273	7.273	tr|T0E668|T0E668_CLOSO	Pyruvate formate lyase family protein OS=Paeniclostridium sordellii ATCC 9714 GN=H477_1816 PE=4 SV=1			0.0366845	28.28	AIMPYGGIR				-0.0157574	976.501	489.258	976.516	489.265	2	8	1.1.1.2917.4	32.3638	139.04	111.63	32.26	0.34	13690.1
41	3.8	3.98	28.33	28.33	19.17	tr|T0CV21|T0CV21_CLOSO	50S ribosomal protein L7/L12 OS=Paeniclostridium sordellii ATCC 9714 GN=rplL PE=3 SV=1			2	99	MTIEQILEAIENMK				-0.0407703	1661.8	831.905	1661.84	831.926	2	15	1.1.1.3226.2	65.3183	401.55	351.06	65.4	0.45	5967.13
41	3.8	3.98	28.33	28.33	19.17	tr|T0CV21|T0CV21_CLOSO	50S ribosomal protein L7/L12 OS=Paeniclostridium sordellii ATCC 9714 GN=rplL PE=3 SV=1			1.65758	99	VLELNELVK				-0.00594528	1055.62	528.816	1055.62	528.819	2	13	1.1.1.2973.3	38.6911	255.36	246.59	38.63	0.23	11252
41	3.8	3.98	28.33	28.33	19.17	tr|T0CV21|T0CV21_CLOSO	50S ribosomal protein L7/L12 OS=Paeniclostridium sordellii ATCC 9714 GN=rplL PE=3 SV=1			0.140862	72.62	EITGLGLK				-0.0158163	829.475	415.745	829.491	415.753	2	8	1.1.1.2908.4	31.3416	278.39	275.56	31.35	0.23	7767.13
41	3.8	3.98	28.33	28.33	19.17	tr|T0CV21|T0CV21_CLOSO	50S ribosomal protein L7/L12 OS=Paeniclostridium sordellii ATCC 9714 GN=rplL PE=3 SV=1			0.000434512	80.22	EITGLGLKEAK	Carbamyl(K)@8		missed K-E@8	-0.0354652	1200.64	601.325	1200.67	601.343	2	10	1.1.1.2913.3	31.8751	235.16	215.76	31.8	0.34	11372.1
41	3.8	3.98	28.33	28.33	19.17	tr|T0CV21|T0CV21_CLOSO	50S ribosomal protein L7/L12 OS=Paeniclostridium sordellii ATCC 9714 GN=rplL PE=3 SV=1			0	99	MTIEQILEAIENMK	Formyl@N-term			0.0139718	1689.85	845.93	1689.83	845.923	2	14	1.1.1.3264.3	69.3554	192.52	158.8	69.2	0.23	5462.89
41	3.8	3.98	28.33	28.33	19.17	tr|T0CV21|T0CV21_CLOSO	50S ribosomal protein L7/L12 OS=Paeniclostridium sordellii ATCC 9714 GN=rplL PE=3 SV=1			0	99	MTIEQILEAIENMK	Deamidated(Q)@5			-0.00307861	1662.82	832.416	1662.82	832.418	2	13	1.1.1.3225.3	65.2392	240.68	163.34	65.4	0.45	4214.52
41	3.8	3.98	28.33	28.33	19.17	tr|T0CV21|T0CV21_CLOSO	50S ribosomal protein L7/L12 OS=Paeniclostridium sordellii ATCC 9714 GN=rplL PE=3 SV=1			0	99	MTIEQILEAIENMK	Deamidated(Q)@5			-0.00307861	1662.82	832.416	1662.82	832.418	2	12	1.1.1.3229.2	65.6591	240.68	104.04	65.4	0.45	3365.13
42	3.16	3.33	18.58	18.58	18.58	tr|T0D4U1|T0D4U1_CLOSO	50S ribosomal protein L17 OS=Paeniclostridium sordellii ATCC 9714 GN=rplQ PE=3 SV=1			1.95861	99	RGDAAEMALIELV			missed R-G@1	0.0198718	1386.74	694.376	1386.72	694.366	2	11	1.1.1.3072.3	49.9338	158.44	153.33	49.97	0.34	5568.19
42	3.16	3.33	18.58	18.58	18.58	tr|T0D4U1|T0D4U1_CLOSO	50S ribosomal protein L17 OS=Paeniclostridium sordellii ATCC 9714 GN=rplQ PE=3 SV=1			1.20066	98.61	NLVTDLLR				0.00147957	942.551	472.283	942.55	472.282	2	9	1.1.1.3031.4	45.3125	140.86	127.74	45.21	0.23	4920.13
43	3.13	3.25	12.1	12.1	12.1	tr|T0E826|T0E826_CLOSO	S4 domain protein OS=Paeniclostridium sordellii ATCC 9714 GN=H477_0085 PE=4 SV=1			2	99	MPGIAGENLLSLLER				0.0667881	1611.93	806.973	1611.87	806.94	2	17	1.1.1.3109.3	54.1351	214.29	214.13	54.07	0.34	11242.1
43	3.13	3.25	12.1	12.1	12.1	tr|T0E826|T0E826_CLOSO	S4 domain protein OS=Paeniclostridium sordellii ATCC 9714 GN=H477_0085 PE=4 SV=1			1.13077	99	GIAGENLLSLLER			cleaved P-G@N-term	0.060657	1383.83	692.924	1383.77	692.893	2	12	1.1.1.3083.3	51.183	96.92	89.68	51.11	0.68	5318.19
44	3.11	3.24	14.79	14.79	14.79	tr|T0D7A9|T0D7A9_CLOSO	Uncharacterized protein OS=Paeniclostridium sordellii ATCC 9714 GN=H477_5566 PE=4 SV=1			2	99	IADSFFIELADQTDMK				0.0639906	1842.93	922.475	1842.87	922.443	2	16	1.1.1.3071.3	49.8203	116.62	113.32	49.86	0.91	7871.07
44	3.11	3.24	14.79	14.79	14.79	tr|T0D7A9|T0D7A9_CLOSO	Uncharacterized protein OS=Paeniclostridium sordellii ATCC 9714 GN=H477_5566 PE=4 SV=1			1.10791	98.94	YLYDEDFTK				0.0158837	1192.54	597.28	1192.53	597.272	2	9	1.1.1.2921.4	32.8181	108.1	107.77	32.82	0.45	5671.12
45	3.08	3.42	10.53	10.53	10.53	tr|T0E7B1|T0E7B1_CLOSO	Metallopeptidase M24 family protein OS=Paeniclostridium sordellii ATCC 9714 GN=H477_2217 PE=4 SV=1			1.56864	99	EQEGFIEPSFGTIAGYR				0.0113784	1899.91	950.963	1899.9	950.957	2	14	1.1.1.3002.4	42.0193	127.9	122.67	41.92	0.45	10984.2
45	3.08	3.42	10.53	10.53	10.53	tr|T0E7B1|T0E7B1_CLOSO	Metallopeptidase M24 family protein OS=Paeniclostridium sordellii ATCC 9714 GN=H477_2217 PE=4 SV=1			1.50864	99	FNPVVLSYALITLDK				0.0142626	1691.96	846.989	1691.95	846.982	2	11	1.1.1.3167.4	58.7215	81.93	78.04	58.62	1.36	2940.13
46	2.81	2.91	6.04	6.04	6.04	tr|T0D1H9|T0D1H9_CLOSO	Pyruvate ferredoxin/flavodoxin oxidoreductase family protein OS=Paeniclostridium sordellii ATCC 9714 GN=H477_1150 PE=4 SV=1			2	99	INMIMQSAFFK				0.00444056	1328.67	665.341	1328.66	665.338	2	13	1.1.1.3023.2	44.3351	214.73	194.23	44.41	0.45	8065.01
46	2.81	2.91	6.04	6.04	6.04	tr|T0D1H9|T0D1H9_CLOSO	Pyruvate ferredoxin/flavodoxin oxidoreductase family protein OS=Paeniclostridium sordellii ATCC 9714 GN=H477_1150 PE=4 SV=1			0.812479	96.55	FGDAPIR				-0.0139248	774.388	388.202	774.402	388.208	2	9	1.1.1.2877.4	27.8199	248.65	245.04	27.83	0.23	10624.1
47	2.37	2.39	10.34	10.34	10.34	tr|T0EAY0|T0EAY0_CLOSO	Peptidyl-prolyl cis-trans isomerase OS=Paeniclostridium sordellii ATCC 9714 GN=H477_0324 PE=3 SV=1			2	99	IIEGLDVVDEIASVK				0.025974	1598.9	800.459	1598.88	800.446	2	16	1.1.1.3055.4	48.0378	165.21	163.87	47.94	0.34	8560.13
47	2.37	2.39	10.34	10.34	10.34	tr|T0EAY0|T0EAY0_CLOSO	Peptidyl-prolyl cis-trans isomerase OS=Paeniclostridium sordellii ATCC 9714 GN=H477_0324 PE=3 SV=1			0.37366	99	IIEGLDVVDEIASVKTDR	Carbamyl(K)@15		missed K-T@15	0.0597482	2014.12	672.38	2014.06	672.36	3	17	1.1.1.3064.4	49.0599	94.71	94.51	49.06	0.45	5700.13
48	2.22	2.24	7.377	7.377	7.377	tr|T0D5Y9|T0D5Y9_CLOSO	Glutamine amidotransferase class-I family protein OS=Paeniclostridium sordellii ATCC 9714 GN=H477_5844 PE=4 SV=1			2	99	LFQALVDETTK				0.00616523	1263.68	632.846	1263.67	632.843	2	15	1.1.1.2955.4	36.6805	154.16	111.58	36.57	0.34	5223.13
48	2.22	2.24	7.377	7.377	7.377	tr|T0D5Y9|T0D5Y9_CLOSO	Glutamine amidotransferase class-I family protein OS=Paeniclostridium sordellii ATCC 9714 GN=H477_5844 PE=4 SV=1			0.221849	99	DNPMMQKLFQALVDETTK	Carbamyl(K)@7		missed K-L@7	0.0446948	2151.08	718.034	2151.03	718.019	3	15	1.1.1.3185.2	60.696	137.81	125.65	60.78	0.45	4495.13
49	2.13	2.14	13.04	13.04	13.04	tr|T2REA0|T2REA0_CLOSO	Coat F domain protein OS=Paeniclostridium sordellii ATCC 9714 GN=H477_4141 PE=4 SV=1			2	99	DAFTMACNHAYEVAQWLIQR	Carbamidomethyl(C)@7			0.116365	2423.23	808.751	2423.11	808.712	3	16	1.1.1.3109.4	54.1696	179.47	177.36	54.18	0.45	8414.95
49	2.13	2.14	13.04	13.04	13.04	tr|T2REA0|T2REA0_CLOSO	Coat F domain protein OS=Paeniclostridium sordellii ATCC 9714 GN=H477_4141 PE=4 SV=1			0.126679	99	EFLKDAFTMACNHAYEVAQWLIQR	Carbamyl(K)@4; Carbamidomethyl(C)@11		missed K-D@4	0.069219	2983.48	995.501	2983.41	995.478	3	15	1.1.1.3226.3	65.3528	224.41	202.21	65.28	0.45	7182.13
50	2.05	2.06	10.14	10.14	10.14	tr|T0EB21|T0EB21_CLOSO	Fascin domain protein OS=Paeniclostridium sordellii ATCC 9714 GN=H477_5266 PE=4 SV=1			2	99	FLGENLSGDTIILK				0.0102802	1518.84	760.427	1518.83	760.422	2	14	1.1.1.2997.3	41.4172	130.64	129.81	41.45	0.45	10640.1
50	2.05	2.06	10.14	10.14	10.14	tr|T0EB21|T0EB21_CLOSO	Fascin domain protein OS=Paeniclostridium sordellii ATCC 9714 GN=H477_5266 PE=4 SV=1			0.0491485	99	FLGENLSGDTIILKTPDEYIVR	Carbamyl(K)@14		missed K-T@14	0.0094752	2535.33	846.118	2535.32	846.115	3	15	1.1.1.3057.3	48.2305	139.41	137.51	48.17	0.45	10453.1
51	2.03	2.03	16.77	16.77	9.938	tr|T0E1V1|T0E1V1_CLOSO	Staygreen family protein OS=Paeniclostridium sordellii ATCC 9714 GN=H477_1887 PE=4 SV=1			2	99	VNVTIYEPYTLTYPIR				-0.0189283	1941.01	971.51	1941.02	971.52	2	13	1.1.1.3019.4	43.9498	125.37	122.45	43.85	0.68	6004.19
51	2.03	2.03	16.77	16.77	9.938	tr|T0E1V1|T0E1V1_CLOSO	Staygreen family protein OS=Paeniclostridium sordellii ATCC 9714 GN=H477_1887 PE=4 SV=1			0.0264104	62.62	VFLENRPQLLK	Deamidated(N)@5			-0.0556572	1356.72	453.248	1356.78	453.266	3	12	1.1.1.2926.4	33.386	136.81	132.68	33.29	0.34	4767.32
52	2.03	2.03	11.79	8.537	8.537	tr|T0DWE7|T0DWE7_CLOSO	Aminotransferase class-V family protein OS=Paeniclostridium sordellii ATCC 9714 GN=H477_3450 PE=3 SV=1			2	99	LSIGDFTTEEDIDFIIDNLPK				-0.0210989	2394.16	799.062	2394.18	799.069	3	16	1.1.1.3216.4	64.2861	124.15	122.12	64.3	0.57	3204.19
52	2.03	2.03	11.79	8.537	8.537	tr|T0DWE7|T0DWE7_CLOSO	Aminotransferase class-V family protein OS=Paeniclostridium sordellii ATCC 9714 GN=H477_3450 PE=3 SV=1			0.0277972	29.66	LIDGILER				-0.0237679	927.515	464.765	927.539	464.777	2	8	1.1.1.2937.4	34.6356	111.29	109.94	34.64	0.45	8781.13
53	2.01	2.01	13.48	13.48	13.48	tr|T0ECN0|T0ECN0_CLOSO	RNA polymerase Rpb1, domain 4 family protein OS=Paeniclostridium sordellii ATCC 9714 GN=H477_0042 PE=4 SV=1			2	99	EGLSVLEYFTSSHGAR				0.0290048	1751.88	584.966	1751.85	584.957	3	12	1.1.1.3032.4	45.426	85.04	77.93	45.32	0.34	5363.13
53	2.01	2.01	13.48	13.48	13.48	tr|T0ECN0|T0ECN0_CLOSO	RNA polymerase Rpb1, domain 4 family protein OS=Paeniclostridium sordellii ATCC 9714 GN=H477_0042 PE=4 SV=1			0.00966115	99	VIETWTETTEKVTDALMANLDR	Carbamyl(K)@11		missed K-V@11	-0.098887	2578.16	860.394	2578.26	860.427	3	13	1.1.1.3195.3	61.8661	79.93	70.56	61.69	1.02	3318.13
54	2.01	2.01	15.46	15.46	15.46	tr|T0CWY5|T0CWY5_CLOSO	Uncharacterized protein OS=Paeniclostridium sordellii ATCC 9714 GN=H477_5699 PE=4 SV=1			2	99	AVAFQTIEPTDASVSPYK				0.0103723	1922.97	962.494	1922.96	962.489	2	22	1.1.1.2946.3	35.6236	249.74	211.06	35.55	0.34	8805.13
54	2.01	2.01	15.46	15.46	15.46	tr|T0CWY5|T0CWY5_CLOSO	Uncharacterized protein OS=Paeniclostridium sordellii ATCC 9714 GN=H477_5699 PE=4 SV=1			0.00877392	99	CEDCCCNEGILK	Carbamidomethyl(C)@1; Carbamidomethyl(C)@4; Carbamidomethyl(C)@5; Carbamidomethyl(C)@6; Ammonia-loss(N)@7			0.0423161	1539.59	770.802	1539.55	770.78	2	13	1.1.1.2904.4	30.8872	282	281.69	30.79	0.34	8514.12
55	2	8	37.02	37.02	37.02	tr|T0D302|T0D302_CLOSO	Reverse rubrerythrin-1 OS=Paeniclostridium sordellii ATCC 9714 GN=H477_0313 PE=4 SV=1			2	99	IGVAQGVDPEILEGLR				-0.0131587	1664.9	833.456	1664.91	833.462	2	20	1.1.1.3004.3	42.212	220.2	203.62	42.25	0.34	12038.1
55	2	8	37.02	37.02	37.02	tr|T0D302|T0D302_CLOSO	Reverse rubrerythrin-1 OS=Paeniclostridium sordellii ATCC 9714 GN=H477_0313 PE=4 SV=1			0	99	AFLGLLNR				0.000924008	902.535	452.275	902.534	452.274	2	8	1.1.1.2986.4	40.2025	121.27	120.31	40.2	0.34	4698.19
55	2	8	37.02	37.02	37.02	tr|T0D302|T0D302_CLOSO	Reverse rubrerythrin-1 OS=Paeniclostridium sordellii ATCC 9714 GN=H477_0313 PE=4 SV=1			0	99	EGFPEVAEAYKR			missed K-R@11	-0.0282821	1394.65	465.892	1394.68	465.902	3	11	1.1.1.2911.4	31.6823	134.82	113.03	31.58	0.23	4691.07
55	2	8	37.02	37.02	37.02	tr|T0D302|T0D302_CLOSO	Reverse rubrerythrin-1 OS=Paeniclostridium sordellii ATCC 9714 GN=H477_0313 PE=4 SV=1			0	86.55	IAFEEAEHAAKFAELLGEVVVADTKANLK	Carbamyl(K)@11		missed K-F@11; missed K-A@25	-0.0289179	3155.62	1052.88	3155.65	1052.89	3	23	1.1.1.3250.2	67.7327	334.43	331.99	67.71	0.34	14215
55	2	8	37.02	37.02	37.02	tr|T0D302|T0D302_CLOSO	Reverse rubrerythrin-1 OS=Paeniclostridium sordellii ATCC 9714 GN=H477_0313 PE=4 SV=1			0	99	IAFEEAEHAAKFAELLGEVVVADTKANLKAR	Carbamyl@N-term; Carbamyl(K)@29		missed K-F@11; missed K-A@25; missed K-A@29	0.12038	3425.92	857.486	3425.79	857.456	4	20	1.1.1.3251.2	67.8462	370.38	361.88	67.82	0.34	19708.1
56	2	5.14	10.27	10.27	10.27	tr|T0DXC4|T0DXC4_CLOSO	Pyruvate flavodoxin/ferredoxin oxidoreductase, thiamine diP-bdg family protein OS=Paeniclostridium sordellii ATCC 9714 GN=H477_3129 PE=4 SV=1			2	99	LPIIHFFDGFR				0.00210275	1360.73	454.584	1360.73	454.584	3	11	1.1.1.3069.3	49.5932	125.07	113.82	49.64	0.34	2878.13
56	2	5.14	10.27	10.27	10.27	tr|T0DXC4|T0DXC4_CLOSO	Pyruvate flavodoxin/ferredoxin oxidoreductase, thiamine diP-bdg family protein OS=Paeniclostridium sordellii ATCC 9714 GN=H477_3129 PE=4 SV=1			0	97.4	ALSPNHPVTR				-0.0391347	1090.55	546.282	1090.59	546.301	2	9	1.1.1.2862.4	26.1154	77.86	69.25	26.01	0.23	2843.13
56	2	5.14	10.27	10.27	10.27	tr|T0DXC4|T0DXC4_CLOSO	Pyruvate flavodoxin/ferredoxin oxidoreductase, thiamine diP-bdg family protein OS=Paeniclostridium sordellii ATCC 9714 GN=H477_3129 PE=4 SV=1			0	99	GTAQNPDIYFQTR				0.0185257	1509.74	755.877	1509.72	755.868	2	13	1.1.1.2916.3	32.2158	342.17	304.33	32.15	0.34	8668.89
57	2	2	7.514	2.89	2.89	tr|T2RDE0|T2RDE0_CLOSO	Aminopeptidase 2 OS=Paeniclostridium sordellii ATCC 9714 GN=H477_5067 PE=4 SV=1			2	99	SPIECAPFVR	Carbamidomethyl(C)@5			-0.0010602	1174.58	588.297	1174.58	588.297	2	14	1.1.1.2922.2	32.8627	286.83	269.94	32.93	0.34	10058.1
57	2	2	7.514	2.89	2.89	tr|T2RDE0|T2RDE0_CLOSO	Aminopeptidase 2 OS=Paeniclostridium sordellii ATCC 9714 GN=H477_5067 PE=4 SV=1			0	17.76	VANFQKASAEALQEWR	Carbamyl(K)@6		missed K-A@6	0.0148027	1889.95	945.984	1889.94	945.977	2	14	1.1.1.3000.3	41.7578	295.4	279.63	41.8	0.45	10404.1
58	2	2	4.776	4.776	4.776	tr|T0CZT3|T0CZT3_CLOSO	Branched-chain-amino-acid aminotransferase OS=Paeniclostridium sordellii ATCC 9714 GN=ilvE PE=3 SV=1			2	99	LLMPEIPVDK				0.00511436	1153.65	577.831	1153.64	577.828	2	10	1.1.1.2974.4	38.8391	117.1	112.9	38.74	0.34	6909.13
58	2	2	4.776	4.776	4.776	tr|T0CZT3|T0CZT3_CLOSO	Branched-chain-amino-acid aminotransferase OS=Paeniclostridium sordellii ATCC 9714 GN=ilvE PE=3 SV=1			0.00348833	98.35	LLMPEIPVDKFIDACK	Carbamyl(M)@3; Carbamidomethyl(C)@15		missed K-F@10	0.043331	1931.03	966.524	1930.99	966.502	2	12	1.1.1.3084.3	51.2965	121.53	106.12	51.22	0.45	6736.12
59	2	2	42.22	16.67	16.67	tr|T0CDB2|T0CDB2_CLOSO	Uncharacterized protein OS=Paeniclostridium sordellii ATCC 9714 GN=H477_2974 PE=4 SV=1			2	99	SGEIVTDYTLGTEQK				-0.015576	1639.78	820.896	1639.79	820.904	2	17	1.1.1.2915.4	32.1367	286.05	284.17	32.14	0.34	8826.13
59	2	2	42.22	16.67	16.67	tr|T0CDB2|T0CDB2_CLOSO	Uncharacterized protein OS=Paeniclostridium sordellii ATCC 9714 GN=H477_2974 PE=4 SV=1			0	31.84	EFEKLLGYAISASNGVIRDDILR	Carbamyl@N-term; Deamidated(N)@14		missed K-L@4; missed R-D@18	0.190771	2622.56	875.193	2622.37	875.129	3	10	1.1.1.3079.3	50.7287	339.3	313.83	50.77	0.45	14412.1
60	2	2	8.75	8.75	8.75	tr|T2RGL8|T2RGL8_CLOSO	Uncharacterized protein OS=Paeniclostridium sordellii ATCC 9714 GN=H477_4098 PE=4 SV=1			2	99	FNQNECGKPCNPVK	Carbamidomethyl(C)@6; Carbamidomethyl(C)@10			-0.0583101	1690.7	564.573	1690.76	564.592	3	13	1.1.1.2863.2	26.16	924.57	884.94	26.14	0.34	26738
60	2	2	8.75	8.75	8.75	tr|T2RGL8|T2RGL8_CLOSO	Uncharacterized protein OS=Paeniclostridium sordellii ATCC 9714 GN=H477_4098 PE=4 SV=1			0	99	FNQNECGKPCNPVK	Carbamidomethyl(C)@6; Carbamyl(K)@8; Carbamidomethyl(C)@10			-0.0060287	1733.76	867.885	1733.76	867.888	2	15	1.1.1.2871.2	27.0692	661.56	618.34	27.03	0.23	16722.2
61	2	2	13.87	13.87	13.87	tr|T2RFS0|T2RFS0_CLOSO	Uncharacterized protein OS=Paeniclostridium sordellii ATCC 9714 GN=H477_3692 PE=4 SV=1			2	99	YFIGQTPQLNANSSTALIALVNPR				0.109116	2587.49	863.502	2587.38	863.466	3	20	1.1.1.3061.4	48.7193	406.94	201.48	48.4	0.45	9491.07
61	2	2	13.87	13.87	13.87	tr|T2RFS0|T2RFS0_CLOSO	Uncharacterized protein OS=Paeniclostridium sordellii ATCC 9714 GN=H477_3692 PE=4 SV=1			0	99	YFIGQTPQLNANSSTALIALVNPR				0.109116	2587.49	863.502	2587.38	863.466	3	23	1.1.1.3058.4	48.3785	406.94	394.85	48.4	0.45	16008.1
62	2	2	4.152	4.152	4.152	tr|T2REI3|T2REI3_CLOSO	Phosphopyruvate hydratase OS=Paeniclostridium sordellii ATCC 9714 GN=eno PE=4 SV=1			2	99	AALELIVEAISK				0.0182358	1255.76	628.886	1255.74	628.877	2	14	1.1.1.3090.2	51.9434	182.25	178.67	51.92	0.34	9008.94
63	2	2	11.52	11.52	11.52	tr|T2RDG5|T2RDG5_CLOSO	Phosphoglycerate kinase OS=Paeniclostridium sordellii ATCC 9714 GN=H477_4615 PE=3 SV=1			2	99	ELASLAEIFVNDAFGTAHR				0.0704101	2060.1	687.708	2060.03	687.685	3	16	1.1.1.3160.3	57.8924	113.73	97.18	57.72	0.9	3449.19
64	2	2	3.39	3.39	3.39	tr|T2RCL9|T2RCL9_CLOSO	ATP synthase F1, alpha subunit OS=Paeniclostridium sordellii ATCC 9714 GN=H477_4869 PE=4 SV=1			2	99	STVAQVVNTLEK				-0.0482077	1287.66	644.835	1287.7	644.859	2	15	1.1.1.2956.3	36.7596	152.13	102.96	36.47	0.57	6726.38
65	2	2	9.677	9.677	9.677	tr|T2RCL7|T2RCL7_CLOSO	ATP synthase alpha/beta chain, C terminal domain protein OS=Paeniclostridium sordellii ATCC 9714 GN=H477_4864 PE=4 SV=1			2	99	FLSQPFTVAEQFTGFEGK				0.0890412	2032.08	1017.05	2031.99	1017	2	17	1.1.1.3060.3	48.5712	170.52	167.55	48.61	0.45	10654.1
66	2	2	6.073	6.073	6.073	tr|T0EF15|T0EF15_CLOSO	2-oxoglutarate synthase subunit korA OS=Paeniclostridium sordellii ATCC 9714 GN=korA PE=4 SV=1			2	99	TPVILLLDEVIGHMR				-0.049095	1704.91	569.311	1704.96	569.327	3	16	1.1.1.3229.4	65.728	110.89	109.31	65.74	0.45	2597.13
66	2	2	6.073	6.073	6.073	tr|T0EF15|T0EF15_CLOSO	2-oxoglutarate synthase subunit korA OS=Paeniclostridium sordellii ATCC 9714 GN=korA PE=4 SV=1			0	99	TPVILLLDEVIGHMR				-0.049095	1704.91	569.311	1704.96	569.327	3	13	1.1.1.3232.3	66.0341	110.89	52.77	65.74	0.45	2099.19
67	2	2	5.195	5.195	5.195	tr|T0EC95|T0EC95_CLOSO	Glutamate/Leucine/Phenylalanine/Valine dehydrogenase family protein OS=Paeniclostridium sordellii ATCC 9714 GN=H477_0218 PE=3 SV=1			2	99	AFEEIWALAGDR				0.0225972	1376.7	689.355	1376.67	689.344	2	14	1.1.1.3034.4	45.6533	94.19	75.68	45.55	0.45	4560.25
68	2	2	10.48	10.48	10.48	tr|T0EC36|T0EC36_CLOSO	UDP-N-acetylglucosamine 1-carboxyvinyltransferase 1 OS=Paeniclostridium sordellii ATCC 9714 GN=murA1 PE=4 SV=1			2	99	AGAALILCGLIAEGETEIGDIYHIQR	Carbamidomethyl(C)@8			-0.0996194	2782.33	928.452	2782.43	928.485	3	18	1.1.1.3248.3	67.5403	176.34	170.94	67.58	0.34	5033.13
69	2	2	8.491	8.491	8.491	tr|T0EA98|T0EA98_CLOSO	Creatinase/Prolidase N-terminal domain protein OS=Paeniclostridium sordellii ATCC 9714 GN=H477_5621 PE=4 SV=1			2	99	LNAVLDQMR				-0.0187882	1058.54	530.275	1058.55	530.284	2	10	1.1.1.2912.3	31.7614	308.38	298.02	31.8	0.23	12866.2
70	2	2	14.93	14.93	14.93	tr|T0E9N3|T0E9N3_CLOSO	Propanediol utilization PduL family protein OS=Paeniclostridium sordellii ATCC 9714 GN=H477_1156 PE=4 SV=1			2	99	SIVFENVLVR				-0.0032237	1174.67	588.341	1174.67	588.343	2	10	1.1.1.2994.3	41.0765	326.48	296.97	41.12	0.23	11011.1
70	2	2	14.93	14.93	14.93	tr|T0E9N3|T0E9N3_CLOSO	Propanediol utilization PduL family protein OS=Paeniclostridium sordellii ATCC 9714 GN=H477_1156 PE=4 SV=1			0	89.74	SIVFENVLVR				-0.0032237	1174.67	588.341	1174.67	588.343	2	9	1.1.1.2997.4	41.4516	326.48	63.31	41.12	0.23	4072.12
71	2	2	7.353	7.353	7.353	tr|T0E856|T0E856_CLOSO	RNA polymerase Rpb2, domain 6 family protein OS=Paeniclostridium sordellii ATCC 9714 GN=H477_0038 PE=4 SV=1			2	99	FGEMEVWALEAYGAAHILQEILTVK				0.00233495	2817.44	940.155	2817.44	940.154	3	15	1.1.1.3266.3	69.5823	127.07	126.81	69.52	0.34	11444
72	2	2	3.324	3.324	3.324	tr|T0E528|T0E528_CLOSO	Putative amidase domain protein OS=Paeniclostridium sordellii ATCC 9714 GN=H477_1207 PE=4 SV=1			2	99	TPSWTAADPFGR				0.0259885	1304.64	653.328	1304.61	653.315	2	14	1.1.1.2967.4	38.044	124.22	123.69	38.05	0.45	6565.07
72	2	2	3.324	3.324	3.324	tr|T0E528|T0E528_CLOSO	Putative amidase domain protein OS=Paeniclostridium sordellii ATCC 9714 GN=H477_1207 PE=4 SV=1			0	98.75	TPSWTAADPFGR				0.0259885	1304.64	653.328	1304.61	653.315	2	11	1.1.1.2968.2	38.0886	124.22	115.27	38.05	0.45	11498
73	2	2	8	8	8	tr|T0E4N7|T0E4N7_CLOSO	Acetate kinase OS=Paeniclostridium sordellii ATCC 9714 GN=ackA PE=3 SV=1			2	99	MLLIPTNEELMIAR				0.0155368	1642.89	822.454	1642.88	822.447	2	14	1.1.1.3037.3	45.9595	218.79	199.49	46.01	0.34	9396.13
74	2	2	6.061	6.061	6.061	tr|T0E3Z3|T0E3Z3_CLOSO	Glycine/sarcosine/betaine reductase complex component C subunit beta domain protein OS=Paeniclostridium sordellii ATCC 9714 GN=H477_0807 PE=4 SV=1			2	99	MTNLFDGVSFIVER				0.0237869	1626.83	814.423	1626.81	814.411	2	16	1.1.1.3079.2	50.6942	219.08	214.96	50.76	0.57	8820.07
75	2	2	10.53	10.53	10.53	tr|T0E1S4|T0E1S4_CLOSO	Cupin domain protein OS=Paeniclostridium sordellii ATCC 9714 GN=H477_1872 PE=4 SV=1			2	99	HPNGEQVFFFLK	Deamidated(N)@3			0.0319055	1462.76	732.385	1462.72	732.37	2	16	1.1.1.3030.3	45.1644	212.31	202.49	45.21	0.57	10563.2
75	2	2	10.53	10.53	10.53	tr|T0E1S4|T0E1S4_CLOSO	Cupin domain protein OS=Paeniclostridium sordellii ATCC 9714 GN=H477_1872 PE=4 SV=1			0	99	HPNGEQVFFFLK	Deamidated(N)@3			0.0319055	1462.76	732.385	1462.72	732.37	2	11	1.1.1.3027.4	44.8582	212.31	83.64	45.21	0.57	4499.13
75	2	2	10.53	10.53	10.53	tr|T0E1S4|T0E1S4_CLOSO	Cupin domain protein OS=Paeniclostridium sordellii ATCC 9714 GN=H477_1872 PE=4 SV=1			0	34.91	HPNGEQVFFFLK	Deamidated(Q)@6			0.0319055	1462.76	732.385	1462.72	732.37	2	17	1.1.1.3030.3	45.1644	212.31	202.49	45.21	0.57	10563.2
76	2	2	6.042	6.042	6.042	tr|T0DS66|T0DS66_CLOSO	Peptidase T OS=Paeniclostridium sordellii ATCC 9714 GN=pepT PE=4 SV=1			2	99	AGIAEIVTAIEYLVNHPEIK				-0.064579	2179.12	727.382	2179.19	727.404	3	17	1.1.1.3258.3	68.675	159.5	154.83	68.61	0.23	8122.13
77	2	2	6.818	6.818	6.818	tr|T0D495|T0D495_CLOSO	30S ribosomal protein S8 OS=Paeniclostridium sordellii ATCC 9714 GN=rpsH PE=3 SV=1			2	99	ILLEEGFIR				-0.0202807	1088.6	545.309	1088.62	545.319	2	10	1.1.1.2984.4	39.9753	193.35	193.18	39.88	0.34	11816
78	2	2	10.55	10.55	10.55	tr|T0D3S8|T0D3S8_CLOSO	Pyruvate flavodoxin/ferredoxin oxidoreductase, thiamine diP-bdg family protein OS=Paeniclostridium sordellii ATCC 9714 GN=H477_0136 PE=4 SV=1			2	99	TPVYAPATVQEAVDMVMEAFEVADYYR				0.157548	3064.58	1022.53	3064.42	1022.48	3	25	1.1.1.3264.4	69.3899	225.9	223.87	69.29	0.34	14465
79	2	2	2.761	2.761	2.761	tr|T0D2U3|T0D2U3_CLOSO	Arginine--tRNA ligase OS=Paeniclostridium sordellii ATCC 9714 GN=argS PE=3 SV=1			2	99	VVFLEDVLR				-0.0177176	1088.61	545.31	1088.62	545.319	2	10	1.1.1.3027.2	44.7892	64.34	61.07	44.75	0.45	3199.06
80	2	2	20.63	20.63	20.63	tr|T0CXI1|T0CXI1_CLOSO	Uncharacterized protein OS=Paeniclostridium sordellii ATCC 9714 GN=H477_5489 PE=4 SV=1			2	99	NTLGEIIQFLIDK				-0.0306202	1502.8	752.409	1502.83	752.424	2	13	1.1.1.3247.3	67.4267	147	143.49	67.46	0.34	3358.07
81	2	2	6.993	6.993	6.993	tr|T0CV11|T0CV11_CLOSO	50S ribosomal protein L13 OS=Paeniclostridium sordellii ATCC 9714 GN=rplM PE=3 SV=1			2	99	MATEIATILR				0.01233	1117.63	559.822	1117.62	559.816	2	12	1.1.1.2972.2	38.543	206.12	183.25	38.5	0.34	9268.03
82	2	2	2.395	2.395	2.395	tr|T0CTR3|T0CTR3_CLOSO	CO dehydrogenase/acetyl-CoA synthase delta subunit OS=Paeniclostridium sordellii ATCC 9714 GN=H477_0476 PE=4 SV=1			2	99	ALPLFALR				-0.010748	899.548	450.781	899.559	450.787	2	9	1.1.1.3020.4	44.0634	133.13	130.38	44.08	0.34	3420.13
83	2	2	5.525	5.525	5.525	tr|T0CTP6|T0CTP6_CLOSO	Prismane/CO dehydrogenase family protein OS=Paeniclostridium sordellii ATCC 9714 GN=H477_0456 PE=4 SV=1			2	99	ILNVVAEVAK				-0.0201959	1054.62	528.317	1054.64	528.327	2	11	1.1.1.2948.4	35.8852	353.5	351.73	35.89	0.34	12262.1
83	2	2	5.525	5.525	5.525	tr|T0CTP6|T0CTP6_CLOSO	Prismane/CO dehydrogenase family protein OS=Paeniclostridium sordellii ATCC 9714 GN=H477_0456 PE=4 SV=1			0	99	ILNVVAEVAK				-0.0201959	1054.62	528.317	1054.64	528.327	2	11	1.1.1.2946.4	35.6581	353.5	183.52	35.89	0.34	6545.13
84	2	2	16.67	16.67	16.67	tr|T0CMT1|T0CMT1_CLOSO	RutC family protein OS=Paeniclostridium sordellii ATCC 9714 GN=H477_3046 PE=4 SV=1			2	99	SLESLKEILAASGATFADVVK			missed K-E@6	0.0459106	2148.21	717.078	2148.17	717.063	3	18	1.1.1.3118.2	55.1223	247.15	143.03	54.96	0.34	3582.19
84	2	2	16.67	16.67	16.67	tr|T0CMT1|T0CMT1_CLOSO	RutC family protein OS=Paeniclostridium sordellii ATCC 9714 GN=H477_3046 PE=4 SV=1			0	99	SLESLKEILAASGATFADVVK			missed K-E@6	0.0459106	2148.21	717.078	2148.17	717.063	3	20	1.1.1.3115.3	54.8163	247.15	202.56	54.96	0.34	4690.12
84	2	2	16.67	16.67	16.67	tr|T0CMT1|T0CMT1_CLOSO	RutC family protein OS=Paeniclostridium sordellii ATCC 9714 GN=H477_3046 PE=4 SV=1			0	99	SLESLKEILAASGATFADVVK	Carbamyl(K)@6		missed K-E@6	-0.0632945	2191.11	731.377	2191.17	731.398	3	23	1.1.1.3194.3	61.7525	473.94	413.48	61.81	0.34	8479.13
84	2	2	16.67	16.67	16.67	tr|T0CMT1|T0CMT1_CLOSO	RutC family protein OS=Paeniclostridium sordellii ATCC 9714 GN=H477_3046 PE=4 SV=1			0	98.98	SLESLKEILAASGATFADVVK	Carbamyl(K)@6		missed K-E@6	-0.0632945	2191.11	731.377	2191.17	731.398	3	12	1.1.1.3197.3	62.0932	473.94	162.87	61.81	0.34	3525.13
85	2	2	7.347	7.347	7.347	tr|T0CMB6|T0CMB6_CLOSO	Protein RecA OS=Paeniclostridium sordellii ATCC 9714 GN=H477_3286 PE=3 SV=1			2	99	SGAIDIIVIDSVAALVPK				-0.0468173	1779.99	891.001	1780.03	891.025	2	14	1.1.1.3224.4	65.1601	115.29	103.48	65.28	0.65	3273.13
86	2	2	9.938	9.938	9.938	tr|T0CG35|T0CG35_CLOSO	Peptidylprolyl isomerase OS=Paeniclostridium sordellii ATCC 9714 GN=H477_2781 PE=4 SV=1			2	99	LLEDLVNQELFYLEAK				0.0452802	1936.06	969.04	1936.02	969.017	2	16	1.1.1.3104.3	53.5675	130.71	128.83	53.5	0.57	7045.13
87	1.89	2	37.8	37.8	37.8	tr|T0E0R1|T0E0R1_CLOSO	Coat F domain protein OS=Paeniclostridium sordellii ATCC 9714 GN=H477_1527 PE=4 SV=1			1.88606	99	EMISDYLSSINASLAGYGGIIAQTENEQLRK			missed R-K@30	0.127572	3370.8	1124.61	3370.67	1124.56	3	15	1.1.1.3126.4	56.065	186.27	127.22	55.86	0.34	4239.13
88	1.72	2	7.931	7.931	7.931	tr|T0ECN6|T0ECN6_CLOSO	Small GTP-binding domain protein OS=Paeniclostridium sordellii ATCC 9714 GN=H477_0047 PE=4 SV=1			1.72125	99	GVQLLLDAVIDYLPAPTDIPAIK				0.0297305	2434.4	812.475	2434.37	812.465	3	13	1.1.1.3241.4	66.849	98.71	78.23	66.74	0.86	2729.95
89	1.62	1.96	4.104	4.104	4.104	tr|T0DZF4|T0DZF4_CLOSO	M42 glutamyl aminopeptidase family protein OS=Paeniclostridium sordellii ATCC 9714 GN=H477_2794 PE=4 SV=1			1.61979	99	TNLQSIIETIK				-0.0112682	1258.7	630.358	1258.71	630.364	2	12	1.1.1.3015.3	43.4613	114.15	108.8	43.4	0.34	5896.13
90	1.4	1.72	13.51	13.51	13.51	tr|T2RDS8|T2RDS8_CLOSO	Glyceraldehyde 3-phosphate dehydrogenase, C-terminal domain protein OS=Paeniclostridium sordellii ATCC 9714 GN=H477_4616 PE=4 SV=1			1.39794	99	TLGYFANLAK				0.00288986	1096.59	549.305	1096.59	549.303	2	10	1.1.1.2967.2	37.975	148.7	138.86	37.94	0.23	6727.13
91	1.3	1.64	4.455	4.455	4.455	tr|T0CFX2|T0CFX2_CLOSO	Elongation factor Ts OS=Paeniclostridium sordellii ATCC 9714 GN=tsf PE=3 SV=1			1.30103	99	DAEVLAMGR				0.0129773	960.483	481.249	960.47	481.242	2	9	1.1.1.2899.3	30.2846	148.31	124.88	30.21	0.34	6974.75
92	1.21	1.55	12.16	12.16	12.16	tr|T0D143|T0D143_CLOSO	Acyl carrier protein OS=Paeniclostridium sordellii ATCC 9714 GN=acpP PE=3 SV=1			1.20761	99	FVCIGDIVK	Carbamidomethyl(C)@3			0.00215995	1049.56	525.787	1049.56	525.786	2	11	1.1.1.2970.3	38.3502	189.78	184.35	38.38	0.34	10059.1
93	1.17	1.52	10.6	10.6	10.6	tr|T0D100|T0D100_CLOSO	Sporulation transcription factor Spo0A OS=Paeniclostridium sordellii ATCC 9714 GN=spo0A PE=4 SV=1			1.16749	99	TQPDVLVLDVIMPHLDGLGVIEK				-0.101969	2500.26	834.427	2500.36	834.461	3	13	1.1.1.3189.3	61.1847	124.65	114.65	61.12	0.45	4959.88
94	1.04	1.39	6.422	6.422	6.422	tr|T2RE01|T2RE01_CLOSO	Melibiase family protein OS=Paeniclostridium sordellii ATCC 9714 GN=H477_4187 PE=4 SV=1			1.03621	99	INPWSAFLTGVQGK				0.0179234	1516.82	759.418	1516.8	759.409	2	13	1.1.1.3074.3	50.1609	103.2	102.79	50.2	0.57	6016.19
95	1	1.58	84.62	84.62	84.62	tr|T2RDK8|T2RDK8_CLOSO	Small, acid-soluble spore protein beta OS=Paeniclostridium sordellii ATCC 9714 GN=H477_4660 PE=4 SV=1			0.732828	98.4	LEIANELGLSNYDTVDKGNLTAR			missed K-G@17	0.00917883	2505.28	836.101	2505.27	836.098	3	14	1.1.1.2983.4	39.8616	146.77	124.55	39.75	0.34	11120.1
95	1	1.58	84.62	84.62	84.62	tr|T2RDK8|T2RDK8_CLOSO	Small, acid-soluble spore protein beta OS=Paeniclostridium sordellii ATCC 9714 GN=H477_4660 PE=4 SV=1			0.241088	98.03	QNGYVGGYMTK	Deamidated(N)@2			-0.0318908	1217.51	609.761	1217.54	609.777	2	11	1.1.1.2887.3	28.9215	400.85	320.53	28.84	0.34	16477
95	1	1.58	84.62	84.62	84.62	tr|T2RDK8|T2RDK8_CLOSO	Small, acid-soluble spore protein beta OS=Paeniclostridium sordellii ATCC 9714 GN=H477_4660 PE=4 SV=1			0.0172766	99	AVPEAKAALNQMK	Carbamyl@N-term		missed K-A@6	-0.0092571	1412.74	707.375	1412.74	707.38	2	11	1.1.1.2916.4	32.2503	328.67	326.18	32.26	0.23	11609.1
95	1	1.58	84.62	84.62	84.62	tr|T2RDK8|T2RDK8_CLOSO	Small, acid-soluble spore protein beta OS=Paeniclostridium sordellii ATCC 9714 GN=H477_4660 PE=4 SV=1			0.0101054	98.66	KLVEMAER	Carbamyl@N-term		missed K-L@1	-0.0231152	1017.5	509.76	1017.53	509.771	2	9	1.1.1.2884.4	28.6152	424.75	422.43	28.61	0.34	17609.6
95	1	1.58	84.62	84.62	84.62	tr|T2RDK8|T2RDK8_CLOSO	Small, acid-soluble spore protein beta OS=Paeniclostridium sordellii ATCC 9714 GN=H477_4660 PE=4 SV=1			0	91.06	QNGYVGGYMTK	Gln->pyro-Glu@N-term; Deamidated(N)@2			0.034226	1200.55	601.28	1200.51	601.263	2	9	1.1.1.2907.3	31.1935	232.35	148.05	31.01	0.45	8809.13
95	1	1.58	84.62	84.62	84.62	tr|T2RDK8|T2RDK8_CLOSO	Small, acid-soluble spore protein beta OS=Paeniclostridium sordellii ATCC 9714 GN=H477_4660 PE=4 SV=1			0	95.88	QNGYVGGYMTKK	Gln->pyro-Glu@N-term; Deamidated(N)@2; Carbamyl(K)@11		missed K-K@11	0.0148924	1371.63	686.821	1371.61	686.814	2	11	1.1.1.2910.2	31.4998	210.18	208.86	31.47	0.8	8628.07
95	1	1.58	84.62	84.62	84.62	tr|T2RDK8|T2RDK8_CLOSO	Small, acid-soluble spore protein beta OS=Paeniclostridium sordellii ATCC 9714 GN=H477_4660 PE=4 SV=1			0	95.88	QNGYVGGYMTKKLVEMAER	Carbamyl@N-term; Delta:H(2)C(2)(K)@12		missed K-K@11; missed K-L@12	0.049372	2242.14	1122.08	2242.09	1122.05	2	13	1.1.1.3095.4	52.5801	289.47	283.37	52.6	0.34	9791.13
95	1	1.58	84.62	84.62	84.62	tr|T2RDK8|T2RDK8_CLOSO	Small, acid-soluble spore protein beta OS=Paeniclostridium sordellii ATCC 9714 GN=H477_4660 PE=4 SV=1			0	95.88	QNGYVGGYMTKKLVEMAER	Carbamyl@N-term; Delta:H(2)C(2)(K)@11		missed K-K@11; missed K-L@12	0.049372	2242.14	1122.08	2242.09	1122.05	2	13	1.1.1.3095.4	52.5801	289.47	283.37	52.6	0.34	9791.13
95	1	1.58	84.62	84.62	84.62	tr|T2RDK8|T2RDK8_CLOSO	Small, acid-soluble spore protein beta OS=Paeniclostridium sordellii ATCC 9714 GN=H477_4660 PE=4 SV=1			0	93.24	QNGYVGGYMTKKLVEMAER	Gln->pyro-Glu@N-term; Hypusine(K)@11	Hypusine(K)@52	missed K-K@11; missed K-L@12	0.0259051	2243.13	1122.57	2243.11	1122.56	2	11	1.1.1.3098.2	52.8517	348.11	292.67	52.71	0.34	11128.1
95	1	1.58	84.62	84.62	84.62	tr|T2RDK8|T2RDK8_CLOSO	Small, acid-soluble spore protein beta OS=Paeniclostridium sordellii ATCC 9714 GN=H477_4660 PE=4 SV=1			0	45.16	QNGYVGGYMTKKLVEMAER	Hypusine(K)@11	Hypusine(K)@52	missed K-K@11; missed K-L@12	-0.0397353	2260.09	754.372	2260.13	754.385	3	10	1.1.1.3065.2	49.1045	468.84	368.31	49.19	0.34	12107.8
96	0.89	1.31	23.53	23.53	23.53	tr|T0CUI5|T0CUI5_CLOSO	Ribosomal subunit interface protein OS=Paeniclostridium sordellii ATCC 9714 GN=H477_0165 PE=4 SV=1			0.886057	99	AEDTEENLYAAIDVVYDKLNIQLR			missed K-L@18	0.0695469	2794.47	932.498	2794.4	932.475	3	12	1.1.1.3161.3	58.006	122.33	114.99	57.94	0.57	5827.06
97	0.87	1.3	10.73	10.73	10.73	tr|T0D6Z2|T0D6Z2_CLOSO	Uncharacterized protein OS=Paeniclostridium sordellii ATCC 9714 GN=H477_5615 PE=4 SV=1			0.866461	99	FMTIAYIPVDQELPTTPFK				0.051812	2210.19	1106.1	2210.13	1106.07	2	11	1.1.1.3068.4	49.5141	111.64	93.51	49.41	0.45	6849.12
98	0.77	1.2	8.182	3.333	3.333	tr|T0ECM5|T0ECM5_CLOSO	RNA polymerase Rpb2, domain 6 family protein OS=Paeniclostridium sordellii ATCC 9714 GN=H477_0037 PE=3 SV=1			0.769551	98.79	LSALGPGGLSR				-0.0449313	1026.54	514.276	1026.58	514.298	2	12	1.1.1.2900.4	30.4327	114.15	102.37	30.33	0.34	10223.1
99	0.65	1.07	5.59	5.59	5.59	tr|T0E2K2|T0E2K2_CLOSO; tr|T0CZ18|T0CZ18_CLOSO	Metallopeptidase M24 family protein OS=Paeniclostridium sordellii ATCC 9714 GN=H477_2218 PE=4 SV=1; Metallopeptidase M24 family protein OS=Paeniclostridium sordellii ATCC 9714 GN=H477_2221 PE=4 SV=1			0.645892	98.23	GYNLDILAR				0.00816865	1033.56	517.789	1033.56	517.785	2	8	1.1.1.2968.4	38.1576	131.92	104.9	38.05	0.45	6362.13
100	0.59	1	3.863	3.863	3.863	tr|T0CRP9|T0CRP9_CLOSO	Acetate kinase OS=Paeniclostridium sordellii ATCC 9714 GN=ackA PE=3 SV=1			0.58838	98.17	IGIEGSILK				-0.0149038	928.544	465.279	928.559	465.287	2	11	1.1.1.2939.3	34.8283	205.9	203.94	34.77	0.34	6161.04
101	0.55	0.97	7.609	7.609	7.609	tr|T2RG70|T2RG70_CLOSO	Uncharacterized protein OS=Paeniclostridium sordellii ATCC 9714 GN=H477_3888 PE=4 SV=1			0.549751	98.51	EDWEFIR				-0.0108508	993.445	497.73	993.456	497.735	2	8	1.1.1.2965.3	37.7823	225.61	202.49	37.71	0.23	8212.18
102	0.54	0.96	2.827	2.827	2.827	tr|T2RDD1|T2RDD1_CLOSO	Proline racemase A OS=Paeniclostridium sordellii ATCC 9714 GN=H477_4642 PE=3 SV=1			0.539102	97.74	TAIMLEPR				-0.0177944	929.483	465.749	929.5	465.758	2	9	1.1.1.2905.3	30.9663	150.71	135.34	30.89	0.34	4790.03
103	0.49	0.91	5.369	5.369	5.369	tr|T0D2K8|T0D2K8_CLOSO	D-lactate dehydrogenase OS=Paeniclostridium sordellii ATCC 9714 GN=ldhD PE=3 SV=1			0.490797	97.57	WSANLIAR				-0.0188221	929.49	465.752	929.508	465.761	2	8	1.1.1.2924.3	33.1243	141.29	132.41	33.06	0.23	5852.07
104	0.47	0.9	5.53	5.53	5.53	RRRRRtr|T0EB11|T0EB11_CLOSO	REVERSED Uncharacterized protein OS=Paeniclostridium sordellii ATCC 9714 GN=H477_5245 PE=4 SV=1			0.474955	97.89	ISATITAEEHMK				0.00654572	1329.67	665.841	1329.66	665.837	2	10	1.1.1.2957.4	36.9077	3789.68	90.41	35.22	0.45	7718.12
105	0.39	0.78	2.581	2.581	2.581	tr|T0CMZ2|T0CMZ2_CLOSO	Thiamine pyrophosphate enzyme, C-terminal TPP binding domain protein OS=Paeniclostridium sordellii ATCC 9714 GN=H477_3127 PE=4 SV=1			0.385103	97.21	DFLMSQVR				-0.00798505	994.483	498.249	994.491	498.253	2	8	1.1.1.2938.2	34.6802	93.26	89.86	34.65	0.34	5695.07
106	0.35	0.73	11.11	11.11	11.11	tr|T0E5Y2|T0E5Y2_CLOSO	Uncharacterized protein OS=Paeniclostridium sordellii ATCC 9714 GN=H477_1731 PE=4 SV=1			0.345823	97	ELMNYHVVFTMR				-0.0177015	1538.72	513.914	1538.74	513.92	3	10	1.1.1.2978.2	39.2246	547.5	456.19	39.31	0.34	18215.1
106	0.35	0.73	11.11	11.11	11.11	tr|T0E5Y2|T0E5Y2_CLOSO	Uncharacterized protein OS=Paeniclostridium sordellii ATCC 9714 GN=H477_1731 PE=4 SV=1			0	25.06	ELMNYHVVFTMR	Oxidation(M)@3			0.00619923	1554.74	519.253	1554.73	519.251	3	8	1.1.1.2979.3	39.3728	141.2	122.59	39.3	0.34	10851.1
107	0.34	0.73	5.988	5.988	5.988	tr|T0DX29|T0DX29_CLOSO	Germination protease OS=Paeniclostridium sordellii ATCC 9714 GN=gpr PE=3 SV=1			0.335358	96.02	VIAIDALASR				-0.0254469	1027.58	514.796	1027.6	514.809	2	10	1.1.1.2942.3	35.1691	175.55	146.99	35.09	0.34	9497.12
108	0.32	0.49	5.161	5.161	5.161	tr|T0DZ75|T0DZ75_CLOSO	Uncharacterized protein OS=Paeniclostridium sordellii ATCC 9714 GN=H477_2709 PE=4 SV=1			0.317855	96.29	LYDTNIAR				-0.0255552	964.472	483.243	964.498	483.256	2	8	1.1.1.2879.3	28.0127	208.76	167.95	27.93	0.34	8229.77
109	0.28	0.45	4.444	4.444	0	tr|T0CUY1|T0CUY1_CLOSO	50S ribosomal protein L5 OS=Paeniclostridium sordellii ATCC 9714 GN=rplE PE=3 SV=1			0.278189	94.72	LLGMPYSK				-0.0139629	907.47	454.742	907.484	454.749	2	10	1.1.1.2926.4	33.386	78.71	59.9	33.28	0.34	4767.32
110	0.21	0.36	4.255	4.255	0	tr|T0E461|T0E461_CLOSO	GTP-sensing transcriptional pleiotropic repressor CodY OS=Paeniclostridium sordellii ATCC 9714 GN=codY PE=3 SV=1			0.209715	93.47	LGTLILSR				-0.0279207	871.521	436.768	871.549	436.782	2	9	1.1.1.2928.4	33.6132	91.67	91.67	33.52	0.34	4923.05
111	0.17	0.3	4.118	4.118	0	tr|T0CLM2|T0CLM2_CLOSO	Peptidase S49 family protein OS=Paeniclostridium sordellii ATCC 9714 GN=H477_3295 PE=4 SV=1			0.169411	91.94	ITQFITR				-0.0219064	877.48	439.747	877.502	439.758	2	8	1.1.1.2892.3	29.4895	172.08	162.44	29.43	0.34	8101.98
112	0.11	0.22	8.911	8.911	0	tr|T0CR71|T0CR71_CLOSO	Uncharacterized protein OS=Paeniclostridium sordellii ATCC 9714 GN=H477_0853 PE=4 SV=1			0.114639	89.38	INSILCEAK	Carbamidomethyl(C)@6			-0.0300769	1046.51	524.264	1046.54	524.279	2	13	1.1.1.2902.3	30.6255	193.23	175.93	30.56	0.23	9344.11
113	0.1	0.21	11.83	11.83	0	tr|T0CUY7|T0CUY7_CLOSO	30S ribosomal protein S5 OS=Paeniclostridium sordellii ATCC 9714 GN=rpsE PE=3 SV=1			0.0491485	75.58	NMVNATIEGLR				-0.0109031	1216.61	609.313	1216.62	609.319	2	9	1.1.1.2949.3	35.9643	116.55	104	35.89	0.45	8784
113	0.1	0.21	11.83	11.83	0	tr|T0CUY7|T0CUY7_CLOSO	30S ribosomal protein S5 OS=Paeniclostridium sordellii ATCC 9714 GN=rpsE PE=3 SV=1			0.0467237	83.1	AVLELAGLK				-0.0126535	912.552	457.283	912.564	457.289	2	10	1.1.1.2957.3	36.8732	108.93	107.26	36.9	0.34	5412.11
114	0.09	0.2	6.863	6.863	0	tr|T0E2A7|T0E2A7_CLOSO	ATP-dependent dethiobiotin synthetase BioD OS=Paeniclostridium sordellii ATCC 9714 GN=bioD PE=3 SV=1			0.0909791	87.84	SSVGTINHTFLTVK				-0.025973	1502.78	752.399	1502.81	752.412	2	9	1.1.1.2936.4	34.522	81.89	72.64	34.64	0.57	7203.13
115	0.09	0.2	12.5	12.5	0	tr|T0CQL2|T0CQL2_CLOSO	Thioredoxin OS=Paeniclostridium sordellii ATCC 9714 GN=H477_2648 PE=3 SV=1			0.090444	92.49	FGISTVPTMMIFK				0.0339457	1470.8	736.405	1470.76	736.388	2	9	1.1.1.3073.4	50.0818	84.32	75.44	49.98	0.91	4035.19
116	0.08	0.18	4.301	4.301	0	tr|T0CSN0|T0CSN0_CLOSO	Ornithine carbamoyltransferase OS=Paeniclostridium sordellii ATCC 9714 GN=H477_2544 PE=3 SV=1			0.0757207	85.15	MYDGIEYR				-0.0076649	1045.45	523.73	1045.45	523.734	2	7	1.1.1.2896.3	29.9439	139.45	116.12	29.87	0.34	7676.95
117	0.06	0.17	13.81	13.81	0	tr|T0E6N8|T0E6N8_CLOSO	Prismane/CO dehydrogenase family protein OS=Paeniclostridium sordellii ATCC 9714 GN=H477_0455 PE=4 SV=1			0.0433514	84.15	VNIILHGHEPSLSEMVVLASEDPELLALAK				-0.125707	3223.59	806.905	3223.72	806.936	4	11	1.1.1.3105.3	53.681	96.58	83.96	53.61	0.57	7984.13
117	0.06	0.17	13.81	13.81	0	tr|T0E6N8|T0E6N8_CLOSO	Prismane/CO dehydrogenase family protein OS=Paeniclostridium sordellii ATCC 9714 GN=H477_0455 PE=4 SV=1			0.0195421	64.39	VYIPELK				-0.0203293	860.48	431.248	860.501	431.258	2	9	1.1.1.2930.4	33.8404	117.4	109.09	33.74	0.34	3640.25
117	0.06	0.17	13.81	13.81	0	tr|T0E6N8|T0E6N8_CLOSO	Prismane/CO dehydrogenase family protein OS=Paeniclostridium sordellii ATCC 9714 GN=H477_0455 PE=4 SV=1			0	86.55	EAILNFKNR	Carbamyl(K)@7		missed K-N@7	-0.0271556	1146.59	574.301	1146.61	574.315	2	12	1.1.1.2928.2	33.5442	288.49	277.17	33.51	0.23	11451.8
118	0.05	0.13	15.69	15.69	0	tr|T0D4J9|T0D4J9_CLOSO	60 kDa chaperonin OS=Paeniclostridium sordellii ATCC 9714 GN=H477_0242 PE=3 SV=1			0.0462403	93.91	TALQNAASIAGVFLTTEAAVADLPEAEPVPGMGGGMPPMM	Deamidated(N)@5			0.18507	3913.05	979.27	3912.87	979.224	4	14	1.1.1.3256.3	68.4482	290.47	289.36	68.47	0.34	23629.1

## Sheet: Protein Summary Rep 2
N	Unused	Total	%Cov	%Cov(50)	%Cov(95)	Accession	Name	Species	Peptides(95%)			Gene Ontology	Gene Names	Pathway	Interactions	Protein Families	Subcellular Location	Function	Disease	Tissue Specificity	Keywords	Modifications	Natural Variants	Glycosylations	Propeptide	Signal Peptide	Initiator Methionine	Sequence Conflicts	Sequence Uncertainties	Alternative Sequence	Non-Standard Residues	Lipidations	Disulfide Bonds	Cross Links	Protein Existence	InterPro	Polymorphism	PTM	RNA Editing	Active Site	Binding Site	Entry	Entry Name	Entry Status	Sequence	Protein Names	Organism	Sequence Length	Features
1	42	42	62.88	62.88	62.88	tr|T2RG98|T2RG98_CLOSO	Uncharacterized protein OS=Paeniclostridium sordellii ATCC 9714 GN=H477_4099 PE=4 SV=1	CLOSO	29				ORF Names: H477_4099								Complete proteome; Reference proteome														predicted							T2RG98	T2RG98_CLOSO	not reviewed	MADRIFDFKCVNQQIPRSIAPQVFTVDPRPMGCPPYTAGAPVCIEKVTVVYDCLGFSNDLLPITLCNTSGSLTGTPQLCPSGEASVFHNYEGTISTGCICREKGSTATLVQGPLDASIYNFQYIVEGFIGCDPFTARFPVTPSDAPDFLTNINLFSTICLPNTDDPLTLRAQFDLKFVVKSIVPTTPFSGGTFSARIFDELLISEKLYLTKSDALVVYSAPAEFKHHEK	Uncharacterized protein	Paeniclostridium sordellii ATCC 9714	229
2	36	36	60.3	60.3	60.3	tr|T0DXD7|T0DXD7_CLOSO	Uncharacterized protein OS=Paeniclostridium sordellii ATCC 9714 GN=H477_3144 PE=4 SV=1	CLOSO	21				ORF Names: H477_3144								Complete proteome; Reference proteome														predicted							T0DXD7	T0DXD7_CLOSO	not reviewed	MFRVFTDGKKSNGDDLDFKYELGNLCGPLPSSARTNVTIEKVCINYSSIKINPGTTSLEQLKIEKVDRKSQKCKSVFEYDVCGQLNRCCNDKCLGQNVAYKEKGLNVVVYDLELELTGRFGCSEFTAVAIPCSKCESKHDNSNCVVFYFNTLSGDLVVPADGRGFTLRQDFQTQLTVDCIGKGVITQKMVNNKPCYELDIPNGIDLVLCLQNVVSALIEEQIIVLGGPTRIRPRLVDTFGSVCDFSQFTGKCEADDDENHNNHKCCK	Uncharacterized protein	Paeniclostridium sordellii ATCC 9714	267
3	32	32	57.38	51.48	51.48	tr|T0D4X3|T0D4X3_CLOSO	Translation elongation factor Tu OS=Paeniclostridium sordellii ATCC 9714 GN=tuf PE=4 SV=1	CLOSO	23			intracellular; GTP binding; GTPase activity; translation elongation factor activity	tuf (orf: H477_0026)								Complete proteome; Elongation factor; Protein biosynthesis; Reference proteome														predicted	IPR004161; IPR033720; IPR027417; IPR000795; IPR009000; IPR009001; IPR004541; IPR004160						T0D4X3	T0D4X3_CLOSO	not reviewed	MITGAAQMDGAILVCSATDGPMPQTREHILLSRQVGVPYIVVFLNKCDMVDDEELLELVEMEVRDLLNEYEFPGDDTPIVRGSALMALQDSSSEWGDKIVELFEQIDEYIPAPERDVDKDFLMPVEDVFSITGRGTVATGRVERGVLKVQDEVELVGLAEEPRKLVVTGVEMFRKLLDEAQAGDNIGALIRGIQRNEIERGQVLAKPGTVKPHTKFNAEVYVLKKEEGGRHTPFFDGYRPQFYFRTTDVTGACKLPEGVEMVMPGDNIQMTIELINSIAIEEGLRFAIREGGRTVASGVVASIIE	Translation elongation factor Tu	Paeniclostridium sordellii ATCC 9714	305	domain (1)
4	22	22	55.67	55.67	55.67	tr|T0DRL7|T0DRL7_CLOSO	Uncharacterized protein OS=Paeniclostridium sordellii ATCC 9714 GN=H477_2973 PE=4 SV=1	CLOSO	12				ORF Names: H477_2973								Complete proteome; Reference proteome														predicted	IPR021328						T0DRL7	T0DRL7_CLOSO	not reviewed	MLESKLRSGNNPNVSENLINYVNQLNNNSKLLINGLISFKERLLNGVLSCNLFTGNYPLLIEHILREAKLYLSLVQDLENRVDIETKSNKETELFWDQIMMEHALFIRGLLDPSENELIDTADEFADDFEDLIKEARNMTDATINNMTDETLEKTIELKNFKQAGTEGIASCKIRSIILPLLADHVLREANHYIRILQAYKNQ	Uncharacterized protein	Paeniclostridium sordellii ATCC 9714	203
5	20	20	94.44	94.44	94.44	tr|T0E503|T0E503_CLOSO	Small, acid-soluble spore protein alpha OS=Paeniclostridium sordellii ATCC 9714 GN=H477_1172 PE=4 SV=1	CLOSO	16			double-stranded DNA binding; DNA topological change	ORF Names: H477_1172								Complete proteome; Reference proteome														predicted	IPR001448; IPR018126						T0E503	T0E503_CLOSO	not reviewed	MTNNNNQNSISVPEAKAALKQMKLEIANELGMSNYDTADKGNMTARQNGYVGGYMTKKLVEMAEKQMSGQQQ	Small, acid-soluble spore protein alpha	Paeniclostridium sordellii ATCC 9714	72
6	14	14	30.68	30.68	30.68	tr|T0E6L8|T0E6L8_CLOSO	Peptidase M20/M25/M40 family protein OS=Paeniclostridium sordellii ATCC 9714 GN=H477_0435 PE=4 SV=1	CLOSO	7			hydrolase activity; proteolysis	ORF Names: H477_0435								Complete proteome; Reference proteome														predicted	IPR002933; IPR011650; IPR001160						T0E6L8	T0E6L8_CLOSO	not reviewed	MDIIKQRGNANKLLGRLLNLLDVDFDLAKVEGGSKNNAIPREADAVIMINNDQKDKFVACVKEITEIFKHELRTSDPGFEIVCTETTKPELVFNAKSKDSVIKVLNLIPNAIQTMSMDIENLVESSTNLGVLRTTDSTVTFECAVRSSVKSLKDDITARMELLISEFGGKLDLISDYPAWEYAKGSELEKICVKAFENINGKEPIIMALHAGLECGLLLDKIPNAEAISFGPNMYDVHTPNEHLSISSTDNTWKYLLEILKSMK	Peptidase M20/M25/M40 family protein	Paeniclostridium sordellii ATCC 9714	264	domain (1)
7	14	14	28.97	28.97	28.97	tr|T0D2M7|T0D2M7_CLOSO	Putative peptidoglycan binding domain protein OS=Paeniclostridium sordellii ATCC 9714 GN=H477_0372 PE=4 SV=1	CLOSO	7				ORF Names: H477_0372								Complete proteome; Reference proteome														predicted	IPR002477						T0D2M7	T0D2M7_CLOSO	not reviewed	MPEDKNAPNYWVYFKDYIKNVASSEIYSTWPTETIFANIIAIISFTLNRVFTEWYRSKGYNFTITSTTAFDHKYIHERNVFDTISVVVDEIFNTFIKRPPTARQPLLAQYCDGVKSQCPGQMTQWGSKDLGDQGLSYEEILRSFYGEGIVFEKAPVVSGVPVSFPGEVLQIGSKGKDVQTVQNQLNAISNAYPAIPKVREDGIFGDALANSIKEFQGIFGLPKSGVVDFKTWYELSRIYVAVTKIASLNPTI	Putative peptidoglycan binding domain protein	Paeniclostridium sordellii ATCC 9714	252	domain (1)
8	12	16	84.62	84.62	84.62	tr|T2RDK8|T2RDK8_CLOSO	Small, acid-soluble spore protein beta OS=Paeniclostridium sordellii ATCC 9714 GN=H477_4660 PE=4 SV=1	CLOSO	16			double-stranded DNA binding; DNA topological change	ORF Names: H477_4660								Complete proteome; Reference proteome														predicted	IPR001448; IPR018126						T2RDK8	T2RDK8_CLOSO	not reviewed	MSTKKAVPEAKAALNQMKLEIANELGLSNYDTVDKGNLTARQNGYVGGYMTKKLVEMAERQMSGK	Small, acid-soluble spore protein beta	Paeniclostridium sordellii ATCC 9714	65
9	12	12	37.43	37.43	37.43	tr|T2RFG7|T2RFG7_CLOSO	Uncharacterized protein OS=Paeniclostridium sordellii ATCC 9714 GN=H477_4384 PE=4 SV=1	CLOSO	8				ORF Names: H477_4384								Complete proteome; Reference proteome														predicted							T2RFG7	T2RFG7_CLOSO	not reviewed	MERNYWQEYWDNYCKFMAVYLTELQNAYPDADIKNEYVEVANLFEPAMPLEYYENFDEYEDIDNDPERENDPPVGAQSIAPFIFPGGGQQSISPGGGQQSPTPFISPGGGQFTINNCRRVAIVRIVMRRGFTPSNFFMAVDRADNRSIQGFRIACESGRIRFVPMAVEYRNINFIECAF	Uncharacterized protein	Paeniclostridium sordellii ATCC 9714	179
10	12	12	31.75	31.75	31.75	tr|T2RDU1|T2RDU1_CLOSO	ATP synthase subunit beta, sodium ion specific OS=Paeniclostridium sordellii ATCC 9714 GN=atpD PE=4 SV=1	CLOSO	6			ATP binding; hydrolase activity; ATP metabolic process; proton transport	atpD (orf: H477_4865)								Complete proteome; Hydrolase; Reference proteome														predicted	IPR003593; IPR004100; IPR000194; IPR027417						T2RDU1	T2RDU1_CLOSO	not reviewed	MANLGKIVQVIGPVVDVKFNDEKSLPNLLNALEIKHGDKKIVIEVAQHVGDDTVRCISMSSTDGLVRGMEVVDTGAAISVPVGDETLGRIFNVLGEPVDGKAAPKDAPKSPIHREAPAFDELKPGVEILETGIKVVDLLAPYLKGGKIGLFGGAGVGKTVLIQELINNIATQHGGISVFAGVGERTREGNDLYGEMSESGVINKTALVFGQMNEPPGARMRVALTGLTMAEYFRDQEGQDVLLFVDNIFRFTQAGSEVSALLGRTHQQLDTNQH	ATP synthase subunit beta, sodium ion specific	Paeniclostridium sordellii ATCC 9714	274	domain (1)
11	12	12	27.65	27.65	27.65	tr|T0E6S9|T0E6S9_CLOSO	Glycosyl hydrolases 18 family protein OS=Paeniclostridium sordellii ATCC 9714 GN=H477_2042 PE=3 SV=1	CLOSO	10			chitinase activity; carbohydrate metabolic process; chitin catabolic process	ORF Names: H477_2042			Belongs to the glycosyl hydrolase 18 family.					Complete proteome; Glycosidase; Hydrolase; Reference proteome														inferred from homology	IPR011583; IPR029070; IPR001223; IPR001579; IPR013781; IPR017853						T0E6S9	T0E6S9_CLOSO	not reviewed	MRQLLALRQDNPDLRVIVAIGGWGQDGFSDAALTPSSRYNFAREVNALIKEYNLDGIDIDWEYPATSAAGIKSRPEDRENFTLLLTAIRDVIGYDKWLSVAGTGDKAYINQSVEIDNIAPLIDYFNLMSYDFTAGETGPNAKKHHSNLYDSNLSIPGYSADAMVRNLIAAGMPSQKILLGIPFYGRLGATITKSYDQLRKDFINKNGYTYKFDRDAQAPYLEREGEFAMSYDDILSIYIKGQYVIDNCLGGMFSWMAPYDRANILARAMNEGINDPNKLRQEIEDTYGPGFLK	Glycosyl hydrolases 18 family protein	Paeniclostridium sordellii ATCC 9714	293	domain (1)
12	10	10	22.44	22.44	22.44	tr|T0E9M9|T0E9M9_CLOSO	Pyruvate flavodoxin/ferredoxin oxidoreductase, thiamine diP-bdg family protein OS=Paeniclostridium sordellii ATCC 9714 GN=H477_1151 PE=4 SV=1	CLOSO	6			oxidoreductase activity	ORF Names: H477_1151								Complete proteome; Pyruvate; Reference proteome														predicted	IPR033412; IPR002880; IPR029061; IPR009014						T0E9M9	T0E9M9_CLOSO	not reviewed	MIPNMYKVAGELLPGVFHVSARALASQALSIFGDHQDVMSARQTGCVLLASGSVQEVADIAPVAHLAAIEGRLPFIHFFDGFRTSHEIQKVELLENEDYAKLLNMEAVQEFRNRALSPNHPVTRGTAQNPDIYFQTREASNKYYNDIVGIVEKYMNQMSELTGRKHGLFDYYGAEDAKYVIVAMGSVTEAIEETIDVLNAQGEKYGLVKVHLYRPFSMKHFMDSMPSTVERICVLDRTKEPGATGEPLYLDVKSVYYGNEKAPMVIGGRYGLGSKDTTPTQIKTVYDNLKSETPKDQFTLGIVDDVTNTSLN	Pyruvate flavodoxin/ferredoxin oxidoreductase, thiamine diP-bdg family protein	Paeniclostridium sordellii ATCC 9714	312	domain (2)
13	10	10	22.44	22.44	22.44	tr|T0CP16|T0CP16_CLOSO	Peroxiredoxin OS=Paeniclostridium sordellii ATCC 9714 GN=H477_2044 PE=3 SV=1	CLOSO	8			cytoplasm; peroxiredoxin activity; cell redox homeostasis	ORF Names: H477_2044			Belongs to the AhpC/TSA family. TDXH subfamily.; Contains 1 thioredoxin domain.	Cytoplasm.	Protects cells against oxidative stress. Can reduce hydrogen peroxide and/or alkyl hydroperoxides using dithiothreitol as an electron donor (in vitro).			Antioxidant; Complete proteome; Cytoplasm; Oxidoreductase; Redox-active center; Reference proteome														inferred from homology	IPR000866; IPR019479; IPR022915; IPR012336; IPR013766				46 Cysteine sulfenic acid (-SOH) intermediate	123 Substrate	T0CP16	T0CP16_CLOSO	not reviewed	MPCLPSLGTKAPNFSANTTFGPIKLSDYKGKWVVLFSHPGDFTPVCTTEFLCFAKYYSNFQKRNTELIGLSVDSNSSHLAWVYNIYRNTGVEIPFPIIDDRKMEISQLYGMISEPMSDSSTVRSVFIIDPNQILRTILYYPLTTGRNIPEIVRIIDALQTSDEQKVVTPADWLPGMPVILPPPKTYKELKQRISSCEKDKECIDWYLCFVPDKNLGIKSNKSINKKKLTAKSRPQINSPEDYVPQNPNCPDINN	Peroxiredoxin	Paeniclostridium sordellii ATCC 9714	254	domain (1); active site (1); binding site (1)
14	10	10	29.06	29.06	29.06	tr|T0CLP4|T0CLP4_CLOSO	Uncharacterized protein OS=Paeniclostridium sordellii ATCC 9714 GN=H477_3325 PE=4 SV=1	CLOSO	5				ORF Names: H477_3325								Complete proteome; Reference proteome														predicted							T0CLP4	T0CLP4_CLOSO	not reviewed	MGVYKEHLYVGATMELSNITSFITPKGCDVIRIDKNDNWQLIVGGEPLIATKPSVGERGKSLSGLMSGFNNPLNVYAWQIKEHDGKLLIGTLDHGITMEPVLEICIKNKELLRYLLEKRGIKVSPEEIIEQLEITIKKLKEIDYPYGFDLYTSKDGINFKPCIYKGLGNKQNYGSRILYVEMKINYILELQILTKVVKFGENEKLNYLTTLMMNFSIVIFSVRISNVNVIKIFY	Uncharacterized protein	Paeniclostridium sordellii ATCC 9714	234
15	8	8	23.7	23.7	23.7	tr|T2RFS0|T2RFS0_CLOSO	Uncharacterized protein OS=Paeniclostridium sordellii ATCC 9714 GN=H477_3692 PE=4 SV=1	CLOSO	4				ORF Names: H477_3692								Complete proteome; Reference proteome														predicted							T2RFS0	T2RFS0_CLOSO	not reviewed	MPIPYPLYQSEQGRYFIGQTPQLNANSSTALIALVNPRCSYVNLYINAITVTNLLQDNFSAEFYVHSNQTLNTTSYLISCTNLSIVPTPHNKGIIQYQSGYDLQIYNGVPIFTRIIPQTSTLVIDGGQIIIPPGQSLLVFLEGISSVSSSLNNKSFIVAFGWWEEQICTNYKL	Uncharacterized protein	Paeniclostridium sordellii ATCC 9714	173
16	8	8	32.67	32.67	32.67	tr|T2RCT6|T2RCT6_CLOSO	M42 glutamyl aminopeptidase family protein OS=Paeniclostridium sordellii ATCC 9714 GN=H477_4964 PE=4 SV=1	CLOSO	4			aminopeptidase activity; metallopeptidase activity	ORF Names: H477_4964								Aminopeptidase; Complete proteome; Hydrolase; Protease; Reference proteome														predicted	IPR001261; IPR007484						T2RCT6	T2RCT6_CLOSO	not reviewed	MINKQRLIDEFIELVKIDSPSSKEGNVAKTLVKKLEAIGCEVCIDEAGVRAGGETGNVIAKLKGNREGKTVLFSSHMDTVSPGEGIKPIIDEATGIIKSDGTTVLGSDDKAGIAAILEALRIIKENNIDHADIEVVFSIWEEGGLFGLNI	M42 glutamyl aminopeptidase family protein	Paeniclostridium sordellii ATCC 9714	150	domain (1)
17	8	8	40.57	40.57	40.57	tr|T0E0I6|T0E0I6_CLOSO	Uncharacterized protein OS=Paeniclostridium sordellii ATCC 9714 GN=H477_1422 PE=4 SV=1	CLOSO	7				ORF Names: H477_1422								Coiled coil; Complete proteome; Reference proteome														predicted							T0E0I6	T0E0I6_CLOSO	not reviewed	MSCKNNVWKGYKCIENQKWDNVCYYKCKDNGCGSKKCKAEIKDAKDLIDDAKDTNNMLGKDLKEALENQNAAKEGIKGLEDNLLNLACDLSDIKKALSNAVKNEII	Uncharacterized protein	Paeniclostridium sordellii ATCC 9714	106	coiled-coil region (1)
18	8	8	57.97	57.97	57.97	tr|T0DR76|T0DR76_CLOSO	Manganese containing catalase family protein OS=Paeniclostridium sordellii ATCC 9714 GN=H477_3486 PE=4 SV=1	CLOSO	4				ORF Names: H477_3486								Complete proteome; Reference proteome														predicted	IPR009078; IPR012347; IPR007760						T0DR76	T0DR76_CLOSO	not reviewed	MGNPVTDLHEDMAAEQKALATYYQLVNLTDDVDIKNVLRFLGEREIIHYQRFGEALMDVYDYQEQKQMF	Manganese containing catalase family protein	Paeniclostridium sordellii ATCC 9714	69
19	8	8	19.59	19.59	19.59	tr|T0D415|T0D415_CLOSO	TCP-1/cpn60 chaperonin family protein OS=Paeniclostridium sordellii ATCC 9714 GN=H477_0241 PE=4 SV=1	CLOSO	4			ATP binding	ORF Names: H477_0241								Complete proteome; Reference proteome														predicted	IPR017998; IPR002423; IPR027409; IPR027413						T0D415	T0D415_CLOSO	not reviewed	MAKEIKFAQESRSALEAGVNKLADTVKVTLGPKGRNVILDKKFGAPLITNDGVTIAKEIELEDRFENMGAQLVKEVATKTNDVAGDGTTTATVLAQAIIREGLKNVTAGSNPVLLRKGIQKAVEVSVDELKKQSRTIETKESISQVASISAGDEEVGNLIAEAMEIVGKDGVITVEESKTMHTELDAVEGMQFDRGFVSAYMVTDVDKMEAVLNDPYILITDRKITNIQDILPVLEQIVQQGKNY	TCP-1/cpn60 chaperonin family protein	Paeniclostridium sordellii ATCC 9714	245
20	8	8	17.99	17.99	17.99	tr|T0CNF5|T0CNF5_CLOSO	Hsp70 family protein OS=Paeniclostridium sordellii ATCC 9714 GN=H477_2996 PE=3 SV=1	CLOSO	5			ATP binding	ORF Names: H477_2996			Belongs to the heat shock protein 70 family.					ATP-binding; Coiled coil; Complete proteome; Nucleotide-binding; Reference proteome														inferred from homology	IPR018181; IPR013126						T0CNF5	T0CNF5_CLOSO	not reviewed	MGKIIGIDLGTTNSCVAVLEGGEPQIIPNSEGMRTTPSVVAFTKDGERIVGEPAKRQAVTNADRTIISIKTHMGTDYKVNIDGKEYSPQEISAIILQKLKADAESYLGQTVTEAVITVPAYFTDAQRQATKDAGRIAGLDVKRIINEPTAAALAYGMDKLDQEKKILVFDLGGGTFDVSVLEIGDGTFEVLATAGNNRLGGDDFDQVIIDYLAEEFKKTEGVDLRNDKMALQRLKEAAEKAKKELSSTMSTNINLPFITATAEGPKHLNIDLSRAKFDELTANLVEKTMEPTRRALQDAGLSTSEIDDVLLVGGSTRIPAVQEALRNS	Hsp70 family protein	Paeniclostridium sordellii ATCC 9714	328	coiled-coil region (1)
21	8	8	36.67	36.67	36.67	tr|T0CDB2|T0CDB2_CLOSO	Uncharacterized protein OS=Paeniclostridium sordellii ATCC 9714 GN=H477_2974 PE=4 SV=1	CLOSO	5				ORF Names: H477_2974								Complete proteome; Reference proteome														predicted	IPR021328						T0CDB2	T0CDB2_CLOSO	not reviewed	MINDQRYVILSLELHLFFARIMKEHSLFLESGFVTKDSKLELEADHYKREFEKLLGYAISASNGVIRDDILRSGEIVTDYTLGTEQKTQN	Uncharacterized protein	Paeniclostridium sordellii ATCC 9714	90
22	6	6	18.34	14.19	14.19	tr|T2REI3|T2REI3_CLOSO	Phosphopyruvate hydratase OS=Paeniclostridium sordellii ATCC 9714 GN=eno PE=4 SV=1	CLOSO	4			phosphopyruvate hydratase complex; magnesium ion binding; phosphopyruvate hydratase activity; glycolytic process	eno (orf: H477_4609)								Complete proteome; Lyase; Pyruvate; Reference proteome														predicted	IPR000941; IPR020810; IPR029065; IPR020811; IPR029017						T2REI3	T2REI3_CLOSO	not reviewed	MSLIDLVYAREVLDSRGNPTVEVEVVLESGATGRAIVPSGASTGAFEAVELRDGDKDRFLGKGVEKAVDNVNEIIAPELEGMDATDQPGIDGLLIELDGTPNKGKLGANAILGVSMAVARAAAEEVGLPLFQYLGGVNAKQLPVPMMNILNGGEHADNNVDVQEFMILPVGAKSFREGLRMGAEVFHSLKKVLGEKGLACGVGDEGGFAPNLDSNRAALELIVEAISKAGYEPGQDVMLGLDVAATEMYNKETKKYVLAGEGKELTSEQMVELYEDWANNFPIITIEDG	Phosphopyruvate hydratase	Paeniclostridium sordellii ATCC 9714	289	domain (2)
23	6	6	25	25	25	tr|T0E5Y2|T0E5Y2_CLOSO	Uncharacterized protein OS=Paeniclostridium sordellii ATCC 9714 GN=H477_1731 PE=4 SV=1	CLOSO	3			integral component of membrane	ORF Names: H477_1731								Complete proteome; Membrane; Reference proteome; Transmembrane; Transmembrane helix														predicted							T0E5Y2	T0E5Y2_CLOSO	not reviewed	MNSNKSNLNRNSNRNDSNLQDKCRELMNYHVVFTMRDGSMLDGIIEGVDDDNVTMLIGEDMVEGEGEGNQRQFGPRRFRRYRRRRIPFSRLVGLSLLAYPFIFPPFIF	Uncharacterized protein	Paeniclostridium sordellii ATCC 9714	108	transmembrane region (1)
24	6	6	30.14	23.97	23.97	tr|T0DW21|T0DW21_CLOSO	Uncharacterized protein OS=Paeniclostridium sordellii ATCC 9714 GN=H477_3327 PE=4 SV=1	CLOSO	5				ORF Names: H477_3327								Complete proteome; Reference proteome														predicted							T0DW21	T0DW21_CLOSO	not reviewed	MYDNNIYNDIYIDKKINLIEVLNDMLIYSKEKPYISKDLYDFIELLKFEKLNDINGFDENDLDNARQNNYVWSMAELEDYIYVGTGRNVLLQYLYRVAPNIDLSLDWMPNKIDNSAEIWRYKKDKSLPWQKVYKATKDSGIDDLDL	Uncharacterized protein	Paeniclostridium sordellii ATCC 9714	146
25	6	6	36.36	26.52	26.52	tr|T0D495|T0D495_CLOSO	30S ribosomal protein S8 OS=Paeniclostridium sordellii ATCC 9714 GN=rpsH PE=3 SV=1	CLOSO	3			ribosome; rRNA binding; structural constituent of ribosome; translation	rpsH (orf: H477_0067)			Belongs to the ribosomal protein S8P family.		One of the primary rRNA binding proteins, it binds directly to 16S rRNA central domain where it helps coordinate assembly of the platform of the 30S subunit.			Complete proteome; Reference proteome; Ribonucleoprotein; Ribosomal protein; RNA-binding; rRNA-binding														inferred from homology	IPR000630						T0D495	T0D495_CLOSO	not reviewed	MTMTDPIADMLTRIRNANMVKHETVDVPASNMKKELARILLEEGFIRGYDVIEDGKQGIIRIQLKYGQAGEKVITGLKRISKPGMRVYAAKEELPKVLNGLGISIISTSKGILTDRQARKEGVGGEVICYVW	30S ribosomal protein S8	Paeniclostridium sordellii ATCC 9714	132
26	6	6	16.59	16.59	16.59	tr|T0EB21|T0EB21_CLOSO	Fascin domain protein OS=Paeniclostridium sordellii ATCC 9714 GN=H477_5266 PE=4 SV=1	CLOSO	3				ORF Names: H477_5266								Complete proteome; Reference proteome														predicted	IPR008999; IPR022768						T0EB21	T0EB21_CLOSO	not reviewed	MDGKFLIQTEEGYYVKLDYKTKKLFAVETNKYDATKFKLNIINDKEVTLQTENNDYIQVNEDNILDAKAKTENERTKFKIKEVTKIAYDNIVIISLSQQRFVTAINGGGSYLAATEFNQTVNEEFTILQFLDNSYVIQTKGGYYVRVKDDRLLIADTKELEEASRFLGENLSGDTIILKTPDEYIVRVRDIDKYLIADTKEISDSSKFNIYMSTNPY	Fascin domain protein	Paeniclostridium sordellii ATCC 9714	217	domain (1)
27	6	6	21.55	21.55	21.55	tr|T0EAX3|T0EAX3_CLOSO	Reverse rubrerythrin-1 OS=Paeniclostridium sordellii ATCC 9714 GN=H477_0314 PE=4 SV=1	CLOSO	4			iron ion binding; NADH peroxidase activity	ORF Names: H477_0314			Contains 1 ferritin-like diiron domain.					Complete proteome; Oxidoreductase; Peroxidase; Reference proteome														predicted	IPR009040; IPR009078; IPR012347; IPR024934; IPR004039; IPR003251						T0EAX3	T0EAX3_CLOSO	not reviewed	MKKFVCTICGYIHEGEMPPEVCPVCKAPASKFEEMKGEMAWADEHRIGVAQGVDEEILEGLRANFTGECTEVGMYLAMSRQADREGFPEVAEAYKRIAFEEAEHAAKFAELLGEVVVADTQANLKARVEAEYGATDGKLKLAKKAKELGLDAIHDTVHEMCKDEARHGKAFLGLLNRHFGK	Reverse rubrerythrin-1	Paeniclostridium sordellii ATCC 9714	181	domain (2)
28	6	6	27.94	27.94	27.94	tr|T0E6D8|T0E6D8_CLOSO	Uncharacterized protein OS=Paeniclostridium sordellii ATCC 9714 GN=H477_1876 PE=4 SV=1	CLOSO	3				ORF Names: H477_1876								Complete proteome; Reference proteome														predicted	IPR025510						T0E6D8	T0E6D8_CLOSO	not reviewed	MDCFKTKDGNSIVRVFHASPNAPGVDVYIDNVLTLSDLKFTNLSDYTYLEEGLHKIDIHPAGDANTIVLSKMVDVPDDRIFTIAAVGNLNDLELMLIEDDIDEIPSTKEATFRVVHLSPNAPKVDVLANGNSIFENLGFKGNTDYIKVPSNSYDIDVVSSDSKDKVLSNKINLKANRIYTIYVVGNPPNLSLIQAVDVNSYLCR	Uncharacterized protein	Paeniclostridium sordellii ATCC 9714	204	domain (2)
29	6	6	35.87	35.87	35.87	tr|T0D4G1|T0D4G1_CLOSO	Elongation factor Tu GTP binding domain protein OS=Paeniclostridium sordellii ATCC 9714 GN=H477_0025 PE=4 SV=1	CLOSO	5			translation elongation factor activity	ORF Names: H477_0025								Complete proteome; Elongation factor; Protein biosynthesis; Reference proteome														predicted	IPR027417						T0D4G1	T0D4G1_CLOSO	not reviewed	MAKAKFERSKPHVNIGTIGHVDHGKTTLTAAITKTLFDRYQLGEAVDFANIDKAPEEKKEESQYQLLTLNMKLQIDTTLTLTAQDMLTTLRT	Elongation factor Tu GTP binding domain protein	Paeniclostridium sordellii ATCC 9714	92
30	6	6	35	35	35	tr|T0CV21|T0CV21_CLOSO	50S ribosomal protein L7/L12 OS=Paeniclostridium sordellii ATCC 9714 GN=rplL PE=3 SV=1	CLOSO	3			ribosome; structural constituent of ribosome; translation	rplL (orf: H477_0034)			Belongs to the ribosomal protein L7/L12P family.		Forms part of the ribosomal stalk which helps the ribosome interact with GTP-bound translation factors. Is thus essential for accurate translation.			Complete proteome; Reference proteome; Ribonucleoprotein; Ribosomal protein														inferred from homology	IPR000206; IPR014719; IPR013823; IPR008932						T0CV21	T0CV21_CLOSO	not reviewed	MTIEQILEAIENMKVLELNELVKAAEEKFGVSASAPVMMAGAVAGGAAEEKTEFDVVLASAGSSKVGVIKAVREITGLGLKEAKELVDNAPKTLKEGVSKDEADQMKEKLEAAGASVEVK	50S ribosomal protein L7/L12	Paeniclostridium sordellii ATCC 9714	120	domain (2)
31	6	6	47.3	47.3	47.3	tr|T0CMC7|T0CMC7_CLOSO	Uncharacterized protein OS=Paeniclostridium sordellii ATCC 9714 GN=H477_1423 PE=4 SV=1	CLOSO	5				ORF Names: H477_1423								Coiled coil; Complete proteome; Reference proteome														predicted							T0CMC7	T0CMC7_CLOSO	not reviewed	MIKDLNQILPDQQNAIEDIKDAKDKQKEVKGILDKLNKALDDVVDCLSERGSNPILIPWDEDCDKHPCKNDCDC	Uncharacterized protein	Paeniclostridium sordellii ATCC 9714	74	coiled-coil region (1)
32	4	4	8.192	8.192	8.192	tr|T2RCL9|T2RCL9_CLOSO	ATP synthase F1, alpha subunit OS=Paeniclostridium sordellii ATCC 9714 GN=H477_4869 PE=4 SV=1	CLOSO	2			proton-transporting ATP synthase complex, catalytic core F(1); ATP binding; proton-transporting ATP synthase activity, rotational mechanism; ATP synthesis coupled proton transport	ORF Names: H477_4869								Complete proteome; Hydrolase; Reference proteome														predicted	IPR023366; IPR033732; IPR005294; IPR020003; IPR004100; IPR000194; IPR027417						T2RCL9	T2RCL9_CLOSO	not reviewed	MAGELLEFPGKVYGMALNLEEEMVGAVILGDDSGIKEGDIVKRTGNIVQVPVGDVMIGRVVNSLGQPVDGKGPIKADKFRPVESEATGIMARKSVHEPLQTGIKAIDAMIPIGKGQRELVIGDRQTGKTSICIDTILNQKGKDVVCIYVAIGQKRSTVAQVVNTLEKGGAMDYTIVVSATASESAPLQFLAPYAGVAMGEEFMFNGKHVLIVYDDLTKHAVAYREMSLLLKRPPGREAYPGDVFYLHSRLLERAAKLSDELGAGSITALPIIETQGGDVSAYIPTNVISITDGQIYLVPELFYSGIRPAVDPGISVSRVGGSAQIKSMKKVSGPLKLLYSHIKNLQHSLNSDLT	ATP synthase F1, alpha subunit	Paeniclostridium sordellii ATCC 9714	354	domain (2)
33	4	4	21.25	12.5	12.5	tr|T0CQV5|T0CQV5_CLOSO	30S ribosomal protein S2 OS=Paeniclostridium sordellii ATCC 9714 GN=rpsB PE=3 SV=1	CLOSO	2			small ribosomal subunit; structural constituent of ribosome; translation	rpsB (orf: H477_2728)			Belongs to the ribosomal protein S2P family.					Complete proteome; Reference proteome; Ribonucleoprotein; Ribosomal protein														inferred from homology	IPR001865; IPR005706; IPR018130; IPR023591						T0CQV5	T0CQV5_CLOSO	not reviewed	MSVISMKQLLEAGVHFGHQTRRWNPKMAQYIFTERNGIYIIDLQKTVKKVEEAYRFTKEIAETGKPILFVGTKKQAQEAIKEEAERCGMFYVNERWLGGMLTNHKTIKTRIDKLRKLEKMEEEGVFNVLPKKEVIKLRAEKEKLEKYLNGIKDMPELPAAIFVVDPRKENIAIQEAHRLGIPVIGIVDTNCDPEQLDFAIPGNDDAIRAVKLITGAMATAIIEGRQAIADDQEEVTEDQE	30S ribosomal protein S2	Paeniclostridium sordellii ATCC 9714	240
34	4	4	49.32	49.32	49.32	tr|T2RCY2|T2RCY2_CLOSO	ATP synthase subunit alpha, sodium ion specific domain protein OS=Paeniclostridium sordellii ATCC 9714 GN=H477_4868 PE=4 SV=1	CLOSO	2			hydrolase activity; ATP synthesis coupled proton transport	ORF Names: H477_4868								Complete proteome; Hydrolase; Reference proteome														predicted	IPR000793						T2RCY2	T2RCY2_CLOSO	not reviewed	MDVQNQVVMIFAVVNNLLEDIPVNNIRRFETELLEFVDANYPQIGEKILANGDFTQELTNAINDFKKKFVIEA	ATP synthase subunit alpha, sodium ion specific domain protein	Paeniclostridium sordellii ATCC 9714	73	domain (1)
35	4	4	12.97	12.97	12.97	tr|T2RCV8|T2RCV8_CLOSO	Stage V sporulation protein T OS=Paeniclostridium sordellii ATCC 9714 GN=spoVT PE=4 SV=1	CLOSO	3			DNA binding	spoVT (orf: H477_4917)								Complete proteome; Reference proteome														predicted	IPR029016; IPR007159						T2RCV8	T2RCV8_CLOSO	not reviewed	MEVSIAYGATGIVRRIDDLGRVVIPKEIRKTLRIREGDPLEIFTAKDGEVILKKYSPIGELNEFSQEYAETLGETLGHGVAVTDLDSIIAVSKLPKKDYKEKSISKELEELIENRACHHVKDNKLIALYKDDSMDYKTQIIMPIISSSGDCIGSICLVSKNAAGLNESDEKLLKVAANFLGKQVQ	Stage V sporulation protein T	Paeniclostridium sordellii ATCC 9714	185	domain (1)
36	4	4	10.69	10.69	10.69	tr|T0ECN6|T0ECN6_CLOSO	Small GTP-binding domain protein OS=Paeniclostridium sordellii ATCC 9714 GN=H477_0047 PE=4 SV=1	CLOSO	2			GTP binding; GTPase activity	ORF Names: H477_0047								Complete proteome; Reference proteome														predicted	IPR031157; IPR027417; IPR005225; IPR000795						T0ECN6	T0ECN6_CLOSO	not reviewed	MARKFPLERTRNIGIMAHIDAGKTTTTERILFYTGQTHKIGETHEGASQMDWMEQEKERGITITSAATTAAWKDHRINIIDTPGHVDFTVEVERSLRVLDGSVAVFCAKGGVEPQSENVWRQADNYGVPRIAFVNKMDIMGADFYNVVQMMKDRLNANAVPMQLPIGKEDWLEGEVDLLEMKAHIYKDDLGVEIEITEIPEDMKELAQEWREKMVEAVAETDEELMMKYLEGEEPTIEELKTAIRKATIACEMNPVFCGSAYKNKGVQLLLDAVIDYLPAPTDIPAIKGI	Small GTP-binding domain protein	Paeniclostridium sordellii ATCC 9714	290	domain (1)
37	4	4	10.34	10.34	10.34	tr|T0EAY0|T0EAY0_CLOSO	Peptidyl-prolyl cis-trans isomerase OS=Paeniclostridium sordellii ATCC 9714 GN=H477_0324 PE=3 SV=1	CLOSO	2			peptidyl-prolyl cis-trans isomerase activity; protein folding	ORF Names: H477_0324			Belongs to the cyclophilin-type PPIase family.; Contains 1 PPIase cyclophilin-type domain.		PPIases accelerate the folding of proteins. It catalyzes the cis-trans isomerization of proline imidic peptide bonds in oligopeptides.			Complete proteome; Isomerase; Reference proteome; Rotamase														inferred from homology	IPR029000; IPR024936; IPR020892; IPR002130						T0EAY0	T0EAY0_CLOSO	not reviewed	MENKNPIVTIEMENGKQIKIELYPHIAPNTVKNFVSLVQSGFYDGLTFHRVIPGFMIQGGCPNGTGMGGPGHTIKGEFTQNGHTNNLRHERGVISMARTMAPNSAGSQFFLMHANSPHLDGQYASFGRIIEGLDVVDEIASVKTDRMDKPQTPQVMKKVTVETFGKDYSDVEKM	Peptidyl-prolyl cis-trans isomerase	Paeniclostridium sordellii ATCC 9714	174	domain (1)
38	4	4	32.73	32.73	32.73	tr|T0E9P7|T0E9P7_CLOSO	Uncharacterized protein OS=Paeniclostridium sordellii ATCC 9714 GN=H477_1171 PE=4 SV=1	CLOSO	2				ORF Names: H477_1171								Complete proteome; Reference proteome														predicted							T0E9P7	T0E9P7_CLOSO	not reviewed	MNMNFQEVKNKFINADLDEKIRIYTTTEGLTVDQFKELLKYYPIQHLSKLEKALG	Uncharacterized protein	Paeniclostridium sordellii ATCC 9714	55
39	4	4	7.331	7.331	7.331	tr|T0E6E7|T0E6E7_CLOSO	Acyl-CoA dehydrogenase, N-terminal domain protein OS=Paeniclostridium sordellii ATCC 9714 GN=H477_0355 PE=3 SV=1	CLOSO	2			acyl-CoA dehydrogenase activity; flavin adenine dinucleotide binding	ORF Names: H477_0355			Belongs to the acyl-CoA dehydrogenase family.					Complete proteome; FAD; Flavoprotein; Oxidoreductase; Reference proteome														inferred from homology	IPR006089; IPR006091; IPR009075; IPR013786; IPR009100						T0E6E7	T0E6E7_CLOSO	not reviewed	MIFNKEQELLRKAVRDFVSREMATLPEEIDKTGEMPRELLDKMAQTKYTSVTIPQEYGGAGADYVSYAIIMEELSRRCASTGTYATAAASLVSLPILNYGTEEQKQKYLRGIASGEMIGAFGLTEPGAGSDASAQQTTAELDGDYYILNGRKTFITNAPICDFAIVIAVTDRSKGLKGTTAFIVESNLEGFSHGAHEDKMGIRGTQTSDLIFENVKVPKENLLGKEGIGFKIAMKTLDAGRIGVAAQALGVAQGALDEAIKYTKERVQFGKTLSKFQNTQFTLADMETKVNAARWLVYDAAQKKDAGMNMTKESAMAKYYAAEIANEVAYKALNYMVDMDL	Acyl-CoA dehydrogenase, N-terminal domain protein	Paeniclostridium sordellii ATCC 9714	341	domain (3)
40	4	4	7.273	7.273	7.273	tr|T0E668|T0E668_CLOSO	Pyruvate formate lyase family protein OS=Paeniclostridium sordellii ATCC 9714 GN=H477_1816 PE=4 SV=1	CLOSO	2			lyase activity	ORF Names: H477_1816								Complete proteome; Lyase; Pyruvate; Reference proteome														predicted	IPR004184						T0E668	T0E668_CLOSO	not reviewed	MALFKKERDNGGTLDVDTKTVSAIDAYKPGYMDKEKEVIVGFQTDEPLKRAIMPYGGIRMVESSCKAYGFELDKDVKEIFTKYRKTHNQGVFDAYTDEMRAARRSGIITGLPDAYGRGRIIGDYRRVALYGVDRLIEDKISQKSSLDVSVIDEDTIRLREEISDQIKALEALKRMAESYGFDISRPANNSREAVQWLYFAYLGAIKDQNGAAMSLGRTSTFLDIYFERDLKNGEITEEEVQELMDHFVMKLRMVKFLRTPEYNDLFSGDPTWVTESIGGMGIDGRTLVTKNSFRVLHTLYTLGPSPEPNLTFYGQILYQKDLKTFALKFQ	Pyruvate formate lyase family protein	Paeniclostridium sordellii ATCC 9714	330	domain (1)
41	4	4	15.25	15.25	15.25	tr|T0DWI1|T0DWI1_CLOSO	Manganese containing catalase family protein OS=Paeniclostridium sordellii ATCC 9714 GN=H477_3485 PE=4 SV=1	CLOSO	2				ORF Names: H477_3485								Complete proteome; Reference proteome														predicted	IPR009078; IPR012347; IPR007760						T0DWI1	T0DWI1_CLOSO	not reviewed	MWIYQKTLEHPVNLKSKDLKMAKFLITQFGGPNGELAAAVRYLSQRFTMPTGKSKALLTDIGTEELAHVEMIASMVYQLTKDATPEELRKAGLGENYAQNGFGIFPSDAMEFLSQLVQ	Manganese containing catalase family protein	Paeniclostridium sordellii ATCC 9714	118
42	4	4	18.58	18.58	18.58	tr|T0D4U1|T0D4U1_CLOSO	50S ribosomal protein L17 OS=Paeniclostridium sordellii ATCC 9714 GN=rplQ PE=3 SV=1	CLOSO	2			ribosome; structural constituent of ribosome; translation	rplQ (orf: H477_0088)			Belongs to the ribosomal protein L17P family.					Complete proteome; Reference proteome; Ribonucleoprotein; Ribosomal protein														inferred from homology	IPR000456						T0D4U1	T0D4U1_CLOSO	not reviewed	MAKYRKLGRVTAHRNLMLRNLVTDLLRNGKIETTVTRAKETRRMAEKMITLAKRGDLHARRQVLAYVLDETVVNNLFTDIAPKYAERNGGYTRIIKIGPRRGDAAEMALIELV	50S ribosomal protein L17	Paeniclostridium sordellii ATCC 9714	113
43	4	4	8.621	8.621	8.621	tr|T0D3J0|T0D3J0_CLOSO	Pyruvate formate lyase family protein OS=Paeniclostridium sordellii ATCC 9714 GN=H477_0509 PE=4 SV=1	CLOSO	2			lyase activity	ORF Names: H477_0509								Coiled coil; Complete proteome; Lyase; Pyruvate; Reference proteome														predicted	IPR004184						T0D3J0	T0D3J0_CLOSO	not reviewed	MPFGGIRMVETSCDAYGYKLNPEISEIFTKYRKTHNQGVFDAYTPDMRAARSAGIITGLPDAYGRGRIIGDYRRVALYGVDKLIQDKLDQKATLEVRCIDEDVIRLREELSDQIKALEALKRMAESYGFDISKPATNAKEAVQWTYFGYLGAVKDQNGAAMSLGRVSTFLDIYFERDLAAGVLTEEEAQEIMDHFVMKLRMVRFLRTPEYNDLFSGDPTWVTESIGGMGLDGRTLVTKNSFRMLNTLYTLGPSPEPNLTVLWSTQLPEGFKNFCSKVSIDTSSVQTRTMI	Pyruvate formate lyase family protein	Paeniclostridium sordellii ATCC 9714	290	domain (1); coiled-coil region (1)
44	4	4	18.67	18.67	18.67	tr|T0CTM7|T0CTM7_CLOSO	Peptidase M20/M25/M40 family protein OS=Paeniclostridium sordellii ATCC 9714 GN=H477_0436 PE=4 SV=1	CLOSO	2			hydrolase activity; proteolysis	ORF Names: H477_0436								Complete proteome; Reference proteome														predicted	IPR002933; IPR001160						T0CTM7	T0CTM7_CLOSO	not reviewed	MNNVLSDLQPSLVFKYFEEISQIPRGSKNEKAISDYLRNFGEGLGLETIQDESLNIIIRKPATPGYENAPGVVLQGHMDMVCEKNKSTNHDFMKDPIELRIDGDYVYANNTTLGADNGIAVAMGLAILASNDIPHPALEVLLTVDEEAGMTGAMALDGSLIKENTY	Peptidase M20/M25/M40 family protein	Paeniclostridium sordellii ATCC 9714	166
45	4	4	11.86	11.86	11.86	tr|T0CMP1|T0CMP1_CLOSO	Hsp70 family protein OS=Paeniclostridium sordellii ATCC 9714 GN=H477_2995 PE=4 SV=1	CLOSO	2				ORF Names: H477_2995								Coiled coil; Complete proteome; Reference proteome														predicted	IPR029048; IPR029047; IPR013126						T0CMP1	T0CMP1_CLOSO	not reviewed	MGNVMTKIIDRNTTIPTKKSQVFSTAADNQTAVDIHVLQGERSMSYDNTTLGRFQLTDIPPAPRGIPQIEVTFDIDANGIVHVTAKDLGTGKEQKVTITSGTNLSEEEIQQKVKEAEMNAEADKQKKDKIEAVNQTEATIYQMEKTLKEAGDKVDPGAKSEVEAEIVKLKELKDRENVTAEELNKAMEELNNKFHKIAEQMYQQTQQEQAQGGAQEEAKQDDNVVDADFREVDDQK	Hsp70 family protein	Paeniclostridium sordellii ATCC 9714	236	coiled-coil region (2)
46	4	4	20.83	20.83	20.83	tr|T0CMC2|T0CMC2_CLOSO	Rubrerythrin-1 OS=Paeniclostridium sordellii ATCC 9714 GN=H477_1418 PE=4 SV=1	CLOSO	2			metal ion binding; NADH peroxidase activity	ORF Names: H477_1418			Contains 1 ferritin-like diiron domain.					Complete proteome; Oxidoreductase; Peroxidase; Reference proteome														predicted	IPR009040; IPR009078; IPR012347; IPR003251						T0CMC2	T0CMC2_CLOSO	not reviewed	MNLLKDSKTALNLMRAFAGESQARNRYTFGESLAKKQNFEAIRQVFNYTANQEKAHAWIFYNHLKDLSGESITVDGGYPVEVYTDLVTTLKSAQHNEYEEWDKVYKEFGQIAREEGFINVATSFEKIAEIEKVHGEDLVSLQID	Rubrerythrin-1	Paeniclostridium sordellii ATCC 9714	144	domain (1)
47	4	4	10.73	10.73	10.73	tr|T0CM84|T0CM84_CLOSO	Tryptophanase 2 OS=Paeniclostridium sordellii ATCC 9714 GN=tnaA2 PE=4 SV=1	CLOSO	2			tryptophanase activity; cellular amino acid metabolic process	tnaA2 (orf: H477_3251)								Complete proteome; Lyase; Reference proteome														predicted	IPR001597; IPR015424; IPR015421; IPR015422						T0CM84	T0CM84_CLOSO	not reviewed	MPEALDTVKYAPFKGNMDVARMENLINEFGPENVGVIIMTVTNNTAGGQPVSMKNMRETYKVAKKYNIPVLIDAARYAENAYFIKTREVGYEDKTIKEIVREMFSYGDMMTMSSKKDAIVNMGGLIGIKDDEELYDNIKARTISFEGFVSYGGLAGRDLEALAVGLYEGIDYDYLRYRIGQMEYIANRLDEAEIAYQSPVGGHAIFIDAKKLLPHIPYYQFPAQALAIELYKEAGIRSCDIGSYMLDNDPVTGEQRQSELELTRLAVPRRVYTQAHLDVIVDALISIKERASEINGYEITWQPKVLRHFTSKLKPVK	Tryptophanase 2	Paeniclostridium sordellii ATCC 9714	317	domain (1)
48	4	4	10.89	10.89	10.89	tr|T0CFX2|T0CFX2_CLOSO	Elongation factor Ts OS=Paeniclostridium sordellii ATCC 9714 GN=tsf PE=3 SV=1	CLOSO	2			cytoplasm; translation elongation factor activity	tsf (orf: H477_2726)			Belongs to the EF-Ts family.	Cytoplasm.	Associates with the EF-Tu.GDP complex and induces the exchange of GDP to GTP. It remains bound to the aminoacyl-tRNA.EF-Tu.GTP complex up to the GTP hydrolysis stage on the ribosome.			Complete proteome; Cytoplasm; Elongation factor; Protein biosynthesis; Reference proteome														inferred from homology	IPR001816; IPR014039						T0CFX2	T0CFX2_CLOSO	not reviewed	MALATEKEDVAGLLTEAHREGVLSEVLNNRIATIGEKLDIRRFAKISTNGQVAGYIHGGGKIGVLVELETEARDAEVLAMGRDIAMQVAAMNPKYVSKDDVDPEYIAHETEILTQQALNEGKPANIVEKMIKGRLDKQLKEVCLVEQAFVKNPDLTIKQLVADVAKKVGSDIKVARVVRFEVGEGIEKKEENFAEEVAKQLK	Elongation factor Ts	Paeniclostridium sordellii ATCC 9714	202	domain (1)
49	4	4	69.35	69.35	69.35	tr|T0CFK2|T0CFK2_CLOSO	Putative membrane protein OS=Paeniclostridium sordellii ATCC 9714 GN=H477_2616 PE=4 SV=1	CLOSO	3			integral component of membrane	ORF Names: H477_2616								Complete proteome; Membrane; Reference proteome; Signal; Transmembrane; Transmembrane helix					1 22									predicted							T0CFK2	T0CFK2_CLOSO	not reviewed	MKKGMVPIVLGAAVTTAGLALDAKQNKNHKFKKNDYKNMAGALLVGAGVAHIALGSIDRARY	Putative membrane protein	Paeniclostridium sordellii ATCC 9714	62	signal peptide (1); chain (1); transmembrane region (1)
50	2	6	21.55	21.55	21.55	tr|T0D302|T0D302_CLOSO	Reverse rubrerythrin-1 OS=Paeniclostridium sordellii ATCC 9714 GN=H477_0313 PE=4 SV=1	CLOSO	4			iron ion binding; NADH peroxidase activity	ORF Names: H477_0313			Contains 1 ferritin-like diiron domain.					Complete proteome; Oxidoreductase; Peroxidase; Reference proteome														predicted	IPR009040; IPR009078; IPR012347; IPR024934; IPR004039; IPR003251						T0D302	T0D302_CLOSO	not reviewed	MKKFVCTICGYIHEGEMPPEVCPVCKAPASKFEELKGERIWADEHRIGVAQGVDPEILEGLRANFTGECTEVGMYLAMSRQADREGFPEVAEAYKRIAFEEAEHAAKFAELLGEVVVADTKANLKARVEAEYGATDGKLKLAKRAKELGLDAIHDTVHEMCKDEARHGKAFLGLLNRHFEN	Reverse rubrerythrin-1	Paeniclostridium sordellii ATCC 9714	181	domain (2)
51	2	2	7.639	7.639	7.639	tr|T2RGS3|T2RGS3_CLOSO	Uncharacterized protein OS=Paeniclostridium sordellii ATCC 9714 GN=H477_3966 PE=4 SV=1	CLOSO	2				ORF Names: H477_3966								Complete proteome; Reference proteome														predicted							T2RGS3	T2RGS3_CLOSO	not reviewed	MHKKCDNKYCNINQCSSKYHYCDTFNEPEPVTPKFFFYPCEIDLYNNLKNCLCKTVGFKLSCSDCILRLKIMKVTPCSVYGKTSSGKGPICLKLSAIDYVDFGKEVYVNPLCNVNISEILTLPGSKGEKGEPGPQGPKGGFSRS	Uncharacterized protein	Paeniclostridium sordellii ATCC 9714	144
52	2	2	15.58	15.58	15.58	tr|T2RF26|T2RF26_CLOSO	Carbon monoxide dehydrogenase, catalytic subunit domain protein OS=Paeniclostridium sordellii ATCC 9714 GN=cooS2 PE=4 SV=1	CLOSO	1			carbon-monoxide dehydrogenase (acceptor) activity	cooS2 (orf: H477_4441)								Complete proteome; Oxidoreductase; Reference proteome														predicted	IPR011254						T2RF26	T2RF26_CLOSO	not reviewed	MSETIRERLEGRVSYHDSVEEMLKRIQTDGLSSVFSRWDPQEKMRCKFCLQGLSCQLCTHGPCRIMKKQELIKEFVV	Carbon monoxide dehydrogenase, catalytic subunit domain protein	Paeniclostridium sordellii ATCC 9714	77
53	2	2	7.483	7.483	7.483	tr|T2REG4|T2REG4_CLOSO	N-acetylneuraminate lyase OS=Paeniclostridium sordellii ATCC 9714 GN=nanA PE=4 SV=1	CLOSO	1			N-acetylneuraminate lyase activity; metabolic process	nanA (orf: H477_4503)								Complete proteome; Lyase; Reference proteome														predicted	IPR013785; IPR002220						T2REG4	T2REG4_CLOSO	not reviewed	MSLDQFGELFENEKIIGVKFTAADFYLLERMRKRFPDKLIYAGFDEMMLPATVLGVDGAIGSTFNVNGVRARQIFELAKEGKIKEALEIQHVTNDLITDILNNGLYQTIKAILEEQGVEAGYCRQPMKEATEEMIAKAKEMNKKYFQ	N-acetylneuraminate lyase	Paeniclostridium sordellii ATCC 9714	147
54	2	2	20	20	20	tr|T2RDY8|T2RDY8_CLOSO	DNA-binding protein HU OS=Paeniclostridium sordellii ATCC 9714 GN=hup PE=3 SV=1	CLOSO	1			DNA binding; chromosome condensation	hup (orf: H477_4910)			Belongs to the bacterial histone-like protein family.		Histone-like DNA-binding protein which is capable of wrapping DNA to stabilize it, and thus to prevent its denaturation under extreme environmental conditions.			Complete proteome; DNA condensation; DNA-binding; Reference proteome														inferred from homology	IPR000119; IPR020816; IPR010992						T2RDY8	T2RDY8_CLOSO	not reviewed	MAEKSELTKKEAELALNAFMKSVEEALVEGEKVQLVGFGTFETRERAARQGRNPRTQKKL	DNA-binding protein HU	Paeniclostridium sordellii ATCC 9714	60
55	2	2	24.69	24.69	24.69	tr|T2RDV5|T2RDV5_CLOSO	D-proline reductase subunit gamma domain protein OS=Paeniclostridium sordellii ATCC 9714 GN=H477_4646 PE=4 SV=1	CLOSO	1			D-proline reductase (dithiol) activity	ORF Names: H477_4646								Complete proteome; Oxidoreductase; Reference proteome														predicted							T2RDV5	T2RDV5_CLOSO	not reviewed	MQRAIEEAGIPTIIISALPPVVRQNGTPRAVAPLVPMGANAGEPNNIEMQTNILRDTLEQLIKIPSAGKIVQLPYEYVAQV	D-proline reductase subunit gamma domain protein	Paeniclostridium sordellii ATCC 9714	81
56	2	2	6.667	6.667	6.667	tr|T2RDD7|T2RDD7_CLOSO	D-proline reductase subunit gamma OS=Paeniclostridium sordellii ATCC 9714 GN=H477_4647 PE=4 SV=1	CLOSO	1			D-proline reductase (dithiol) activity	ORF Names: H477_4647								Complete proteome; Oxidoreductase; Reference proteome														predicted	IPR010187						T2RDD7	T2RDD7_CLOSO	not reviewed	MSLTTIKGLQSEIFVPITPPPVWTPVTKELKDMTIALATAAGVHLKSDKRFNLAGDFTYREIPDKATTDEMMVSHGGYDNADVNKDINCMFPIDRLHELAKAGFIKSVAPVHIGFMGGGGDQTKFTEETGPAIAQRLKDEGVDGVVLTAG	D-proline reductase subunit gamma	Paeniclostridium sordellii ATCC 9714	150
57	2	2	5.952	5.952	5.952	tr|T0EB97|T0EB97_CLOSO	CO dehydrogenase/acetyl-CoA synthase complex beta subunit OS=Paeniclostridium sordellii ATCC 9714 GN=H477_0479 PE=4 SV=1	CLOSO	1			carbon-monoxide dehydrogenase (acceptor) activity; acetyl-CoA metabolic process	ORF Names: H477_0479								Complete proteome; Reference proteome														predicted	IPR004461; IPR011254; IPR016099						T0EB97	T0EB97_CLOSO	not reviewed	MNNLGDLEAALEIIESLINKTHLLEHVFNSGLATALAAEVIEAIKYSTCDAPYSEPCAGHITDPIIRSLGVPLVTGDIPGVAVVLGECPDAETSAKIIKDYQSKGLLTFLVGKVIDQAIEAGVKMGLELRVIPLGYDVTSVIHVVSVAVRAALIFGNLTPGDLEGLLTYTAKRVPAFVNAFGPLSDLVVSCGAGAIALGFPVITDQDVLEVPMNLLTQKDYDKFVATSLEARGIKIKVTEIPIPVSFAAAFEGERIRKNDMYAEFGGNKTEAWELVRKREISEVEDHKIEIIGKDIDEIDAVNGVVRLPLAVIVDIAGKNMQEDFEPVLERRYTTS	CO dehydrogenase/acetyl-CoA synthase complex beta subunit	Paeniclostridium sordellii ATCC 9714	336
58	2	2	11.82	11.82	11.82	tr|T0EB07|T0EB07_CLOSO	Electron transfer flavoFAD-binding domain protein OS=Paeniclostridium sordellii ATCC 9714 GN=H477_0359 PE=4 SV=1	CLOSO	1				ORF Names: H477_0359								Complete proteome; Reference proteome														predicted	IPR029035; IPR014731; IPR018206						T0EB07	T0EB07_CLOSO	not reviewed	MLKELADKLDGVVGASRAAVDAGWIDHSYQIGQTGTTVKPNLYIACGISGAIQHLAGMQSSDFIIAINKNETAPIFDIADYGIVGDVKEIVPLFIEKLDSVDDLIELVNV	Electron transfer flavoFAD-binding domain protein	Paeniclostridium sordellii ATCC 9714	110	domain (1)
59	2	2	16.35	16.35	16.35	tr|T0EAM6|T0EAM6_CLOSO	Thioredoxin OS=Paeniclostridium sordellii ATCC 9714 GN=H477_5406 PE=3 SV=1	CLOSO	1			cell; protein disulfide oxidoreductase activity; cell redox homeostasis; glycerol ether metabolic process	ORF Names: H477_5406			Belongs to the thioredoxin family.; Contains 1 thioredoxin domain.					Complete proteome; Reference proteome												30 33 Redox-active		inferred from homology	IPR005746; IPR012336; IPR017937; IPR013766						T0EAM6	T0EAM6_CLOSO	not reviewed	MTRIIETEEFKNEVENATETTIVDFFATWCGPCKMLSPVFEEIDKNVEEAKFLKVDIDKSLDLARRFEVTTVPTVIVFKDGKEADRLVGFIPKQKLEEMVKAHI	Thioredoxin	Paeniclostridium sordellii ATCC 9714	104	domain (1); disulfide bond (1)
60	2	2	14.93	14.93	14.93	tr|T0E9N3|T0E9N3_CLOSO	Propanediol utilization PduL family protein OS=Paeniclostridium sordellii ATCC 9714 GN=H477_1156 PE=4 SV=1	CLOSO	1			transferase activity, transferring acyl groups other than amino-acyl groups	ORF Names: H477_1156								Complete proteome; Reference proteome														predicted	IPR008300						T0E9N3	T0E9N3_CLOSO	not reviewed	MSLDDAAKFGVKDKQIVKVRTFGPRSIVFENVLVRANPNFALEMHVDVEEGNAAAVRNGDMVELIAE	Propanediol utilization PduL family protein	Paeniclostridium sordellii ATCC 9714	67
61	2	2	12.1	12.1	12.1	tr|T0E826|T0E826_CLOSO	S4 domain protein OS=Paeniclostridium sordellii ATCC 9714 GN=H477_0085 PE=4 SV=1	CLOSO	1			intracellular; rRNA binding	ORF Names: H477_0085								Complete proteome; Reference proteome														predicted	IPR022801; IPR018079; IPR002942						T0E826	T0E826_CLOSO	not reviewed	MPGIAGENLLSLLERRLDNVVYRMGLASSRKEARQLVRHGHFTLNGHKVDIPSLTVVNGDVIAVKETSKSSAKFKGLVESNSRIAPKWLDANLENMTASVVANPGREDIDLEIAEHLIIELYSK	S4 domain protein	Paeniclostridium sordellii ATCC 9714	124	domain (1)
62	2	2	12.1	12.1	12.1	tr|T0E7Z7|T0E7Z7_CLOSO	Ribosomal protein S3 OS=Paeniclostridium sordellii ATCC 9714 GN=H477_0060 PE=3 SV=1	CLOSO	1			small ribosomal subunit; structural constituent of ribosome; translation	ORF Names: H477_0060			Belongs to the ribosomal protein S3P family.					Complete proteome; Reference proteome; Ribonucleoprotein; Ribosomal protein														inferred from homology	IPR005704; IPR001351; IPR018280						T0E7Z7	T0E7Z7_CLOSO	not reviewed	MKQAIQRAMKSGVKGIKVSASGRLGGAEMARTEGYSEGNVPLQTLRSDIEYGFAEANTTYGKTGIKVWICNGEVLPTRNGVNPREDRRDNNRRDRRDNRRNDRRDNNRRNNRGPRPQRTENKQA	Ribosomal protein S3	Paeniclostridium sordellii ATCC 9714	124
63	2	2	3.436	3.436	3.436	tr|T0E6L4|T0E6L4_CLOSO	Asparagine--tRNA ligase OS=Paeniclostridium sordellii ATCC 9714 GN=asnS PE=4 SV=1	CLOSO	1			cytoplasm; asparagine-tRNA ligase activity; ATP binding; asparaginyl-tRNA aminoacylation	asnS (orf: H477_1967)								Complete proteome; Ligase; Reference proteome														predicted	IPR004364; IPR018150; IPR006195; IPR004522; IPR002312						T0E6L4	T0E6L4_CLOSO	not reviewed	MFRLTTMDLNNIPKTEEGAIDYSKDFFGKEANLTVSGQLNAEIMALAFRNVYTFGPTFRAENSFTQRHASEFWMIEPEIVFADLEDNMELAEDMIKYVISYVMENAPEEMEFFNSFVDKGLMDRLNNVVNSEFTRITYTKAVEMLQESGHDFEYPVQWGDDLQTEHERYLTEQVFKAPVFVTDYPKDIKAFYMRMNEDGKTVRAMDLLVPGVGEIVGGSQREERHDVLLERIKEMNLNEEDYWWYLELRKFGTATHSGFGLGFERIIMYMTGMANIRDVIPFPRTPKNAEF	Asparagine--tRNA ligase	Paeniclostridium sordellii ATCC 9714	291	domain (1)
64	2	2	22.58	22.58	22.58	tr|T0E5E2|T0E5E2_CLOSO	Uncharacterized protein OS=Paeniclostridium sordellii ATCC 9714 GN=H477_1526 PE=4 SV=1	CLOSO	3				ORF Names: H477_1526								Complete proteome; Reference proteome														predicted							T0E5E2	T0E5E2_CLOSO	not reviewed	MIHQLNQLELQNLRHLIGAHCTIEKKLNDYAQKCTDPELVQMLTKDAQDAKNSKENLMKFLG	Uncharacterized protein	Paeniclostridium sordellii ATCC 9714	62
65	2	2	3.324	3.324	3.324	tr|T0E528|T0E528_CLOSO	Putative amidase domain protein OS=Paeniclostridium sordellii ATCC 9714 GN=H477_1207 PE=4 SV=1	CLOSO	1				ORF Names: H477_1207								Complete proteome; Reference proteome														predicted	IPR024301						T0E528	T0E528_CLOSO	not reviewed	MVDIKTKYINIYNDKLNCTIEYPEIYIKEKDIFIQQINSRIKEDINIFIDMENDNFKIDKDKSNIFIDYKLHFNKNNIVSLSIIFSEIYRYKCLINYVKTYNFDLNKEQIINIQDLIKEKYIDNSITGKILNEYVDYMQNFYIEEGSINFVYSSYEIYNMNEIIEKEIKFKDIYNYLSEYTIQRIRGSKMRQLKEYNRNLAVEYARMWALYRNPKYKDYDPWGGDCTNYISQCIHAGGIPFDHEGKDELQKWYWYSDSSRTPSWTAADPFGRYILNNNNDNTQNKGIYAVIAEYNELELGDIIQLIYQGKAYHTMIVTEVILDDRNYLIDYLICQHTEDLLDFPLSEKIGERKYIKILGYY	Putative amidase domain protein	Paeniclostridium sordellii ATCC 9714	361	domain (1)
66	2	2	6.061	6.061	6.061	tr|T0E3Z3|T0E3Z3_CLOSO	Glycine/sarcosine/betaine reductase complex component C subunit beta domain protein OS=Paeniclostridium sordellii ATCC 9714 GN=H477_0807 PE=4 SV=1	CLOSO	1			betaine reductase activity	ORF Names: H477_0807								Complete proteome; Oxidoreductase; Reference proteome														predicted							T0E3Z3	T0E3Z3_CLOSO	not reviewed	MVVAGGASAKLGMNAKDHVKKGLPVLEDVVGGFAILVSENDGVNPIIRTDLTGKHTVGTGSSPQAVMTALITTGLDRANLKITDVDVYSVEMQNPDITKPAGAGDVPEANYKMIGALAVKRGDLEKKELKNFVSERGIPGWAPTQGHIPSGVPYIGFCIDDLTNGDKNRAMIVGKGSLFLGRMTNLFDGVSFIVERNQGVEEEAAAVSKEEIKKIIAESMRKLAQDMLIEE	Glycine/sarcosine/betaine reductase complex component C subunit beta domain protein	Paeniclostridium sordellii ATCC 9714	231
67	2	2	10.53	10.53	10.53	tr|T0E1S4|T0E1S4_CLOSO	Cupin domain protein OS=Paeniclostridium sordellii ATCC 9714 GN=H477_1872 PE=4 SV=1	CLOSO	1				ORF Names: H477_1872								Complete proteome; Reference proteome														predicted	IPR013096; IPR014710; IPR011051						T0E1S4	T0E1S4_CLOSO	not reviewed	MEIMKHLLNGSIEQYNDSVVPKIPVFAGEDITSEVYYFKPGQVLKAHRHPNGEQVFFFLKGNGKMSVEEETFDVNEGSTIFVKAGKWHEITNGISEMVAVQVTKVGAGAEYKEN	Cupin domain protein	Paeniclostridium sordellii ATCC 9714	114	domain (1)
68	2	2	21.95	21.95	21.95	tr|T0E0R1|T0E0R1_CLOSO	Coat F domain protein OS=Paeniclostridium sordellii ATCC 9714 GN=H477_1527 PE=4 SV=1	CLOSO	1				ORF Names: H477_1527								Complete proteome; Reference proteome														predicted	IPR012851						T0E0R1	T0E0R1_CLOSO	not reviewed	MQEKEMISDYLSSINASLAGYGGIIAQTENEQLRKTLQDMRDQDEIRQYNLFKKAKEKGYYIPAQPAAESEVSIVKQQLSQG	Coat F domain protein	Paeniclostridium sordellii ATCC 9714	82
69	2	2	4.104	4.104	4.104	tr|T0DZF4|T0DZF4_CLOSO	M42 glutamyl aminopeptidase family protein OS=Paeniclostridium sordellii ATCC 9714 GN=H477_2794 PE=4 SV=1	CLOSO	1			aminopeptidase activity	ORF Names: H477_2794								Aminopeptidase; Complete proteome; Hydrolase; Protease; Reference proteome														predicted	IPR008007; IPR023367						T0DZF4	T0DZF4_CLOSO	not reviewed	MVKEIKSNGRLALTQVGGYMMTSIEGECCKIHTRNGKAYEGTIQTIKPSVHIHSDCRELPRVPANYEVVIDEQVCSKEDTEELGIEVGDFISFDPRVKITDSGFIKSRHLDDKASVAAALYVIEYLKVVGIKPKHTVNFFFSNYEEVGHGSSAAIPENTKEFIAIDMGCPGEGQNSTEYDVCICAKDSGGPYDYELTSKLIDIAKNNNIGYKVDTYPNYGSDAGAMLKAGYDVKTALIGAGIFASHGYERTNLQSIIETIKLVTEYVK	M42 glutamyl aminopeptidase family protein	Paeniclostridium sordellii ATCC 9714	268
70	2	2	17.39	17.39	17.39	tr|T0DXH0|T0DXH0_CLOSO	Peptidase M20/M25/M40 family protein OS=Paeniclostridium sordellii ATCC 9714 GN=H477_3179 PE=4 SV=1	CLOSO	1				ORF Names: H477_3179								Complete proteome; Reference proteome														predicted							T0DXH0	T0DXH0_CLOSO	not reviewed	MKETGITPIIVPIRGGTDGARLSFMGLPCPNIFTGGLNFHSKNECIPVSAMEKGAKLIVKIAEKYTNLK	Peptidase M20/M25/M40 family protein	Paeniclostridium sordellii ATCC 9714	69
71	2	2	4.598	4.598	4.598	tr|T0DS30|T0DS30_CLOSO	M18 family aminopeptidase OS=Paeniclostridium sordellii ATCC 9714 GN=H477_3135 PE=3 SV=1	CLOSO	1			aminopeptidase activity; metallopeptidase activity; zinc ion binding	ORF Names: H477_3135			Belongs to the peptidase M18 family.					Aminopeptidase; Complete proteome; Hydrolase; Metal-binding; Metalloprotease; Protease; Reference proteome; Zinc														inferred from homology	IPR001948						T0DS30	T0DS30_CLOSO	not reviewed	MPLEGEEKDAISANVLKLLNDKYNMTEKDFLTAEIEIVPSGKARHLGFDKSMIISYGHDDRVCSYAAVKSIFDIEKPKYTAVALCVDKEEVGSQGNTGMHSKFFENTVAELINLEGNYCELKVRRAMANSKVLSADVSAGFDPTYPDVLDKRNACFMGHGIALTKYTGVRGKGGCNDANAEFASEVRRIFDKANVVWQISELGKVDQGGGGTIAYILAQYGAEVIDCGVGVLNMHAPYEIVSKADIYEMYKGYKAFYTIEA	M18 family aminopeptidase	Paeniclostridium sordellii ATCC 9714	261
72	2	2	7.345	7.345	7.345	tr|T0D6Z2|T0D6Z2_CLOSO	Uncharacterized protein OS=Paeniclostridium sordellii ATCC 9714 GN=H477_5615 PE=4 SV=1	CLOSO	1				ORF Names: H477_5615								Complete proteome; Reference proteome														predicted							T0D6Z2	T0D6Z2_CLOSO	not reviewed	MALTCNKSTELDFSATFNVPKEFQYLDGDNFSIAISTENLTAYKNIIEETIPSAKVICDKTVENLKVKVAQVNVSGYIYFRVAVDGIQSDELIIDPSIPNVTIDPAWSSTDGIVAVEDQNGNKFMTIAYIPVDQELPTTPFKVYLENIELGNVNRDPQSDNITVRVDGKFKIVYMPQ	Uncharacterized protein	Paeniclostridium sordellii ATCC 9714	177
73	2	2	8.021	8.021	8.021	tr|T0D688|T0D688_CLOSO	tRNA synthetases class I (E and Q), catalytic domain protein OS=Paeniclostridium sordellii ATCC 9714 GN=H477_5762 PE=3 SV=1	CLOSO	1			cytoplasm; aminoacyl-tRNA ligase activity; ATP binding; translation; tRNA aminoacylation	ORF Names: H477_5762			Belongs to the class-I aminoacyl-tRNA synthetase family.					Aminoacyl-tRNA synthetase; ATP-binding; Complete proteome; Ligase; Nucleotide-binding; Protein biosynthesis; Reference proteome														inferred from homology	IPR000924; IPR020058; IPR014729						T0D688	T0D688_CLOSO	not reviewed	MSVRVRFAPSPTGFVHIGSLRTALYNYLFAKRMGGEYILRVEDTDRTRIVDGAIENMLEAMAWAGVNHTEGVVLGENKEITQVGEYGPYIQSERLDIYKDYIQQLLDNGKAYYCFCSKERLDEVREKQKEAGETPKYDGNCRNLSKEEVEAKLAAGEEYVIRLKLPENHVIKFTDLVRGETDLILMN	tRNA synthetases class I (E and Q), catalytic domain protein	Paeniclostridium sordellii ATCC 9714	187	domain (1)
74	2	2	9.639	9.639	9.639	tr|T0D4W8|T0D4W8_CLOSO	30S ribosomal protein S7 OS=Paeniclostridium sordellii ATCC 9714 GN=rpsG PE=3 SV=1	CLOSO	1			small ribosomal subunit; rRNA binding; structural constituent of ribosome; tRNA binding; translation	rpsG (orf: H477_0046)			Belongs to the ribosomal protein S7P family.		One of the primary rRNA binding proteins, it binds directly to 16S rRNA where it nucleates assembly of the head domain of the 30S subunit. Is located at the subunit interface close to the decoding center, probably blocks exit of the E-site tRNA.			Complete proteome; Reference proteome; Ribonucleoprotein; Ribosomal protein; RNA-binding; rRNA-binding; tRNA-binding														inferred from homology	IPR000235; IPR005717; IPR020606; IPR023798						T0D4W8	T0D4W8_CLOSO	not reviewed	MPRKGNVPKREVLPDPVYGSKVVTKLINNLMIDGKKGKSQKIVYDAFEMIAEKTGENALEIFETAMENIMPVLEVKARRVGGANYQVPVEVRPERRQTLGLRWLVNYTRARGEKGMVEKLAKEKWMLLTIQELLLRRKKILIRWQKLIKHLLTIDSNNRIDLISYY	30S ribosomal protein S7	Paeniclostridium sordellii ATCC 9714	166	domain (1)
75	2	2	3.692	3.692	3.692	tr|T0D4W3|T0D4W3_CLOSO	DNA-directed RNA polymerase subunit OS=Paeniclostridium sordellii ATCC 9714 GN=H477_0041 PE=3 SV=1	CLOSO	1			DNA binding; DNA-directed RNA polymerase activity; transcription, DNA-templated	ORF Names: H477_0041			Belongs to the RNA polymerase beta' chain family.		DNA-dependent RNA polymerase catalyzes the transcription of DNA into RNA using the four ribonucleoside triphosphates as substrates.			Complete proteome; DNA-directed RNA polymerase; Nucleotidyltransferase; Reference proteome; Transcription; Transferase														inferred from homology	IPR000722; IPR006592; IPR007080; IPR007066						T0D4W3	T0D4W3_CLOSO	not reviewed	MILDAIPVIPPDLRPMVQLDGGRFATSDLNDLYRRVINRNNRLKRLLELGAPDIIVRNEKRMLQEAVDALIDNGRRGRPVTGPGNRPLKSLSDMLKGKQGRFRQNLLGKRVDYSGRSVIVVGPELKFYQCGLPKKMALELFKPFVMDRLVKEGYAHNIKSAKSIVEKVKPEVWDVLEDVIEGHPVMLNRAPTLHRLGIQAFEPVLVEGKAIKLHPLVCTAYNADFDGDQMAVHVPLSVEAQAEARFLMLSVNNILAPKDGSPITTPSQDMVLGCYYLTIEAQEGAKGTGMIFKDYNEMMLAYENKAVTLHSLVKVRRTVEGVELN	DNA-directed RNA polymerase subunit	Paeniclostridium sordellii ATCC 9714	325	domain (1)
76	2	2	15	15	15	tr|T0D4V2|T0D4V2_CLOSO	Ribosomal L1p/L10e family protein OS=Paeniclostridium sordellii ATCC 9714 GN=H477_0031 PE=4 SV=1	CLOSO	1			RNA binding	ORF Names: H477_0031								Complete proteome; Reference proteome														predicted	IPR023674; IPR028364; IPR016094; IPR016095						T0D4V2	T0D4V2_CLOSO	not reviewed	MAKKGKKYVEALNKIDRTRLYDASEALNLVAEVASAKFDETVEAHIKLGVDSRHADQQVRGAVVLPHGTGKTKRVLVFAKGAKAEEATNAGADFVGAEDLVQKIQGENWFEFDVLLLLQT	Ribosomal L1p/L10e family protein	Paeniclostridium sordellii ATCC 9714	120
77	2	2	13.48	13.48	13.48	tr|T0D4D9|T0D4D9_CLOSO	50S ribosomal protein L11 OS=Paeniclostridium sordellii ATCC 9714 GN=rplK PE=3 SV=1	CLOSO	1			ribosome; large ribosomal subunit rRNA binding; structural constituent of ribosome; translation	rplK (orf: H477_0030)			Belongs to the ribosomal protein L11P family.		Forms part of the ribosomal stalk which helps the ribosome interact with GTP-bound translation factors.			Complete proteome; Methylation; Reference proteome; Ribonucleoprotein; Ribosomal protein; RNA-binding; rRNA-binding														inferred from homology	IPR000911; IPR006519; IPR020783; IPR020785; IPR020784		One or more lysine residues are methylated.				T0D4D9	T0D4D9_CLOSO	not reviewed	MAKKVIGQIKLQIPAGKATPAPPVGPALGQHGVNIMGFTKEFNAKTADQAGMIIPVVITVYQDRSFSFITKTPPAAVLLKKAAGLDTASGEPNKKKVATLSSAKIREIAELKMPDLNAASVESAMRMIAGTARSMGIVVED	50S ribosomal protein L11	Paeniclostridium sordellii ATCC 9714	141	domain (2)
78	2	2	18.64	18.64	18.64	tr|T0D113|T0D113_CLOSO	M16 family metallopeptidase domain protein OS=Paeniclostridium sordellii ATCC 9714 GN=H477_1139 PE=4 SV=1	CLOSO	1			hydrolase activity	ORF Names: H477_1139								Complete proteome; Hydrolase; Reference proteome														predicted							T0D113	T0D113_CLOSO	not reviewed	MEALTDNIGGLSDFKFAQDISKTNLSIEDIIDYIDKVTKEEIVDVFKALQLDTIYFLRN	M16 family metallopeptidase domain protein	Paeniclostridium sordellii ATCC 9714	59
79	2	2	4.179	4.179	4.179	tr|T0CZT3|T0CZT3_CLOSO	Branched-chain-amino-acid aminotransferase OS=Paeniclostridium sordellii ATCC 9714 GN=ilvE PE=3 SV=1	CLOSO	1			L-isoleucine transaminase activity; L-leucine transaminase activity; L-valine transaminase activity; isoleucine biosynthetic process; leucine biosynthetic process; valine biosynthetic process	ilvE (orf: H477_0714)	Amino-acid biosynthesis; L-isoleucine biosynthesis; L-isoleucine from 2-oxobutanoate: step 4/4.; Amino-acid biosynthesis; L-leucine biosynthesis; L-leucine from 3-methyl-2-oxobutanoate: step 4/4.; Amino-acid biosynthesis; L-valine biosynthesis; L-valine from pyruvate: step 4/4.		Belongs to the class-IV pyridoxal-phosphate-dependent aminotransferase family.					Amino-acid biosynthesis; Aminotransferase; Branched-chain amino acid biosynthesis; Complete proteome; Pyridoxal phosphate; Reference proteome; Transferase	184 N6-(pyridoxal phosphate)lysine													inferred from homology	IPR001544; IPR018300; IPR005786; IPR033939						T0CZT3	T0CZT3_CLOSO	not reviewed	MSKKDIKWSELGFSYIKTDKRYISRWKDGKWDDGILTEDNNITLNEGSTCLHYGQQCFEGLKAYTNKDGEIQLFRPDQNALRMQRSCKRLLMPEIPVDKFIDACKQVVKANEDYVPPYGTGATLYLRPYVIGVGENIGVKPANEYIFGVFCIPVGPYYKGGMAPVNYITTEYDRAAAHGTGRDKVGGNYAASLLAHKEAVEKGFADCIYLDPKTHTKIDEVGAANFFAITKDNKFVTPNSTSILPSITKASLLHVAKEYLNMETEIADVFIDKLDEYKEAGACGTAAVITPIGGIEHKGKMHVFYSQTEVGPVVKKLYDTLYGIQTGDVEAPEDG	Branched-chain-amino-acid aminotransferase	Paeniclostridium sordellii ATCC 9714	335	modified residue (1)
80	2	2	9.17	9.17	9.17	tr|T0CWL4|T0CWL4_CLOSO	Serine--tRNA ligase OS=Paeniclostridium sordellii ATCC 9714 GN=serS PE=4 SV=1	CLOSO	1			cytoplasm; ATP binding; serine-tRNA ligase activity; seryl-tRNA aminoacylation	serS (orf: H477_5779)								Complete proteome; Ligase; Reference proteome														predicted	IPR002314; IPR006195; IPR002317; IPR033729						T0CWL4	T0CWL4_CLOSO	not reviewed	MANRASFIGTGQLPKFEEDMFKLEGLDYFLIPTAEVPVTNIHRDEILSVDELPIKYCAYTPCFRSEAGSAGRDTRGLVRQHQFNKVELVKFVKPEESYEELEKLTNDAETMLQMLGLPYRVVRICTGDLGFTAAFKYDLEVWMPSYNRYVEISSCSNFEDFQARRAGIRFKRDKKAKAEYVHTLNGSGLAVGRCLAAILENYQQPDGSVVVPEVLRPYMGVDVIKKGEL	Serine--tRNA ligase	Paeniclostridium sordellii ATCC 9714	229	domain (1)
81	2	2	16	16	16	tr|T0CW34|T0CW34_CLOSO	Uncharacterized protein OS=Paeniclostridium sordellii ATCC 9714 GN=H477_1359 PE=4 SV=1	CLOSO	1				ORF Names: H477_1359								Complete proteome; Reference proteome														predicted							T0CW34	T0CW34_CLOSO	not reviewed	MEMNTQDCLKKALLDTQEKVRDFMAYADVIEDKELSKCFREFAKVEGLQAQKLQEHIVMFFIYLLKYYFNKSIQK	Uncharacterized protein	Paeniclostridium sordellii ATCC 9714	75
82	2	2	3.704	3.704	3.704	tr|T0CTH0|T0CTH0_CLOSO	DNA polymerase A family protein OS=Paeniclostridium sordellii ATCC 9714 GN=H477_2490 PE=3 SV=1	CLOSO	1			DNA binding; DNA-directed DNA polymerase activity; DNA replication	ORF Names: H477_2490			Belongs to the DNA polymerase type-A family.					Complete proteome; Reference proteome														inferred from homology	IPR001098						T0CTH0	T0CTH0_CLOSO	not reviewed	MKKLKIITKVDNPKSNNQIKTYLKTMGIEVSSLNKESVENLLKSEEVLNHKKYEEIKEVLNLRSRLNKTSTKKYEAMKRCICSDDRIRGLFQFYGANRTGRWAGRLVQVQNLPQNKLENLEEVRSIIINNYGSELPSRDKYKKYTNKENYYNQNKSIKVNEDISSILSQLIRTTFIPKKNHRFIIADFSAIEARITSYIANEIWRLEVFNTHGKIYEASAAKMFKVDINKITKESELRQKGKIAELALGYQGGVGALVTMGAYNMNLCEDELIEIVKAFRSSNTNIVSYGKKQRKLL	DNA polymerase A family protein	Paeniclostridium sordellii ATCC 9714	297	domain (1)
83	2	2	6.438	6.438	6.438	tr|T0CRP9|T0CRP9_CLOSO	Acetate kinase OS=Paeniclostridium sordellii ATCC 9714 GN=ackA PE=3 SV=1	CLOSO	1			cytoplasm; acetate kinase activity; ATP binding; magnesium ion binding; acetyl-CoA biosynthetic process; organic acid metabolic process	ackA (orf: H477_1003)	Metabolic intermediate biosynthesis; acetyl-CoA biosynthesis; acetyl-CoA from acetate: step 1/2.		Belongs to the acetokinase family.	Cytoplasm.	Catalyzes the formation of acetyl phosphate from acetate and ATP. Can also catalyze the reverse reaction.			ATP-binding; Complete proteome; Cytoplasm; Kinase; Magnesium; Metal-binding; Nucleotide-binding; Reference proteome; Transferase														inferred from homology	IPR004372; IPR000890; IPR023865				149 Proton donor/acceptor	14 ATP; 92 Substrate	T0CRP9	T0CRP9_CLOSO	not reviewed	MKVLVLNCGSSSLKYQLIDMANEEVLCIGLVERIGIEGSILKQEKDGVEGKLVVEQPMKNHQDAIKLVLEGVVHPEFGGVKEISEVEAVGHRVVHGGEKFAKSVKINGEVMAALEECVELAPLHNPANIMGIEACEAILPGVPMVAVFDTAFHQTMPKKSYLYGLPHELYTKYGVRRYGFHGTSHKYVSQRAADMLGKNIEDVKIITCHLGNGASIAAVDGGKCVELQWDSLH	Acetate kinase (Acetokinase)	Paeniclostridium sordellii ATCC 9714	233	nucleotide phosphate-binding region (1); active site (1); metal ion-binding site (1); binding site (2); site (1)
84	2	2	13.86	13.86	13.86	tr|T0CR71|T0CR71_CLOSO	Uncharacterized protein OS=Paeniclostridium sordellii ATCC 9714 GN=H477_0853 PE=4 SV=1	CLOSO	1				ORF Names: H477_0853								Complete proteome; Reference proteome														predicted	IPR011437						T0CR71	T0CR71_CLOSO	not reviewed	MSNPISCSATSCTYNNSGGCFASGIQVTGTRATTTCETNCDTYQDRDSSSFTNSVQENDCARINSILCEAKNCKYNDSGACKAEAVKINMDDASCETFISR	Uncharacterized protein	Paeniclostridium sordellii ATCC 9714	101	domain (2)
85	2	2	10.71	10.71	10.71	tr|T0CMF5|T0CMF5_CLOSO	Uncharacterized protein OS=Paeniclostridium sordellii ATCC 9714 GN=H477_3326 PE=4 SV=1	CLOSO	1				ORF Names: H477_3326								Complete proteome; Reference proteome														predicted							T0CMF5	T0CMF5_CLOSO	not reviewed	MIKYESFGVKPCLYAATNGGNVQILKSTNGVNWFKLDSKNLKGSTSRAMTIHNGKLYLATVDQESDDISKLYKPLIYSSSDPELYGWDKIKIGTKKIKIQLDIFMEWYLLMESYMLPLLIMKVCKYGEQINLILKKMIGL	Uncharacterized protein	Paeniclostridium sordellii ATCC 9714	140
86	2	2	34.48	34.48	34.48	tr|T0CLW2|T0CLW2_CLOSO	Uncharacterized protein OS=Paeniclostridium sordellii ATCC 9714 GN=H477_3413 PE=4 SV=1	CLOSO	1				ORF Names: H477_3413								Complete proteome; Reference proteome														predicted	IPR009711						T0CLW2	T0CLW2_CLOSO	not reviewed	MQENIVNLIDQDGNEIQFEIILTLEAEGKEYAILMPLDDNEAEEALIFRIDSDEEGDI	Uncharacterized protein	Paeniclostridium sordellii ATCC 9714	58
87	2	2	9.735	9.735	9.735	RRRRRtr|T0D0D8|T0D0D8_CLOSO	REVERSED RecF/RecN/SMC N terminal domain protein OS=Paeniclostridium sordellii ATCC 9714 GN=H477_0899 PE=4 SV=1	CLOSO	1				ORF Names: H477_0899								Complete proteome; Reference proteome														predicted	IPR027417; IPR003395						T0D0D8	T0D0D8_CLOSO	not reviewed	MYLKRLELKGFKSFPTKTDVLFNEGITAIVGPNGSGKSNISDAVRWVLGEQSIKSLRGDKLEDVVFAGTDTKKAMNYCEVALTIDNSDKKLDLEYSEITIKRKLIEVEKVNFS	RecF/RecN/SMC N terminal domain protein	Paeniclostridium sordellii ATCC 9714	113	domain (1)
[truncated: 3 more columns]

## Sheet: Peptide Summary Rep 2
N	Unused	Total	%Cov	%Cov(50)	%Cov(95)	Accessions	Names	Used	Annotation	Contrib	Conf	Sequence	Modifications	ProteinModifications	Cleavages	dMass	Obs MW	Obs m/z	Theor MW	Theor m/z	Theor z	Sc	Spectrum	Acq Time	Intensity (Peptide)	PrecursorIntensityAcquisition	Apex Time (Peptide)	Elution Peak Width (Peptide)	MS2Counts
1	42	42	62.88	62.88	62.88	tr|T2RG98|T2RG98_CLOSO	Uncharacterized protein OS=Paeniclostridium sordellii ATCC 9714 GN=H477_4099 PE=4 SV=1			2	99	APQVFTVDPR			cleaved I-A@N-term; cleaved R-P@C-term	-0.00498131	1128.59	565.301	1128.59	565.304	2	16	1.1.1.3232.4	35.9781	110.43	101.64	35.9	0.25	22053.1
1	42	42	62.88	62.88	62.88	tr|T2RG98|T2RG98_CLOSO	Uncharacterized protein OS=Paeniclostridium sordellii ATCC 9714 GN=H477_4099 PE=4 SV=1			2	99	AQFDLKFVVKSIVPTTPFSGGTFSAR	Carbamyl(K)@6; Carbamyl(K)@10		missed K-F@6; missed K-S@10	0.0152225	2885.52	722.388	2885.51	722.384	4	16	1.1.1.3537.2	54.5335	25.56	20.01	54.25	0.53	6674.13
1	42	42	62.88	62.88	62.88	tr|T2RG98|T2RG98_CLOSO	Uncharacterized protein OS=Paeniclostridium sordellii ATCC 9714 GN=H477_4099 PE=4 SV=1			2	99	EKGSTATLVQGPLDASIYNFQYIVEGF	Carbamyl@N-term		cleaved F-I@C-term; missed K-G@2	0.0453431	2989.52	997.513	2989.47	997.498	3	33	1.1.1.3671.2	56.4258	37.57	36.55	56.44	0.42	18158.1
1	42	42	62.88	62.88	62.88	tr|T2RG98|T2RG98_CLOSO	Uncharacterized protein OS=Paeniclostridium sordellii ATCC 9714 GN=H477_4099 PE=4 SV=1			2	99	FPVTPSDAPDFLTNINLF			cleaved F-S@C-term	-0.00369492	2007	1004.5	2007	1004.51	2	23	1.1.1.3469.2	52.4711	82.07	50.47	53.04	1.14	13738.1
1	42	42	62.88	62.88	62.88	tr|T2RG98|T2RG98_CLOSO	Uncharacterized protein OS=Paeniclostridium sordellii ATCC 9714 GN=H477_4099 PE=4 SV=1			2	99	FVVKSIVPTTPF	Carbamyl(K)@4		cleaved F-S@C-term; missed K-S@4	-0.00476958	1376.77	689.39	1376.77	689.392	2	18	1.1.1.3327.2	44.763	889.53	750.87	44.84	0.21	30785.1
1	42	42	62.88	62.88	62.88	tr|T2RG98|T2RG98_CLOSO	Uncharacterized protein OS=Paeniclostridium sordellii ATCC 9714 GN=H477_4099 PE=4 SV=1			2	99	FVVKSIVPTTPFSGGTF	Carbamyl(K)@4		cleaved F-S@C-term; missed K-S@4	-0.000163137	1825.96	913.988	1825.96	913.988	2	26	1.1.1.3347.2	46.9254	147.34	139.56	47	0.34	34056.1
1	42	42	62.88	62.88	62.88	tr|T2RG98|T2RG98_CLOSO	Uncharacterized protein OS=Paeniclostridium sordellii ATCC 9714 GN=H477_4099 PE=4 SV=1			2	99	FVVKSIVPTTPFSGGTFSAR	Carbamidomethyl@N-term; Carbamyl(K)@4		missed K-S@4	-0.00217338	2197.15	733.391	2197.15	733.392	3	23	1.1.1.3318.4	43.8809	107.55	98.42	43.79	0.41	24606.1
1	42	42	62.88	62.88	62.88	tr|T2RG98|T2RG98_CLOSO	Uncharacterized protein OS=Paeniclostridium sordellii ATCC 9714 GN=H477_4099 PE=4 SV=1			2	99	IFDELLISEK				-0.000416583	1205.65	603.834	1205.65	603.834	2	17	1.1.1.3279.2	40.0008	2928.75	937.89	39.77	0.24	26425.1
1	42	42	62.88	62.88	62.88	tr|T2RG98|T2RG98_CLOSO	Uncharacterized protein OS=Paeniclostridium sordellii ATCC 9714 GN=H477_4099 PE=4 SV=1			2	99	IFDELLISEKLYLTK	Carbamyl(K)@10		missed K-L@10	-0.00408452	1867.03	623.351	1867.03	623.352	3	18	1.1.1.3362.4	48.6893	219.39	58.57	48.34	0.24	8802.07
1	42	42	62.88	62.88	62.88	tr|T2RG98|T2RG98_CLOSO	Uncharacterized protein OS=Paeniclostridium sordellii ATCC 9714 GN=H477_4099 PE=4 SV=1			2	99	IFDFKCVNQQIPR	Delta:H(2)C(2)(K)@5; Carbamidomethyl(C)@6		missed K-C@5	-0.0141516	1689.85	564.291	1689.87	564.296	3	21	1.1.1.3269.4	39.2428	126.18	97.84	39.13	0.28	23865.2
1	42	42	62.88	62.88	62.88	tr|T2RG98|T2RG98_CLOSO	Uncharacterized protein OS=Paeniclostridium sordellii ATCC 9714 GN=H477_4099 PE=4 SV=1			2	99	IVPTTPFSGGTFSAR			cleaved S-I@N-term	-0.000631958	1536.79	769.404	1536.79	769.404	2	17	1.1.1.3244.4	37.0213	225.67	204.72	36.96	0.26	33645
1	42	42	62.88	62.88	62.88	tr|T2RG98|T2RG98_CLOSO	Uncharacterized protein OS=Paeniclostridium sordellii ATCC 9714 GN=H477_4099 PE=4 SV=1			2	99	LYLTKSDALVVY	Carbamyl(K)@5		cleaved Y-S@C-term; missed K-S@5	0.00495763	1426.78	714.395	1426.77	714.393	2	16	1.1.1.3306.3	42.6179	369.37	337.59	42.67	0.3	29231.1
1	42	42	62.88	62.88	62.88	tr|T2RG98|T2RG98_CLOSO	Uncharacterized protein OS=Paeniclostridium sordellii ATCC 9714 GN=H477_4099 PE=4 SV=1			2	99	LYLTKSDALVVYSAPAEFK	Carbamyl(K)@5		missed K-S@5	0.000578024	2157.14	720.053	2157.14	720.053	3	18	1.1.1.3312.4	43.2563	110.87	107.65	43.17	0.61	27631.1
1	42	42	62.88	62.88	62.88	tr|T2RG98|T2RG98_CLOSO	Uncharacterized protein OS=Paeniclostridium sordellii ATCC 9714 GN=H477_4099 PE=4 SV=1			2	99	PQVFTVDPR			cleaved A-P@N-term; cleaved R-P@C-term	-0.00399927	1057.55	529.783	1057.56	529.785	2	15	1.1.1.3232.3	35.9426	137.4	131.41	35.9	0.25	24303.1
1	42	42	62.88	62.88	62.88	tr|T2RG98|T2RG98_CLOSO	Uncharacterized protein OS=Paeniclostridium sordellii ATCC 9714 GN=H477_4099 PE=4 SV=1			2	99	SDALVVYSAPAEFK				0.00339399	1495.76	748.887	1495.76	748.885	2	17	1.1.1.3246.2	37.1626	690	685.86	37.15	0.32	31411.1
1	42	42	62.88	62.88	62.88	tr|T2RG98|T2RG98_CLOSO	Uncharacterized protein OS=Paeniclostridium sordellii ATCC 9714 GN=H477_4099 PE=4 SV=1			2	99	SDALVVYSAPAEFKHHEK	Malonyl(K)@14	Malonyl(K)@225	missed K-H@14	0.0185163	2113.03	705.351	2113.01	705.344	3	21	1.1.1.3235.2	36.1678	764.15	612.46	36.26	0.27	38643.1
1	42	42	62.88	62.88	62.88	tr|T2RG98|T2RG98_CLOSO	Uncharacterized protein OS=Paeniclostridium sordellii ATCC 9714 GN=H477_4099 PE=4 SV=1			2	99	SIAPQVFTVDPR			cleaved R-P@C-term	0.00103312	1328.71	665.362	1328.71	665.362	2	17	1.1.1.3231.2	35.8254	7385.31	5408.74	35.9	0.18	53888.1
1	42	42	62.88	62.88	62.88	tr|T2RG98|T2RG98_CLOSO	Uncharacterized protein OS=Paeniclostridium sordellii ATCC 9714 GN=H477_4099 PE=4 SV=1			2	99	SIVPTTPF			cleaved F-S@C-term	0.0018151	860.466	431.24	860.464	431.239	2	12	1.1.1.3262.3	38.5843	123.43	113.24	38.53	0.17	18165.1
1	42	42	62.88	62.88	62.88	tr|T2RG98|T2RG98_CLOSO	Uncharacterized protein OS=Paeniclostridium sordellii ATCC 9714 GN=H477_4099 PE=4 SV=1			2	99	SIVPTTPFSGGTF			cleaved F-S@C-term	0.00344046	1309.66	655.837	1309.66	655.835	2	21	1.1.1.3304.3	42.4253	193.23	180.71	42.36	0.22	25379.1
1	42	42	62.88	62.88	62.88	tr|T2RG98|T2RG98_CLOSO	Uncharacterized protein OS=Paeniclostridium sordellii ATCC 9714 GN=H477_4099 PE=4 SV=1			2	99	SIVPTTPFSGGTFSAR				0.00187372	1623.83	812.921	1623.83	812.92	2	26	1.1.1.3261.4	38.5076	1417.75	969.95	38.62	0.18	36345.1
1	42	42	62.88	62.88	62.88	tr|T2RG98|T2RG98_CLOSO	Uncharacterized protein OS=Paeniclostridium sordellii ATCC 9714 GN=H477_4099 PE=4 SV=1			2	99	STICLPNTDDPLTLR	Carbamidomethyl(C)@4		cleaved F-S@N-term	0.00471452	1714.86	858.438	1714.86	858.435	2	25	1.1.1.3266.4	38.9636	264.09	258.01	38.96	0.14	39456.1
1	42	42	62.88	62.88	62.88	tr|T2RG98|T2RG98_CLOSO	Uncharacterized protein OS=Paeniclostridium sordellii ATCC 9714 GN=H477_4099 PE=4 SV=1			0	99	AQFDLKFVVKSIVPTTPFSGGTFSAR	Carbamyl(K)@6; Carbamyl(K)@10		missed K-F@6; missed K-S@10	0.0151678	2885.52	962.848	2885.51	962.843	3	29	1.1.1.3535.2	54.3697	50.16	49.12	54.35	0.63	15427.1
1	42	42	62.88	62.88	62.88	tr|T2RG98|T2RG98_CLOSO	Uncharacterized protein OS=Paeniclostridium sordellii ATCC 9714 GN=H477_4099 PE=4 SV=1			0	99	AQFDLKFVVKSIVPTTPFSGGTFSAR	Carbamyl@N-term; Carbamyl(K)@10		missed K-F@6; missed K-S@10	0.0152225	2885.52	722.388	2885.51	722.384	4	16	1.1.1.3535.4	54.4408	25.56	23.17	54.25	0.53	5716.01
1	42	42	62.88	62.88	62.88	tr|T2RG98|T2RG98_CLOSO	Uncharacterized protein OS=Paeniclostridium sordellii ATCC 9714 GN=H477_4099 PE=4 SV=1			0	99	FPVTPSDAPDFLTNINLF			cleaved F-S@C-term	-0.00369492	2007	1004.5	2007	1004.51	2	23	1.1.1.3480.2	52.8062	82.07	69.06	53.04	1.14	22611.1
1	42	42	62.88	62.88	62.88	tr|T2RG98|T2RG98_CLOSO	Uncharacterized protein OS=Paeniclostridium sordellii ATCC 9714 GN=H477_4099 PE=4 SV=1			0	99	FPVTPSDAPDFLTNINLF			cleaved F-S@C-term	-0.00369492	2007	1004.5	2007	1004.51	2	25	1.1.1.3491.2	53.1415	82.07	72.88	53.04	1.14	15234.1
1	42	42	62.88	62.88	62.88	tr|T2RG98|T2RG98_CLOSO	Uncharacterized protein OS=Paeniclostridium sordellii ATCC 9714 GN=H477_4099 PE=4 SV=1			0	99	FPVTPSDAPDFLTNINLF			cleaved F-S@C-term	-0.00369492	2007	1004.5	2007	1004.51	2	22	1.1.1.3505.2	53.5089	82.07	48.82	53.04	1.14	6424.13
1	42	42	62.88	62.88	62.88	tr|T2RG98|T2RG98_CLOSO	Uncharacterized protein OS=Paeniclostridium sordellii ATCC 9714 GN=H477_4099 PE=4 SV=1			0	99	FVVKSIVPTTPFSGGTFSAR	Carbamyl(K)@4		missed K-S@4	-0.00287088	2140.13	714.384	2140.13	714.385	3	30	1.1.1.3314.3	43.4308	1038.42	752.76	43.57	0.22	36131.1
1	42	42	62.88	62.88	62.88	tr|T2RG98|T2RG98_CLOSO	Uncharacterized protein OS=Paeniclostridium sordellii ATCC 9714 GN=H477_4099 PE=4 SV=1			0	99	IFDELLISEK				-0.000416583	1205.65	603.834	1205.65	603.834	2	16	1.1.1.3274.4	39.6695	2928.75	1720	39.77	0.24	27628.1
1	42	42	62.88	62.88	62.88	tr|T2RG98|T2RG98_CLOSO	Uncharacterized protein OS=Paeniclostridium sordellii ATCC 9714 GN=H477_4099 PE=4 SV=1			0	99	IFDELLISEK	Carbamidomethyl@N-term			-0.00699726	1262.67	632.342	1262.68	632.345	2	15	1.1.1.3278.3	39.9538	306.92	298.69	39.94	0.29	28335.1
1	42	42	62.88	62.88	62.88	tr|T2RG98|T2RG98_CLOSO	Uncharacterized protein OS=Paeniclostridium sordellii ATCC 9714 GN=H477_4099 PE=4 SV=1			0	99	IFDELLISEK	Delta:H(2)C(2)@N-term			-0.0132512	1231.66	616.836	1231.67	616.842	2	15	1.1.1.3358.4	48.2164	30.15	29.72	48.21	0.35	6629.13
1	42	42	62.88	62.88	62.88	tr|T2RG98|T2RG98_CLOSO	Uncharacterized protein OS=Paeniclostridium sordellii ATCC 9714 GN=H477_4099 PE=4 SV=1			0	99	IFDELLISEKLYLTK	Carbamyl(K)@10		missed K-L@10	-0.00408452	1867.03	623.351	1867.03	623.352	3	26	1.1.1.3359.2	48.2636	219.39	196.17	48.34	0.24	28332.1
1	42	42	62.88	62.88	62.88	tr|T2RG98|T2RG98_CLOSO	Uncharacterized protein OS=Paeniclostridium sordellii ATCC 9714 GN=H477_4099 PE=4 SV=1			0	99	IFDFKCVNQQIPR	Carbamidomethyl@N-term; Carbamyl(K)@5; Carbamidomethyl(C)@6		missed K-C@5	0.00791395	1763.89	588.969	1763.88	588.966	3	21	1.1.1.3264.2	38.7147	910.11	906.44	38.71	0.26	35882.2
1	42	42	62.88	62.88	62.88	tr|T2RG98|T2RG98_CLOSO	Uncharacterized protein OS=Paeniclostridium sordellii ATCC 9714 GN=H477_4099 PE=4 SV=1			0	99	IFDFKCVNQQIPR	Carbamyl(K)@5; Carbamidomethyl(C)@6		missed K-C@5	-0.00484748	1706.85	569.958	1706.86	569.959	3	20	1.1.1.3267.2	38.9876	4083.64	2521.44	39.12	0.28	33303.1
1	42	42	62.88	62.88	62.88	tr|T2RG98|T2RG98_CLOSO	Uncharacterized protein OS=Paeniclostridium sordellii ATCC 9714 GN=H477_4099 PE=4 SV=1			0	99	SIAPQVFTVDPR	Carbamidomethyl@N-term		cleaved R-P@C-term	-0.0041957	1385.73	693.87	1385.73	693.872	2	18	1.1.1.3233.2	36.0129	522.81	492.55	36.06	0.25	32216.1
1	42	42	62.88	62.88	62.88	tr|T2RG98|T2RG98_CLOSO	Uncharacterized protein OS=Paeniclostridium sordellii ATCC 9714 GN=H477_4099 PE=4 SV=1			0	99	SIAPQVFTVDPR	Acetyl@N-term; Oxidation(P)@4	Acetyl@18; Oxidation(P)@21	cleaved R-P@C-term	0.0105873	1386.73	694.37	1386.71	694.364	2	17	1.1.1.3242.2	36.805	192.82	180.51	36.86	0.37	30747.1
2	36	36	60.3	60.3	60.3	tr|T0DXD7|T0DXD7_CLOSO	Uncharacterized protein OS=Paeniclostridium sordellii ATCC 9714 GN=H477_3144 PE=4 SV=1			2	99	EKGLNVVVYDLELELTGR	Carbamyl@N-term		missed K-G@2	0.0168056	2089.12	697.381	2089.11	697.376	3	24	1.1.1.3558.2	54.8712	246.11	168.76	54.98	0.26	7028.12
2	36	36	60.3	60.3	60.3	tr|T0DXD7|T0DXD7_CLOSO	Uncharacterized protein OS=Paeniclostridium sordellii ATCC 9714 GN=H477_3144 PE=4 SV=1			2	99	FGCSEFTAVAIPC	Carbamidomethyl(C)@3; Carbamidomethyl(C)@13		cleaved C-S@C-term	0.00305754	1457.64	729.825	1457.63	729.823	2	18	1.1.1.3276.2	39.7783	631.62	509.8	39.84	0.17	33725.1
2	36	36	60.3	60.3	60.3	tr|T0DXD7|T0DXD7_CLOSO	Uncharacterized protein OS=Paeniclostridium sordellii ATCC 9714 GN=H477_3144 PE=4 SV=1			2	99	FNTLSGDLVVPADGR			cleaved Y-F@N-term	-0.00750437	1559.79	780.901	1559.79	780.904	2	26	1.1.1.3238.3	36.4691	292.76	286.56	36.51	0.27	34433.1
2	36	36	60.3	60.3	60.3	tr|T0DXD7|T0DXD7_CLOSO	Uncharacterized protein OS=Paeniclostridium sordellii ATCC 9714 GN=H477_3144 PE=4 SV=1			2	99	GLNVVVYDLELELTGR				0.0110475	1788.97	597.332	1788.96	597.328	3	27	1.1.1.3510.2	53.8115	198.53	193.31	53.88	0.3	25054.2
2	36	36	60.3	60.3	60.3	tr|T0DXD7|T0DXD7_CLOSO	Uncharacterized protein OS=Paeniclostridium sordellii ATCC 9714 GN=H477_3144 PE=4 SV=1			2	99	INPGTTSLEQLK				0.00760484	1299.71	650.863	1299.7	650.859	2	17	1.1.1.3197.2	32.41	160.71	158.47	32.49	0.25	14879.1
2	36	36	60.3	60.3	60.3	tr|T0DXD7|T0DXD7_CLOSO	Uncharacterized protein OS=Paeniclostridium sordellii ATCC 9714 GN=H477_3144 PE=4 SV=1			2	99	INPGTTSLEQLKIEK	Carbamyl(K)@12		missed K-I@12	0.00269441	1712.93	571.985	1712.93	571.984	3	22	1.1.1.3234.4	36.1276	344.13	298.35	36.07	0.26	32962.1
2	36	36	60.3	60.3	60.3	tr|T0DXD7|T0DXD7_CLOSO	Uncharacterized protein OS=Paeniclostridium sordellii ATCC 9714 GN=H477_3144 PE=4 SV=1			2	99	INPGTTSLEQLKIEKVDR	Carbamyl(K)@12; Carbamyl(K)@15		missed K-I@12; missed K-V@15	0.00101718	2126.13	709.719	2126.13	709.718	3	30	1.1.1.3260.2	38.3961	2175.26	1272.09	38.52	0.17	37040.1
2	36	36	60.3	60.3	60.3	tr|T0DXD7|T0DXD7_CLOSO	Uncharacterized protein OS=Paeniclostridium sordellii ATCC 9714 GN=H477_3144 PE=4 SV=1			2	99	KSNGDDLDFKYELGNLCGPLPSSAR	Carbamyl@N-term; Deamidated(N)@3; Carbamyl(K)@10; Carbamidomethyl(C)@17		missed K-S@1; missed K-Y@10	0.0246429	2839.33	947.452	2839.31	947.443	3	31	1.1.1.3311.4	43.1481	148.29	140.59	43.07	0.3	32993.2
2	36	36	60.3	60.3	60.3	tr|T0DXD7|T0DXD7_CLOSO	Uncharacterized protein OS=Paeniclostridium sordellii ATCC 9714 GN=H477_3144 PE=4 SV=1			2	99	LVDTFGSVCDFSQFTGK	Carbamidomethyl(C)@9			-0.000181256	1906.88	954.446	1906.88	954.446	2	27	1.1.1.3294.2	41.3439	897.66	719.81	41.42	0.25	38322.1
2	36	36	60.3	60.3	60.3	tr|T0DXD7|T0DXD7_CLOSO	Uncharacterized protein OS=Paeniclostridium sordellii ATCC 9714 GN=H477_3144 PE=4 SV=1			2	99	NTLSGDLVVPADGR			cleaved F-N@N-term	0.000682792	1412.73	707.371	1412.73	707.37	2	21	1.1.1.3208.3	33.6044	148.84	138.61	33.55	0.35	27276.1
2	36	36	60.3	60.3	60.3	tr|T0DXD7|T0DXD7_CLOSO	Uncharacterized protein OS=Paeniclostridium sordellii ATCC 9714 GN=H477_3144 PE=4 SV=1			2	99	QDFQTQLTVDCIGK	Carbamidomethyl(C)@11			-0.012092	1651.78	826.895	1651.79	826.901	2	24	1.1.1.3224.4	35.1542	392.84	380.82	35.14	0.42	37636.1
2	36	36	60.3	60.3	60.3	tr|T0DXD7|T0DXD7_CLOSO	Uncharacterized protein OS=Paeniclostridium sordellii ATCC 9714 GN=H477_3144 PE=4 SV=1			2	99	QDFQTQLTVDCIGKGVITQK	Carbamidomethyl(C)@11; Carbamyl(K)@14		missed K-G@14	0.00950214	2321.18	774.733	2321.17	774.73	3	27	1.1.1.3268.4	39.1202	224.23	169.8	38.96	0.43	33317.1
2	36	36	60.3	60.3	60.3	tr|T0DXD7|T0DXD7_CLOSO	Uncharacterized protein OS=Paeniclostridium sordellii ATCC 9714 GN=H477_3144 PE=4 SV=1			2	99	SVFEYDVCGQLNR	Carbamidomethyl(C)@8			0.00696768	1585.73	793.87	1585.72	793.867	2	22	1.1.1.3233.3	36.0288	481.02	449.66	36.06	0.25	34162.1
2	36	36	60.3	60.3	60.3	tr|T0DXD7|T0DXD7_CLOSO	Uncharacterized protein OS=Paeniclostridium sordellii ATCC 9714 GN=H477_3144 PE=4 SV=1			2	99	TLSGDLVVPADGR			cleaved N-T@N-term	-0.00131071	1298.68	650.348	1298.68	650.349	2	21	1.1.1.3203.2	33.0808	282.19	272.82	33.15	0.34	31672.1
2	36	36	60.3	60.3	60.3	tr|T0DXD7|T0DXD7_CLOSO	Uncharacterized protein OS=Paeniclostridium sordellii ATCC 9714 GN=H477_3144 PE=4 SV=1			2	99	TNVTIEKVCINYSSIK	Carbamyl(K)@7; Carbamidomethyl(C)@9		missed K-V@7	0.000637976	1910.98	638	1910.98	638	3	23	1.1.1.3249.4	37.4968	359.1	299.13	37.43	0.16	33010.1
2	36	36	60.3	60.3	60.3	tr|T0DXD7|T0DXD7_CLOSO	Uncharacterized protein OS=Paeniclostridium sordellii ATCC 9714 GN=H477_3144 PE=4 SV=1			2	99	VFTDGKKSNGDDLDFK	Malonyl(K)@6; Deamidated(N)@9	Malonyl(K)@9	missed K-K@6; missed K-S@7	0.00582573	1871.85	624.957	1871.84	624.955	3	19	1.1.1.3208.4	33.6334	3255.21	383.33	34.02	0.26	32849.1
2	36	36	60.3	60.3	60.3	tr|T0DXD7|T0DXD7_CLOSO	Uncharacterized protein OS=Paeniclostridium sordellii ATCC 9714 GN=H477_3144 PE=4 SV=1			2	99	VVVYDLELELTGR			cleaved N-V@N-term	-0.00349822	1504.81	753.412	1504.81	753.414	2	22	1.1.1.3319.3	43.9432	137.74	130.23	43.99	0.44	18185.2
2	36	36	60.3	60.3	60.3	tr|T0DXD7|T0DXD7_CLOSO	Uncharacterized protein OS=Paeniclostridium sordellii ATCC 9714 GN=H477_3144 PE=4 SV=1			2	99	YELGNLCGPLPSSAR	Carbamidomethyl(C)@7			-0.00909415	1632.78	817.399	1632.79	817.404	2	22	1.1.1.3237.2	36.3606	1949.9	1790.37	36.42	0.17	40250.1
2	36	36	60.3	60.3	60.3	tr|T0DXD7|T0DXD7_CLOSO	Uncharacterized protein OS=Paeniclostridium sordellii ATCC 9714 GN=H477_3144 PE=4 SV=1			0	99	EKGLNVVVYDLELELTGR	Succinyl(K)@2	Succinyl(K)@103	missed K-G@2	0.0239735	2146.14	716.387	2146.12	716.379	3	15	1.1.1.3570.2	55.0741	32.1	28.18	55.14	0.27	4378.13
2	36	36	60.3	60.3	60.3	tr|T0DXD7|T0DXD7_CLOSO	Uncharacterized protein OS=Paeniclostridium sordellii ATCC 9714 GN=H477_3144 PE=4 SV=1			0	99	EKGLNVVVYDLELELTGR	Carbamyl@N-term		missed K-G@2	0.0168056	2089.12	697.381	2089.11	697.376	3	22	1.1.1.3579.2	55.2084	246.11	72.91	54.98	0.26	7622.13
2	36	36	60.3	60.3	60.3	tr|T0DXD7|T0DXD7_CLOSO	Uncharacterized protein OS=Paeniclostridium sordellii ATCC 9714 GN=H477_3144 PE=4 SV=1			0	99	GLNVVVYDLELELTGR	Carbamidomethyl@N-term			0.00879856	1845.99	616.338	1845.98	616.335	3	18	1.1.1.3517.2	53.995	56.69	49.98	54.04	0.44	5908.13
2	36	36	60.3	60.3	60.3	tr|T0DXD7|T0DXD7_CLOSO	Uncharacterized protein OS=Paeniclostridium sordellii ATCC 9714 GN=H477_3144 PE=4 SV=1			0	99	GLNVVVYDLELELTGR				0.0110475	1788.97	597.332	1788.96	597.328	3	22	1.1.1.3525.2	54.1535	198.53	61.93	53.88	0.3	8775.13
2	36	36	60.3	60.3	60.3	tr|T0DXD7|T0DXD7_CLOSO	Uncharacterized protein OS=Paeniclostridium sordellii ATCC 9714 GN=H477_3144 PE=4 SV=1			0	99	VFTDGKKSNGDDLDFK	Malonyl(K)@6; Deamidated(N)@9	Malonyl(K)@9	missed K-K@6; missed K-S@7	0.00582573	1871.85	624.957	1871.84	624.955	3	20	1.1.1.3210.2	33.76	3255.21	667.95	34.02	0.26	36556.1
2	36	36	60.3	60.3	60.3	tr|T0DXD7|T0DXD7_CLOSO	Uncharacterized protein OS=Paeniclostridium sordellii ATCC 9714 GN=H477_3144 PE=4 SV=1			0	99	VFTDGKKSNGDDLDFK	Malonyl(K)@6; Deamidated(N)@9	Malonyl(K)@9	missed K-K@6; missed K-S@7	0.00582573	1871.85	624.957	1871.84	624.955	3	19	1.1.1.3212.2	33.9591	3255.21	2480.8	34.02	0.26	33135.1
2	36	36	60.3	60.3	60.3	tr|T0DXD7|T0DXD7_CLOSO	Uncharacterized protein OS=Paeniclostridium sordellii ATCC 9714 GN=H477_3144 PE=4 SV=1			0	99	VFTDGKKSNGDDLDFK	Malonyl(K)@6; Deamidated(N)@9	Malonyl(K)@9	missed K-K@6; missed K-S@7	0.00582573	1871.85	624.957	1871.84	624.955	3	21	1.1.1.3216.2	34.3667	3255.21	500.7	34.02	0.26	32908.1
2	36	36	60.3	60.3	60.3	tr|T0DXD7|T0DXD7_CLOSO	Uncharacterized protein OS=Paeniclostridium sordellii ATCC 9714 GN=H477_3144 PE=4 SV=1			0	99	YELGNLCGPLPSSAR	Carbamidomethyl@N-term; Carbamidomethyl(C)@7			-0.00502755	1689.81	845.912	1689.81	845.914	2	25	1.1.1.3239.4	36.6039	214.67	210.72	36.59	0.25	36014.1
3	32	32	57.38	51.48	51.48	tr|T0D4X3|T0D4X3_CLOSO	Translation elongation factor Tu OS=Paeniclostridium sordellii ATCC 9714 GN=tuf PE=4 SV=1			2	99	DLLNEYEFPGDDTPIVR	Carbamidomethyl@N-term			-0.00329675	2048.97	683.996	2048.97	683.997	3	16	1.1.1.3302.4	42.2364	139.1	133.75	42.15	0.94	15921.1
3	32	32	57.38	51.48	51.48	tr|T0D4X3|T0D4X3_CLOSO	Translation elongation factor Tu OS=Paeniclostridium sordellii ATCC 9714 GN=tuf PE=4 SV=1			2	99	DVDKDFLMPVEDVFSITGR			missed K-D@4	-0.00376769	2182.06	728.36	2182.06	728.361	3	25	1.1.1.3378.2	50.0328	521.3	90.32	49.8	0.31	13925.1
3	32	32	57.38	51.48	51.48	tr|T0D4X3|T0D4X3_CLOSO	Translation elongation factor Tu OS=Paeniclostridium sordellii ATCC 9714 GN=tuf PE=4 SV=1			2	99	FDGYRPQFYFR			cleaved F-F@N-term	0.00916174	1494.71	499.245	1494.7	499.242	3	16	1.1.1.3256.4	38.0939	165.79	142	38	0.22	20762.1
3	32	32	57.38	51.48	51.48	tr|T0D4X3|T0D4X3_CLOSO	Translation elongation factor Tu OS=Paeniclostridium sordellii ATCC 9714 GN=tuf PE=4 SV=1			2	99	GSALMALQDSSSEWGDK				-0.000997529	1780.79	891.404	1780.79	891.404	2	28	1.1.1.3257.2	38.1259	345.37	333.51	38.1	0.19	37276.1
3	32	32	57.38	51.48	51.48	tr|T0D4X3|T0D4X3_CLOSO	Translation elongation factor Tu OS=Paeniclostridium sordellii ATCC 9714 GN=tuf PE=4 SV=1			2	99	GVLKVQDEVELVGLAEEPR	Carbamyl(K)@4		missed K-V@4	0.0025712	2122.13	708.384	2122.13	708.383	3	27	1.1.1.3313.4	43.3675	296.69	291.85	43.37	0.31	23261.1
3	32	32	57.38	51.48	51.48	tr|T0D4X3|T0D4X3_CLOSO	Translation elongation factor Tu OS=Paeniclostridium sordellii ATCC 9714 GN=tuf PE=4 SV=1			2	99	HTPFFDGYRPQFY			cleaved Y-F@C-term	0.00937337	1673.77	558.931	1673.76	558.928	3	17	1.1.1.3281.4	40.2047	331.41	278.95	40.13	0.17	37555.1
3	32	32	57.38	51.48	51.48	tr|T0D4X3|T0D4X3_CLOSO	Translation elongation factor Tu OS=Paeniclostridium sordellii ATCC 9714 GN=tuf PE=4 SV=1			2	99	HTPFFDGYRPQFYFR				-0.000193962	1976.93	659.985	1976.93	659.985	3	13	1.1.1.3296.3	41.5878	262.36	237.97	41.63	0.54	35784.1
3	32	32	57.38	51.48	51.48	tr|T0D4X3|T0D4X3_CLOSO	Translation elongation factor Tu OS=Paeniclostridium sordellii ATCC 9714 GN=tuf PE=4 SV=1			2	99	IVELFEQIDEYI	Dehydrated(Y)@11	Dehydrated(Y)@109	cleaved I-P@C-term	0.00262828	1491.75	746.883	1491.75	746.882	2	18	1.1.1.3357.2	48.0271	48.09	45.81	47.99	0.35	12332.1
3	32	32	57.38	51.48	51.48	tr|T0D4X3|T0D4X3_CLOSO	Translation elongation factor Tu OS=Paeniclostridium sordellii ATCC 9714 GN=tuf PE=4 SV=1			2	99	IVELFEQIDEYIPAPER				0.0157696	2060.06	687.695	2060.05	687.69	3	26	1.1.1.3356.2	47.9089	505.34	453.33	47.99	0.23	36347.1
3	32	32	57.38	51.48	51.48	tr|T0D4X3|T0D4X3_CLOSO	Translation elongation factor Tu OS=Paeniclostridium sordellii ATCC 9714 GN=tuf PE=4 SV=1			2	99	KLLDEAQAGDNIGALIR	Carbamyl@N-term		missed K-L@1	-0.00146029	1838.98	614.002	1838.98	614.002	3	25	1.1.1.3281.3	40.1712	936.83	816.27	40.23	0.19	34972.1
3	32	32	57.38	51.48	51.48	tr|T0D4X3|T0D4X3_CLOSO	Translation elongation factor Tu OS=Paeniclostridium sordellii ATCC 9714 GN=tuf PE=4 SV=1			2	99	KLVVTGVEMFR	Carbamyl@N-term		missed K-L@1	-0.00265228	1320.72	661.367	1320.72	661.368	2	17	1.1.1.3280.2	40.0671	794.05	666.29	40.13	0.17	30945.1
3	32	32	57.38	51.48	51.48	tr|T0D4X3|T0D4X3_CLOSO	Translation elongation factor Tu OS=Paeniclostridium sordellii ATCC 9714 GN=tuf PE=4 SV=1			2	99	LLDEAQAGDNIGALIR				-0.010432	1667.87	834.944	1667.88	834.949	2	29	1.1.1.3271.4	39.3949	312.89	304.12	39.39	0.34	37457.1
3	32	32	57.38	51.48	51.48	tr|T0D4X3|T0D4X3_CLOSO	Translation elongation factor Tu OS=Paeniclostridium sordellii ATCC 9714 GN=tuf PE=4 SV=1			2	99	LVVTGVEMFRK	Lys-loss@C-term		missed R-K@10	-0.00524161	1149.62	575.816	1149.62	575.818	2	15	1.1.1.3267.4	39.0144	315.9	296.69	39.04	0.16	24672.1
3	32	32	57.38	51.48	51.48	tr|T0D4X3|T0D4X3_CLOSO	Translation elongation factor Tu OS=Paeniclostridium sordellii ATCC 9714 GN=tuf PE=4 SV=1			2	99	QVGVPYIVVFLNK	Gln->pyro-Glu@N-term			-0.00929418	1457.82	729.917	1457.83	729.921	2	16	1.1.1.3468.3	52.4246	38.2	37.66	52.44	0.42	4531.13
3	32	32	57.38	51.48	51.48	tr|T0D4X3|T0D4X3_CLOSO	Translation elongation factor Tu OS=Paeniclostridium sordellii ATCC 9714 GN=tuf PE=4 SV=1			2	99	TVASGVVASIIE				-0.00278242	1144.63	573.323	1144.63	573.324	2	19	1.1.1.3279.3	40.0122	2236.22	1519.95	40.13	0.17	24146.1
3	32	32	57.38	51.48	51.48	tr|T0D4X3|T0D4X3_CLOSO	Translation elongation factor Tu OS=Paeniclostridium sordellii ATCC 9714 GN=tuf PE=4 SV=1			2	99	VQDEVELVGLAEEPRK	Lys-loss@C-term		missed R-K@15	0.000570363	1681.85	841.934	1681.85	841.933	2	27	1.1.1.3253.2	37.7606	381.37	373.85	37.77	0.34	36194.1
3	32	32	57.38	51.48	51.48	tr|T0D4X3|T0D4X3_CLOSO	Translation elongation factor Tu OS=Paeniclostridium sordellii ATCC 9714 GN=tuf PE=4 SV=1			0	99	DLLNEYEFPGDDTPIVR				0.00959435	1991.96	996.986	1991.95	996.981	2	23	1.1.1.3298.2	41.7485	865.33	535.08	41.93	0.32	36274.1
3	32	32	57.38	51.48	51.48	tr|T0D4X3|T0D4X3_CLOSO	Translation elongation factor Tu OS=Paeniclostridium sordellii ATCC 9714 GN=tuf PE=4 SV=1			0	99	DLLNEYEFPGDDTPIVR	Carbamidomethyl@N-term			-0.00329675	2048.97	683.996	2048.97	683.997	3	22	1.1.1.3303.4	42.3411	139.1	99.98	42.15	0.94	19685.2
3	32	32	57.38	51.48	51.48	tr|T0D4X3|T0D4X3_CLOSO	Translation elongation factor Tu OS=Paeniclostridium sordellii ATCC 9714 GN=tuf PE=4 SV=1			0	99	DVDKDFLMPVEDVFSITGR	Oxidation(M)@8		missed K-D@4	0.0259202	2198.08	733.701	2198.06	733.693	3	25	1.1.1.3357.3	48.0625	73.47	70.81	47.99	0.35	19091.1
3	32	32	57.38	51.48	51.48	tr|T0D4X3|T0D4X3_CLOSO	Translation elongation factor Tu OS=Paeniclostridium sordellii ATCC 9714 GN=tuf PE=4 SV=1			0	99	DVDKDFLMPVEDVFSITGR	Oxidation(M)@8		missed K-D@4	-0.000264383	2198.06	733.693	2198.06	733.693	3	24	1.1.1.3362.3	48.6538	92.26	72.53	48.47	0.47	15521.1
3	32	32	57.38	51.48	51.48	tr|T0D4X3|T0D4X3_CLOSO	Translation elongation factor Tu OS=Paeniclostridium sordellii ATCC 9714 GN=tuf PE=4 SV=1			0	99	DVDKDFLMPVEDVFSITGR			missed K-D@4	-0.00376769	2182.06	728.36	2182.06	728.361	3	27	1.1.1.3374.2	49.6379	521.3	356.28	49.8	0.31	31369.1
3	32	32	57.38	51.48	51.48	tr|T0D4X3|T0D4X3_CLOSO	Translation elongation factor Tu OS=Paeniclostridium sordellii ATCC 9714 GN=tuf PE=4 SV=1			0	99	DVDKDFLMPVEDVFSITGR	Carbamidomethyl(K)@4		missed K-D@4	-0.0118577	2239.07	747.364	2239.08	747.368	3	23	1.1.1.3374.4	49.7091	36.15	35.87	49.7	0.51	11602.1
3	32	32	57.38	51.48	51.48	tr|T0D4X3|T0D4X3_CLOSO	Translation elongation factor Tu OS=Paeniclostridium sordellii ATCC 9714 GN=tuf PE=4 SV=1			0	99	DVDKDFLMPVEDVFSITGR	Carbamyl(K)@4; Oxidation(M)@8		missed K-D@4	0.0208797	2241.08	748.035	2241.06	748.028	3	27	1.1.1.3382.2	50.3259	80.46	74.57	50.37	0.42	16556.1
3	32	32	57.38	51.48	51.48	tr|T0D4X3|T0D4X3_CLOSO	Translation elongation factor Tu OS=Paeniclostridium sordellii ATCC 9714 GN=tuf PE=4 SV=1			0	99	DVDKDFLMPVEDVFSITGR	Carbamyl(K)@4; Oxidation(M)@8		missed K-D@4	0.0208797	2241.08	748.035	2241.06	748.028	3	24	1.1.1.3397.2	51.0618	80.46	33.2	50.37	0.42	10339.1
3	32	32	57.38	51.48	51.48	tr|T0D4X3|T0D4X3_CLOSO	Translation elongation factor Tu OS=Paeniclostridium sordellii ATCC 9714 GN=tuf PE=4 SV=1			0	99	DVDKDFLMPVEDVFSITGR	Carbamyl(K)@4		missed K-D@4	0.00822043	2225.08	742.699	2225.07	742.696	3	25	1.1.1.3464.2	52.2027	213.27	182.58	52.29	0.51	13988.1
3	32	32	57.38	51.48	51.48	tr|T0D4X3|T0D4X3_CLOSO	Translation elongation factor Tu OS=Paeniclostridium sordellii ATCC 9714 GN=tuf PE=4 SV=1			0	99	DVDKDFLMPVEDVFSITGR	Carbamyl(K)@4		missed K-D@4	0.00822043	2225.08	742.699	2225.07	742.696	3	28	1.1.1.3471.2	52.5643	213.27	144.59	52.29	0.51	14073.1
3	32	32	57.38	51.48	51.48	tr|T0D4X3|T0D4X3_CLOSO	Translation elongation factor Tu OS=Paeniclostridium sordellii ATCC 9714 GN=tuf PE=4 SV=1			0	99	IVELFEQIDEYIPAPER	Carbamidomethyl@N-term			0.0160975	2117.08	706.702	2117.07	706.697	3	19	1.1.1.3363.4	48.8072	53.58	48.39	48.7	0.24	5777.13
3	32	32	57.38	51.48	51.48	tr|T0D4X3|T0D4X3_CLOSO	Translation elongation factor Tu OS=Paeniclostridium sordellii ATCC 9714 GN=tuf PE=4 SV=1			0	99	QVGVPYIVVFLNK				0.000131483	1474.86	738.435	1474.85	738.435	2	16	1.1.1.3352.3	47.5523	203.71	114.51	47.76	0.31	15516.1
3	32	32	57.38	51.48	51.48	tr|T0D4X3|T0D4X3_CLOSO	Translation elongation factor Tu OS=Paeniclostridium sordellii ATCC 9714 GN=tuf PE=4 SV=1			0	99	QVGVPYIVVFLNK				0.000131483	1474.86	738.435	1474.85	738.435	2	15	1.1.1.3356.3	47.9445	203.71	102.96	47.76	0.31	12498.1
3	32	32	57.38	51.48	51.48	tr|T0D4X3|T0D4X3_CLOSO	Translation elongation factor Tu OS=Paeniclostridium sordellii ATCC 9714 GN=tuf PE=4 SV=1			0	99	TVASGVVASIIE				-0.00278242	1144.63	573.323	1144.63	573.324	2	17	1.1.1.3283.4	40.409	2236.22	165.49	40.13	0.17	14591.1
4	22	22	55.67	55.67	55.67	tr|T0DRL7|T0DRL7_CLOSO	Uncharacterized protein OS=Paeniclostridium sordellii ATCC 9714 GN=H477_2973 PE=4 SV=1			2	99	EAKLYLSLVQDLENR	Carbamyl@N-term		missed K-L@3	0.00429278	1832.97	611.996	1832.96	611.995	3	21	1.1.1.3353.2	47.5999	381.34	318.54	47.67	0.19	30647.1
4	22	22	55.67	55.67	55.67	tr|T0DRL7|T0DRL7_CLOSO	Uncharacterized protein OS=Paeniclostridium sordellii ATCC 9714 GN=H477_2973 PE=4 SV=1			2	99	ETELFWDQIMMEHAL			cleaved L-F@C-term	0.0272032	1891.88	946.945	1891.85	946.932	2	24	1.1.1.3377.3	49.9858	47.31	46.44	49.92	0.31	23284.1
4	22	22	55.67	55.67	55.67	tr|T0DRL7|T0DRL7_CLOSO	Uncharacterized protein OS=Paeniclostridium sordellii ATCC 9714 GN=H477_2973 PE=4 SV=1			2	99	GLLDPSENELIDTADEFADDFEDLIK				0.00780308	2923.36	975.46	2923.35	975.457	3	33	1.1.1.4082.2	61.3639	17.21	17.18	61.35	0.28	11612.1
4	22	22	55.67	55.67	55.67	tr|T0DRL7|T0DRL7_CLOSO	Uncharacterized protein OS=Paeniclostridium sordellii ATCC 9714 GN=H477_2973 PE=4 SV=1			2	99	ILPLLADHVLR			cleaved I-I@N-term	-0.00961682	1258.77	630.391	1258.78	630.395	2	18	1.1.1.3341.2	46.2841	155.47	153.51	46.26	0.3	26479.1
4	22	22	55.67	55.67	55.67	tr|T0DRL7|T0DRL7_CLOSO	Uncharacterized protein OS=Paeniclostridium sordellii ATCC 9714 GN=H477_2973 PE=4 SV=1			2	99	LFTGNYPLLIEHILR			cleaved N-L@N-term	0.000625508	1798.01	600.346	1798.01	600.345	3	13	1.1.1.3365.2	48.9368	104.84	76.07	48.81	0.2	7792.13
4	22	22	55.67	55.67	55.67	tr|T0DRL7|T0DRL7_CLOSO	Uncharacterized protein OS=Paeniclostridium sordellii ATCC 9714 GN=H477_2973 PE=4 SV=1			2	99	LLINGLISFKER	Deamidated(N)@4; Carbamyl(K)@10		missed K-E@10	0.00804619	1445.83	723.923	1445.82	723.919	2	19	1.1.1.3320.2	44.0269	120.99	108.21	43.9	0.33	20067.1
4	22	22	55.67	55.67	55.67	tr|T0DRL7|T0DRL7_CLOSO	Uncharacterized protein OS=Paeniclostridium sordellii ATCC 9714 GN=H477_2973 PE=4 SV=1			2	99	LYLSLVQDLENR				-0.0081575	1461.77	731.895	1461.78	731.899	2	21	1.1.1.3323.2	44.3624	251.55	244.11	44.33	0.21	31918.1
4	22	22	55.67	55.67	55.67	tr|T0DRL7|T0DRL7_CLOSO	Uncharacterized protein OS=Paeniclostridium sordellii ATCC 9714 GN=H477_2973 PE=4 SV=1			2	99	NFKQAGTEGIASCKIR	Carbamyl(K)@3; Carbamidomethyl(C)@13; Carbamyl(K)@14		missed K-Q@3; missed K-I@14	0.00799394	1864.93	622.65	1864.92	622.648	3	22	1.1.1.3202.3	32.9931	82.49	81.07	32.93	0.33	13773.1
4	22	22	55.67	55.67	55.67	tr|T0DRL7|T0DRL7_CLOSO	Uncharacterized protein OS=Paeniclostridium sordellii ATCC 9714 GN=H477_2973 PE=4 SV=1			2	99	NLFTGNYPLLIEHILR			cleaved C-N@N-term	-0.0144886	1912.04	638.355	1912.06	638.36	3	16	1.1.1.3388.2	50.7133	22.53	15.99	50.55	0.21	3968.13
4	22	22	55.67	55.67	55.67	tr|T0DRL7|T0DRL7_CLOSO	Uncharacterized protein OS=Paeniclostridium sordellii ATCC 9714 GN=H477_2973 PE=4 SV=1			2	99	PLLADHVLR			cleaved L-P@N-term	-0.0205838	1032.59	517.301	1032.61	517.311	2	15	1.1.1.3341.4	46.3549	50.99	50.79	46.26	0.3	10220.1
4	22	22	55.67	55.67	55.67	tr|T0DRL7|T0DRL7_CLOSO	Uncharacterized protein OS=Paeniclostridium sordellii ATCC 9714 GN=H477_2973 PE=4 SV=1			2	99	SIILPLLADHVLR	Carbamidomethyl@N-term			0.0054641	1515.92	506.314	1515.91	506.312	3	16	1.1.1.3344.2	46.58	59.32	52.98	46.66	0.24	13577.1
4	22	22	55.67	55.67	55.67	tr|T0DRL7|T0DRL7_CLOSO	Uncharacterized protein OS=Paeniclostridium sordellii ATCC 9714 GN=H477_2973 PE=4 SV=1			0	99	SIILPLLADHVLR				-0.00654875	1458.89	487.303	1458.89	487.305	3	15	1.1.1.3339.2	46.0638	1032.58	416.95	46.26	0.3	24860.1
4	22	22	55.67	55.67	55.67	tr|T0DRL7|T0DRL7_CLOSO	Uncharacterized protein OS=Paeniclostridium sordellii ATCC 9714 GN=H477_2973 PE=4 SV=1			0	99	SIILPLLADHVLR				-0.00654875	1458.89	487.303	1458.89	487.305	3	16	1.1.1.3342.2	46.3796	1032.58	933.63	46.26	0.3	33400.1
5	20	20	94.44	94.44	94.44	tr|T0E503|T0E503_CLOSO	Small, acid-soluble spore protein alpha OS=Paeniclostridium sordellii ATCC 9714 GN=H477_1172 PE=4 SV=1			2	99	KLVEMAEKQMSGQQQ	Carbamyl@N-term; Carbamyl(K)@8		missed K-L@1; missed K-Q@8	-0.00460859	1819.85	607.624	1819.86	607.626	3	21	1.1.1.3214.2	34.1194	564.66	544.32	34.2	0.23	34141.1
5	20	20	94.44	94.44	94.44	tr|T0E503|T0E503_CLOSO	Small, acid-soluble spore protein alpha OS=Paeniclostridium sordellii ATCC 9714 GN=H477_1172 PE=4 SV=1			2	99	LEIANELGMSNYDTADK				0.00654377	1882.87	942.442	1882.86	942.438	2	27	1.1.1.3251.2	37.6069	431.06	430.66	37.6	0.23	37543.1
5	20	20	94.44	94.44	94.44	tr|T0E503|T0E503_CLOSO	Small, acid-soluble spore protein alpha OS=Paeniclostridium sordellii ATCC 9714 GN=H477_1172 PE=4 SV=1			2	99	LEIANELGMSNYDTADKGNMTAR	Carbamyl(K)@17		missed K-G@17	0.0343821	2556.19	853.072	2556.16	853.06	3	35	1.1.1.3259.4	38.364	251.9	233.94	38.29	0.25	33203.1
5	20	20	94.44	94.44	94.44	tr|T0E503|T0E503_CLOSO	Small, acid-soluble spore protein alpha OS=Paeniclostridium sordellii ATCC 9714 GN=H477_1172 PE=4 SV=1			2	99	LVEMAEKQMSGQQQ	Carbamyl(K)@7		missed K-Q@7	0.014548	1648.77	825.392	1648.75	825.385	2	24	1.1.1.3183.4	30.9917	331.66	327.86	31.01	0.19	37304.1
5	20	20	94.44	94.44	94.44	tr|T0E503|T0E503_CLOSO	Small, acid-soluble spore protein alpha OS=Paeniclostridium sordellii ATCC 9714 GN=H477_1172 PE=4 SV=1			2	99	QNGYVGGYMTK	Gln->pyro-Glu@N-term; Deamidated(N)@2; Carbamyl(K)@11			-0.00329141	1243.51	622.765	1243.52	622.766	2	17	1.1.1.3214.3	34.1546	135.8	123.16	34.1	0.38	25467.1
5	20	20	94.44	94.44	94.44	tr|T0E503|T0E503_CLOSO	Small, acid-soluble spore protein alpha OS=Paeniclostridium sordellii ATCC 9714 GN=H477_1172 PE=4 SV=1			2	99	QNGYVGGYMTKK	Gln->pyro-Glu@N-term; Deamidated(N)@2; Lys-loss@C-term		missed K-K@11	0.010857	1200.52	601.269	1200.51	601.263	2	17	1.1.1.3195.3	32.2231	126.18	110.67	32.15	0.2	14208.1
5	20	20	94.44	94.44	94.44	tr|T0E503|T0E503_CLOSO	Small, acid-soluble spore protein alpha OS=Paeniclostridium sordellii ATCC 9714 GN=H477_1172 PE=4 SV=1			2	99	QNGYVGGYMTKKLVEMAEK	Gln->pyro-Glu@N-term; Hypusine(K)@11	Hypusine(K)@57	missed K-K@11; missed K-L@12	-0.0673891	2215.03	739.352	2215.1	739.375	3	17	1.1.1.3360.3	48.4175	67.83	67.28	48.35	0.35	20566.1
5	20	20	94.44	94.44	94.44	tr|T0E503|T0E503_CLOSO	Small, acid-soluble spore protein alpha OS=Paeniclostridium sordellii ATCC 9714 GN=H477_1172 PE=4 SV=1			2	99	QNGYVGGYMTKKLVEMAEKQMSGQQQ	Oxidation(M)@9; GG(K)@19	GG(K)@65	missed K-K@11; missed K-L@12; missed K-Q@19	-0.0267979	3062.4	1021.81	3062.43	1021.82	3	18	1.1.1.3376.3	49.8676	86.84	70.72	49.8	0.19	32639.1
5	20	20	94.44	94.44	94.44	tr|T0E503|T0E503_CLOSO	Small, acid-soluble spore protein alpha OS=Paeniclostridium sordellii ATCC 9714 GN=H477_1172 PE=4 SV=1			2	99	TKKLVEMAEKQMSGQQQ	Formyl@N-term		cleaved M-T@N-term; missed K-K@2; missed K-L@3; missed K-Q@10	-0.0159323	1990.97	664.663	1990.98	664.668	3	18	1.1.1.3248.4	37.4241	325.46	320.63	37.43	0.27	37362.1
5	20	20	94.44	94.44	94.44	tr|T0E503|T0E503_CLOSO	Small, acid-soluble spore protein alpha OS=Paeniclostridium sordellii ATCC 9714 GN=H477_1172 PE=4 SV=1			2	99	TNNNNQNSISVPEAKAALK	Deamidated(N)@7; Carbamyl(K)@15		cleaved M-T@N-term; missed K-A@15	-0.0224197	2056	686.339	2056.02	686.347	3	19	1.1.1.3211.4	33.9333	230.13	228.78	33.93	0.36	29298.1
5	20	20	94.44	94.44	94.44	tr|T0E503|T0E503_CLOSO	Small, acid-soluble spore protein alpha OS=Paeniclostridium sordellii ATCC 9714 GN=H477_1172 PE=4 SV=1			0	99	LEIANELGMSNYDTADKGNMTAR	Carbamidomethyl(S)@10; Carbamyl(K)@17		missed K-G@17	0.0065297	2613.19	872.069	2613.18	872.067	3	19	1.1.1.3216.3	34.3821	353.83	350.22	34.33	0.35	33269.1
5	20	20	94.44	94.44	94.44	tr|T0E503|T0E503_CLOSO	Small, acid-soluble spore protein alpha OS=Paeniclostridium sordellii ATCC 9714 GN=H477_1172 PE=4 SV=1			0	99	QNGYVGGYMTK	Deamidated(N)@2; Carbamyl(K)@11			0.0110128	1260.56	631.285	1260.54	631.28	2	18	1.1.1.3199.3	32.6885	157.63	154.47	32.62	0.34	20328.1
5	20	20	94.44	94.44	94.44	tr|T0E503|T0E503_CLOSO	Small, acid-soluble spore protein alpha OS=Paeniclostridium sordellii ATCC 9714 GN=H477_1172 PE=4 SV=1			0	99	QNGYVGGYMTKK	Gln->pyro-Glu@N-term; Deamidated(N)@2; Carbamyl(K)@11		missed K-K@11	0.0154112	1371.63	686.821	1371.61	686.814	2	20	1.1.1.3197.4	32.4812	243.49	214.48	32.61	0.24	17186.1
5	20	20	94.44	94.44	94.44	tr|T0E503|T0E503_CLOSO	Small, acid-soluble spore protein alpha OS=Paeniclostridium sordellii ATCC 9714 GN=H477_1172 PE=4 SV=1			0	99	QNGYVGGYMTKK	Gln->pyro-Glu@N-term; Deamidated(N)@2; Carbamyl(K)@11		missed K-K@11	0.0154112	1371.63	686.821	1371.61	686.814	2	19	1.1.1.3199.2	32.653	243.49	228.28	32.61	0.24	30804.1
5	20	20	94.44	94.44	94.44	tr|T0E503|T0E503_CLOSO	Small, acid-soluble spore protein alpha OS=Paeniclostridium sordellii ATCC 9714 GN=H477_1172 PE=4 SV=1			0	99	QNGYVGGYMTKKLVEMAEK	Deamidated(N)@2; Oxidation(K)@11; PyruvicAcidIminyl(K)@12	Oxidation(K)@57; PyruvicAcidIminyl(K)@58	missed K-K@11; missed K-L@12	0.0107822	2232.05	745.026	2232.04	745.022	3	22	1.1.1.3337.3	45.8602	211.21	209.61	45.81	0.33	33226.1
5	20	20	94.44	94.44	94.44	tr|T0E503|T0E503_CLOSO	Small, acid-soluble spore protein alpha OS=Paeniclostridium sordellii ATCC 9714 GN=H477_1172 PE=4 SV=1			0	99	QNGYVGGYMTKKLVEMAEK	Deamidated(N)@2; PyruvicAcidIminyl(K)@11; Oxidation(K)@12	PyruvicAcidIminyl(K)@57; Oxidation(K)@58	missed K-K@11; missed K-L@12	0.0107822	2232.05	745.026	2232.04	745.022	3	22	1.1.1.3337.3	45.8602	211.21	209.61	45.81	0.33	33226.1
5	20	20	94.44	94.44	94.44	tr|T0E503|T0E503_CLOSO	Small, acid-soluble spore protein alpha OS=Paeniclostridium sordellii ATCC 9714 GN=H477_1172 PE=4 SV=1			0	99	TNNNNQNSISVPEAKAALK	Deamidated(N)@3; Carbamyl(K)@15		cleaved M-T@N-term; missed K-A@15	-0.0224197	2056	686.339	2056.02	686.347	3	19	1.1.1.3211.4	33.9333	230.13	228.78	33.93	0.36	29298.1
6	14	14	30.68	30.68	30.68	tr|T0E6L8|T0E6L8_CLOSO	Peptidase M20/M25/M40 family protein OS=Paeniclostridium sordellii ATCC 9714 GN=H477_0435 PE=4 SV=1			2	99	LDLISDYPAWEYAK				-0.00123178	1682.82	842.416	1682.82	842.417	2	24	1.1.1.3304.4	42.4606	151.14	150.93	42.37	0.33	35831.1
6	14	14	30.68	30.68	30.68	tr|T0E6L8|T0E6L8_CLOSO	Peptidase M20/M25/M40 family protein OS=Paeniclostridium sordellii ATCC 9714 GN=H477_0435 PE=4 SV=1			2	99	LLNLLDVDFDLAK				-0.0164724	1487.81	744.911	1487.82	744.919	2	23	1.1.1.3367.2	49.1487	197.84	197.55	49.22	0.27	23765.1
6	14	14	30.68	30.68	30.68	tr|T0E6L8|T0E6L8_CLOSO	Peptidase M20/M25/M40 family protein OS=Paeniclostridium sordellii ATCC 9714 GN=H477_0435 PE=4 SV=1			2	99	LLNLLDVDFDLAKVEGGSK	Carbamyl(K)@13		missed K-V@13	-0.0129897	2088.1	697.04	2088.11	697.044	3	22	1.1.1.3395.2	50.8974	35.33	33.92	50.85	0.36	8981.13
6	14	14	30.68	30.68	30.68	tr|T0E6L8|T0E6L8_CLOSO	Peptidase M20/M25/M40 family protein OS=Paeniclostridium sordellii ATCC 9714 GN=H477_0435 PE=4 SV=1			2	99	LLNLLDVDFDLAKVEGGSKNNAIPR	Hypusine(K)@13	Hypusine(K)@29	missed K-V@13; missed K-N@19	-0.0422354	2797.49	700.38	2797.53	700.391	4	19	1.1.1.3396.2	50.944	14.11	13.97	51	0.5	10322.1
6	14	14	30.68	30.68	30.68	tr|T0E6L8|T0E6L8_CLOSO	Peptidase M20/M25/M40 family protein OS=Paeniclostridium sordellii ATCC 9714 GN=H477_0435 PE=4 SV=1			2	99	MELLISEFGGK				0.00259981	1222.63	612.322	1222.63	612.321	2	18	1.1.1.3301.4	42.1355	187.61	184.03	42.15	0.19	26276.1
6	14	14	30.68	30.68	30.68	tr|T0E6L8|T0E6L8_CLOSO	Peptidase M20/M25/M40 family protein OS=Paeniclostridium sordellii ATCC 9714 GN=H477_0435 PE=4 SV=1			2	99	SMDIENLVESSTNLGVLR			cleaved M-S@N-term	0.000907157	1975.99	659.67	1975.99	659.67	3	29	1.1.1.3345.2	46.6983	191.02	181.04	46.78	0.24	20412.1
6	14	14	30.68	30.68	30.68	tr|T0E6L8|T0E6L8_CLOSO	Peptidase M20/M25/M40 family protein OS=Paeniclostridium sordellii ATCC 9714 GN=H477_0435 PE=4 SV=1			2	99	SSVKSLKDDITAR	Carbamyl(K)@4; Carbamyl(K)@7		missed K-S@4; missed K-D@7	-0.00532983	1504.78	753.397	1504.78	753.4	2	20	1.1.1.3227.2	35.4227	378.94	377.22	35.4	0.33	34176.1
7	14	14	28.97	28.97	28.97	tr|T0D2M7|T0D2M7_CLOSO	Putative peptidoglycan binding domain protein OS=Paeniclostridium sordellii ATCC 9714 GN=H477_0372 PE=4 SV=1			2	99	DLGDQGLSYEEILR				-0.00218622	1606.78	804.398	1606.78	804.399	2	23	1.1.1.3276.4	39.8306	307.7	303.33	39.84	0.17	35824.1
7	14	14	28.97	28.97	28.97	tr|T0D2M7|T0D2M7_CLOSO	Putative peptidoglycan binding domain protein OS=Paeniclostridium sordellii ATCC 9714 GN=H477_0372 PE=4 SV=1			2	99	EDGIFGDALANSIK				0.0107816	1448.73	725.37	1448.71	725.365	2	23	1.1.1.3289.4	40.9679	152.49	142.06	40.88	0.3	28843.1
7	14	14	28.97	28.97	28.97	tr|T0D2M7|T0D2M7_CLOSO	Putative peptidoglycan binding domain protein OS=Paeniclostridium sordellii ATCC 9714 GN=H477_0372 PE=4 SV=1			2	99	EFQGIFGLPK				-0.00480631	1134.6	568.308	1134.61	568.311	2	15	1.1.1.3298.3	41.7842	81.25	79.66	41.83	0.42	17335.1
7	14	14	28.97	28.97	28.97	tr|T0D2M7|T0D2M7_CLOSO	Putative peptidoglycan binding domain protein OS=Paeniclostridium sordellii ATCC 9714 GN=H477_0372 PE=4 SV=1			2	99	IYVAVTKIASLNPTI	Carbamyl(K)@7		missed K-I@7	-0.028844	1644.92	823.465	1644.95	823.48	2	23	1.1.1.3329.3	45.0241	114.73	112.1	44.95	0.33	33188.1
7	14	14	28.97	28.97	28.97	tr|T0D2M7|T0D2M7_CLOSO	Putative peptidoglycan binding domain protein OS=Paeniclostridium sordellii ATCC 9714 GN=H477_0372 PE=4 SV=1			2	99	SFYGEGIVFEK				0.00265078	1274.62	638.318	1274.62	638.316	2	19	1.1.1.3260.3	38.4233	360.89	325.56	38.45	0.25	28601.1
7	14	14	28.97	28.97	28.97	tr|T0D2M7|T0D2M7_CLOSO	Putative peptidoglycan binding domain protein OS=Paeniclostridium sordellii ATCC 9714 GN=H477_0372 PE=4 SV=1			2	99	VFTEWYR				0.00553948	999.487	500.751	999.481	500.748	2	11	1.1.1.3233.4	36.052	162.77	161.49	36.05	0.25	23011.1
7	14	14	28.97	28.97	28.97	tr|T0D2M7|T0D2M7_CLOSO	Putative peptidoglycan binding domain protein OS=Paeniclostridium sordellii ATCC 9714 GN=H477_0372 PE=4 SV=1			2	99	VREDGIFGDALANSIK			missed R-E@2	-0.00890595	1703.88	568.966	1703.88	568.969	3	20	1.1.1.3273.3	39.5546	60.49	60.4	39.49	1.05	35005.1
8	12	16	84.62	84.62	84.62	tr|T2RDK8|T2RDK8_CLOSO	Small, acid-soluble spore protein beta OS=Paeniclostridium sordellii ATCC 9714 GN=H477_4660 PE=4 SV=1			2	99	AALNQMKLEIANELGLSNYDTVDK	Carbamyl(K)@7		missed K-L@7	0.00120643	2692.34	898.454	2692.34	898.453	3	40	1.1.1.3376.2	49.8386	58.22	54.93	49.81	0.19	31743.1
8	12	16	84.62	84.62	84.62	tr|T2RDK8|T2RDK8_CLOSO	Small, acid-soluble spore protein beta OS=Paeniclostridium sordellii ATCC 9714 GN=H477_4660 PE=4 SV=1			2	99	AVPEAKAALNQM	Carbamyl@N-term		cleaved M-K@C-term; missed K-A@6	-0.0113843	1284.64	643.326	1284.65	643.332	2	15	1.1.1.3225.3	35.2333	117.34	116.86	35.13	0.42	23891.1
8	12	16	84.62	84.62	84.62	tr|T2RDK8|T2RDK8_CLOSO	Small, acid-soluble spore protein beta OS=Paeniclostridium sordellii ATCC 9714 GN=H477_4660 PE=4 SV=1			2	99	KLEIANELGLSNYDTVDK	Carbamyl@N-term		cleaved M-K@N-term; missed K-L@1	0.0058505	2064.04	689.022	2064.04	689.02	3	26	1.1.1.3292.2	41.2039	270.2	263.52	41.17	0.2	35851.1
8	12	16	84.62	84.62	84.62	tr|T2RDK8|T2RDK8_CLOSO	Small, acid-soluble spore protein beta OS=Paeniclostridium sordellii ATCC 9714 GN=H477_4660 PE=4 SV=1			2	99	LEIANELGLSNYDTVDK				-0.00103049	1892.94	631.986	1892.94	631.986	3	25	1.1.1.3281.2	40.1558	472.16	463.5	40.21	0.28	35129.1
[truncated: 221 more rows]
